# Supplementary material for: Genomic insights into the cold adaptation of human populations in the Amur River Basin
Source: Research Square preprint supplement (doi:10.21203/rs.3.rs-4637970/v1), 2024-08-06
Supplement: Supplementary file 1 [file 48c85b3beb95b2437afcce4f.pdf]

# **Genomic insights into the cold adaptation of human populations in the Amur River Basin**

## **Supplementary Materials**

Siqin Chen<sup>1,§</sup>, Hao Chen<sup>2,§</sup>, Zhaoqing Yang<sup>3,§</sup>, Yang Gao<sup>1,4</sup>, Kuiting Tao<sup>1</sup>, Jiayou Chu<sup>3\*</sup>, Shuhua Xu<sup>1\*</sup>

<sup>1</sup>State Key Laboratory of Genetic Engineering, Human Phenome Institute, Zhangjiang Fudan International Innovation Center, Center for Evolutionary Biology, School of Life Sciences, Department of Liver Surgery and Transplantation Liver Cancer Institute, Zhongshan Hospital, Fudan University, Shanghai 200032, China

<sup>2</sup>Key Laboratory of Computational Biology, Shanghai Institute of Nutrition and Health, University of Chinese Academy of Sciences, Chinese Academy of Sciences, Shanghai 200031, China;

<sup>3</sup>Department of Medical Genetics, Institute of Medical Biology, Chinese Academy of Medical Sciences, Kunming 650118, China

<sup>4</sup>Ministry of Education Key Laboratory of Contemporary Anthropology, Fudan University, Shanghai 201203, China;

<sup>§</sup>These authors contributed equally to this work.

<sup>\*</sup>Correspondence: xushua@fudan.edu.cn (S.X.), chuzy@imbcams.com.cn (J.C.)

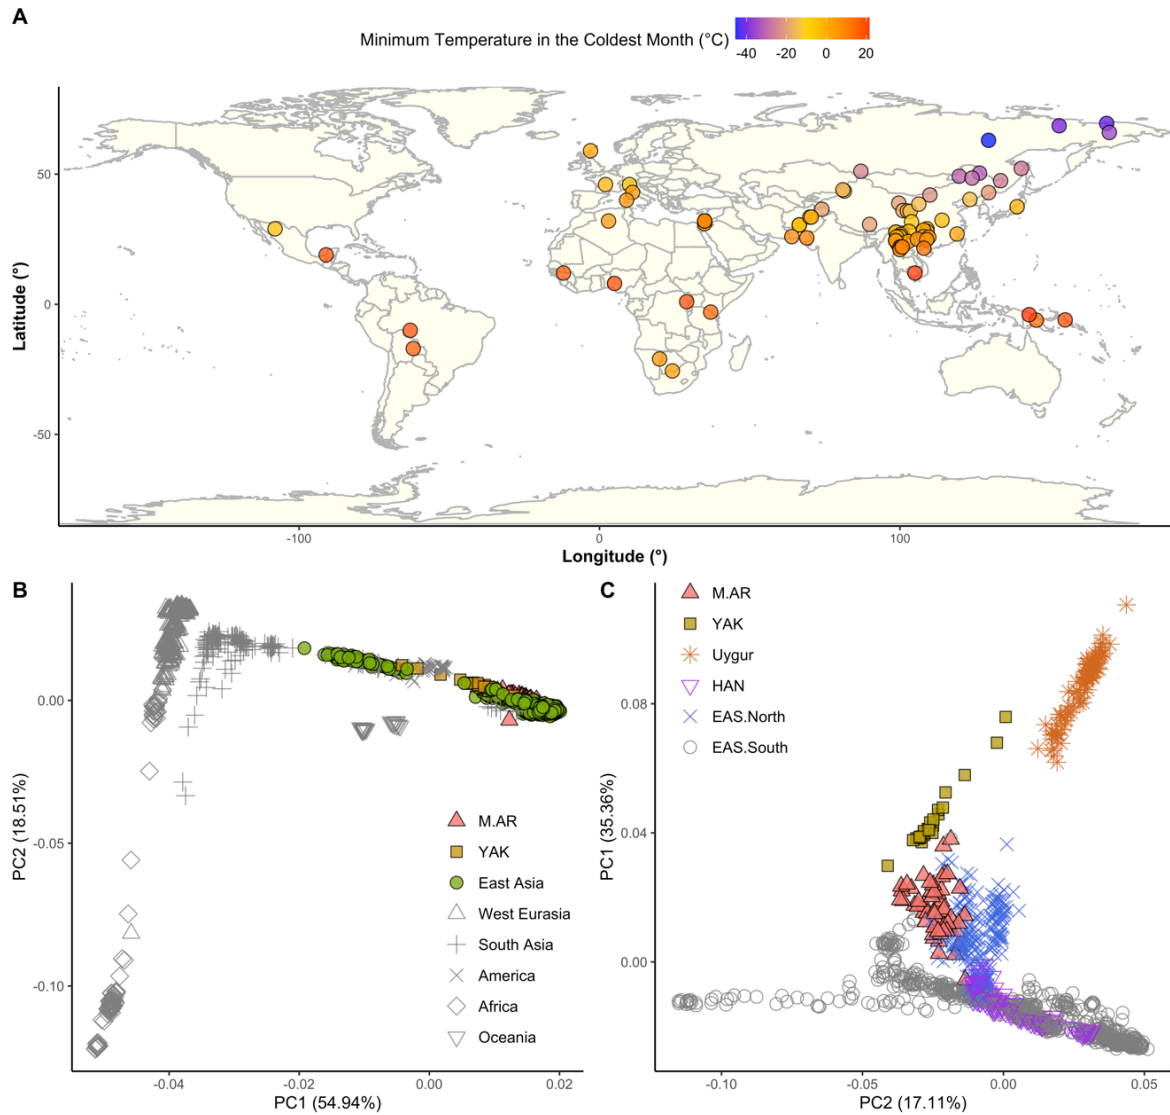

**Fig. S1. Principal component analysis (PCA) in the global context.**

A: Geographic locations of global populations used for PCA. The color of the dot represents the minimum temperature of the coldest month (°C), ranging from -45.5°C to 21.6°C.

B and C: PCA with 170,943 SNPs of (B) the global populations (1,721 individuals), and (C) East Asians and YAK (1,193 individuals). EAS.North: other northern East Asians; EAS.South: southern East Asians.

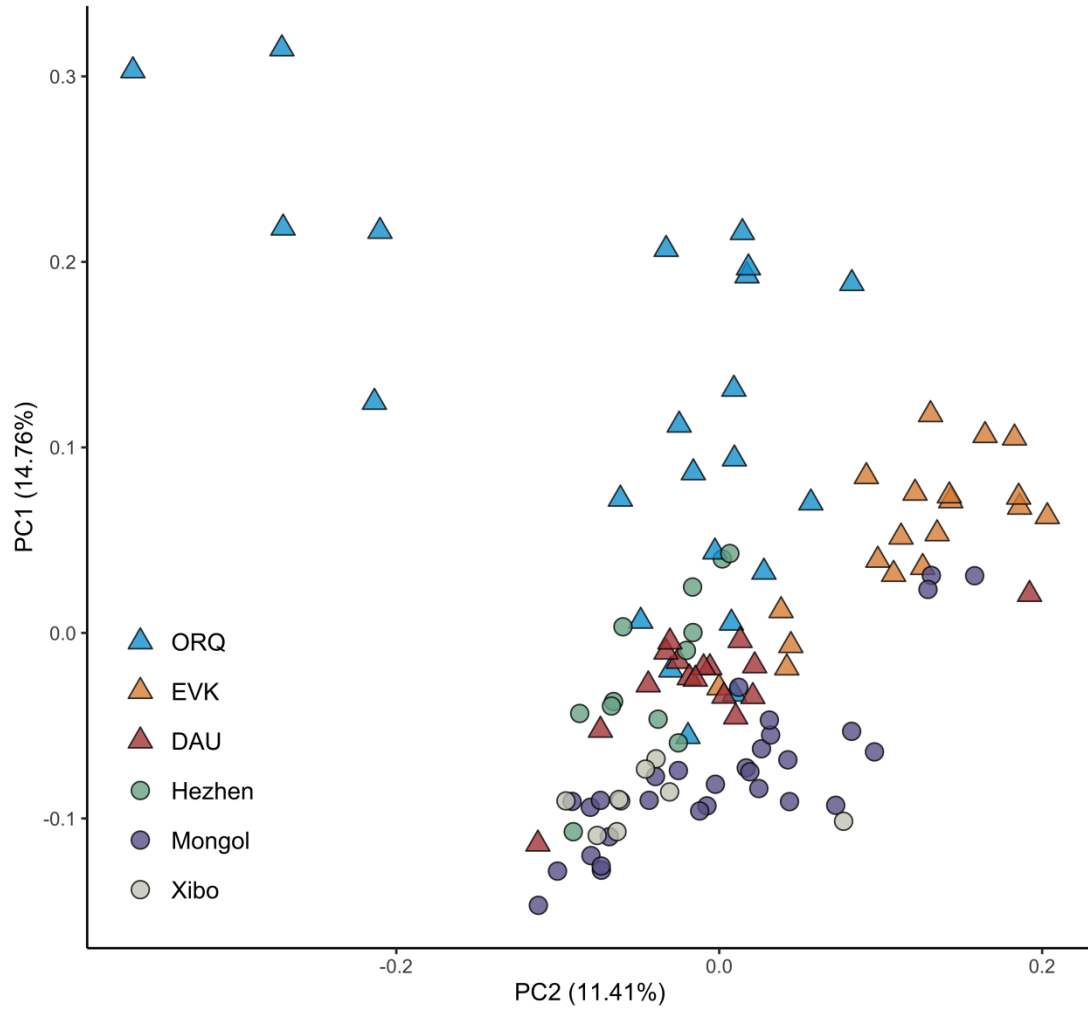

**Fig. S2. PCA of M.AR populations and the Mongol, Hezhen, and Xibo populations.**  
 PCA with 170,943 SNPs of three M.AR populations and the Mongol, Hezhen, and Xibo populations (109 individuals).

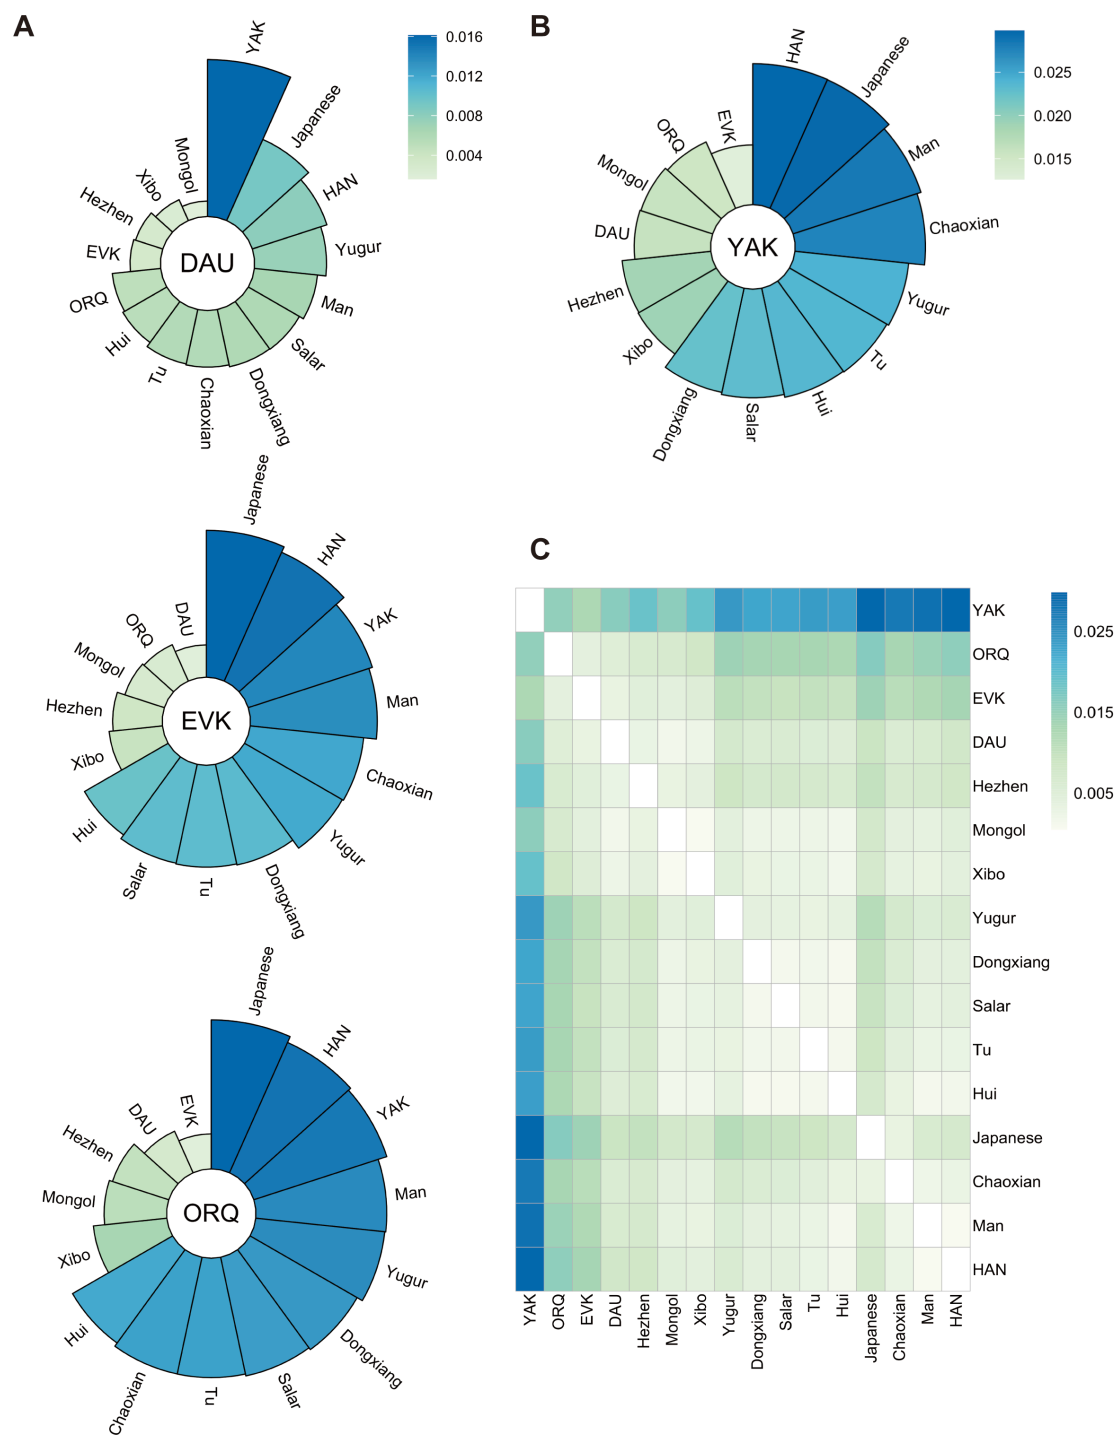

**Fig. S3. Population differentiation measured by the unbiased fixation index ( $F_{ST}$ ).**

A:  $F_{ST}$  between each M.AR and other populations in northern East Asia and Siberia.

B:  $F_{ST}$  between YAK and all northern East Asian populations.

C: Heatmap of pairwise  $F_{ST}$  among populations in northern East Asia and Siberia.



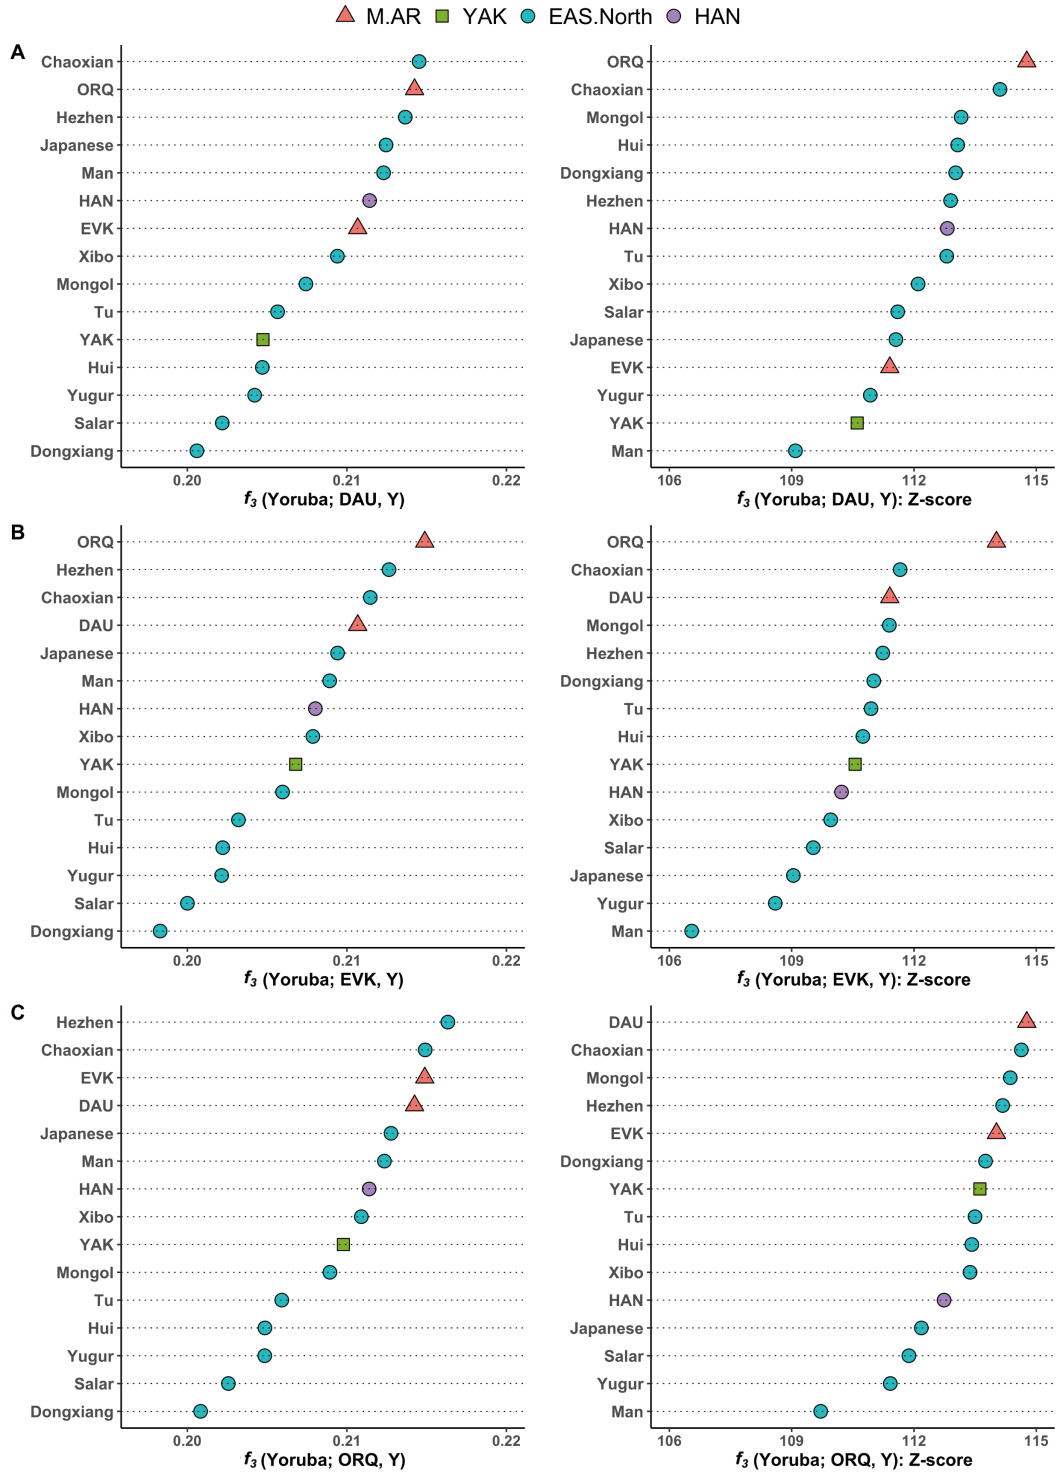

**Fig. S4. Population differentiation measured by the outgroup  $f_3$  statistic.**

The outgroup  $f_3$  statistic is in the form of  $f_3(\text{Yoruba}; X, Y)$ , assuming Y is the population from other northern East Asian populations and X is (A) DAU, (B) EVK, and (C) ORQ. The higher  $f_3$  value and Z-score indicate a closer genetic distance between two populations.

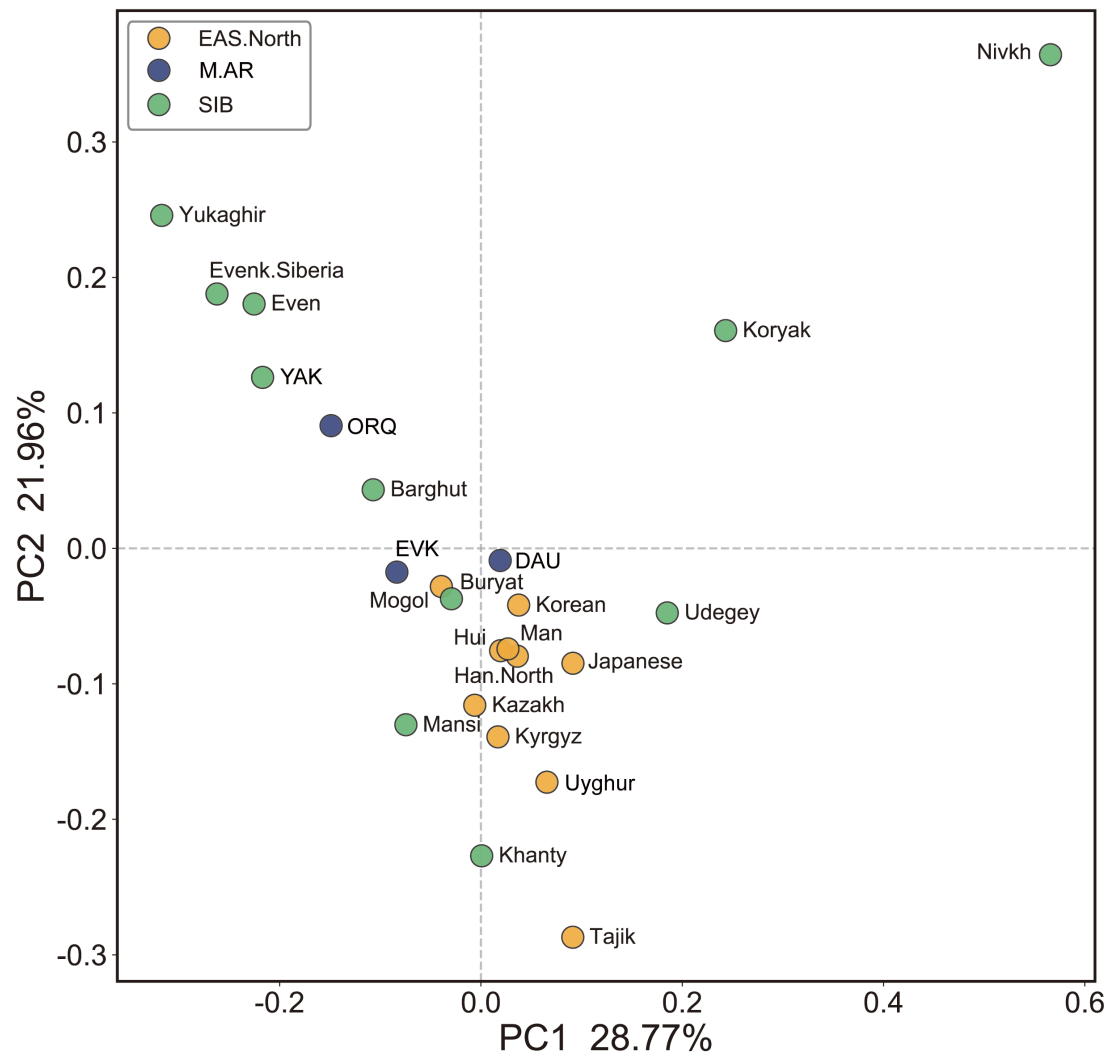

**Fig. S5. PCA based on mtDNA haplogroup frequency of M.AR, northern East Asian and Siberian populations.**

Genetic structure at the maternal level is measured by mtDNA haplogroup frequency of populations in northern East Asia and Siberia. EAS.North: other northern East Asians; SIB: Siberians.

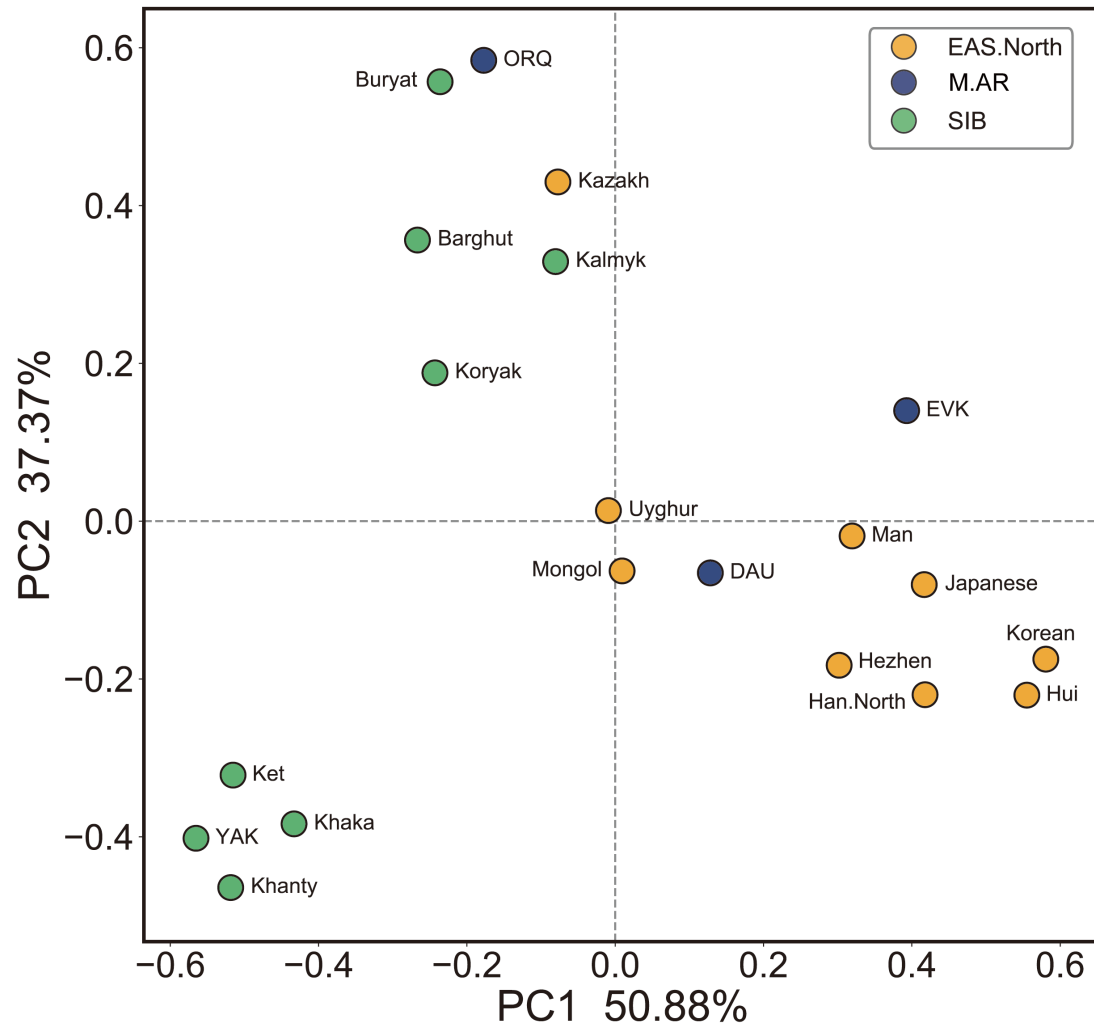

**Fig. S6. PCA based on NRY haplogroup frequency of M.AR, northern East Asian and Siberian populations.**

Genetic structure at the paternal level is measured by NRY haplogroup frequency of populations in northern East Asia and Siberia. EAS.North: other northern East Asians; SIB: Siberians.

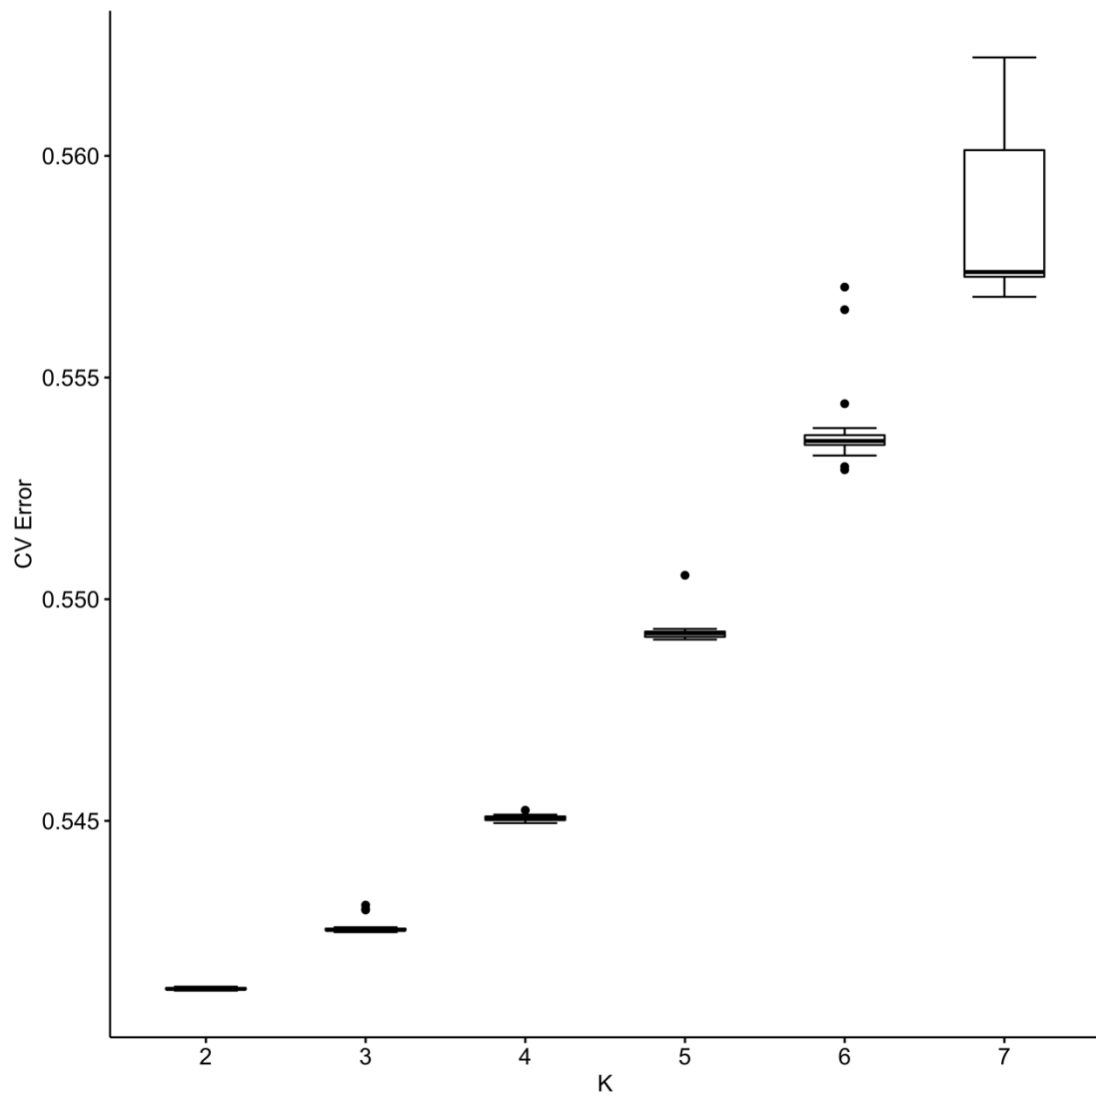

**Fig. S7. Cross-validation (CV) error of *ADMIXTURE* analysis.**

The CV-error scores for K=2 to 7 over the 20 iterations of *ADMIXTURE* analysis performed in the context of northern East Asia and Siberia. The best K is 2 with the lowest CV error.

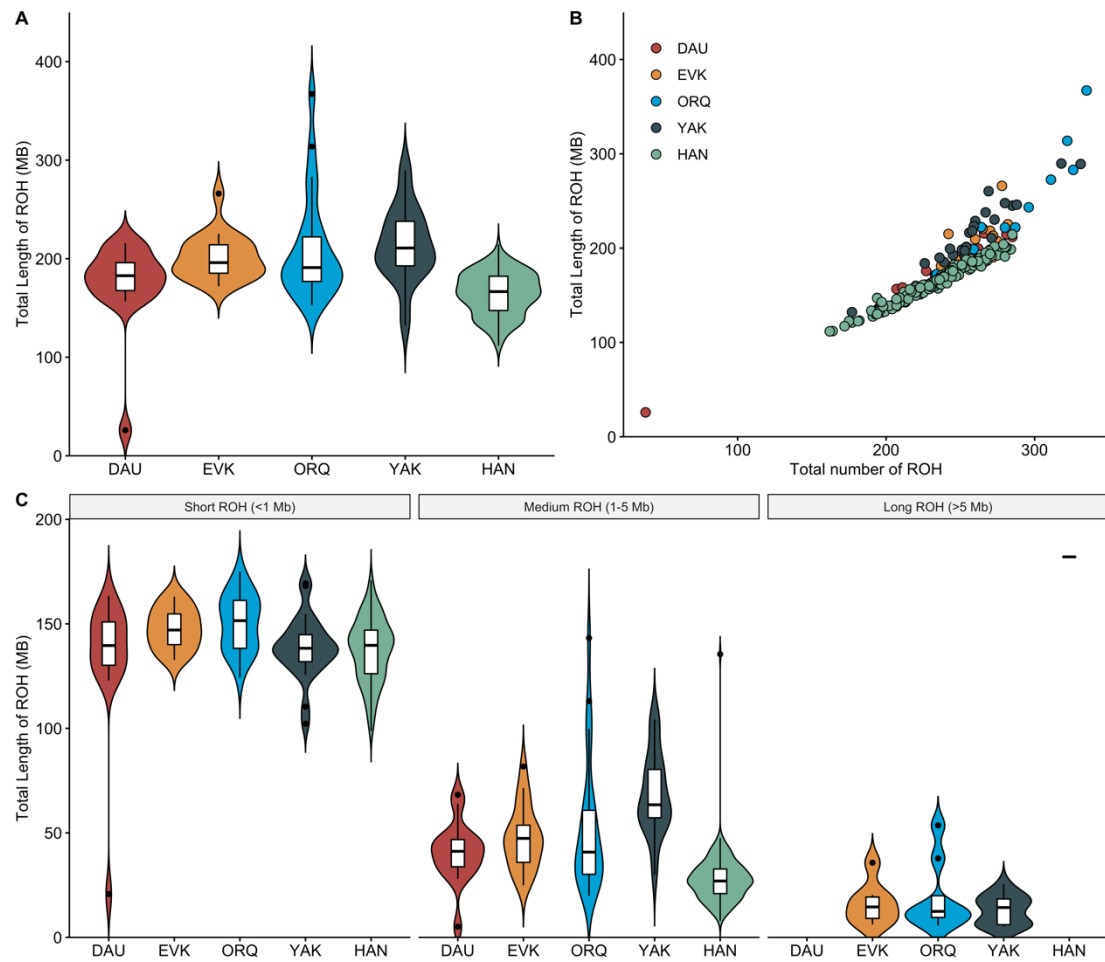

**Fig. S8. Runs of homozygosity (ROH) of M.AR populations, YAK, and HAN.**

A: The total length of ROH in M.AR populations, YAK, and HAN.

B: Comparison of the total number of ROH (x-axis) and the total length of ROH (y-axis) at the individual level.

C: The total length of short (< 1Mb), medium (1-5 Mb), and long ROH (> 5 Mb) in M.AR populations, YAK, and HAN.

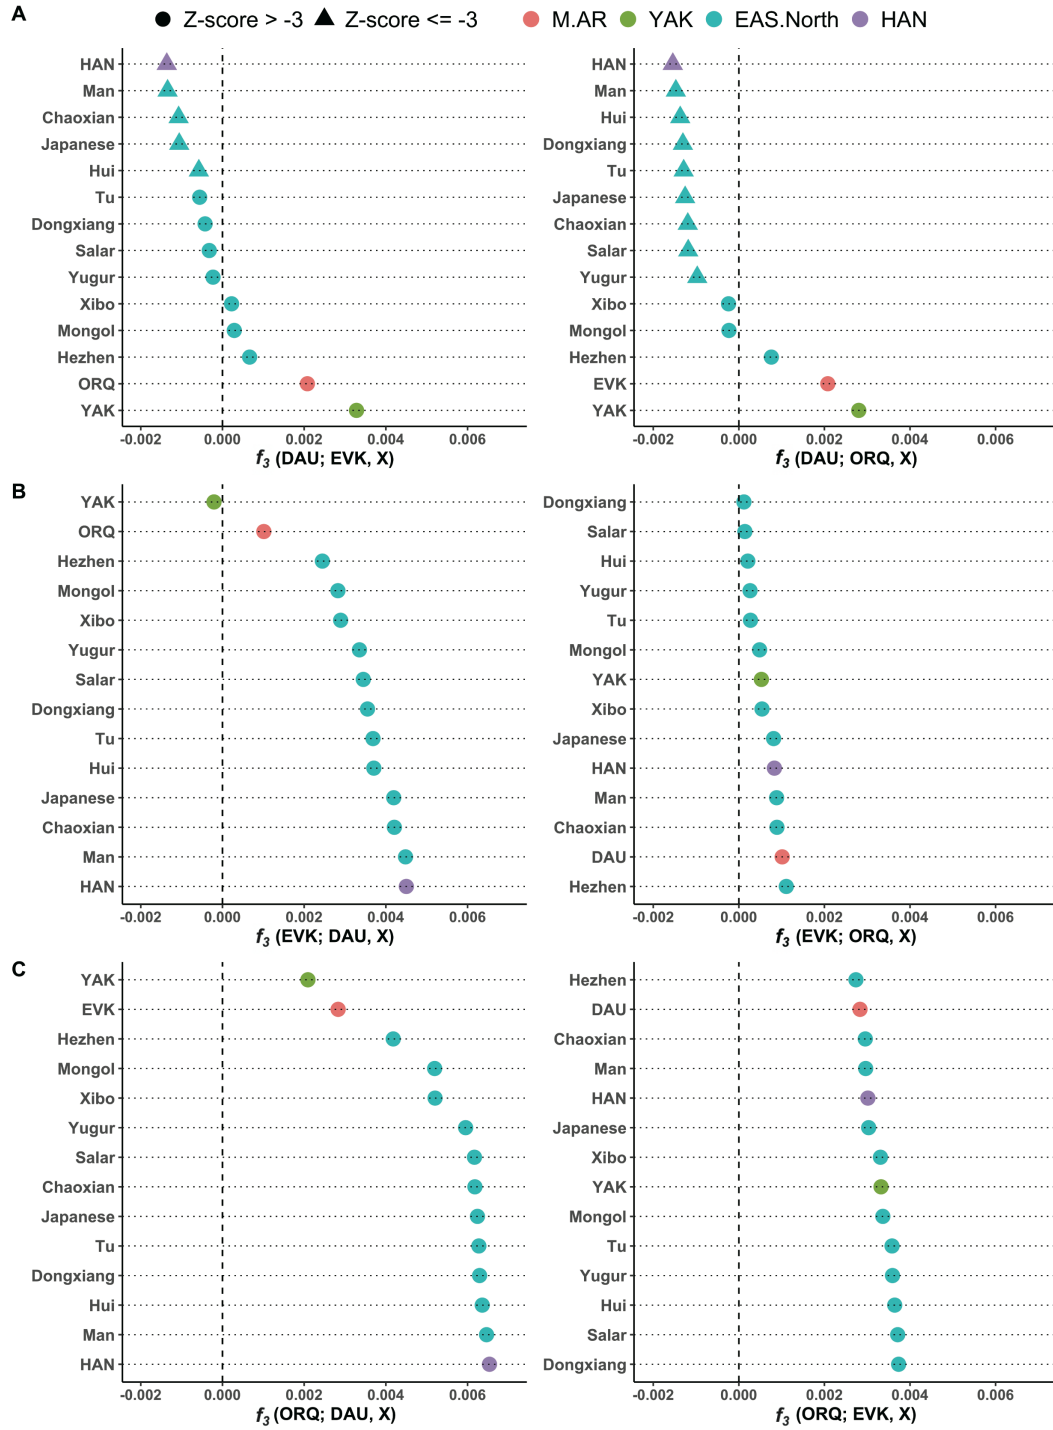

**Fig. S9. Potential gene introgression in M.AR estimated by the  $f_3$  statistic.**

The  $f_3$  statistic is in the form of  $f_3(X; Y, Z)$ , where X represents the target M.AR populations, including (A) DAU, (B) EVK, and (C) ORQ, Y represents each of the other two M.AR populations, and Z represents other populations in northern East Asia and Siberia. Significantly negative values of the  $f_3$  statistic ( $f_3 < 0$  and Z-score  $\leq -3$ ) indicate that X is a mixture of two populations Y and Z.

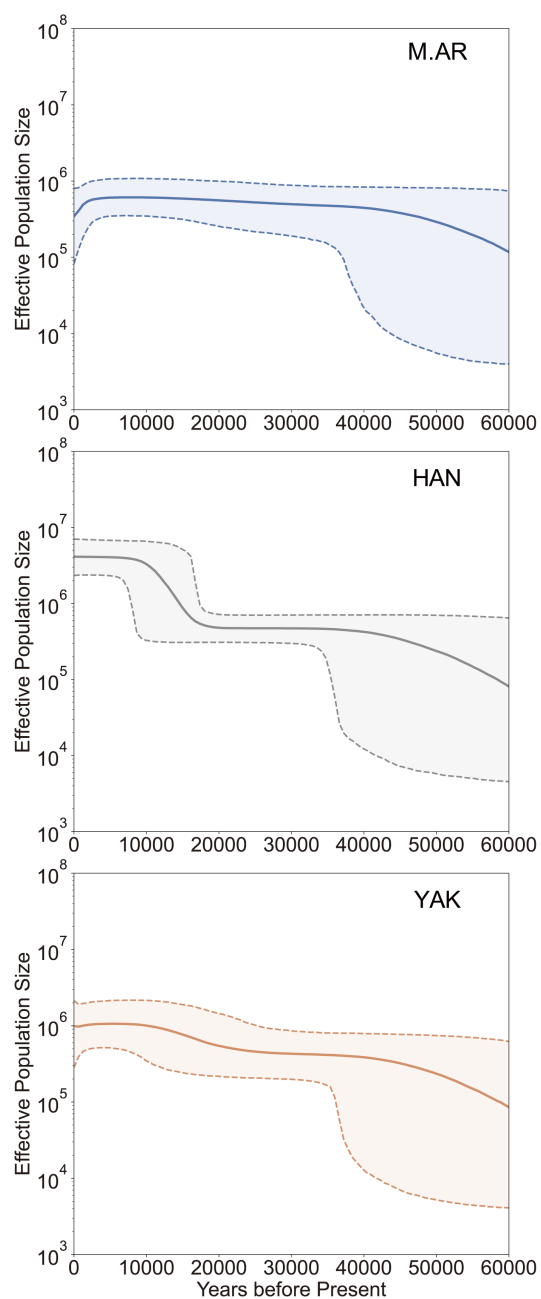

**Fig. S10. Bayesian skyline plot of M.AR, YAK, and HAN based on mtDNA .**

Bayesian skyline plot based on mtDNA showing effective population size of M.AR, YAK, and HAN. The colored light region indicates the 95% confidence interval (CI) for estimations.

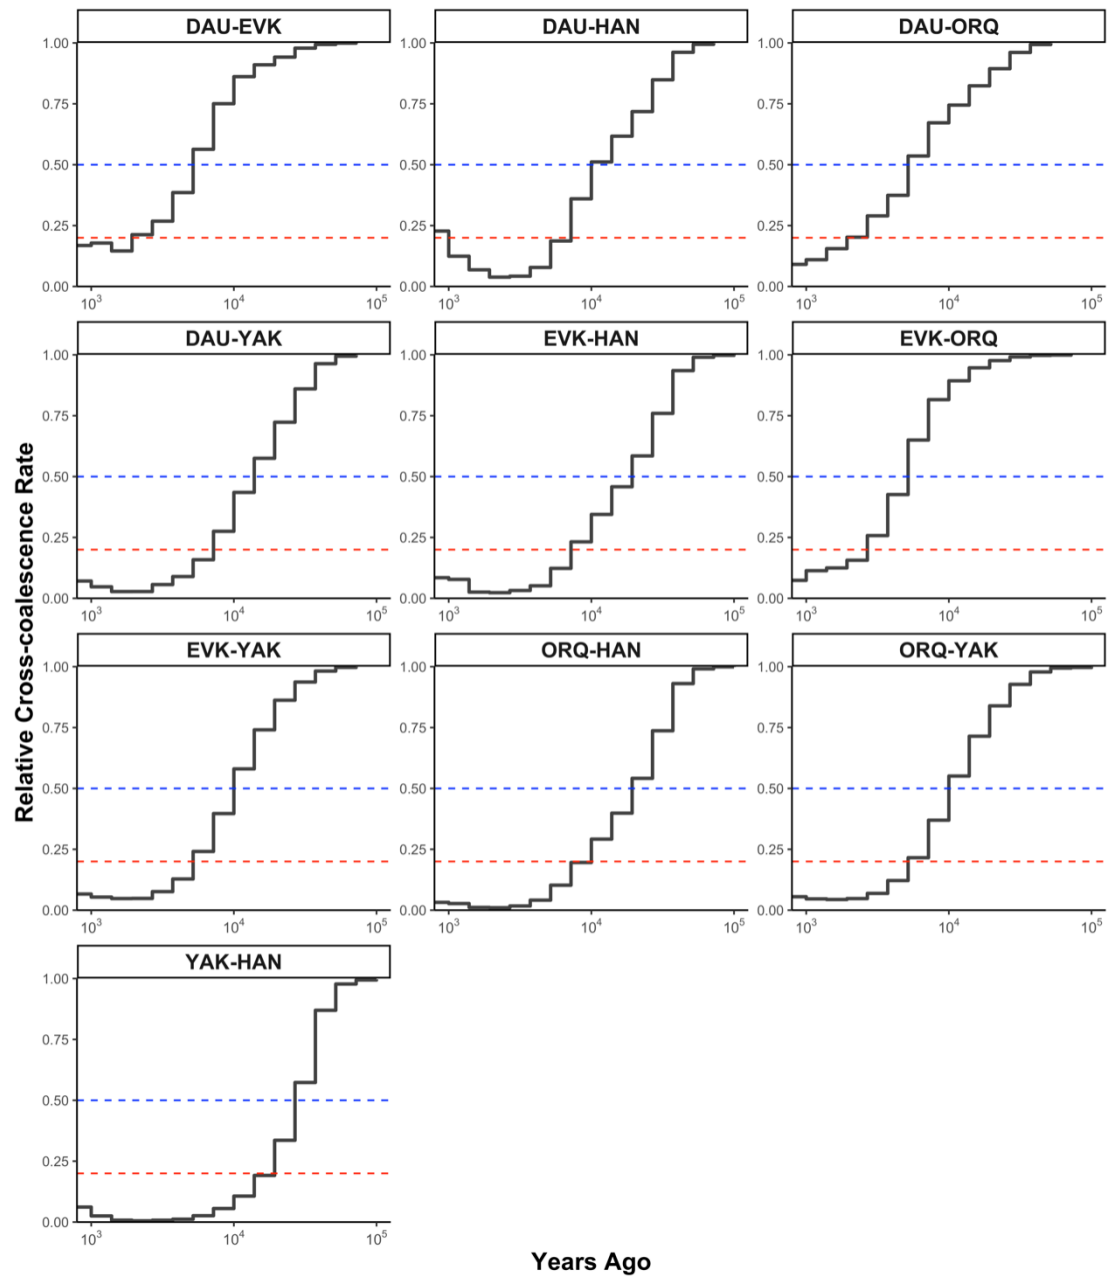

**Fig. S11. Estimates of the pairwise divergence of three M.A.R. populations, YAK, and HAN.**

An autosomal mutation rate used in the estimates was  $1.25 \times 10^{-8}$  per base-pair per generation, with 25 years assumed per generation. The mid-point (0.5, blue dashed line) was considered as the start of separation, and the point of 0.2 (red dashed line) was considered the time when the two populations were separated.



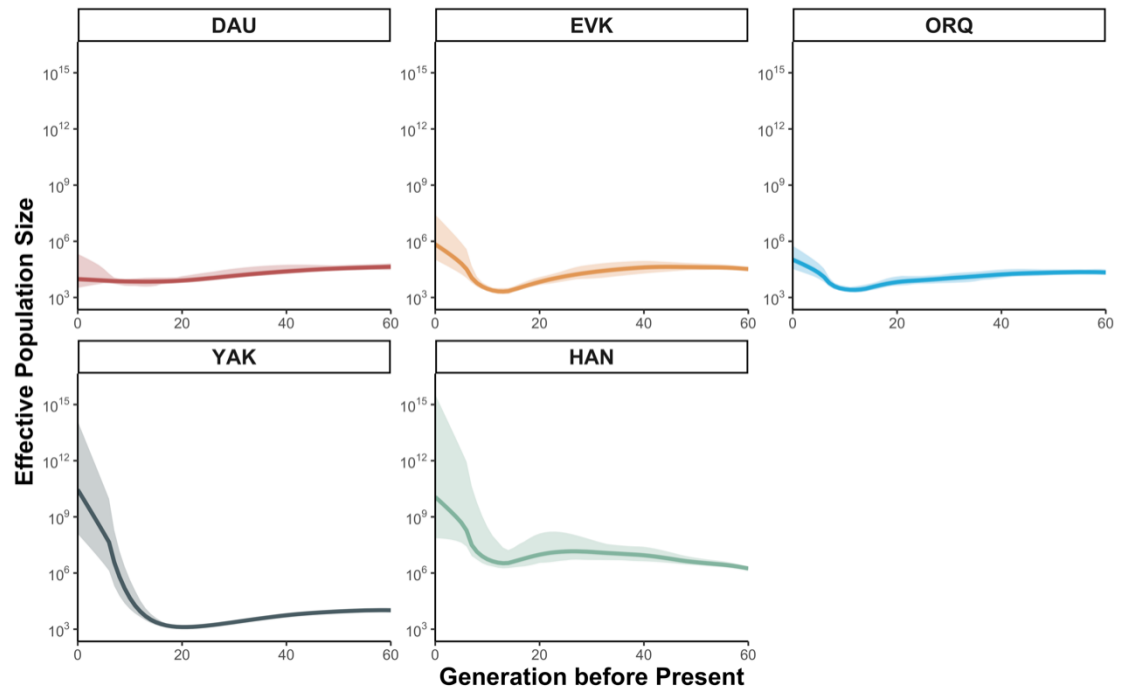

**Fig. S12. Recent population demography of three M.AR populations, YAK, and HAN.**

Estimates of recent effective population size based on IBD sharing using *IBDNe*. The recent effective population sizes within 60 generations of YAK and HAN were used for comparison with M.AR populations. The colored light region indicates the 95% CI.

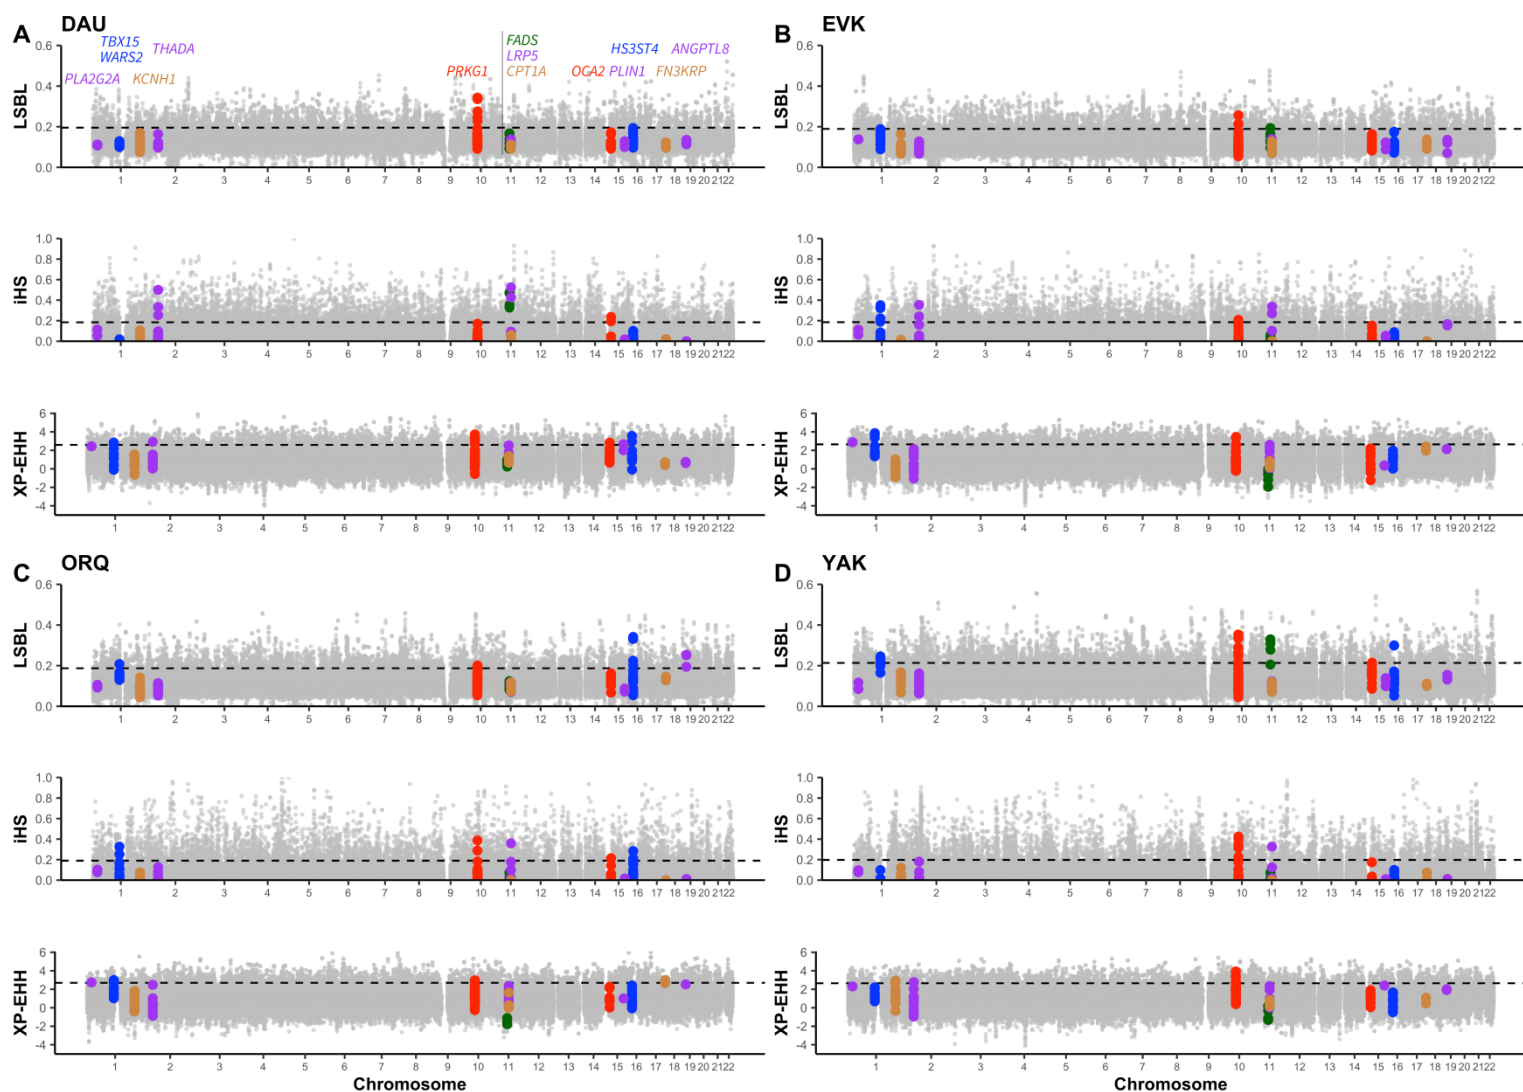

**Fig. S13. Selection tests on reported cold adaptation related (CAR) genes using three statistical methods (LSBL, iHS, and XP-EHH).**

For each M.AR population and YAK, three Manhattan plots show the LSBL, iHS, and XP-EHH values across the whole genome from top to bottom. LSBL was calculated using HAN and the French population as reference populations. XP-EHH was calculated using HAN as the reference population. Each point indicates one 50-kb window. The black dashed line indicates the significance threshold (empirical  $P$  value = 0.05). The colored points highlight the windows that overlap with reported CAR genes.

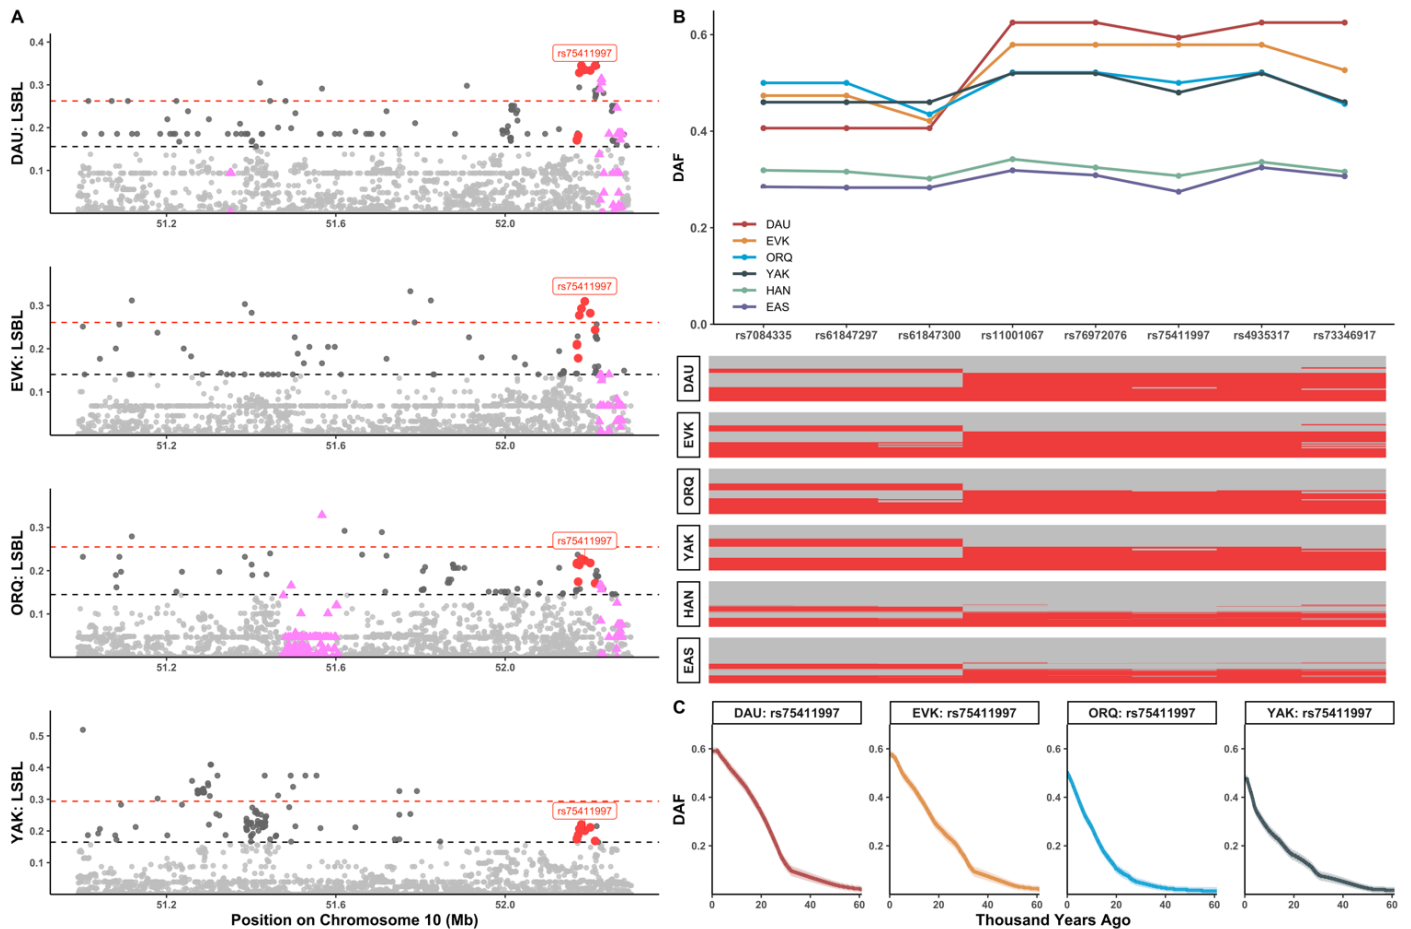

**Fig. S14. LSBL local distribution and haplotype pattern within *PRKG1*.**

A: Local distribution of LSBL values within *PRKG1* in each M.AR population and YAK. The black and red dashed lines indicate the top 1% and 0.1% threshold of the empirical distribution of LSBL, respectively. Each point represents one SNP, and each purple triangle represents one archaic ancestry informative marker (aAIM). Red dots represent eight highly differentiated SNPs in both M.AR and YAK, of which rs75411997 showed the strongest selection signal evidenced by *RELATE*.

B: The haplotype consisted of eight highly differentiated SNPs in both M.AR and YAK. The upper plot shows the DAF value of each variant in each population. The lower plot shows the haplotype distribution in each population, and red and grey represent the derived and ancestral alleles, respectively. EAS: East Asians except M.AR and HAN.

C: The allele frequency trajectories across time in each M.AR population and YAK. According to the *RELATE* results, rs75411997 showed the strongest selection signal in each population, so we used it to tag this haplotype. The solid line indicates the frequency trajectory of rs75411997, as inferred by *CLUES*, and the colored region indicates the 95% CI.

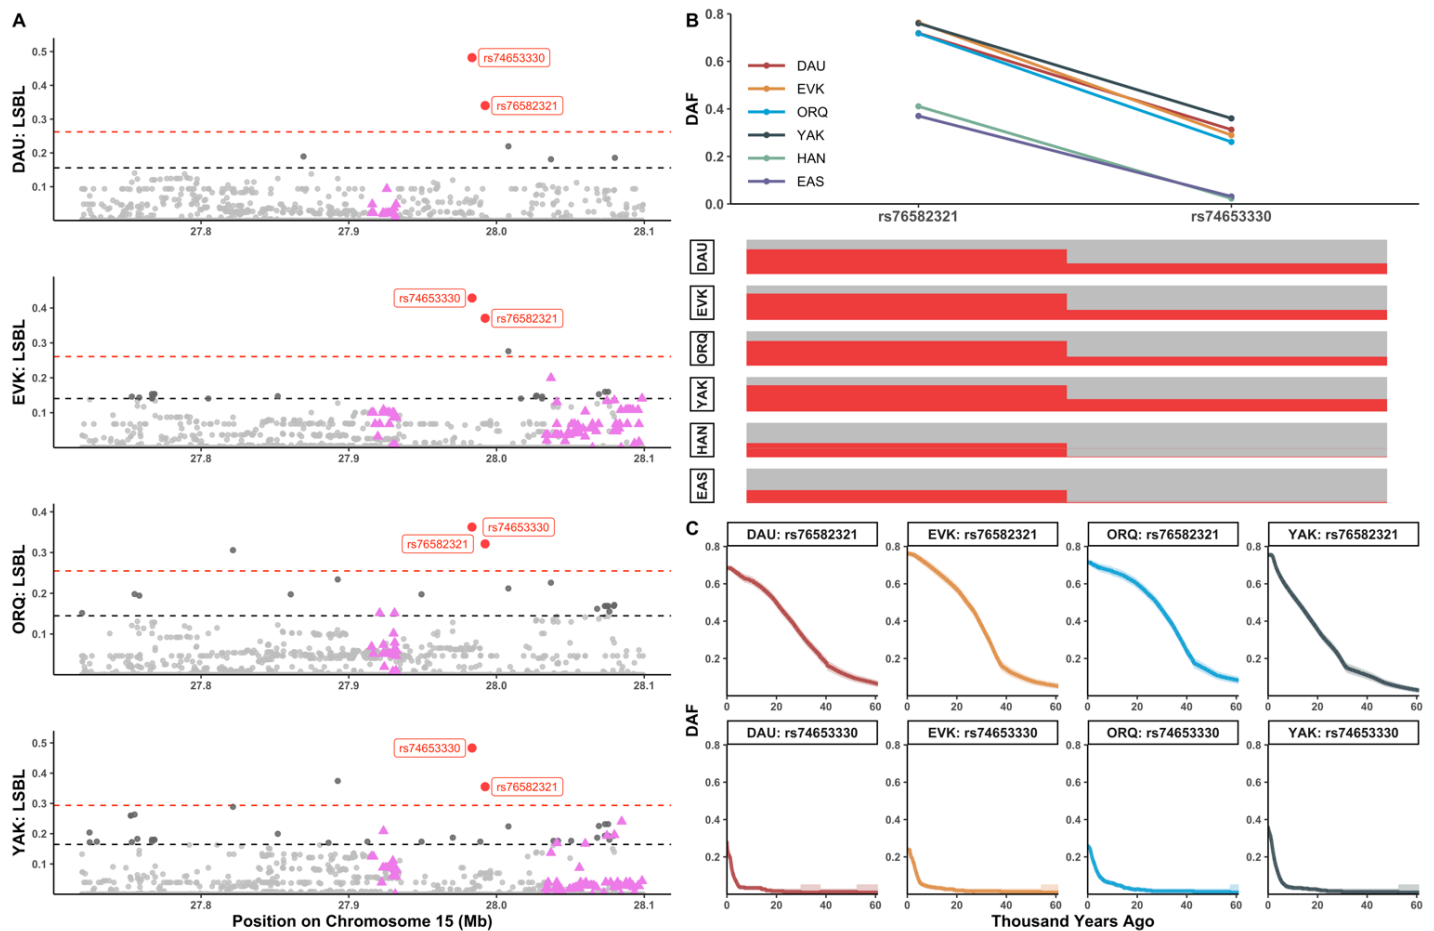

**Fig. S15. LSBL local distribution and haplotype pattern within *OCA2*.**

A: Local distribution of LSBL values within *OCA2* in each M.AR population and YAK. The black and red dashed lines indicate the top 1% and 0.1% threshold of the empirical distribution of LSBL, respectively. Each point represents one SNP, and each purple triangle represents one aAIM. Red dots represent two extremely highly differentiated SNPs (rs74653330 and rs76582321) in both M.AR and YAK.

B: The haplotype consisted of rs74653330 and rs76582321 in both M.AR and YAK. The upper plot shows the DAF value of each variant in each population. The lower plot shows the haplotype distribution in each population, and red and grey represent the derived and ancestral alleles, respectively. EAS: East Asians except M.AR and HAN.

C: The allele frequency trajectories across time in each M.AR population and YAK. The solid line indicates the frequency trajectory of each variant, as inferred by *CLUES*, and the colored region indicates the 95% CI.

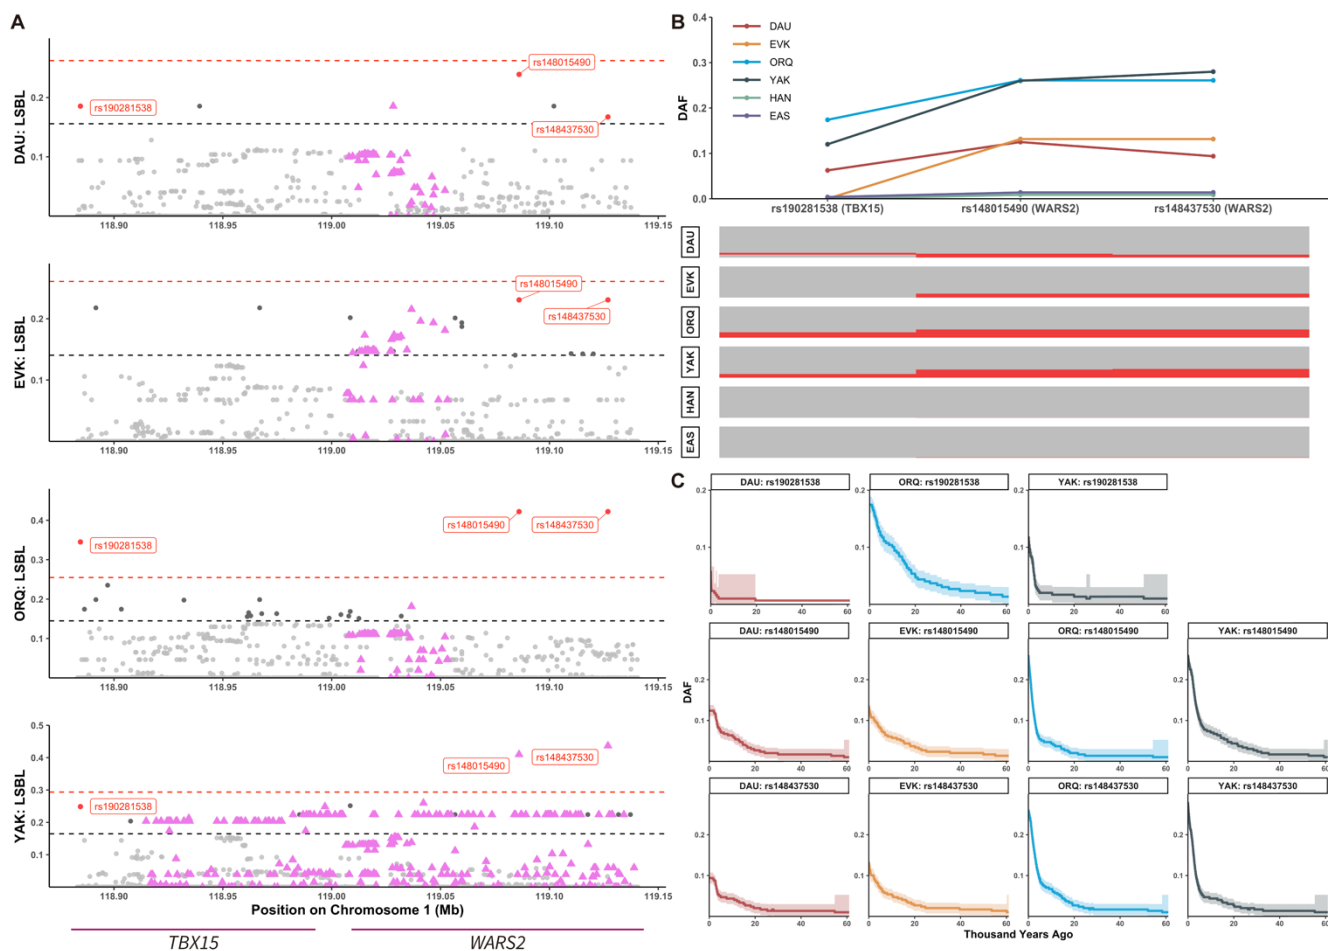

**Fig. S16. LSBL local distribution and haplotype pattern within *TBX15* and *WARS2*.**

A: Local distribution of LSBL values within *TBX15* and *WARS2* in each M.AR population and YAK. The black and red dashed lines indicate the top 1% and 0.1% threshold of the empirical distribution of LSBL, respectively. Each point represents one SNP, and each purple triangle represents one aAIM. Red dots represent three SNPs (rs190281538, rs148015490, and rs148437530) with the highest LSBL values in both M.AR and YAK. In particular, the derived allele of rs190281538 is absent in EVK, and rs148015490 and rs148437530 are aAIMs in YAK.

B: The haplotype consisted of rs190281538, rs148015490, and rs148437530 in both M.AR and YAK. The upper plot shows the DAF value of each variant in each population. The lower plot shows the haplotype distribution in each population, and red and grey represent the derived and ancestral alleles, respectively. EAS: East Asians except M.AR and HAN.

C: The allele frequency trajectories across time in each M.AR population and YAK. The solid line indicates the frequency trajectory of each variant, as inferred by *CLUES*, and the colored region indicates the 95% CI.

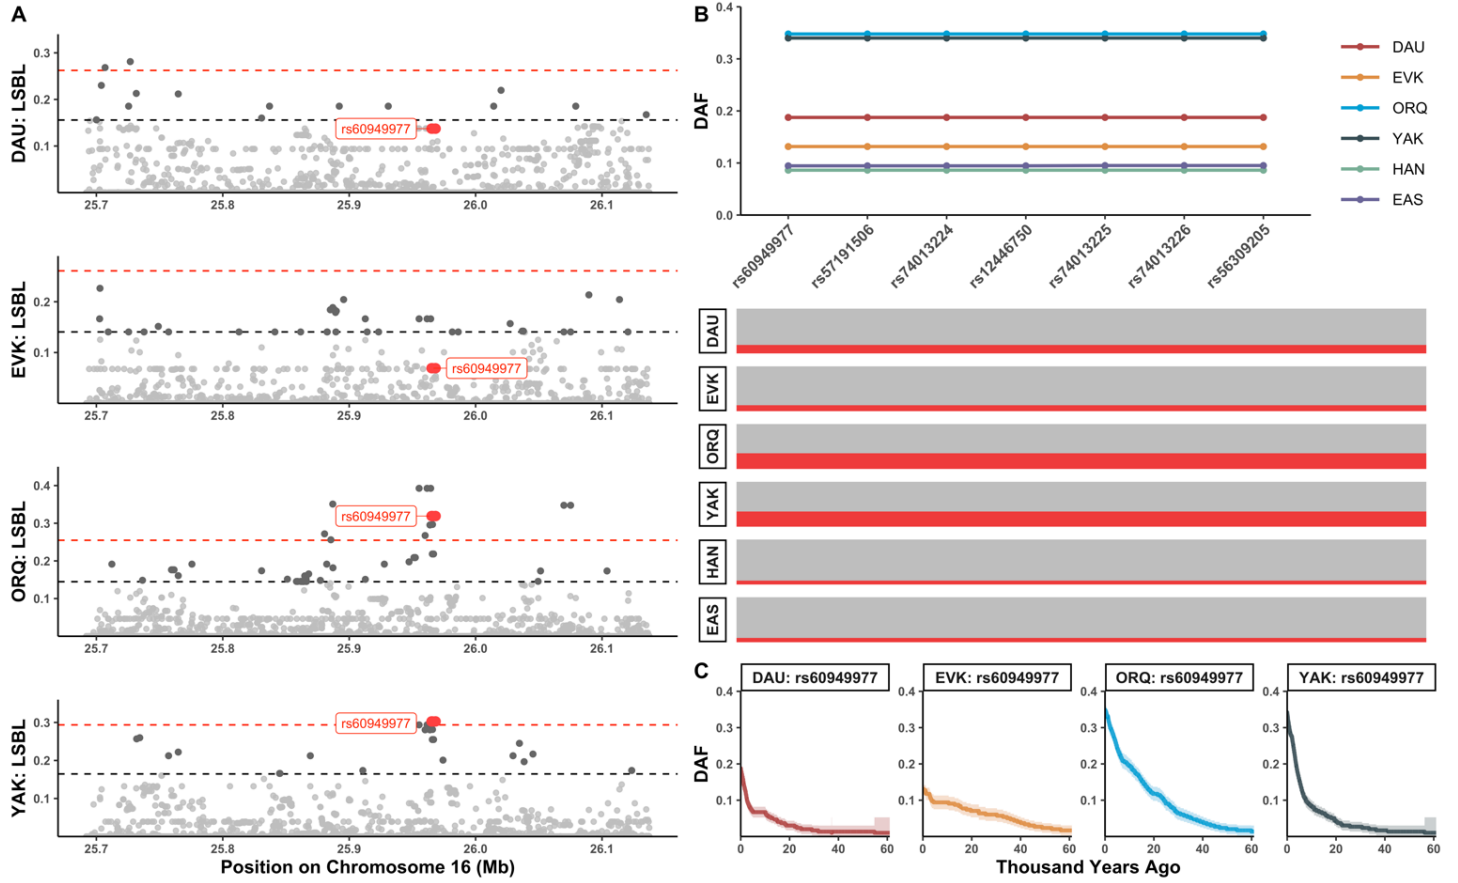

**Fig. S17. LSBL local distribution and haplotype pattern within *HS3ST4*.**

A: Local distribution of LSBL values within *HS3ST4* in each M.AR population and YAK. The black and red dashed lines indicate the top 1% and 0.1% threshold of the empirical distribution of LSBL, respectively. Each point represents one SNP, and red dots represent seven extremely highly differentiated SNPs in ORQ and YAK, of which rs60949977 showed the strongest selection signal evidenced by *RELATE*.

B: The haplotype consisted of seven extremely highly differentiated SNPs in ORQ and YAK. The upper plot shows the DAF value of each variant in each population. The lower plot shows the haplotype distribution in each population, and red and grey represent the derived and ancestral alleles, respectively. EAS: East Asians except M.AR and HAN.

C: The allele frequency trajectories across time in each M.AR population and YAK. According to the *RELATE* results, rs60949977 showed the strongest selection signal in each population, so we used it to tag this haplotype. The solid line indicates the frequency trajectory of rs60949977, as inferred by *CLUES*, and the colored region indicates the 95% CI.



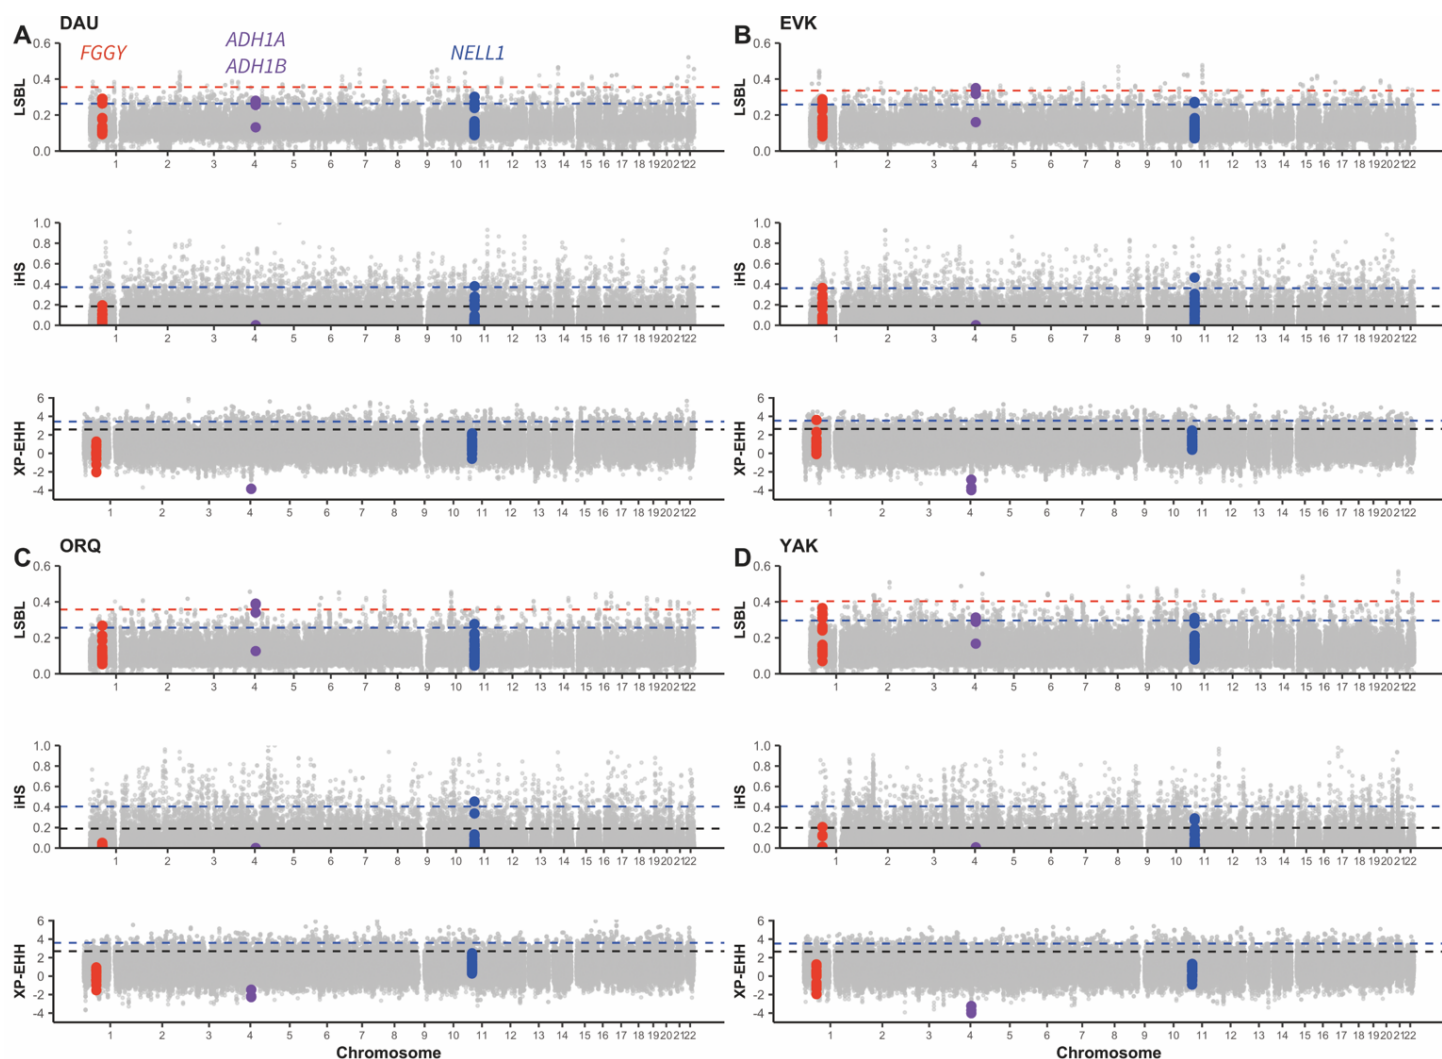

**Fig. S18. Newly identified selection signals related to cold adaptation in M.AR populations.**

For each M.AR population and YAK, LSBL was calculated using HAN and the French population as reference populations, and XP-EHH was calculated using HAN as the reference population. Each point indicates one 50-kb window. The black dashed line indicates the significance threshold (empirical  $P$  value = 0.05), and the blue and red dashed lines indicate the top 1% and 0.1% threshold of the empirical distribution of each statistic, respectively. The red, purple, and blue points represent the windows that overlap with *FGGY*, *ADH1A-ADH1B*, and *NELL1*, respectively.

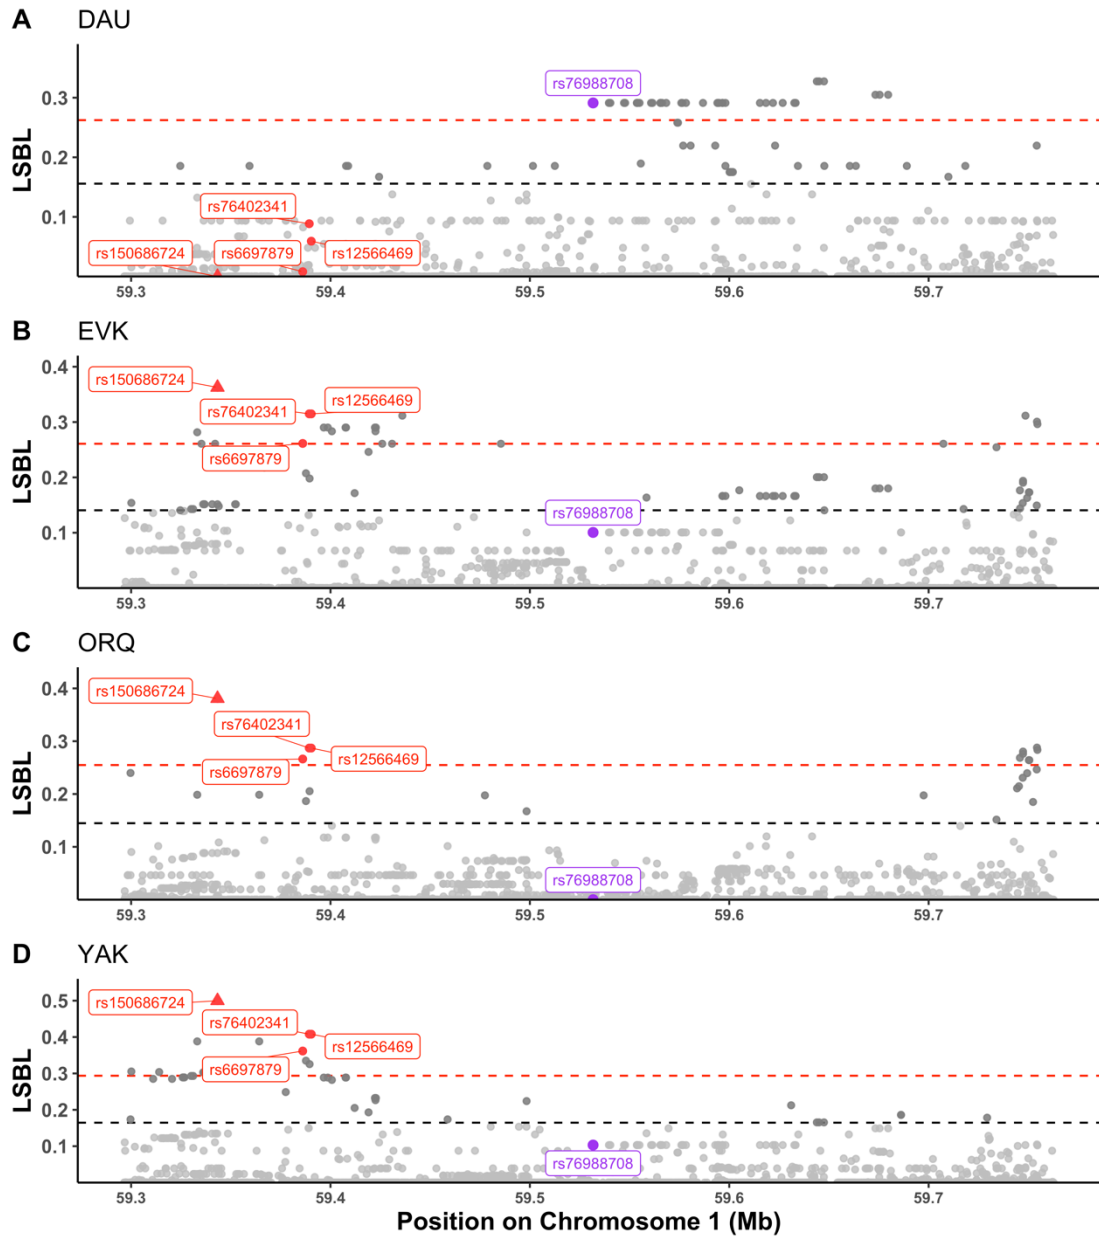

**Fig. S19. LSBL local distribution within *FGGY* in M.AR populations and YAK.**

For each M.AR population and YAK, LSBL was calculated using HAN and the French population as reference populations. The black and red dashed lines indicate the top 1% and 0.1% threshold of the empirical distribution of LSBL, respectively. Each point represents one SNP, and red dots represent four extremely highly differentiated SNPs in EVK (B), ORQ (C), and YAK (D), of which rs150686724 (the red triangle) showed the highest LSBL values and the strongest selection signals as evidenced by *RELATE*. However, in DAU (A), rs76988708 (the purple dot) showed the strongest selection signal.



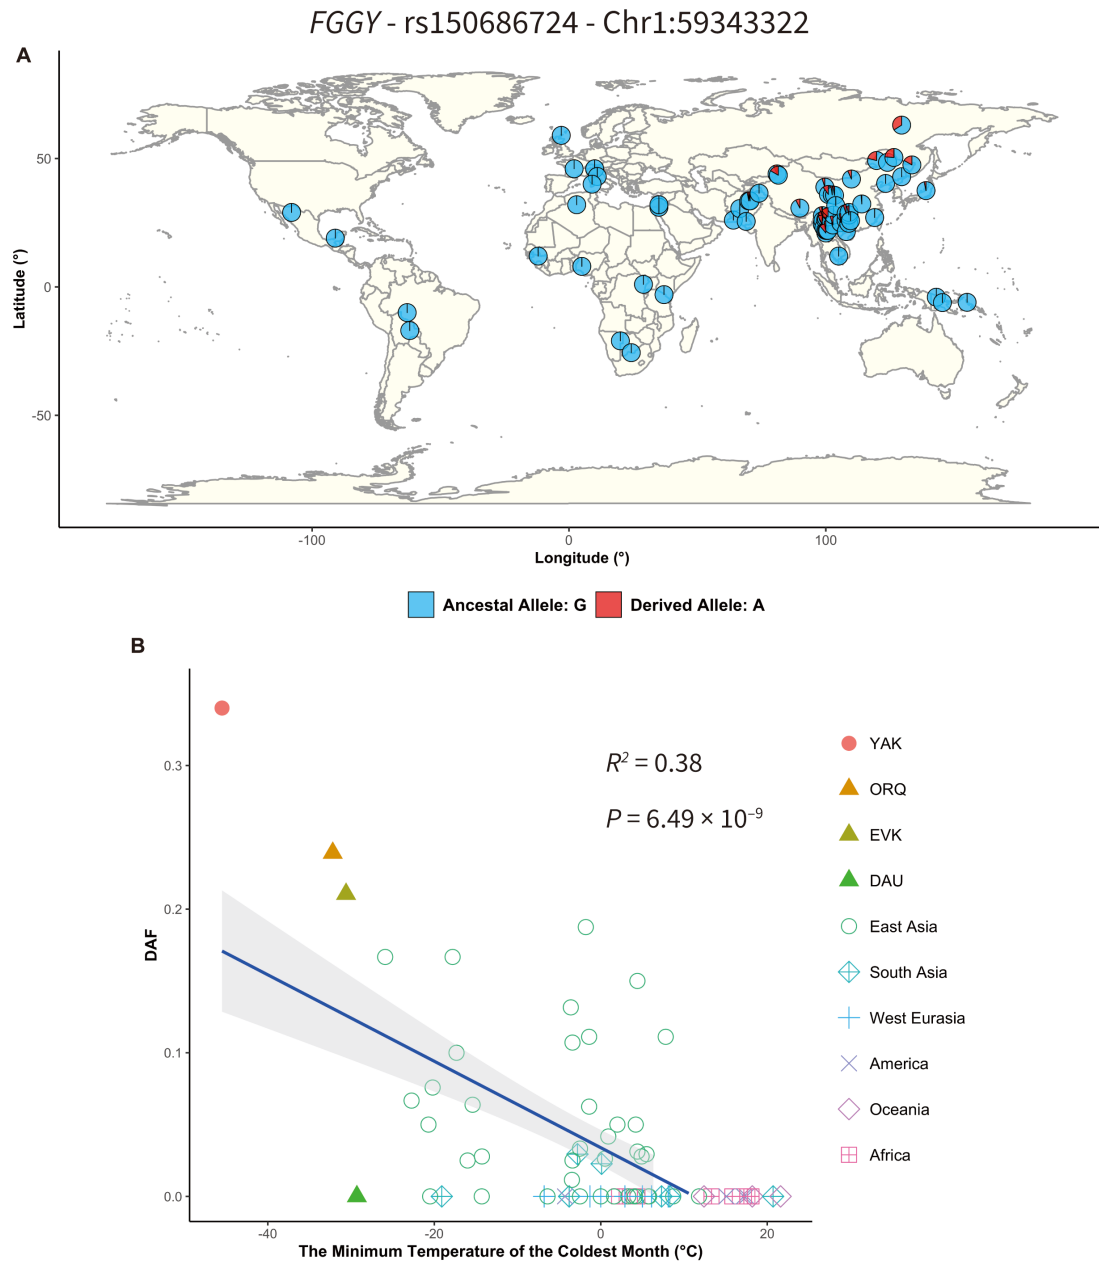

**Fig. S20. Allele frequency of *FGGY*-rs150686724 in global populations and its correlation with temperature.**

A: Distribution of the allele frequency of rs150686724 in global populations.

B: Correlation between the DAF of rs150686724 and the minimum temperature of the coldest month across all sampled populations.

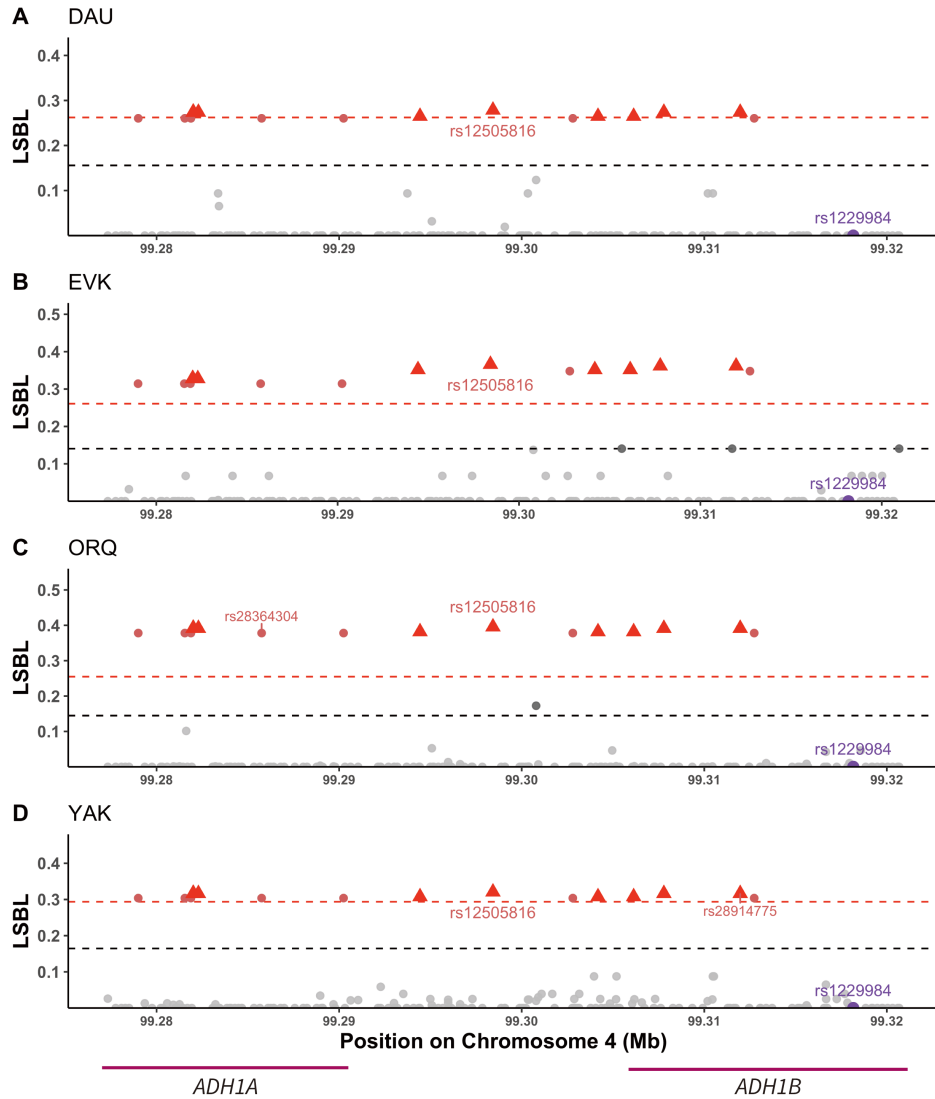

**Fig. S21. LSBL local distribution within *ADH1A-ADH1B* in M.AR populations and YAK.**

For each M.AR population and YAK, LSBL was calculated using HAN and the French population as reference populations. The black and red dashed lines indicate the top 1% and 0.1% threshold of the empirical distribution of LSBL, respectively. Each point represents one SNP. Red triangles represent nine extremely highly differentiated SNPs in both M.AR and YAK, of which rs12505816, located in the intergenic region, showed the highest LSBL values. The strongest selection signals evidenced by *RELATE* were revealed at rs12505816 in DAU and EVK, rs28364304 in ORQ, and rs28914775 in YAK, respectively. In addition, red dots represent the other seven extremely highly differentiated SNPs in EVK (B), ORQ (C), and YAK (D), and highly differentiated SNPs in DAU (A). The purple dot represents rs1229984.

**B**

Map showing the distribution of 40 populations in East Asia, plotted by Latitude (°) and Longitude (°). Each population is represented by a pie chart indicating the proportion of three genetic components (red, blue, and yellow).

Populations labeled include: Tibetan, Uyghur, Xibo, Tubalar, Mongol, Yuguir, Chukchi, Eskimo, YAK, EVK, DAU, ORO, Uchi, Bezhen, Chaoshan, Man, Japanese, HAN, Sibo, Dongxiang, Salar, Tu, Yugur, Qiang, Yi, Tujia, Miao, Shu, Bai, Gelao, Mosuo, Pumi, Druha, Lisu, Nu, Jingpo, Deang, Naxi, Achang, Wa, Dai, Lahu, Jin, Mulam, Khasi, Juiho, and Blang.

Allele frequency distribution of rs12505816 in the context of (A) global populations and (B) populations in East Asia and Siberia.

**A**

World map showing the geographic distribution of 100 sampling locations. The map displays Latitude (°) on the Y-axis (ranging from -50 to 50) and Longitude (°) on the X-axis (ranging from -100 to 100). Sampling locations are marked by pie charts, where the color of the pie chart indicates the group (red or blue) and the size of the pie chart indicates the number of samples collected at that location. The map shows a high density of sampling locations in East Asia, particularly in China, and a more dispersed distribution across other regions including North America, Central America, South America, Europe, Africa, and Australia.

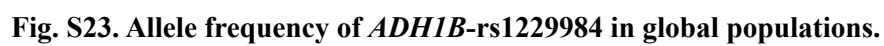

Allele frequency distribution of rs1229984 in the context of (A) global populations and (B) populations in East Asia and Siberia.

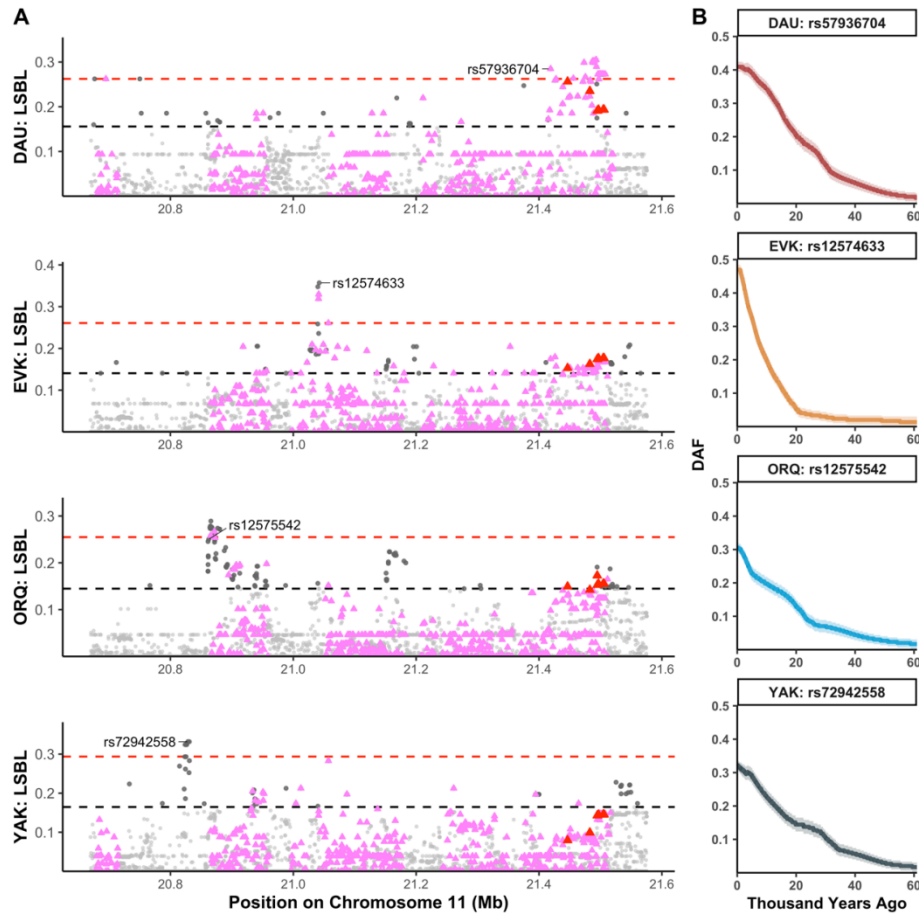

**Fig. S24. LSBL local distribution and allele frequency trajectories of *NELL1*.**

A: Local distribution of LSBL values within *NELL1* in each M.AR population and YAK. For each M.AR population and YAK, LSBL was calculated using HAN and the French population as reference populations. The black and red dashed lines indicate the top 1% and 0.1% threshold of the empirical distribution of LSBL, respectively. Each point represents one SNP, and each purple triangle represents one aAIM. No overlap was observed among the extremely highly differentiated SNPs across the four populations; thus, the strongest selection signals evidenced by *RELATE* were revealed at different variants in each population. However, upon relaxing the criteria, 16 highly differentiated SNPs (red triangles) were identified among three M.AR populations, which were also aAIMs.

B: The allele frequency trajectories across time in each M.AR population and YAK. Based on the *RELATE* results, rs57936704, rs12574633, rs12575542, and rs72942558 showed the strongest selection signal in DAU, EVK, ORQ, and YAK, respectively. The solid line indicates the frequency trajectory of these putative adaptive alleles, as inferred by *CLUES*, and the colored region indicates the 95% CI.

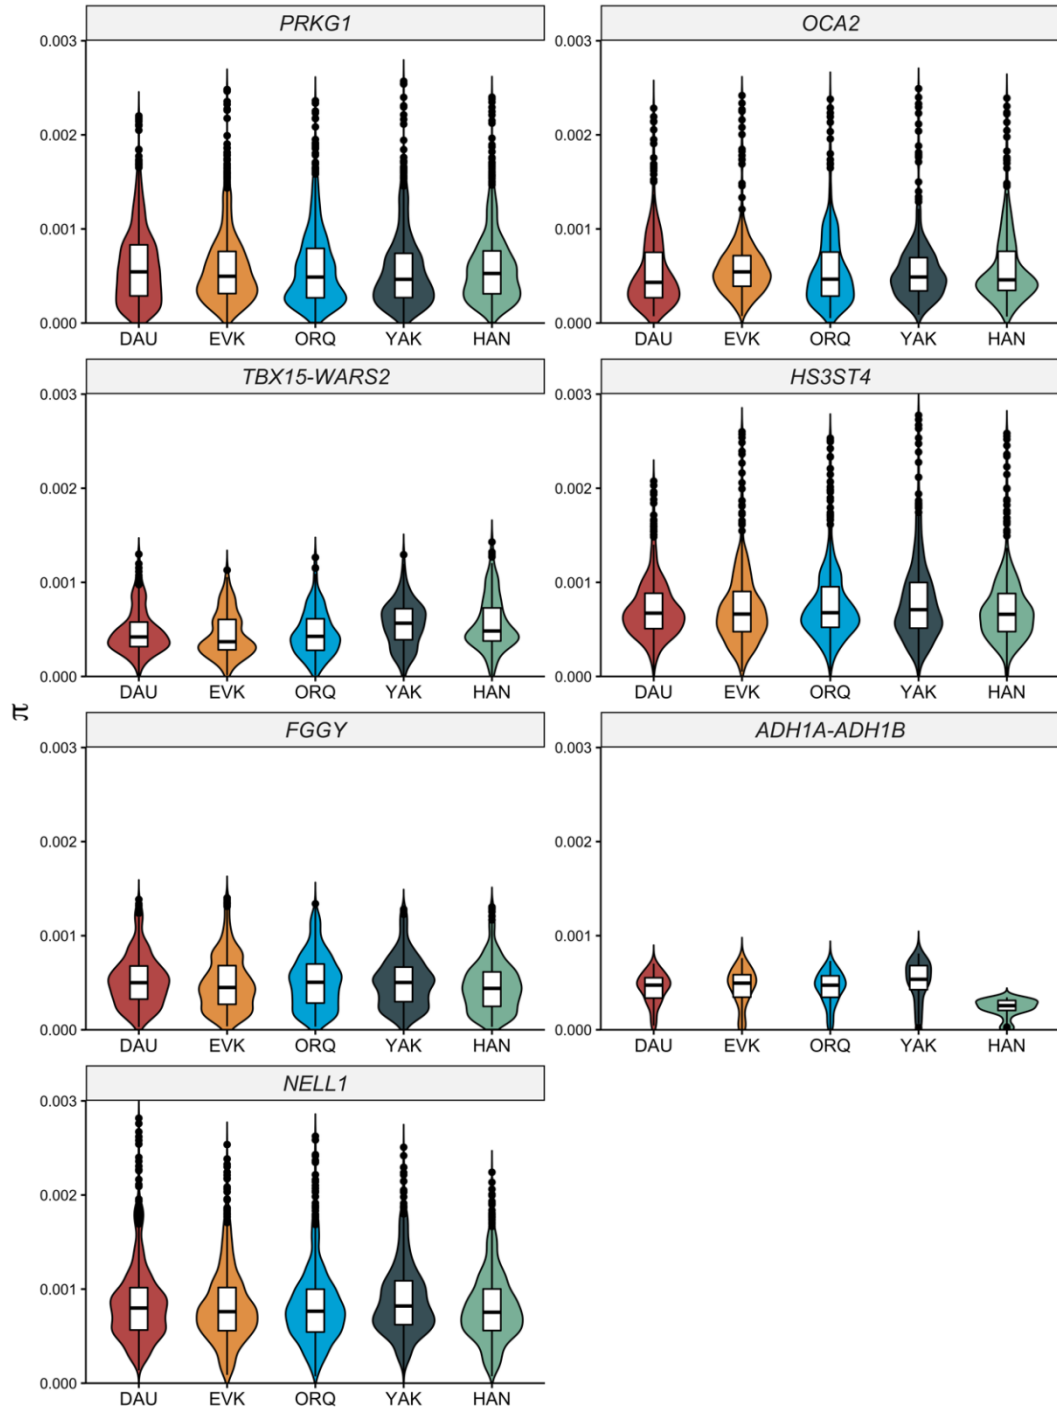

**Fig. S25. Genetic diversity of CAR genes with selection signals measured by nucleotide differences.**

Shown are nucleotide differences ( $\pi$ ) of seven CAR genomic regions with selection signals identified in M.AR populations and YAK. For each genomic region, nucleotide differences of three M.AR populations, YAK, and HAN are presented. The higher  $\pi$  value indicates the higher genetic diversity of the genomic region.

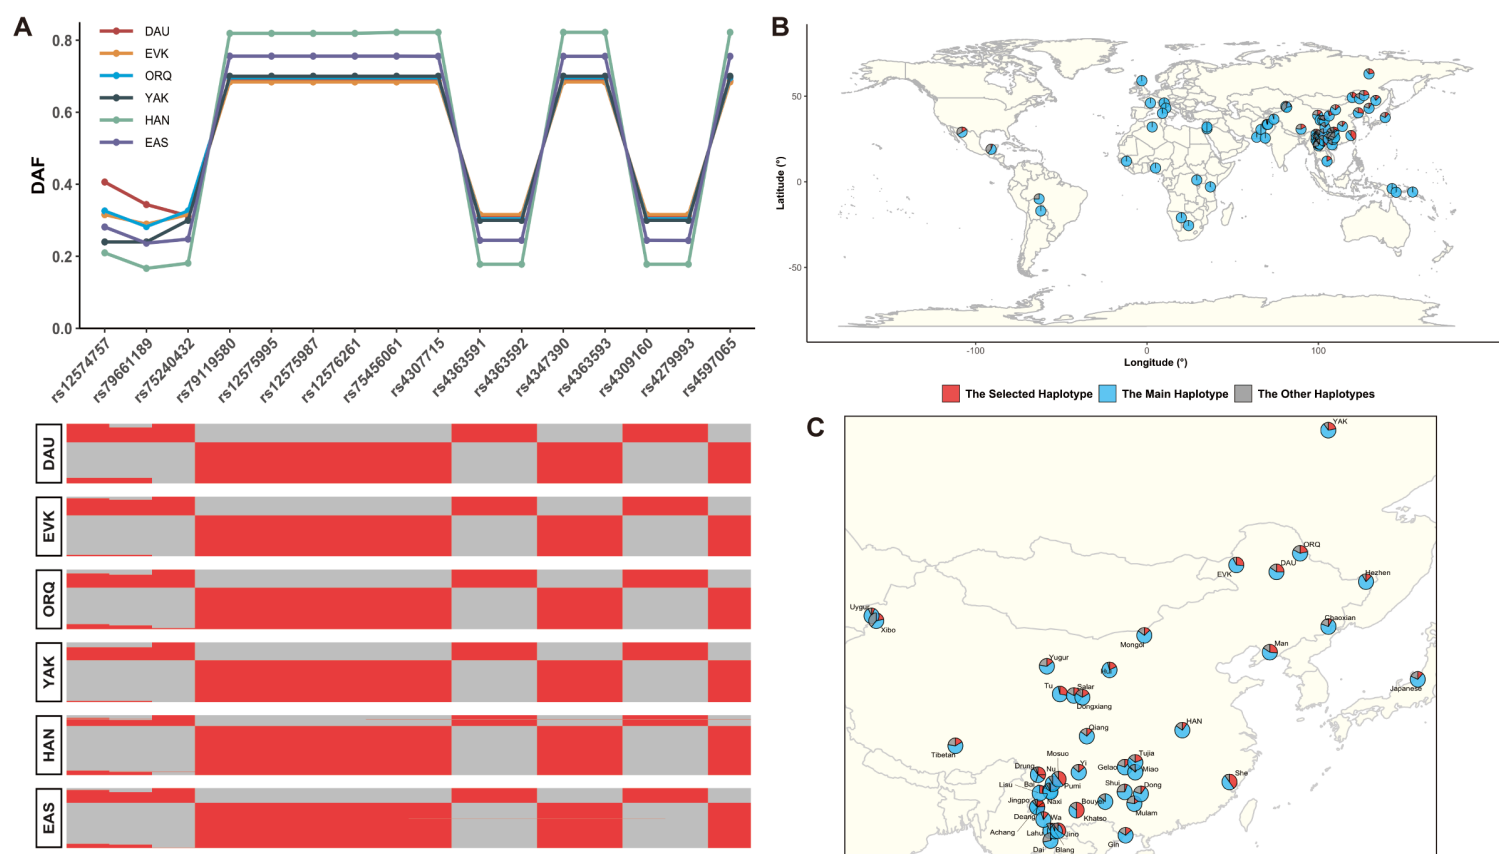

**Fig. S26. Haplotype pattern and allele frequency of *NELL1*.**

A: The haplotype consisted of 16 highly differentiated SNPs in three M.AR populations. The upper panel shows the DAF value of each variant in each population. The lower panel shows the haplotype distribution in each population, and red and grey represent the derived and ancestral alleles, respectively. EAS: East Asians except M.AR and HAN.

B and C: The frequency distributions of the haplotype in the context of global (B) and East Asia and Siberia (C).

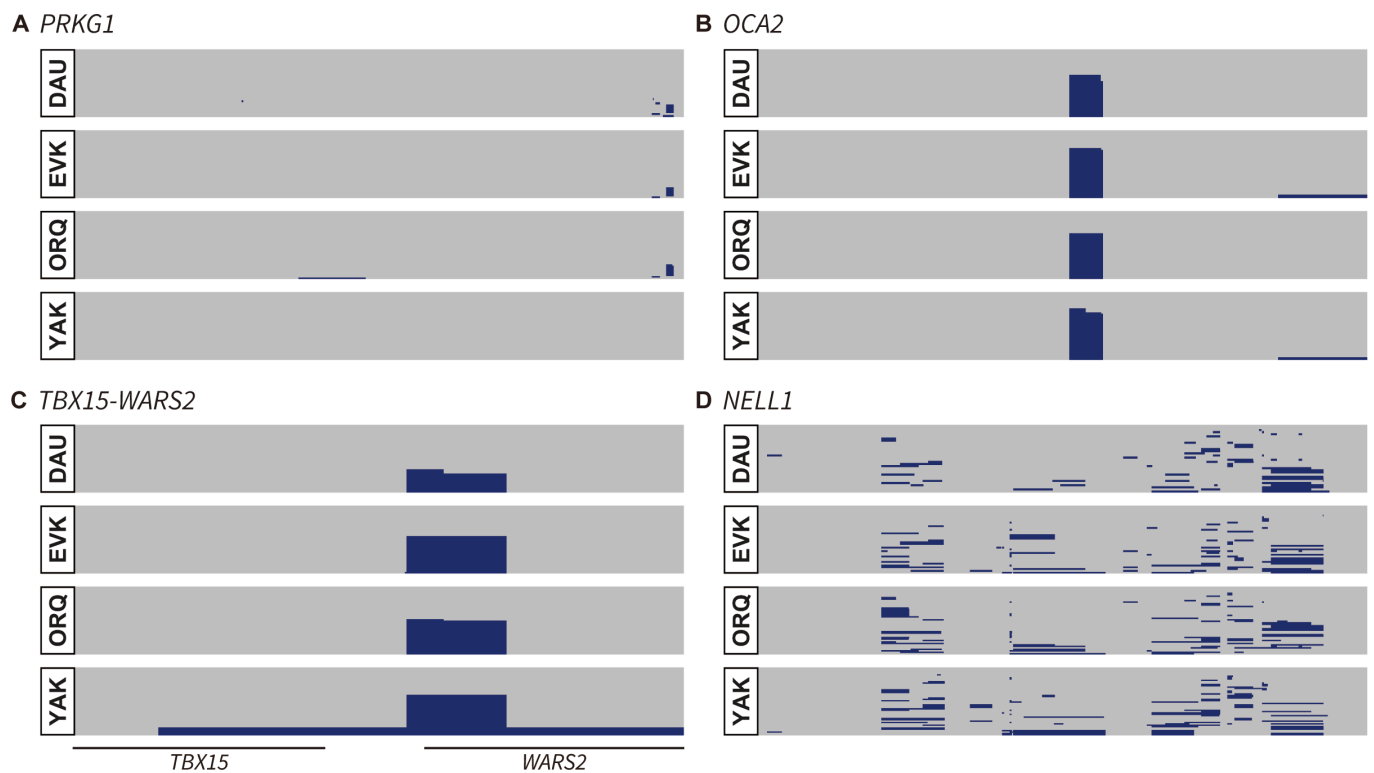

**Fig. S27. Detected archaic segments within putative adaptive genes with archaic introgression signals in M.AR populations and YAK.**

Detected archaic segments within *PRKG1* (A), *OCA2* (B), *TBX15-WARS2* (C), and *NELL1* (D) in three M.AR populations and YAK using *ArchaicSeeker* 2.0. Blue and grey represent archaic and non-archaic segments, respectively.



**Table S3. mtDNA and NRY haplogroups of M.AR samples in this study.**

| <b>Sample ID</b> | <b>Population</b> | <b>Gender</b> | <b>mtDNA Haplogroup</b> | <b>NRY Haplogroup</b> |
|------------------|-------------------|---------------|-------------------------|-----------------------|
| AAGC032558D      | DWE               | Male          | G2a+152                 | O2a2b2a1a             |
| AAGC032559D      | DWE               | Female        | Z3d                     |                       |
| AAGC032560D      | DWE               | Male          | D4                      | N1a1a1a1a             |
| AAGC032571D      | DWE               | Female        | D4q                     |                       |
| AAGC032572D      | DWE               | Female        | F2a                     |                       |
| AAGC032665D      | DWE               | Male          | Y1                      | N1a1a1a1a3a           |
| AAGC032666D      | DWE               | Female        | Z3d                     |                       |
| AAGC032667D      | DWE               | Male          | G2a1                    | C2a1a1b1a2b           |
| AAGC032668D      | DWE               | Male          | C1a                     | O1b1a1a1a1b2a1a2a     |
| AAGC032698D      | DWE               | Female        | M7c1a1b                 |                       |
| AAGC032699D      | DWE               | Female        | Z3d                     |                       |
| AAGC032028D      | ORQ               | Female        | C4a1a+195               |                       |
| AAGC032029D      | ORQ               | Female        | D3                      |                       |
| AAGC032030D      | ORQ               | Female        | D4b1                    |                       |
| AAGC032031D      | ORQ               | Female        | D4f1                    |                       |
| AAGC032032D      | ORQ               | Male          | D3                      | C2a1a1b1a2b           |
| AAGC032033D      | ORQ               | Male          | D3                      | N1a1a1a1a             |
| AAGC032034D      | ORQ               | Female        | B4b1a3a                 |                       |
| AAGC032067D      | ORQ               | Female        | B4b1a3a                 |                       |
| AAGC032116D      | ORQ               | Male          | A12a                    | C2b1a2a2b1a2          |
| AAGC032117D      | ORQ               | Male          | D3                      | C2a1a1b1a2b           |
| AAGC032119D      | ORQ               | Female        | A12a                    |                       |
| AAGC032120D      | ORQ               | Female        | D3                      |                       |
| AAGC032121D      | ORQ               | Male          | N                       | C2a1a1b1a2b           |
| AAGC032122D      | ORQ               | Male          | F1b1e                   | C2a1a1b1a2b           |
| AAGC032123D      | ORQ               | Female        | D4b2b2c                 |                       |
| AAGC032124D      | ORQ               | Male          | A12a                    | C2a1a1b1a2b           |
| AAGC032125D      | ORQ               | Male          | G2b1a2                  | C2a1a1b1a2b           |
| AAGC032126D      | ORQ               | Male          | M7b1a1+(16192)          | C2a1a1b1a2b           |
| AAGC032127D      | ORQ               | Male          | G2b1a2                  | C2a1a1b1a2b           |
| AAGC032128D      | ORQ               | Male          | M11a                    | C2b1b2                |
| AAGC032129D      | ORQ               | Male          | M11a                    | C2b1b2                |
| AAGC032130D      | ORQ               | Male          | D4                      | C2a1a1b1a2b           |
| AAGC032312D      | ORQ               | Female        | C4b                     |                       |
| AAGC032313D      | ORQ               | Female        | D412a1                  |                       |
| AAGC032314D      | ORQ               | Male          | D3                      | N1a1a1a1a             |
| AAGC032332D      | ORQ               | Female        | G2b1a2                  |                       |

|             |     |        |           |                    |
|-------------|-----|--------|-----------|--------------------|
| AAGC032333D | ORQ | Female | B4d1'2'3  |                    |
| AAGC032334D | ORQ | Female | C4a1a+195 |                    |
| AAGC032335D | ORQ | Male   | F1c1a1    | C2a1a1b1a2b        |
| AAGC032584D | ORQ | Female | D4l1      |                    |
| AAGC032616D | ORQ | Male   | C5b1a     | O2a1b1a1a1a1e1a2a  |
| AAGC032113D | EVK | Male   | C4b1      | O2a2b1a2a1a1a1     |
| AAGC032114D | EVK | Male   | J1c4      | O1b1a1a1a1b2a1a2a  |
| AAGC032115D | EVK | Female | D4b2b     |                    |
| AAGC032358D | EVK | Female | C4b3a     |                    |
| AAGC032359D | EVK | Male   | B5b2      | C2a1a1b1a2b        |
| AAGC032382D | EVK | Male   | B4b1c2    | C2a1a1b1a2b        |
| AAGC032580D | EVK | Male   | D4i2      | O2a2b1a2a1a1b1b2b1 |
| AAGC032581D | EVK | Male   | H4a1a1a   | C2a1a1b1a2b        |
| AAGC032582D | EVK | Male   | B4b1c2    | O2a2b1a1a1c1a1a    |
| AAGC032583D | EVK | Female | D4o2a     |                    |
| AAGC032610D | EVK | Female | D4        |                    |
| AAGC032611D | EVK | Male   | H4a1a1a   | O2a2b1a2a1a1b1b2b1 |
| AAGC032612D | EVK | Female | G2b1a2    |                    |
| AAGC032613D | EVK | Female | G1a1      |                    |
| AAGC032614D | EVK | Male   | A12a      | C2a1a1b1a2b        |
| AAGC032615D | EVK | Female | B4c1c1    |                    |
| AAGC032706D | EVK | Male   | B4c1c     | O2a2b1a2a1a1b1b2b1 |
| AAGC032707D | EVK | Female | C4a1a3b   |                    |
| AAGC032708D | EVK | Female | H28a      |                    |
| AAGC032730D | EVK | Female | D4b2b2b   |                    |

**Table S4. Reported genes related to cold adaptation in Siberian, Inuit, and Alaskan populations.**

| Gene                     | Position (GRCh38)        | Function Description             | Selected Population                | Evidence of Positive Selection       | Citation                                     |
|--------------------------|--------------------------|----------------------------------|------------------------------------|--------------------------------------|----------------------------------------------|
| <i>PLA2G2A</i>           | Chr1:19975431-19980434   | Lipid Metabolism                 | Siberians                          | PBS                                  | Hallmark et al. 2019                         |
| <i>TBX15</i>             | Chr1:118883047-118989510 | Adipocyte Differentiation        | Greenlandic Inuit                  | PBS                                  | Fumagalli et al. 2015                        |
| <i>WARS2</i>             | Chr1:119031216-119140672 | Energy Metabolism                | Greenlandic Inuit                  | PBS                                  | Fumagalli et al. 2015                        |
| <i>KCNHI</i>             | Chr1:210678314-211134148 | Adipose Tissue Production        | Alaskans                           | PBS, iHS                             | Reynolds et al. 2019                         |
| <i>THADA</i>             | Chr2:43230851-43596038   | Energy Regulation and Metabolism | Southern Siberians                 | PBS, iHS, XP-EHH                     | Cardona et al. 2014                          |
| <i>PRKG1</i>             | Chr10:50990888-52298350  | Smooth Muscle Contraction        | Central and Northeastern Siberians | PBS, iHS, XP-EHH                     | Cardona et al. 2014                          |
| <i>FADS1-FADS2-FADS3</i> | Chr11:61799627-61892224  | Fatty Acid Metabolism            | Greenlandic Inuit                  | PBS                                  | Fumagalli et al. 2015                        |
| <i>LRP5</i>              | Chr11:68298412-68449275  | Energy Regulation and Metabolism | Northeastern Siberians             | PBS, iHS, XP-EHH                     | Cardona et al. 2014                          |
| <i>CPT1A</i>             | Chr11:68754620-68844277  | Energy Regulation and Metabolism | Northeastern Siberians             | PBS, iHS, XP-EHH;<br>iHS, Tajima's D | Cardona et al. 2014;<br>Clemente et al. 2014 |
| <i>OCA2</i>              | Chr15:27719008-28099315  | Melanin Production               | Alaskans                           | PBS, iHS                             | Reynolds et al. 2019                         |
| <i>PLIN1</i>             | Chr15:89664367-89679367  | Lipid Metabolism                 | Siberians                          | PBS                                  | Hallmark et al. 2019                         |
| <i>HS3ST4</i>            | Chr16:25691959-26137685  | Heparan Sulfate Biosynthesis     | Alaskans                           | PBS, iHS                             | Reynolds et al. 2019                         |
| <i>FN3KRP</i>            | Chr17:82716706-82728013  | Energy Metabolism                | Greenlandic Inuit                  | PBS                                  | Fumagalli et al. 2015                        |
| <i>ANGPTL8</i>           | Chr19:11239619-11241943  | Lipid Metabolism                 | Siberians                          | PBS                                  | Hallmark et al. 2019                         |

The following supplementary tables were provided as spreadsheets:

**Table S1. Information of populations analyzed in this study.**

**Table S2. Information of samples used in this study.**

**Table S5. Putative adaptive variants within reported CAR genes with significant selection signatures in M.A.R.**

**Table S6. Putative adaptive variants within newly identified CAR genes.**
