# Supplementary material for: Genomic insights into the cold adaptation of human populations in the Amur River Basin
Source: Research Square preprint supplement (doi:10.21203/rs.3.rs-4637970/v1), 2024-08-06
Supplement: Supplementary file 1 [file c26fc4a838ea8d942a78e0ce.xlsx]

## Sheet: Table S1
Table S1. Information of populations analyzed in this study.
Region	Population	Sample Size	Latitude	Longitude	Minimum Temperature #	Source
East Asia	ORQ	22	50.4	126.5	-32.2	This Study
	EVK	19	49.2122	119.736	-30.6
	DAU	10	48.5	124	-29.3
	Hezhen	8	47.5	133.5	-25.9	Chinese Pangenome Consortium
	Mongol	20	42	109.963	-22.7333
	Tu	19	36	101	-17.332
	Uygur	84	44	81	-15.4
	HAN	131	32.3	114	-3.46667
	Yi	8	28	103	-2.5
	Naxi	9	26	100	-1.4
	Tujia	16	29	109	0
	Miao	20	28	109	0.9
	She	10	27	119	1.6
	Lahu	9	22	100	5.5
	Yugur	20	38.8378	99.6141	-20.7
	Chaoxian	18	42.9068	129.514	-20.5
	Tibetan	33	30.7	89.9	-20.2
	Salar	20	35.8473	102.487	-16
	Man	19	40.28	123.289	-14.3
	Dongxiang	18	35.6647	103.39	-14.2778
	Qiang	20	31.682	103.854	-6.4
	Mosuo	19	27.2818	100.851	-3.6
	Nu	20	27.7409	98.6658	-3.4
	Drung	14	27.7409	98.6658	-3.4
	Pumi	16	26.8215	100.237	-1.8
	Bai	18	26.1083	99.95	-1.4
	Lisu	19	25.851	98.8543	0.5
	Gelao	20	28.5223	107.889	2
	Shui	16	25.9856	107.875	3.3
	Dong	20	25.7843	109.604	3.8
	Wa	18	23.1482	99.2455	4.1
	Khatso	10	24.1136	102.766	4.2
	Achang	20	24.4337	98.59	4.4
	Jingpo	16	24.4337	98.5886	4.4
	Deang	14	24.4337	98.59	4.4
	Bouyei	18	24.9838	105.812	4.9
	Mulam	9	24.7792	108.908	5.7
	Blang	16	21.9617	100.449	5.8
	Jino	19	22.0107	100.8	8.7
	Gin	18	21.5471	107.972	11.8
	Hui	36	38.47	106.27	-14.8
	ORQ	1	50.4	126.5	-32.2	HGDP
	DAU	6	48.5	124	-29.3
	Hezhen	4	47.5	133.5	-25.9
	Mongol	10	42	109.963	-22.7333
	Tu	6	36	101	-17.332
	Uygur	10	44	81	-15.4
	HAN	43	32.3	114	-3.46667
	Yi	10	28	103	-2.5
	Naxi	7	26	100	-1.4
	Tujia	8	29	109	0
	Miao	4	28	109	0.9
	She	5	27	119	1.6
	Lahu	8	22	100	5.5
Siberia	YAK	25	63	129.5	-45.5
	Chukchi	19	69.5	168.8	-42	Human Origin
	Yukagir	18	68.6	153	-40.1
	Eskimo	19	66	169.7	-35.6
	Ulchi	24	52.2	140.4	-26.4
	Tubalar	18	51.1	87	-24.3
South Asia	Burusho	22	36.5	74	-19.1	HGDP
	Brahui	23	30.5	66.5	-3.8
	Balochi	22	30.5	66.5	-3.8
	Hazara	17	33.5	70	-2.8
	Pathan	22	33.5	70.5	0.1
	Makrani	23	26	64	7.3
	Sindhi	22	25.5	69	8.3
	Cambodian	9	12	105	20.7
West Eurasia	Italian	10	46	10	-6.8
	French	46	46	2	-1.3
	Orcadian	13	59	-3	0
	Tuscan	6	43	11	2.9
	Sardinian	24	40	9	5
	Bedouin	44	31	35	6.1
	Palestinian	41	32	35	8.1
	Druze	39	32	35	8.1
America	Pima	9	29	-108	-4.3
	Surui	3	-17	-62	15.1
	Maya	19	19	-91	17.2
	Karitiana	4	-10	-63	17.5
Oceania	PapuanHighlands	6	-6.1	145.4	12.4
	Bougainville	8	-6	155	18.2
	PapuanSepik	8	-4	143	21.6
Africa	BantuSouthAfrica	4	-25.6	24.25	2.2
	Mozabite	25	32	3	3.5
	San	2	-21	20	4.4
	BantuKenya	8	-3	37	13.3
	Mandenka	19	12	-12	15.8
	Mbuti	12	1	29	17.6
	Yoruba	18	8	5	18.1
# The value of minimum temperature in the coldest month of the region abstracted from WorldClim.

## Sheet: Table S2
Table S2. Information of samples used in this study.
SampleID	Population	Region	Data	Joint Calling	Reference
AAGC032558D	DAU	East Asia	NGS	Y	This Study
AAGC032560D	DAU	East Asia	NGS	Y	This Study
AAGC032571D	DAU	East Asia	NGS	Y	This Study
AAGC032572D	DAU	East Asia	NGS	Y	This Study
AAGC032665D	DAU	East Asia	NGS	Y	This Study
AAGC032666D	DAU	East Asia	NGS	Y	This Study
AAGC032667D	DAU	East Asia	NGS	Y	This Study
AAGC032668D	DAU	East Asia	NGS	Y	This Study
AAGC032698D	DAU	East Asia	NGS	Y	This Study
AAGC032699D	DAU	East Asia	NGS	Y	This Study
HGDP01214	DAU	East Asia	NGS	Y	HGDP
HGDP01215	DAU	East Asia	NGS	Y	HGDP
HGDP01218	DAU	East Asia	NGS	Y	HGDP
HGDP01219	DAU	East Asia	NGS	Y	HGDP
HGDP01220	DAU	East Asia	NGS	Y	HGDP
HGDP01222	DAU	East Asia	NGS	Y	HGDP
AAGC032113D	EVK	East Asia	NGS	Y	This Study
AAGC032114D	EVK	East Asia	NGS	Y	This Study
AAGC032115D	EVK	East Asia	NGS	Y	This Study
AAGC032358D	EVK	East Asia	NGS	Y	This Study
AAGC032359D	EVK	East Asia	NGS	Y	This Study
AAGC032382D	EVK	East Asia	NGS	Y	This Study
AAGC032580D	EVK	East Asia	NGS	Y	This Study
AAGC032581D	EVK	East Asia	NGS	Y	This Study
AAGC032582D	EVK	East Asia	NGS	Y	This Study
AAGC032583D	EVK	East Asia	NGS	Y	This Study
AAGC032611D	EVK	East Asia	NGS	Y	This Study
AAGC032612D	EVK	East Asia	NGS	Y	This Study
AAGC032613D	EVK	East Asia	NGS	Y	This Study
AAGC032614D	EVK	East Asia	NGS	Y	This Study
AAGC032615D	EVK	East Asia	NGS	Y	This Study
AAGC032706D	EVK	East Asia	NGS	Y	This Study
AAGC032707D	EVK	East Asia	NGS	Y	This Study
AAGC032708D	EVK	East Asia	NGS	Y	This Study
AAGC032730D	EVK	East Asia	NGS	Y	This Study
AAGC032028D	ORQ	East Asia	NGS	Y	This Study
AAGC032029D	ORQ	East Asia	NGS	Y	This Study
AAGC032030D	ORQ	East Asia	NGS	Y	This Study
AAGC032031D	ORQ	East Asia	NGS	Y	This Study
AAGC032032D	ORQ	East Asia	NGS	Y	This Study
AAGC032067D	ORQ	East Asia	NGS	Y	This Study
AAGC032116D	ORQ	East Asia	NGS	Y	This Study
AAGC032117D	ORQ	East Asia	NGS	Y	This Study
AAGC032122D	ORQ	East Asia	NGS	Y	This Study
AAGC032123D	ORQ	East Asia	NGS	Y	This Study
AAGC032124D	ORQ	East Asia	NGS	Y	This Study
AAGC032125D	ORQ	East Asia	NGS	Y	This Study
AAGC032126D	ORQ	East Asia	NGS	Y	This Study
AAGC032129D	ORQ	East Asia	NGS	Y	This Study
AAGC032312D	ORQ	East Asia	NGS	Y	This Study
AAGC032313D	ORQ	East Asia	NGS	Y	This Study
AAGC032314D	ORQ	East Asia	NGS	Y	This Study
AAGC032332D	ORQ	East Asia	NGS	Y	This Study
AAGC032333D	ORQ	East Asia	NGS	Y	This Study
AAGC032335D	ORQ	East Asia	NGS	Y	This Study
AAGC032584D	ORQ	East Asia	NGS	Y	This Study
AAGC032616D	ORQ	East Asia	NGS	Y	This Study
HGDP01205	ORQ	East Asia	NGS	Y	HGDP
HGDP01405	BantuKenya	Africa	NGS	Y	HGDP
HGDP01406	BantuKenya	Africa	NGS	Y	HGDP
HGDP01408	BantuKenya	Africa	NGS	Y	HGDP
HGDP01411	BantuKenya	Africa	NGS	Y	HGDP
HGDP01415	BantuKenya	Africa	NGS	Y	HGDP
HGDP01416	BantuKenya	Africa	NGS	Y	HGDP
HGDP01418	BantuKenya	Africa	NGS	Y	HGDP
HGDP01419	BantuKenya	Africa	NGS	Y	HGDP
HGDP00993	BantuSouthAfrica	Africa	NGS	Y	HGDP
HGDP00994	BantuSouthAfrica	Africa	NGS	Y	HGDP
HGDP01031	BantuSouthAfrica	Africa	NGS	Y	HGDP
HGDP01033	BantuSouthAfrica	Africa	NGS	Y	HGDP
HGDP00904	Mandenka	Africa	NGS	Y	HGDP
HGDP00905	Mandenka	Africa	NGS	Y	HGDP
HGDP00906	Mandenka	Africa	NGS	Y	HGDP
HGDP00907	Mandenka	Africa	NGS	Y	HGDP
HGDP00908	Mandenka	Africa	NGS	Y	HGDP
HGDP00909	Mandenka	Africa	NGS	Y	HGDP
HGDP00910	Mandenka	Africa	NGS	Y	HGDP
HGDP00911	Mandenka	Africa	NGS	Y	HGDP
HGDP00912	Mandenka	Africa	NGS	Y	HGDP
HGDP00914	Mandenka	Africa	NGS	Y	HGDP
HGDP00916	Mandenka	Africa	NGS	Y	HGDP
HGDP00917	Mandenka	Africa	NGS	Y	HGDP
HGDP00918	Mandenka	Africa	NGS	Y	HGDP
HGDP00919	Mandenka	Africa	NGS	Y	HGDP
HGDP01200	Mandenka	Africa	NGS	Y	HGDP
HGDP01201	Mandenka	Africa	NGS	Y	HGDP
HGDP01202	Mandenka	Africa	NGS	Y	HGDP
HGDP01283	Mandenka	Africa	NGS	Y	HGDP
HGDP01285	Mandenka	Africa	NGS	Y	HGDP
HGDP00449	Mbuti	Africa	NGS	Y	HGDP
HGDP00450	Mbuti	Africa	NGS	Y	HGDP
HGDP00462	Mbuti	Africa	NGS	Y	HGDP
HGDP00463	Mbuti	Africa	NGS	Y	HGDP
HGDP00467	Mbuti	Africa	NGS	Y	HGDP
HGDP00471	Mbuti	Africa	NGS	Y	HGDP
HGDP00474	Mbuti	Africa	NGS	Y	HGDP
HGDP00476	Mbuti	Africa	NGS	Y	HGDP
HGDP00478	Mbuti	Africa	NGS	Y	HGDP
HGDP00982	Mbuti	Africa	NGS	Y	HGDP
HGDP00984	Mbuti	Africa	NGS	Y	HGDP
HGDP01081	Mbuti	Africa	NGS	Y	HGDP
HGDP01254	Mozabite	Africa	NGS	Y	HGDP
HGDP01255	Mozabite	Africa	NGS	Y	HGDP
HGDP01256	Mozabite	Africa	NGS	Y	HGDP
HGDP01257	Mozabite	Africa	NGS	Y	HGDP
HGDP01258	Mozabite	Africa	NGS	Y	HGDP
HGDP01259	Mozabite	Africa	NGS	Y	HGDP
HGDP01260	Mozabite	Africa	NGS	Y	HGDP
HGDP01261	Mozabite	Africa	NGS	Y	HGDP
HGDP01262	Mozabite	Africa	NGS	Y	HGDP
HGDP01263	Mozabite	Africa	NGS	Y	HGDP
HGDP01264	Mozabite	Africa	NGS	Y	HGDP
HGDP01265	Mozabite	Africa	NGS	Y	HGDP
HGDP01266	Mozabite	Africa	NGS	Y	HGDP
HGDP01267	Mozabite	Africa	NGS	Y	HGDP
HGDP01268	Mozabite	Africa	NGS	Y	HGDP
HGDP01269	Mozabite	Africa	NGS	Y	HGDP
HGDP01270	Mozabite	Africa	NGS	Y	HGDP
HGDP01271	Mozabite	Africa	NGS	Y	HGDP
HGDP01272	Mozabite	Africa	NGS	Y	HGDP
HGDP01273	Mozabite	Africa	NGS	Y	HGDP
HGDP01275	Mozabite	Africa	NGS	Y	HGDP
HGDP01276	Mozabite	Africa	NGS	Y	HGDP
HGDP01277	Mozabite	Africa	NGS	Y	HGDP
HGDP01280	Mozabite	Africa	NGS	Y	HGDP
HGDP01282	Mozabite	Africa	NGS	Y	HGDP
HGDP00992	San	Africa	NGS	Y	HGDP
HGDP01029	San	Africa	NGS	Y	HGDP
HGDP00920	Yoruba	Africa	NGS	Y	HGDP
HGDP00924	Yoruba	Africa	NGS	Y	HGDP
HGDP00925	Yoruba	Africa	NGS	Y	HGDP
HGDP00926	Yoruba	Africa	NGS	Y	HGDP
HGDP00929	Yoruba	Africa	NGS	Y	HGDP
HGDP00930	Yoruba	Africa	NGS	Y	HGDP
HGDP00931	Yoruba	Africa	NGS	Y	HGDP
HGDP00933	Yoruba	Africa	NGS	Y	HGDP
HGDP00934	Yoruba	Africa	NGS	Y	HGDP
HGDP00935	Yoruba	Africa	NGS	Y	HGDP
HGDP00937	Yoruba	Africa	NGS	Y	HGDP
HGDP00938	Yoruba	Africa	NGS	Y	HGDP
HGDP00939	Yoruba	Africa	NGS	Y	HGDP
HGDP00940	Yoruba	Africa	NGS	Y	HGDP
HGDP00941	Yoruba	Africa	NGS	Y	HGDP
HGDP00942	Yoruba	Africa	NGS	Y	HGDP
HGDP00943	Yoruba	Africa	NGS	Y	HGDP
HGDP00944	Yoruba	Africa	NGS	Y	HGDP
HGDP01001	Karitiana	America	NGS	Y	HGDP
HGDP01009	Karitiana	America	NGS	Y	HGDP
HGDP01014	Karitiana	America	NGS	Y	HGDP
HGDP01019	Karitiana	America	NGS	Y	HGDP
HGDP00854	Maya	America	NGS	Y	HGDP
HGDP00856	Maya	America	NGS	Y	HGDP
HGDP00858	Maya	America	NGS	Y	HGDP
HGDP00859	Maya	America	NGS	Y	HGDP
HGDP00860	Maya	America	NGS	Y	HGDP
HGDP00861	Maya	America	NGS	Y	HGDP
HGDP00862	Maya	America	NGS	Y	HGDP
HGDP00863	Maya	America	NGS	Y	HGDP
HGDP00864	Maya	America	NGS	Y	HGDP
HGDP00865	Maya	America	NGS	Y	HGDP
HGDP00868	Maya	America	NGS	Y	HGDP
HGDP00869	Maya	America	NGS	Y	HGDP
HGDP00870	Maya	America	NGS	Y	HGDP
HGDP00871	Maya	America	NGS	Y	HGDP
HGDP00872	Maya	America	NGS	Y	HGDP
HGDP00873	Maya	America	NGS	Y	HGDP
HGDP00875	Maya	America	NGS	Y	HGDP
HGDP00876	Maya	America	NGS	Y	HGDP
HGDP00877	Maya	America	NGS	Y	HGDP
HGDP01037	Pima	America	NGS	Y	HGDP
HGDP01041	Pima	America	NGS	Y	HGDP
HGDP01043	Pima	America	NGS	Y	HGDP
HGDP01051	Pima	America	NGS	Y	HGDP
HGDP01055	Pima	America	NGS	Y	HGDP
HGDP01056	Pima	America	NGS	Y	HGDP
HGDP01057	Pima	America	NGS	Y	HGDP
HGDP01058	Pima	America	NGS	Y	HGDP
HGDP01059	Pima	America	NGS	Y	HGDP
HGDP00837	Surui	America	NGS	Y	HGDP
HGDP00845	Surui	America	NGS	Y	HGDP
HGDP00849	Surui	America	NGS	Y	HGDP
AAGC032064D	Achang	East Asia	NGS	Y	Chinese Pangenome Consortium
AAGC032065D	Achang	East Asia	NGS	Y	Chinese Pangenome Consortium
AAGC032463D	Achang	East Asia	NGS	Y	Chinese Pangenome Consortium
AAGC032464D	Achang	East Asia	NGS	Y	Chinese Pangenome Consortium
AAGC032465D	Achang	East Asia	NGS	Y	Chinese Pangenome Consortium
AAGC032505D	Achang	East Asia	NGS	Y	Chinese Pangenome Consortium
AAGC032506D	Achang	East Asia	NGS	Y	Chinese Pangenome Consortium
AAGC032507D	Achang	East Asia	NGS	Y	Chinese Pangenome Consortium
AAGC032575D	Achang	East Asia	NGS	Y	Chinese Pangenome Consortium
AAGC032603D	Achang	East Asia	NGS	Y	Chinese Pangenome Consortium
AAGC032605D	Achang	East Asia	NGS	Y	Chinese Pangenome Consortium
AAGC032629D	Achang	East Asia	NGS	Y	Chinese Pangenome Consortium
AAGC032630D	Achang	East Asia	NGS	Y	Chinese Pangenome Consortium
AAGC032651D	Achang	East Asia	NGS	Y	Chinese Pangenome Consortium
AAGC032652D	Achang	East Asia	NGS	Y	Chinese Pangenome Consortium
AAGC032682D	Achang	East Asia	NGS	Y	Chinese Pangenome Consortium
AAGC032683D	Achang	East Asia	NGS	Y	Chinese Pangenome Consortium
AAGC032684D	Achang	East Asia	NGS	Y	Chinese Pangenome Consortium
AAGC032721D	Achang	East Asia	NGS	Y	Chinese Pangenome Consortium
AAGC032722D	Achang	East Asia	NGS	Y	Chinese Pangenome Consortium
AAGC032134D	Bai	East Asia	NGS	Y	Chinese Pangenome Consortium
AAGC032360D	Bai	East Asia	NGS	Y	Chinese Pangenome Consortium
AAGC032361D	Bai	East Asia	NGS	Y	Chinese Pangenome Consortium
AAGC032362D	Bai	East Asia	NGS	Y	Chinese Pangenome Consortium
AAGC032364D	Bai	East Asia	NGS	Y	Chinese Pangenome Consortium
AAGC032365D	Bai	East Asia	NGS	Y	Chinese Pangenome Consortium
AAGC032383D	Bai	East Asia	NGS	Y	Chinese Pangenome Consortium
AAGC032405D	Bai	East Asia	NGS	Y	Chinese Pangenome Consortium
AAGC032406D	Bai	East Asia	NGS	Y	Chinese Pangenome Consortium
AAGC032407D	Bai	East Asia	NGS	Y	Chinese Pangenome Consortium
AAGC032408D	Bai	East Asia	NGS	Y	Chinese Pangenome Consortium
AAGC032409D	Bai	East Asia	NGS	Y	Chinese Pangenome Consortium
AAGC032439D	Bai	East Asia	NGS	Y	Chinese Pangenome Consortium
AAGC032449D	Bai	East Asia	NGS	Y	Chinese Pangenome Consortium
AAGC032544D	Bai	East Asia	NGS	Y	Chinese Pangenome Consortium
AAGC032546D	Bai	East Asia	NGS	Y	Chinese Pangenome Consortium
AAGC032585D	Bai	East Asia	NGS	Y	Chinese Pangenome Consortium
AAGC032617D	Bai	East Asia	NGS	Y	Chinese Pangenome Consortium
AAGC032069D	Blang	East Asia	NGS	Y	Chinese Pangenome Consortium
AAGC032070D	Blang	East Asia	NGS	Y	Chinese Pangenome Consortium
AAGC032071D	Blang	East Asia	NGS	Y	Chinese Pangenome Consortium
AAGC032072D	Blang	East Asia	NGS	Y	Chinese Pangenome Consortium
AAGC032074D	Blang	East Asia	NGS	Y	Chinese Pangenome Consortium
AAGC032076D	Blang	East Asia	NGS	Y	Chinese Pangenome Consortium
AAGC032141D	Blang	East Asia	NGS	Y	Chinese Pangenome Consortium
AAGC032142D	Blang	East Asia	NGS	Y	Chinese Pangenome Consortium
AAGC032350D	Blang	East Asia	NGS	Y	Chinese Pangenome Consortium
AAGC032373D	Blang	East Asia	NGS	Y	Chinese Pangenome Consortium
AAGC032374D	Blang	East Asia	NGS	Y	Chinese Pangenome Consortium
AAGC032375D	Blang	East Asia	NGS	Y	Chinese Pangenome Consortium
AAGC032376D	Blang	East Asia	NGS	Y	Chinese Pangenome Consortium
AAGC032390D	Blang	East Asia	NGS	Y	Chinese Pangenome Consortium
AAGC032499D	Blang	East Asia	NGS	Y	Chinese Pangenome Consortium
AAGC032748D	Blang	East Asia	NGS	Y	Chinese Pangenome Consortium
AAGC032013D	Bouyei	East Asia	NGS	Y	Chinese Pangenome Consortium
AAGC032140D	Bouyei	East Asia	NGS	Y	Chinese Pangenome Consortium
AAGC032316D	Bouyei	East Asia	NGS	Y	Chinese Pangenome Consortium
AAGC032318D	Bouyei	East Asia	NGS	Y	Chinese Pangenome Consortium
AAGC032319D	Bouyei	East Asia	NGS	Y	Chinese Pangenome Consortium
AAGC032320D	Bouyei	East Asia	NGS	Y	Chinese Pangenome Consortium
AAGC032338D	Bouyei	East Asia	NGS	Y	Chinese Pangenome Consortium
AAGC032340D	Bouyei	East Asia	NGS	Y	Chinese Pangenome Consortium
AAGC032341D	Bouyei	East Asia	NGS	Y	Chinese Pangenome Consortium
AAGC032342D	Bouyei	East Asia	NGS	Y	Chinese Pangenome Consortium
AAGC032343D	Bouyei	East Asia	NGS	Y	Chinese Pangenome Consortium
AAGC032411D	Bouyei	East Asia	NGS	Y	Chinese Pangenome Consortium
AAGC032444D	Bouyei	East Asia	NGS	Y	Chinese Pangenome Consortium
AAGC032445D	Bouyei	East Asia	NGS	Y	Chinese Pangenome Consortium
AAGC032487D	Bouyei	East Asia	NGS	Y	Chinese Pangenome Consortium
AAGC032488D	Bouyei	East Asia	NGS	Y	Chinese Pangenome Consortium
AAGC032525D	Bouyei	East Asia	NGS	Y	Chinese Pangenome Consortium
AAGC032526D	Bouyei	East Asia	NGS	Y	Chinese Pangenome Consortium
AAGC032014D	Chaoxian	East Asia	NGS	Y	Chinese Pangenome Consortium
AAGC032015D	Chaoxian	East Asia	NGS	Y	Chinese Pangenome Consortium
AAGC032016D	Chaoxian	East Asia	NGS	Y	Chinese Pangenome Consortium
AAGC032017D	Chaoxian	East Asia	NGS	Y	Chinese Pangenome Consortium
AAGC032018D	Chaoxian	East Asia	NGS	Y	Chinese Pangenome Consortium
AAGC032019D	Chaoxian	East Asia	NGS	Y	Chinese Pangenome Consortium
AAGC032020D	Chaoxian	East Asia	NGS	Y	Chinese Pangenome Consortium
AAGC032058D	Chaoxian	East Asia	NGS	Y	Chinese Pangenome Consortium
AAGC032156D	Chaoxian	East Asia	NGS	Y	Chinese Pangenome Consortium
AAGC032286D	Chaoxian	East Asia	NGS	Y	Chinese Pangenome Consortium
AAGC032303D	Chaoxian	East Asia	NGS	Y	Chinese Pangenome Consortium
AAGC032304D	Chaoxian	East Asia	NGS	Y	Chinese Pangenome Consortium
AAGC032305D	Chaoxian	East Asia	NGS	Y	Chinese Pangenome Consortium
AAGC032306D	Chaoxian	East Asia	NGS	Y	Chinese Pangenome Consortium
AAGC032594D	Chaoxian	East Asia	NGS	Y	Chinese Pangenome Consortium
AAGC032596D	Chaoxian	East Asia	NGS	Y	Chinese Pangenome Consortium
AAGC032624D	Chaoxian	East Asia	NGS	Y	Chinese Pangenome Consortium
AAGC032625D	Chaoxian	East Asia	NGS	Y	Chinese Pangenome Consortium
HGDP01308	Dai	East Asia	NGS	Y	HGDP
HGDP01309	Dai	East Asia	NGS	Y	HGDP
HGDP01310	Dai	East Asia	NGS	Y	HGDP
HGDP01311	Dai	East Asia	NGS	Y	HGDP
HGDP01312	Dai	East Asia	NGS	Y	HGDP
HGDP01313	Dai	East Asia	NGS	Y	HGDP
HGDP01314	Dai	East Asia	NGS	Y	HGDP
HGDP01315	Dai	East Asia	NGS	Y	HGDP
HGDP01316	Dai	East Asia	NGS	Y	HGDP
AAGC032272D	Deang	East Asia	NGS	Y	Chinese Pangenome Consortium
AAGC032273D	Deang	East Asia	NGS	Y	Chinese Pangenome Consortium
AAGC032274D	Deang	East Asia	NGS	Y	Chinese Pangenome Consortium
AAGC032291D	Deang	East Asia	NGS	Y	Chinese Pangenome Consortium
AAGC032292D	Deang	East Asia	NGS	Y	Chinese Pangenome Consortium
AAGC032294D	Deang	East Asia	NGS	Y	Chinese Pangenome Consortium
AAGC032353D	Deang	East Asia	NGS	Y	Chinese Pangenome Consortium
AAGC032354D	Deang	East Asia	NGS	Y	Chinese Pangenome Consortium
AAGC032446D	Deang	East Asia	NGS	Y	Chinese Pangenome Consortium
AAGC032461D	Deang	East Asia	NGS	Y	Chinese Pangenome Consortium
AAGC032462D	Deang	East Asia	NGS	Y	Chinese Pangenome Consortium
AAGC032502D	Deang	East Asia	NGS	Y	Chinese Pangenome Consortium
AAGC032503D	Deang	East Asia	NGS	Y	Chinese Pangenome Consortium
AAGC032504D	Deang	East Asia	NGS	Y	Chinese Pangenome Consortium
AAGC032234D	Dong	East Asia	NGS	Y	Chinese Pangenome Consortium
AAGC032235D	Dong	East Asia	NGS	Y	Chinese Pangenome Consortium
AAGC032252D	Dong	East Asia	NGS	Y	Chinese Pangenome Consortium
AAGC032253D	Dong	East Asia	NGS	Y	Chinese Pangenome Consortium
AAGC032467D	Dong	East Asia	NGS	Y	Chinese Pangenome Consortium
AAGC032468D	Dong	East Asia	NGS	Y	Chinese Pangenome Consortium
AAGC032469D	Dong	East Asia	NGS	Y	Chinese Pangenome Consortium
AAGC032470D	Dong	East Asia	NGS	Y	Chinese Pangenome Consortium
AAGC032471D	Dong	East Asia	NGS	Y	Chinese Pangenome Consortium
AAGC032472D	Dong	East Asia	NGS	Y	Chinese Pangenome Consortium
AAGC032473D	Dong	East Asia	NGS	Y	Chinese Pangenome Consortium
AAGC032474D	Dong	East Asia	NGS	Y	Chinese Pangenome Consortium
AAGC032510D	Dong	East Asia	NGS	Y	Chinese Pangenome Consortium
AAGC032511D	Dong	East Asia	NGS	Y	Chinese Pangenome Consortium
AAGC032512D	Dong	East Asia	NGS	Y	Chinese Pangenome Consortium
AAGC032700D	Dong	East Asia	NGS	Y	Chinese Pangenome Consortium
AAGC032701D	Dong	East Asia	NGS	Y	Chinese Pangenome Consortium
AAGC032702D	Dong	East Asia	NGS	Y	Chinese Pangenome Consortium
AAGC032744D	Dong	East Asia	NGS	Y	Chinese Pangenome Consortium
AAGC032745D	Dong	East Asia	NGS	Y	Chinese Pangenome Consortium
AAGC032496D	Dongxiang	East Asia	NGS	Y	Chinese Pangenome Consortium
AAGC032497D	Dongxiang	East Asia	NGS	Y	Chinese Pangenome Consortium
AAGC032498D	Dongxiang	East Asia	NGS	Y	Chinese Pangenome Consortium
AAGC032537D	Dongxiang	East Asia	NGS	Y	Chinese Pangenome Consortium
AAGC032538D	Dongxiang	East Asia	NGS	Y	Chinese Pangenome Consortium
AAGC032539D	Dongxiang	East Asia	NGS	Y	Chinese Pangenome Consortium
AAGC032540D	Dongxiang	East Asia	NGS	Y	Chinese Pangenome Consortium
AAGC032541D	Dongxiang	East Asia	NGS	Y	Chinese Pangenome Consortium
AAGC032542D	Dongxiang	East Asia	NGS	Y	Chinese Pangenome Consortium
AAGC032713D	Dongxiang	East Asia	NGS	Y	Chinese Pangenome Consortium
AAGC032714D	Dongxiang	East Asia	NGS	Y	Chinese Pangenome Consortium
AAGC032715D	Dongxiang	East Asia	NGS	Y	Chinese Pangenome Consortium
AAGC032717D	Dongxiang	East Asia	NGS	Y	Chinese Pangenome Consortium
AAGC032718D	Dongxiang	East Asia	NGS	Y	Chinese Pangenome Consortium
AAGC032719D	Dongxiang	East Asia	NGS	Y	Chinese Pangenome Consortium
AAGC032720D	Dongxiang	East Asia	NGS	Y	Chinese Pangenome Consortium
AAGC032732D	Dongxiang	East Asia	NGS	Y	Chinese Pangenome Consortium
AAGC032733D	Dongxiang	East Asia	NGS	Y	Chinese Pangenome Consortium
AAGC032237D	Drung	East Asia	NGS	Y	Chinese Pangenome Consortium
AAGC032238D	Drung	East Asia	NGS	Y	Chinese Pangenome Consortium
AAGC032239D	Drung	East Asia	NGS	Y	Chinese Pangenome Consortium
AAGC032241D	Drung	East Asia	NGS	Y	Chinese Pangenome Consortium
AAGC032242D	Drung	East Asia	NGS	Y	Chinese Pangenome Consortium
AAGC032254D	Drung	East Asia	NGS	Y	Chinese Pangenome Consortium
AAGC032257D	Drung	East Asia	NGS	Y	Chinese Pangenome Consortium
AAGC032258D	Drung	East Asia	NGS	Y	Chinese Pangenome Consortium
AAGC032259D	Drung	East Asia	NGS	Y	Chinese Pangenome Consortium
AAGC032260D	Drung	East Asia	NGS	Y	Chinese Pangenome Consortium
AAGC032366D	Drung	East Asia	NGS	Y	Chinese Pangenome Consortium
AAGC032412D	Drung	East Asia	NGS	Y	Chinese Pangenome Consortium
AAGC032450D	Drung	East Asia	NGS	Y	Chinese Pangenome Consortium
AAGC032451D	Drung	East Asia	NGS	Y	Chinese Pangenome Consortium
AAGC032080D	Gelao	East Asia	NGS	Y	Chinese Pangenome Consortium
AAGC032081D	Gelao	East Asia	NGS	Y	Chinese Pangenome Consortium
AAGC032082D	Gelao	East Asia	NGS	Y	Chinese Pangenome Consortium
AAGC032083D	Gelao	East Asia	NGS	Y	Chinese Pangenome Consortium
AAGC032146D	Gelao	East Asia	NGS	Y	Chinese Pangenome Consortium
AAGC032147D	Gelao	East Asia	NGS	Y	Chinese Pangenome Consortium
AAGC032148D	Gelao	East Asia	NGS	Y	Chinese Pangenome Consortium
AAGC032149D	Gelao	East Asia	NGS	Y	Chinese Pangenome Consortium
AAGC032150D	Gelao	East Asia	NGS	Y	Chinese Pangenome Consortium
AAGC032151D	Gelao	East Asia	NGS	Y	Chinese Pangenome Consortium
AAGC032184D	Gelao	East Asia	NGS	Y	Chinese Pangenome Consortium
AAGC032185D	Gelao	East Asia	NGS	Y	Chinese Pangenome Consortium
AAGC032186D	Gelao	East Asia	NGS	Y	Chinese Pangenome Consortium
AAGC032187D	Gelao	East Asia	NGS	Y	Chinese Pangenome Consortium
AAGC032188D	Gelao	East Asia	NGS	Y	Chinese Pangenome Consortium
AAGC032494D	Gelao	East Asia	NGS	Y	Chinese Pangenome Consortium
AAGC032532D	Gelao	East Asia	NGS	Y	Chinese Pangenome Consortium
AAGC032533D	Gelao	East Asia	NGS	Y	Chinese Pangenome Consortium
AAGC032534D	Gelao	East Asia	NGS	Y	Chinese Pangenome Consortium
AAGC032712D	Gelao	East Asia	NGS	Y	Chinese Pangenome Consortium
AAGC032475D	Gin	East Asia	NGS	Y	Chinese Pangenome Consortium
AAGC032476D	Gin	East Asia	NGS	Y	Chinese Pangenome Consortium
AAGC032513D	Gin	East Asia	NGS	Y	Chinese Pangenome Consortium
AAGC032514D	Gin	East Asia	NGS	Y	Chinese Pangenome Consortium
AAGC032516D	Gin	East Asia	NGS	Y	Chinese Pangenome Consortium
AAGC032703D	Gin	East Asia	NGS	Y	Chinese Pangenome Consortium
AAGC032704D	Gin	East Asia	NGS	Y	Chinese Pangenome Consortium
AAGC032705D	Gin	East Asia	NGS	Y	Chinese Pangenome Consortium
AAGC032723D	Gin	East Asia	NGS	Y	Chinese Pangenome Consortium
AAGC032724D	Gin	East Asia	NGS	Y	Chinese Pangenome Consortium
AAGC032725D	Gin	East Asia	NGS	Y	Chinese Pangenome Consortium
AAGC032726D	Gin	East Asia	NGS	Y	Chinese Pangenome Consortium
AAGC032727D	Gin	East Asia	NGS	Y	Chinese Pangenome Consortium
AAGC032728D	Gin	East Asia	NGS	Y	Chinese Pangenome Consortium
AAGC032729D	Gin	East Asia	NGS	Y	Chinese Pangenome Consortium
AAGC032741D	Gin	East Asia	NGS	Y	Chinese Pangenome Consortium
AAGC032742D	Gin	East Asia	NGS	Y	Chinese Pangenome Consortium
AAGC032747D	Gin	East Asia	NGS	Y	Chinese Pangenome Consortium
AAGC022151D	HAN	East Asia	NGS	Y	Chinese Pangenome Consortium
AAGC022152D	HAN	East Asia	NGS	Y	Chinese Pangenome Consortium
AAGC022153D	HAN	East Asia	NGS	Y	Chinese Pangenome Consortium
AAGC022154D	HAN	East Asia	NGS	Y	Chinese Pangenome Consortium
AAGC022155D	HAN	East Asia	NGS	Y	Chinese Pangenome Consortium
AAGC022156D	HAN	East Asia	NGS	Y	Chinese Pangenome Consortium
AAGC022157D	HAN	East Asia	NGS	Y	Chinese Pangenome Consortium
AAGC022158D	HAN	East Asia	NGS	Y	Chinese Pangenome Consortium
AAGC022159D	HAN	East Asia	NGS	Y	Chinese Pangenome Consortium
AAGC022160D	HAN	East Asia	NGS	Y	Chinese Pangenome Consortium
AAGC022161D	HAN	East Asia	NGS	Y	Chinese Pangenome Consortium
AAGC022162D	HAN	East Asia	NGS	Y	Chinese Pangenome Consortium
AAGC022163D	HAN	East Asia	NGS	Y	Chinese Pangenome Consortium
AAGC022164D	HAN	East Asia	NGS	Y	Chinese Pangenome Consortium
AAGC022165D	HAN	East Asia	NGS	Y	Chinese Pangenome Consortium
AAGC022166D	HAN	East Asia	NGS	Y	Chinese Pangenome Consortium
AAGC022167D	HAN	East Asia	NGS	Y	Chinese Pangenome Consortium
AAGC022168D	HAN	East Asia	NGS	Y	Chinese Pangenome Consortium
AAGC022169D	HAN	East Asia	NGS	Y	Chinese Pangenome Consortium
AAGC022170D	HAN	East Asia	NGS	Y	Chinese Pangenome Consortium
AAGC022171D	HAN	East Asia	NGS	Y	Chinese Pangenome Consortium
AAGC022172D	HAN	East Asia	NGS	Y	Chinese Pangenome Consortium
AAGC022173D	HAN	East Asia	NGS	Y	Chinese Pangenome Consortium
AAGC022174D	HAN	East Asia	NGS	Y	Chinese Pangenome Consortium
AAGC022175D	HAN	East Asia	NGS	Y	Chinese Pangenome Consortium
AAGC022176D	HAN	East Asia	NGS	Y	Chinese Pangenome Consortium
AAGC022177D	HAN	East Asia	NGS	Y	Chinese Pangenome Consortium
AAGC022178D	HAN	East Asia	NGS	Y	Chinese Pangenome Consortium
AAGC022179D	HAN	East Asia	NGS	Y	Chinese Pangenome Consortium
AAGC022180D	HAN	East Asia	NGS	Y	Chinese Pangenome Consortium
AAGC022181D	HAN	East Asia	NGS	Y	Chinese Pangenome Consortium
AAGC022182D	HAN	East Asia	NGS	Y	Chinese Pangenome Consortium
AAGC022183D	HAN	East Asia	NGS	Y	Chinese Pangenome Consortium
AAGC022184D	HAN	East Asia	NGS	Y	Chinese Pangenome Consortium
AAGC022185D	HAN	East Asia	NGS	Y	Chinese Pangenome Consortium
AAGC022186D	HAN	East Asia	NGS	Y	Chinese Pangenome Consortium
AAGC022187D	HAN	East Asia	NGS	Y	Chinese Pangenome Consortium
AAGC022188D	HAN	East Asia	NGS	Y	Chinese Pangenome Consortium
AAGC022189D	HAN	East Asia	NGS	Y	Chinese Pangenome Consortium
AAGC022190D	HAN	East Asia	NGS	Y	Chinese Pangenome Consortium
AAGC022191D	HAN	East Asia	NGS	Y	Chinese Pangenome Consortium
AAGC022192D	HAN	East Asia	NGS	Y	Chinese Pangenome Consortium
AAGC022193D	HAN	East Asia	NGS	Y	Chinese Pangenome Consortium
AAGC022194D	HAN	East Asia	NGS	Y	Chinese Pangenome Consortium
AAGC022195D	HAN	East Asia	NGS	Y	Chinese Pangenome Consortium
AAGC022196D	HAN	East Asia	NGS	Y	Chinese Pangenome Consortium
AAGC022197D	HAN	East Asia	NGS	Y	Chinese Pangenome Consortium
AAGC022198D	HAN	East Asia	NGS	Y	Chinese Pangenome Consortium
AAGC022199D	HAN	East Asia	NGS	Y	Chinese Pangenome Consortium
AAGC022200D	HAN	East Asia	NGS	Y	Chinese Pangenome Consortium
AAGC022201D	HAN	East Asia	NGS	Y	Chinese Pangenome Consortium
AAGC022202D	HAN	East Asia	NGS	Y	Chinese Pangenome Consortium
AAGC022203D	HAN	East Asia	NGS	Y	Chinese Pangenome Consortium
AAGC022204D	HAN	East Asia	NGS	Y	Chinese Pangenome Consortium
AAGC022205D	HAN	East Asia	NGS	Y	Chinese Pangenome Consortium
AAGC022206D	HAN	East Asia	NGS	Y	Chinese Pangenome Consortium
AAGC022207D	HAN	East Asia	NGS	Y	Chinese Pangenome Consortium
AAGC022208D	HAN	East Asia	NGS	Y	Chinese Pangenome Consortium
AAGC022209D	HAN	East Asia	NGS	Y	Chinese Pangenome Consortium
AAGC022210D	HAN	East Asia	NGS	Y	Chinese Pangenome Consortium
AAGC022211D	HAN	East Asia	NGS	Y	Chinese Pangenome Consortium
AAGC022212D	HAN	East Asia	NGS	Y	Chinese Pangenome Consortium
AAGC022213D	HAN	East Asia	NGS	Y	Chinese Pangenome Consortium
AAGC022214D	HAN	East Asia	NGS	Y	Chinese Pangenome Consortium
AAGC022215D	HAN	East Asia	NGS	Y	Chinese Pangenome Consortium
AAGC022216D	HAN	East Asia	NGS	Y	Chinese Pangenome Consortium
AAGC022217D	HAN	East Asia	NGS	Y	Chinese Pangenome Consortium
AAGC022218D	HAN	East Asia	NGS	Y	Chinese Pangenome Consortium
AAGC022219D	HAN	East Asia	NGS	Y	Chinese Pangenome Consortium
AAGC022220D	HAN	East Asia	NGS	Y	Chinese Pangenome Consortium
AAGC022221D	HAN	East Asia	NGS	Y	Chinese Pangenome Consortium
AAGC022222D	HAN	East Asia	NGS	Y	Chinese Pangenome Consortium
AAGC022223D	HAN	East Asia	NGS	Y	Chinese Pangenome Consortium
AAGC022224D	HAN	East Asia	NGS	Y	Chinese Pangenome Consortium
AAGC022225D	HAN	East Asia	NGS	Y	Chinese Pangenome Consortium
AAGC022226D	HAN	East Asia	NGS	Y	Chinese Pangenome Consortium
AAGC022227D	HAN	East Asia	NGS	Y	Chinese Pangenome Consortium
AAGC022228D	HAN	East Asia	NGS	Y	Chinese Pangenome Consortium
AAGC022229D	HAN	East Asia	NGS	Y	Chinese Pangenome Consortium
AAGC022230D	HAN	East Asia	NGS	Y	Chinese Pangenome Consortium
AAGC022231D	HAN	East Asia	NGS	Y	Chinese Pangenome Consortium
AAGC022232D	HAN	East Asia	NGS	Y	Chinese Pangenome Consortium
AAGC022233D	HAN	East Asia	NGS	Y	Chinese Pangenome Consortium
AAGC022234D	HAN	East Asia	NGS	Y	Chinese Pangenome Consortium
AAGC022235D	HAN	East Asia	NGS	Y	Chinese Pangenome Consortium
AAGC022236D	HAN	East Asia	NGS	Y	Chinese Pangenome Consortium
AAGC022237D	HAN	East Asia	NGS	Y	Chinese Pangenome Consortium
AAGC022238D	HAN	East Asia	NGS	Y	Chinese Pangenome Consortium
AAGC022239D	HAN	East Asia	NGS	Y	Chinese Pangenome Consortium
AAGC022240D	HAN	East Asia	NGS	Y	Chinese Pangenome Consortium
AAGC031502D	HAN	East Asia	NGS	Y	Chinese Pangenome Consortium
AAGC031503D	HAN	East Asia	NGS	Y	Chinese Pangenome Consortium
AAGC031504D	HAN	East Asia	NGS	Y	Chinese Pangenome Consortium
AAGC031505D	HAN	East Asia	NGS	Y	Chinese Pangenome Consortium
AAGC031506D	HAN	East Asia	NGS	Y	Chinese Pangenome Consortium
AAGC031507D	HAN	East Asia	NGS	Y	Chinese Pangenome Consortium
AAGC031508D	HAN	East Asia	NGS	Y	Chinese Pangenome Consortium
AAGC031509D	HAN	East Asia	NGS	Y	Chinese Pangenome Consortium
AAGC031510D	HAN	East Asia	NGS	Y	Chinese Pangenome Consortium
AAGC031511D	HAN	East Asia	NGS	Y	Chinese Pangenome Consortium
AAGC031512D	HAN	East Asia	NGS	Y	Chinese Pangenome Consortium
AAGC031513D	HAN	East Asia	NGS	Y	Chinese Pangenome Consortium
AAGC031514D	HAN	East Asia	NGS	Y	Chinese Pangenome Consortium
AAGC031515D	HAN	East Asia	NGS	Y	Chinese Pangenome Consortium
AAGC031516D	HAN	East Asia	NGS	Y	Chinese Pangenome Consortium
AAGC031517D	HAN	East Asia	NGS	Y	Chinese Pangenome Consortium
AAGC031518D	HAN	East Asia	NGS	Y	Chinese Pangenome Consortium
AAGC031519D	HAN	East Asia	NGS	Y	Chinese Pangenome Consortium
AAGC031520D	HAN	East Asia	NGS	Y	Chinese Pangenome Consortium
AAGC031521D	HAN	East Asia	NGS	Y	Chinese Pangenome Consortium
AAGC031522D	HAN	East Asia	NGS	Y	Chinese Pangenome Consortium
AAGC031523D	HAN	East Asia	NGS	Y	Chinese Pangenome Consortium
AAGC031524D	HAN	East Asia	NGS	Y	Chinese Pangenome Consortium
AAGC031525D	HAN	East Asia	NGS	Y	Chinese Pangenome Consortium
AAGC031526D	HAN	East Asia	NGS	Y	Chinese Pangenome Consortium
AAGC031527D	HAN	East Asia	NGS	Y	Chinese Pangenome Consortium
AAGC031528D	HAN	East Asia	NGS	Y	Chinese Pangenome Consortium
AAGC031529D	HAN	East Asia	NGS	Y	Chinese Pangenome Consortium
AAGC031530D	HAN	East Asia	NGS	Y	Chinese Pangenome Consortium
AAGC031531D	HAN	East Asia	NGS	Y	Chinese Pangenome Consortium
AAGC031532D	HAN	East Asia	NGS	Y	Chinese Pangenome Consortium
AAGC031533D	HAN	East Asia	NGS	Y	Chinese Pangenome Consortium
AAGC031534D	HAN	East Asia	NGS	Y	Chinese Pangenome Consortium
AAGC031535D	HAN	East Asia	NGS	Y	Chinese Pangenome Consortium
AAGC031536D	HAN	East Asia	NGS	Y	Chinese Pangenome Consortium
AAGC031537D	HAN	East Asia	NGS	Y	Chinese Pangenome Consortium
AAGC031538D	HAN	East Asia	NGS	Y	Chinese Pangenome Consortium
AAGC031539D	HAN	East Asia	NGS	Y	Chinese Pangenome Consortium
AAGC031540D	HAN	East Asia	NGS	Y	Chinese Pangenome Consortium
AAGC031541D	HAN	East Asia	NGS	Y	Chinese Pangenome Consortium
AAGC031542D	HAN	East Asia	NGS	Y	Chinese Pangenome Consortium
HGDP00774	HAN	East Asia	NGS	Y	HGDP
HGDP00775	HAN	East Asia	NGS	Y	HGDP
HGDP00776	HAN	East Asia	NGS	Y	HGDP
HGDP00777	HAN	East Asia	NGS	Y	HGDP
HGDP00779	HAN	East Asia	NGS	Y	HGDP
HGDP00780	HAN	East Asia	NGS	Y	HGDP
HGDP00781	HAN	East Asia	NGS	Y	HGDP
HGDP00782	HAN	East Asia	NGS	Y	HGDP
HGDP00783	HAN	East Asia	NGS	Y	HGDP
HGDP00784	HAN	East Asia	NGS	Y	HGDP
HGDP00785	HAN	East Asia	NGS	Y	HGDP
HGDP00786	HAN	East Asia	NGS	Y	HGDP
HGDP00811	HAN	East Asia	NGS	Y	HGDP
HGDP00812	HAN	East Asia	NGS	Y	HGDP
HGDP00813	HAN	East Asia	NGS	Y	HGDP
HGDP00814	HAN	East Asia	NGS	Y	HGDP
HGDP00815	HAN	East Asia	NGS	Y	HGDP
HGDP00817	HAN	East Asia	NGS	Y	HGDP
HGDP00818	HAN	East Asia	NGS	Y	HGDP
HGDP00819	HAN	East Asia	NGS	Y	HGDP
HGDP00820	HAN	East Asia	NGS	Y	HGDP
HGDP00821	HAN	East Asia	NGS	Y	HGDP
HGDP00822	HAN	East Asia	NGS	Y	HGDP
HGDP00971	HAN	East Asia	NGS	Y	HGDP
HGDP00972	HAN	East Asia	NGS	Y	HGDP
HGDP00973	HAN	East Asia	NGS	Y	HGDP
HGDP00974	HAN	East Asia	NGS	Y	HGDP
HGDP00975	HAN	East Asia	NGS	Y	HGDP
HGDP00976	HAN	East Asia	NGS	Y	HGDP
HGDP00977	HAN	East Asia	NGS	Y	HGDP
HGDP01021	HAN	East Asia	NGS	Y	HGDP
HGDP01023	HAN	East Asia	NGS	Y	HGDP
HGDP01024	HAN	East Asia	NGS	Y	HGDP
HGDP01287	HAN	East Asia	NGS	Y	HGDP
HGDP01288	HAN	East Asia	NGS	Y	HGDP
HGDP01289	HAN	East Asia	NGS	Y	HGDP
HGDP01290	HAN	East Asia	NGS	Y	HGDP
HGDP01291	HAN	East Asia	NGS	Y	HGDP
HGDP01292	HAN	East Asia	NGS	Y	HGDP
HGDP01293	HAN	East Asia	NGS	Y	HGDP
HGDP01294	HAN	East Asia	NGS	Y	HGDP
HGDP01295	HAN	East Asia	NGS	Y	HGDP
HGDP01296	HAN	East Asia	NGS	Y	HGDP
AAGC032107D	Hani	East Asia	NGS	Y	Chinese Pangenome Consortium
AAGC032632D	Hani	East Asia	NGS	Y	Chinese Pangenome Consortium
AAGC032633D	Hani	East Asia	NGS	Y	Chinese Pangenome Consortium
AAGC032634D	Hani	East Asia	NGS	Y	Chinese Pangenome Consortium
AAGC032635D	Hani	East Asia	NGS	Y	Chinese Pangenome Consortium
AAGC032636D	Hani	East Asia	NGS	Y	Chinese Pangenome Consortium
AAGC032637D	Hani	East Asia	NGS	Y	Chinese Pangenome Consortium
AAGC032638D	Hani	East Asia	NGS	Y	Chinese Pangenome Consortium
AAGC032639D	Hani	East Asia	NGS	Y	Chinese Pangenome Consortium
AAGC032640D	Hani	East Asia	NGS	Y	Chinese Pangenome Consortium
AAGC032669D	Hani	East Asia	NGS	Y	Chinese Pangenome Consortium
AAGC032670D	Hani	East Asia	NGS	Y	Chinese Pangenome Consortium
AAGC032671D	Hani	East Asia	NGS	Y	Chinese Pangenome Consortium
AAGC032672D	Hani	East Asia	NGS	Y	Chinese Pangenome Consortium
AAGC032673D	Hani	East Asia	NGS	Y	Chinese Pangenome Consortium
AAGC032674D	Hani	East Asia	NGS	Y	Chinese Pangenome Consortium
AAGC032675D	Hani	East Asia	NGS	Y	Chinese Pangenome Consortium
AAGC032676D	Hani	East Asia	NGS	Y	Chinese Pangenome Consortium
AAGC032749D	Hani	East Asia	NGS	Y	Chinese Pangenome Consortium
AAGC032047D	Hezhen	East Asia	NGS	Y	Chinese Pangenome Consortium
AAGC032547D	Hezhen	East Asia	NGS	Y	Chinese Pangenome Consortium
AAGC032589D	Hezhen	East Asia	NGS	Y	Chinese Pangenome Consortium
AAGC032619D	Hezhen	East Asia	NGS	Y	Chinese Pangenome Consortium
AAGC032653D	Hezhen	East Asia	NGS	Y	Chinese Pangenome Consortium
AAGC032654D	Hezhen	East Asia	NGS	Y	Chinese Pangenome Consortium
AAGC032655D	Hezhen	East Asia	NGS	Y	Chinese Pangenome Consortium
AAGC032686D	Hezhen	East Asia	NGS	Y	Chinese Pangenome Consortium
HGDP01233	Hezhen	East Asia	NGS	Y	HGDP
HGDP01237	Hezhen	East Asia	NGS	Y	HGDP
HGDP01238	Hezhen	East Asia	NGS	Y	HGDP
HGDP01241	Hezhen	East Asia	NGS	Y	HGDP
AAGC022115D	Hui	East Asia	NGS	Y	Chinese Pangenome Consortium
AAGC022116D	Hui	East Asia	NGS	Y	Chinese Pangenome Consortium
AAGC022117D	Hui	East Asia	NGS	Y	Chinese Pangenome Consortium
AAGC022118D	Hui	East Asia	NGS	Y	Chinese Pangenome Consortium
AAGC022119D	Hui	East Asia	NGS	Y	Chinese Pangenome Consortium
AAGC022120D	Hui	East Asia	NGS	Y	Chinese Pangenome Consortium
AAGC022121D	Hui	East Asia	NGS	Y	Chinese Pangenome Consortium
AAGC022122D	Hui	East Asia	NGS	Y	Chinese Pangenome Consortium
AAGC022123D	Hui	East Asia	NGS	Y	Chinese Pangenome Consortium
AAGC022124D	Hui	East Asia	NGS	Y	Chinese Pangenome Consortium
AAGC022125D	Hui	East Asia	NGS	Y	Chinese Pangenome Consortium
AAGC022126D	Hui	East Asia	NGS	Y	Chinese Pangenome Consortium
AAGC022127D	Hui	East Asia	NGS	Y	Chinese Pangenome Consortium
AAGC022128D	Hui	East Asia	NGS	Y	Chinese Pangenome Consortium
AAGC022129D	Hui	East Asia	NGS	Y	Chinese Pangenome Consortium
AAGC022130D	Hui	East Asia	NGS	Y	Chinese Pangenome Consortium
AAGC022131D	Hui	East Asia	NGS	Y	Chinese Pangenome Consortium
AAGC022132D	Hui	East Asia	NGS	Y	Chinese Pangenome Consortium
AAGC022133D	Hui	East Asia	NGS	Y	Chinese Pangenome Consortium
AAGC022134D	Hui	East Asia	NGS	Y	Chinese Pangenome Consortium
AAGC022135D	Hui	East Asia	NGS	Y	Chinese Pangenome Consortium
AAGC022136D	Hui	East Asia	NGS	Y	Chinese Pangenome Consortium
AAGC022137D	Hui	East Asia	NGS	Y	Chinese Pangenome Consortium
AAGC022138D	Hui	East Asia	NGS	Y	Chinese Pangenome Consortium
AAGC022139D	Hui	East Asia	NGS	Y	Chinese Pangenome Consortium
AAGC022140D	Hui	East Asia	NGS	Y	Chinese Pangenome Consortium
AAGC022141D	Hui	East Asia	NGS	Y	Chinese Pangenome Consortium
AAGC022142D	Hui	East Asia	NGS	Y	Chinese Pangenome Consortium
AAGC022143D	Hui	East Asia	NGS	Y	Chinese Pangenome Consortium
AAGC022144D	Hui	East Asia	NGS	Y	Chinese Pangenome Consortium
AAGC022145D	Hui	East Asia	NGS	Y	Chinese Pangenome Consortium
AAGC022146D	Hui	East Asia	NGS	Y	Chinese Pangenome Consortium
AAGC022147D	Hui	East Asia	NGS	Y	Chinese Pangenome Consortium
AAGC022148D	Hui	East Asia	NGS	Y	Chinese Pangenome Consortium
AAGC022149D	Hui	East Asia	NGS	Y	Chinese Pangenome Consortium
AAGC022150D	Hui	East Asia	NGS	Y	Chinese Pangenome Consortium
HGDP00747	Japanese	East Asia	NGS	Y	HGDP
HGDP00748	Japanese	East Asia	NGS	Y	HGDP
HGDP00749	Japanese	East Asia	NGS	Y	HGDP
HGDP00750	Japanese	East Asia	NGS	Y	HGDP
HGDP00751	Japanese	East Asia	NGS	Y	HGDP
HGDP00752	Japanese	East Asia	NGS	Y	HGDP
HGDP00753	Japanese	East Asia	NGS	Y	HGDP
HGDP00754	Japanese	East Asia	NGS	Y	HGDP
HGDP00755	Japanese	East Asia	NGS	Y	HGDP
HGDP00756	Japanese	East Asia	NGS	Y	HGDP
HGDP00757	Japanese	East Asia	NGS	Y	HGDP
HGDP00758	Japanese	East Asia	NGS	Y	HGDP
HGDP00759	Japanese	East Asia	NGS	Y	HGDP
HGDP00760	Japanese	East Asia	NGS	Y	HGDP
HGDP00761	Japanese	East Asia	NGS	Y	HGDP
HGDP00762	Japanese	East Asia	NGS	Y	HGDP
HGDP00763	Japanese	East Asia	NGS	Y	HGDP
HGDP00764	Japanese	East Asia	NGS	Y	HGDP
HGDP00765	Japanese	East Asia	NGS	Y	HGDP
HGDP00766	Japanese	East Asia	NGS	Y	HGDP
HGDP00767	Japanese	East Asia	NGS	Y	HGDP
HGDP00768	Japanese	East Asia	NGS	Y	HGDP
HGDP00769	Japanese	East Asia	NGS	Y	HGDP
HGDP00771	Japanese	East Asia	NGS	Y	HGDP
HGDP00772	Japanese	East Asia	NGS	Y	HGDP
HGDP00773	Japanese	East Asia	NGS	Y	HGDP
HGDP00790	Japanese	East Asia	NGS	Y	HGDP
HGDP00791	Japanese	East Asia	NGS	Y	HGDP
HGDP00828	Japanese	East Asia	NGS	Y	HGDP
NA18940	Japanese	East Asia	NGS		Chinese Pangenome Consortium
AAGC032048D	Jingpo	East Asia	NGS	Y	Chinese Pangenome Consortium
AAGC032049D	Jingpo	East Asia	NGS	Y	Chinese Pangenome Consortium
AAGC032050D	Jingpo	East Asia	NGS	Y	Chinese Pangenome Consortium
AAGC032051D	Jingpo	East Asia	NGS	Y	Chinese Pangenome Consortium
AAGC032135D	Jingpo	East Asia	NGS	Y	Chinese Pangenome Consortium
AAGC032137D	Jingpo	East Asia	NGS	Y	Chinese Pangenome Consortium
AAGC032138D	Jingpo	East Asia	NGS	Y	Chinese Pangenome Consortium
AAGC032243D	Jingpo	East Asia	NGS	Y	Chinese Pangenome Consortium
AAGC032244D	Jingpo	East Asia	NGS	Y	Chinese Pangenome Consortium
AAGC032246D	Jingpo	East Asia	NGS	Y	Chinese Pangenome Consortium
AAGC032263D	Jingpo	East Asia	NGS	Y	Chinese Pangenome Consortium
AAGC032410D	Jingpo	East Asia	NGS	Y	Chinese Pangenome Consortium
AAGC032440D	Jingpo	East Asia	NGS	Y	Chinese Pangenome Consortium
AAGC032442D	Jingpo	East Asia	NGS	Y	Chinese Pangenome Consortium
AAGC032443D	Jingpo	East Asia	NGS	Y	Chinese Pangenome Consortium
AAGC032545D	Jingpo	East Asia	NGS	Y	Chinese Pangenome Consortium
AAGC032011D	Jino	East Asia	NGS	Y	Chinese Pangenome Consortium
AAGC032181D	Jino	East Asia	NGS	Y	Chinese Pangenome Consortium
AAGC032297D	Jino	East Asia	NGS	Y	Chinese Pangenome Consortium
AAGC032330D	Jino	East Asia	NGS	Y	Chinese Pangenome Consortium
AAGC032331D	Jino	East Asia	NGS	Y	Chinese Pangenome Consortium
AAGC032395D	Jino	East Asia	NGS	Y	Chinese Pangenome Consortium
AAGC032396D	Jino	East Asia	NGS	Y	Chinese Pangenome Consortium
AAGC032397D	Jino	East Asia	NGS	Y	Chinese Pangenome Consortium
AAGC032398D	Jino	East Asia	NGS	Y	Chinese Pangenome Consortium
AAGC032400D	Jino	East Asia	NGS	Y	Chinese Pangenome Consortium
AAGC032401D	Jino	East Asia	NGS	Y	Chinese Pangenome Consortium
AAGC032402D	Jino	East Asia	NGS	Y	Chinese Pangenome Consortium
AAGC032427D	Jino	East Asia	NGS	Y	Chinese Pangenome Consortium
AAGC032428D	Jino	East Asia	NGS	Y	Chinese Pangenome Consortium
AAGC032429D	Jino	East Asia	NGS	Y	Chinese Pangenome Consortium
AAGC032430D	Jino	East Asia	NGS	Y	Chinese Pangenome Consortium
AAGC032431D	Jino	East Asia	NGS	Y	Chinese Pangenome Consortium
AAGC032432D	Jino	East Asia	NGS	Y	Chinese Pangenome Consortium
AAGC032433D	Jino	East Asia	NGS	Y	Chinese Pangenome Consortium
AAGC032231D	Khatso	East Asia	NGS	Y	Chinese Pangenome Consortium
AAGC032232D	Khatso	East Asia	NGS	Y	Chinese Pangenome Consortium
AAGC032250D	Khatso	East Asia	NGS	Y	Chinese Pangenome Consortium
AAGC032251D	Khatso	East Asia	NGS	Y	Chinese Pangenome Consortium
AAGC032352D	Khatso	East Asia	NGS	Y	Chinese Pangenome Consortium
AAGC032377D	Khatso	East Asia	NGS	Y	Chinese Pangenome Consortium
AAGC032573D	Khatso	East Asia	NGS	Y	Chinese Pangenome Consortium
AAGC032574D	Khatso	East Asia	NGS	Y	Chinese Pangenome Consortium
AAGC032604D	Khatso	East Asia	NGS	Y	Chinese Pangenome Consortium
AAGC032751D	Khatso	East Asia	NGS	Y	Chinese Pangenome Consortium
AAGC032068D	Lahu	East Asia	NGS	Y	Chinese Pangenome Consortium
AAGC032315D	Lahu	East Asia	NGS	Y	Chinese Pangenome Consortium
AAGC032337D	Lahu	East Asia	NGS	Y	Chinese Pangenome Consortium
AAGC032403D	Lahu	East Asia	NGS	Y	Chinese Pangenome Consortium
AAGC032434D	Lahu	East Asia	NGS	Y	Chinese Pangenome Consortium
AAGC032435D	Lahu	East Asia	NGS	Y	Chinese Pangenome Consortium
AAGC032437D	Lahu	East Asia	NGS	Y	Chinese Pangenome Consortium
AAGC032438D	Lahu	East Asia	NGS	Y	Chinese Pangenome Consortium
AAGC032486D	Lahu	East Asia	NGS	Y	Chinese Pangenome Consortium
HGDP01317	Lahu	East Asia	NGS	Y	HGDP
HGDP01318	Lahu	East Asia	NGS	Y	HGDP
HGDP01319	Lahu	East Asia	NGS	Y	HGDP
HGDP01320	Lahu	East Asia	NGS	Y	HGDP
HGDP01321	Lahu	East Asia	NGS	Y	HGDP
HGDP01322	Lahu	East Asia	NGS	Y	HGDP
HGDP01323	Lahu	East Asia	NGS	Y	HGDP
HGDP01326	Lahu	East Asia	NGS	Y	HGDP
AAGC032477D	Lisu	East Asia	NGS	Y	Chinese Pangenome Consortium
AAGC032478D	Lisu	East Asia	NGS	Y	Chinese Pangenome Consortium
AAGC032479D	Lisu	East Asia	NGS	Y	Chinese Pangenome Consortium
AAGC032480D	Lisu	East Asia	NGS	Y	Chinese Pangenome Consortium
AAGC032481D	Lisu	East Asia	NGS	Y	Chinese Pangenome Consortium
AAGC032482D	Lisu	East Asia	NGS	Y	Chinese Pangenome Consortium
AAGC032483D	Lisu	East Asia	NGS	Y	Chinese Pangenome Consortium
AAGC032484D	Lisu	East Asia	NGS	Y	Chinese Pangenome Consortium
AAGC032485D	Lisu	East Asia	NGS	Y	Chinese Pangenome Consortium
AAGC032517D	Lisu	East Asia	NGS	Y	Chinese Pangenome Consortium
AAGC032519D	Lisu	East Asia	NGS	Y	Chinese Pangenome Consortium
AAGC032520D	Lisu	East Asia	NGS	Y	Chinese Pangenome Consortium
AAGC032521D	Lisu	East Asia	NGS	Y	Chinese Pangenome Consortium
AAGC032522D	Lisu	East Asia	NGS	Y	Chinese Pangenome Consortium
AAGC032523D	Lisu	East Asia	NGS	Y	Chinese Pangenome Consortium
AAGC032524D	Lisu	East Asia	NGS	Y	Chinese Pangenome Consortium
AAGC032709D	Lisu	East Asia	NGS	Y	Chinese Pangenome Consortium
AAGC032710D	Lisu	East Asia	NGS	Y	Chinese Pangenome Consortium
AAGC032731D	Lisu	East Asia	NGS	Y	Chinese Pangenome Consortium
AAGC032162D	Man	East Asia	NGS	Y	Chinese Pangenome Consortium
AAGC032217D	Man	East Asia	NGS	Y	Chinese Pangenome Consortium
AAGC032249D	Man	East Asia	NGS	Y	Chinese Pangenome Consortium
AAGC032269D	Man	East Asia	NGS	Y	Chinese Pangenome Consortium
AAGC032287D	Man	East Asia	NGS	Y	Chinese Pangenome Consortium
AAGC032288D	Man	East Asia	NGS	Y	Chinese Pangenome Consortium
AAGC032289D	Man	East Asia	NGS	Y	Chinese Pangenome Consortium
AAGC032290D	Man	East Asia	NGS	Y	Chinese Pangenome Consortium
AAGC032307D	Man	East Asia	NGS	Y	Chinese Pangenome Consortium
AAGC032308D	Man	East Asia	NGS	Y	Chinese Pangenome Consortium
AAGC032309D	Man	East Asia	NGS	Y	Chinese Pangenome Consortium
AAGC032423D	Man	East Asia	NGS	Y	Chinese Pangenome Consortium
AAGC032598D	Man	East Asia	NGS	Y	Chinese Pangenome Consortium
AAGC032599D	Man	East Asia	NGS	Y	Chinese Pangenome Consortium
AAGC032600D	Man	East Asia	NGS	Y	Chinese Pangenome Consortium
AAGC032602D	Man	East Asia	NGS	Y	Chinese Pangenome Consortium
AAGC032626D	Man	East Asia	NGS	Y	Chinese Pangenome Consortium
AAGC032627D	Man	East Asia	NGS	Y	Chinese Pangenome Consortium
AAGC032628D	Man	East Asia	NGS	Y	Chinese Pangenome Consortium
AAGC032165D	Miao	East Asia	NGS	Y	Chinese Pangenome Consortium
AAGC032166D	Miao	East Asia	NGS	Y	Chinese Pangenome Consortium
AAGC032167D	Miao	East Asia	NGS	Y	Chinese Pangenome Consortium
AAGC032168D	Miao	East Asia	NGS	Y	Chinese Pangenome Consortium
AAGC032169D	Miao	East Asia	NGS	Y	Chinese Pangenome Consortium
AAGC032170D	Miao	East Asia	NGS	Y	Chinese Pangenome Consortium
AAGC032171D	Miao	East Asia	NGS	Y	Chinese Pangenome Consortium
AAGC032172D	Miao	East Asia	NGS	Y	Chinese Pangenome Consortium
AAGC032173D	Miao	East Asia	NGS	Y	Chinese Pangenome Consortium
AAGC032174D	Miao	East Asia	NGS	Y	Chinese Pangenome Consortium
AAGC032175D	Miao	East Asia	NGS	Y	Chinese Pangenome Consortium
AAGC032176D	Miao	East Asia	NGS	Y	Chinese Pangenome Consortium
AAGC032177D	Miao	East Asia	NGS	Y	Chinese Pangenome Consortium
AAGC032178D	Miao	East Asia	NGS	Y	Chinese Pangenome Consortium
AAGC032179D	Miao	East Asia	NGS	Y	Chinese Pangenome Consortium
AAGC032180D	Miao	East Asia	NGS	Y	Chinese Pangenome Consortium
AAGC032228D	Miao	East Asia	NGS	Y	Chinese Pangenome Consortium
AAGC032229D	Miao	East Asia	NGS	Y	Chinese Pangenome Consortium
AAGC032230D	Miao	East Asia	NGS	Y	Chinese Pangenome Consortium
AAGC032543D	Miao	East Asia	NGS	Y	Chinese Pangenome Consortium
HGDP01191	Miao	East Asia	NGS	Y	HGDP
HGDP01193	Miao	East Asia	NGS	Y	HGDP
HGDP01194	Miao	East Asia	NGS	Y	HGDP
HGDP01198	Miao	East Asia	NGS	Y	HGDP
AAGC032111D	Mongol	East Asia	NGS	Y	Chinese Pangenome Consortium
AAGC032112D	Mongol	East Asia	NGS	Y	Chinese Pangenome Consortium
AAGC032164D	Mongol	East Asia	NGS	Y	Chinese Pangenome Consortium
AAGC032222D	Mongol	East Asia	NGS	Y	Chinese Pangenome Consortium
AAGC032223D	Mongol	East Asia	NGS	Y	Chinese Pangenome Consortium
AAGC032224D	Mongol	East Asia	NGS	Y	Chinese Pangenome Consortium
AAGC032225D	Mongol	East Asia	NGS	Y	Chinese Pangenome Consortium
AAGC032226D	Mongol	East Asia	NGS	Y	Chinese Pangenome Consortium
AAGC032227D	Mongol	East Asia	NGS	Y	Chinese Pangenome Consortium
AAGC032356D	Mongol	East Asia	NGS	Y	Chinese Pangenome Consortium
AAGC032357D	Mongol	East Asia	NGS	Y	Chinese Pangenome Consortium
AAGC032379D	Mongol	East Asia	NGS	Y	Chinese Pangenome Consortium
AAGC032380D	Mongol	East Asia	NGS	Y	Chinese Pangenome Consortium
AAGC032381D	Mongol	East Asia	NGS	Y	Chinese Pangenome Consortium
AAGC032579D	Mongol	East Asia	NGS	Y	Chinese Pangenome Consortium
AAGC032607D	Mongol	East Asia	NGS	Y	Chinese Pangenome Consortium
AAGC032608D	Mongol	East Asia	NGS	Y	Chinese Pangenome Consortium
AAGC032664D	Mongol	East Asia	NGS	Y	Chinese Pangenome Consortium
AAGC032696D	Mongol	East Asia	NGS	Y	Chinese Pangenome Consortium
AAGC032697D	Mongol	East Asia	NGS	Y	Chinese Pangenome Consortium
HGDP01223	Mongol	East Asia	NGS	Y	HGDP
HGDP01224	Mongol	East Asia	NGS	Y	HGDP
HGDP01225	Mongol	East Asia	NGS	Y	HGDP
HGDP01226	Mongol	East Asia	NGS	Y	HGDP
HGDP01227	Mongol	East Asia	NGS	Y	HGDP
HGDP01228	Mongol	East Asia	NGS	Y	HGDP
HGDP01229	Mongol	East Asia	NGS	Y	HGDP
HGDP01230	Mongol	East Asia	NGS	Y	HGDP
HGDP01231	Mongol	East Asia	NGS	Y	HGDP
HGDP01232	Mongol	East Asia	NGS	Y	HGDP
AAGC032089D	Mosuo	East Asia	NGS	Y	Chinese Pangenome Consortium
AAGC032090D	Mosuo	East Asia	NGS	Y	Chinese Pangenome Consortium
AAGC032091D	Mosuo	East Asia	NGS	Y	Chinese Pangenome Consortium
AAGC032092D	Mosuo	East Asia	NGS	Y	Chinese Pangenome Consortium
AAGC032093D	Mosuo	East Asia	NGS	Y	Chinese Pangenome Consortium
AAGC032094D	Mosuo	East Asia	NGS	Y	Chinese Pangenome Consortium
AAGC032095D	Mosuo	East Asia	NGS	Y	Chinese Pangenome Consortium
AAGC032159D	Mosuo	East Asia	NGS	Y	Chinese Pangenome Consortium
AAGC032160D	Mosuo	East Asia	NGS	Y	Chinese Pangenome Consortium
AAGC032161D	Mosuo	East Asia	NGS	Y	Chinese Pangenome Consortium
AAGC032421D	Mosuo	East Asia	NGS	Y	Chinese Pangenome Consortium
AAGC032422D	Mosuo	East Asia	NGS	Y	Chinese Pangenome Consortium
AAGC032456D	Mosuo	East Asia	NGS	Y	Chinese Pangenome Consortium
AAGC032457D	Mosuo	East Asia	NGS	Y	Chinese Pangenome Consortium
AAGC032458D	Mosuo	East Asia	NGS	Y	Chinese Pangenome Consortium
AAGC032459D	Mosuo	East Asia	NGS	Y	Chinese Pangenome Consortium
AAGC032460D	Mosuo	East Asia	NGS	Y	Chinese Pangenome Consortium
AAGC032501D	Mosuo	East Asia	NGS	Y	Chinese Pangenome Consortium
AAGC032597D	Mosuo	East Asia	NGS	Y	Chinese Pangenome Consortium
AAGC032189D	Mulam	East Asia	NGS	Y	Chinese Pangenome Consortium
AAGC032191D	Mulam	East Asia	NGS	Y	Chinese Pangenome Consortium
AAGC032200D	Mulam	East Asia	NGS	Y	Chinese Pangenome Consortium
AAGC032201D	Mulam	East Asia	NGS	Y	Chinese Pangenome Consortium
AAGC032202D	Mulam	East Asia	NGS	Y	Chinese Pangenome Consortium
AAGC032203D	Mulam	East Asia	NGS	Y	Chinese Pangenome Consortium
AAGC032204D	Mulam	East Asia	NGS	Y	Chinese Pangenome Consortium
AAGC032206D	Mulam	East Asia	NGS	Y	Chinese Pangenome Consortium
AAGC032262D	Mulam	East Asia	NGS	Y	Chinese Pangenome Consortium
AAGC032045D	Naxi	East Asia	NGS	Y	Chinese Pangenome Consortium
AAGC032046D	Naxi	East Asia	NGS	Y	Chinese Pangenome Consortium
AAGC032132D	Naxi	East Asia	NGS	Y	Chinese Pangenome Consortium
AAGC032133D	Naxi	East Asia	NGS	Y	Chinese Pangenome Consortium
AAGC032155D	Naxi	East Asia	NGS	Y	Chinese Pangenome Consortium
AAGC032368D	Naxi	East Asia	NGS	Y	Chinese Pangenome Consortium
AAGC032588D	Naxi	East Asia	NGS	Y	Chinese Pangenome Consortium
AAGC032693D	Naxi	East Asia	NGS	Y	Chinese Pangenome Consortium
AAGC032694D	Naxi	East Asia	NGS	Y	Chinese Pangenome Consortium
HGDP01337	Naxi	East Asia	NGS	Y	HGDP
HGDP01338	Naxi	East Asia	NGS	Y	HGDP
HGDP01340	Naxi	East Asia	NGS	Y	HGDP
HGDP01341	Naxi	East Asia	NGS	Y	HGDP
HGDP01344	Naxi	East Asia	NGS	Y	HGDP
HGDP01345	Naxi	East Asia	NGS	Y	HGDP
HGDP01346	Naxi	East Asia	NGS	Y	HGDP
AAGC032110D	Nu	East Asia	NGS	Y	Chinese Pangenome Consortium
AAGC032233D	Nu	East Asia	NGS	Y	Chinese Pangenome Consortium
AAGC032275D	Nu	East Asia	NGS	Y	Chinese Pangenome Consortium
AAGC032276D	Nu	East Asia	NGS	Y	Chinese Pangenome Consortium
AAGC032277D	Nu	East Asia	NGS	Y	Chinese Pangenome Consortium
AAGC032278D	Nu	East Asia	NGS	Y	Chinese Pangenome Consortium
AAGC032279D	Nu	East Asia	NGS	Y	Chinese Pangenome Consortium
AAGC032280D	Nu	East Asia	NGS	Y	Chinese Pangenome Consortium
AAGC032295D	Nu	East Asia	NGS	Y	Chinese Pangenome Consortium
AAGC032296D	Nu	East Asia	NGS	Y	Chinese Pangenome Consortium
AAGC032310D	Nu	East Asia	NGS	Y	Chinese Pangenome Consortium
AAGC032311D	Nu	East Asia	NGS	Y	Chinese Pangenome Consortium
AAGC032327D	Nu	East Asia	NGS	Y	Chinese Pangenome Consortium
AAGC032466D	Nu	East Asia	NGS	Y	Chinese Pangenome Consortium
AAGC032508D	Nu	East Asia	NGS	Y	Chinese Pangenome Consortium
AAGC032509D	Nu	East Asia	NGS	Y	Chinese Pangenome Consortium
AAGC032576D	Nu	East Asia	NGS	Y	Chinese Pangenome Consortium
AAGC032577D	Nu	East Asia	NGS	Y	Chinese Pangenome Consortium
AAGC032578D	Nu	East Asia	NGS	Y	Chinese Pangenome Consortium
AAGC032606D	Nu	East Asia	NGS	Y	Chinese Pangenome Consortium
AAGC032036D	Pumi	East Asia	NGS	Y	Chinese Pangenome Consortium
AAGC032037D	Pumi	East Asia	NGS	Y	Chinese Pangenome Consortium
AAGC032038D	Pumi	East Asia	NGS	Y	Chinese Pangenome Consortium
AAGC032039D	Pumi	East Asia	NGS	Y	Chinese Pangenome Consortium
AAGC032040D	Pumi	East Asia	NGS	Y	Chinese Pangenome Consortium
AAGC032041D	Pumi	East Asia	NGS	Y	Chinese Pangenome Consortium
AAGC032042D	Pumi	East Asia	NGS	Y	Chinese Pangenome Consortium
AAGC032043D	Pumi	East Asia	NGS	Y	Chinese Pangenome Consortium
AAGC032086D	Pumi	East Asia	NGS	Y	Chinese Pangenome Consortium
AAGC032328D	Pumi	East Asia	NGS	Y	Chinese Pangenome Consortium
AAGC032329D	Pumi	East Asia	NGS	Y	Chinese Pangenome Consortium
AAGC032392D	Pumi	East Asia	NGS	Y	Chinese Pangenome Consortium
AAGC032393D	Pumi	East Asia	NGS	Y	Chinese Pangenome Consortium
AAGC032394D	Pumi	East Asia	NGS	Y	Chinese Pangenome Consortium
AAGC032424D	Pumi	East Asia	NGS	Y	Chinese Pangenome Consortium
AAGC032426D	Pumi	East Asia	NGS	Y	Chinese Pangenome Consortium
AAGC032060D	Qiang	East Asia	NGS	Y	Chinese Pangenome Consortium
AAGC032061D	Qiang	East Asia	NGS	Y	Chinese Pangenome Consortium
AAGC032062D	Qiang	East Asia	NGS	Y	Chinese Pangenome Consortium
AAGC032063D	Qiang	East Asia	NGS	Y	Chinese Pangenome Consortium
AAGC032157D	Qiang	East Asia	NGS	Y	Chinese Pangenome Consortium
AAGC032158D	Qiang	East Asia	NGS	Y	Chinese Pangenome Consortium
AAGC032420D	Qiang	East Asia	NGS	Y	Chinese Pangenome Consortium
AAGC032554D	Qiang	East Asia	NGS	Y	Chinese Pangenome Consortium
AAGC032555D	Qiang	East Asia	NGS	Y	Chinese Pangenome Consortium
AAGC032556D	Qiang	East Asia	NGS	Y	Chinese Pangenome Consortium
AAGC032557D	Qiang	East Asia	NGS	Y	Chinese Pangenome Consortium
AAGC032567D	Qiang	East Asia	NGS	Y	Chinese Pangenome Consortium
AAGC032568D	Qiang	East Asia	NGS	Y	Chinese Pangenome Consortium
AAGC032569D	Qiang	East Asia	NGS	Y	Chinese Pangenome Consortium
AAGC032570D	Qiang	East Asia	NGS	Y	Chinese Pangenome Consortium
AAGC032660D	Qiang	East Asia	NGS	Y	Chinese Pangenome Consortium
AAGC032661D	Qiang	East Asia	NGS	Y	Chinese Pangenome Consortium
AAGC032662D	Qiang	East Asia	NGS	Y	Chinese Pangenome Consortium
AAGC032663D	Qiang	East Asia	NGS	Y	Chinese Pangenome Consortium
AAGC032695D	Qiang	East Asia	NGS	Y	Chinese Pangenome Consortium
AAGC032084D	Salar	East Asia	NGS	Y	Chinese Pangenome Consortium
AAGC032152D	Salar	East Asia	NGS	Y	Chinese Pangenome Consortium
AAGC032153D	Salar	East Asia	NGS	Y	Chinese Pangenome Consortium
AAGC032154D	Salar	East Asia	NGS	Y	Chinese Pangenome Consortium
AAGC032282D	Salar	East Asia	NGS	Y	Chinese Pangenome Consortium
AAGC032321D	Salar	East Asia	NGS	Y	Chinese Pangenome Consortium
AAGC032344D	Salar	East Asia	NGS	Y	Chinese Pangenome Consortium
AAGC032367D	Salar	East Asia	NGS	Y	Chinese Pangenome Consortium
AAGC032413D	Salar	East Asia	NGS	Y	Chinese Pangenome Consortium
AAGC032414D	Salar	East Asia	NGS	Y	Chinese Pangenome Consortium
AAGC032415D	Salar	East Asia	NGS	Y	Chinese Pangenome Consortium
AAGC032416D	Salar	East Asia	NGS	Y	Chinese Pangenome Consortium
AAGC032417D	Salar	East Asia	NGS	Y	Chinese Pangenome Consortium
AAGC032418D	Salar	East Asia	NGS	Y	Chinese Pangenome Consortium
AAGC032452D	Salar	East Asia	NGS	Y	Chinese Pangenome Consortium
AAGC032453D	Salar	East Asia	NGS	Y	Chinese Pangenome Consortium
AAGC032535D	Salar	East Asia	NGS	Y	Chinese Pangenome Consortium
AAGC032586D	Salar	East Asia	NGS	Y	Chinese Pangenome Consortium
AAGC032587D	Salar	East Asia	NGS	Y	Chinese Pangenome Consortium
AAGC032618D	Salar	East Asia	NGS	Y	Chinese Pangenome Consortium
AAGC032057D	She	East Asia	NGS	Y	Chinese Pangenome Consortium
AAGC032285D	She	East Asia	NGS	Y	Chinese Pangenome Consortium
AAGC032301D	She	East Asia	NGS	Y	Chinese Pangenome Consortium
AAGC032302D	She	East Asia	NGS	Y	Chinese Pangenome Consortium
AAGC032591D	She	East Asia	NGS	Y	Chinese Pangenome Consortium
AAGC032592D	She	East Asia	NGS	Y	Chinese Pangenome Consortium
AAGC032593D	She	East Asia	NGS	Y	Chinese Pangenome Consortium
AAGC032621D	She	East Asia	NGS	Y	Chinese Pangenome Consortium
AAGC032622D	She	East Asia	NGS	Y	Chinese Pangenome Consortium
AAGC032623D	She	East Asia	NGS	Y	Chinese Pangenome Consortium
HGDP01329	She	East Asia	NGS	Y	HGDP
HGDP01331	She	East Asia	NGS	Y	HGDP
HGDP01333	She	East Asia	NGS	Y	HGDP
HGDP01335	She	East Asia	NGS	Y	HGDP
HGDP01336	She	East Asia	NGS	Y	HGDP
AAGC032052D	Shui	East Asia	NGS	Y	Chinese Pangenome Consortium
AAGC032053D	Shui	East Asia	NGS	Y	Chinese Pangenome Consortium
AAGC032055D	Shui	East Asia	NGS	Y	Chinese Pangenome Consortium
AAGC032056D	Shui	East Asia	NGS	Y	Chinese Pangenome Consortium
AAGC032264D	Shui	East Asia	NGS	Y	Chinese Pangenome Consortium
AAGC032265D	Shui	East Asia	NGS	Y	Chinese Pangenome Consortium
AAGC032266D	Shui	East Asia	NGS	Y	Chinese Pangenome Consortium
AAGC032267D	Shui	East Asia	NGS	Y	Chinese Pangenome Consortium
AAGC032268D	Shui	East Asia	NGS	Y	Chinese Pangenome Consortium
AAGC032283D	Shui	East Asia	NGS	Y	Chinese Pangenome Consortium
AAGC032284D	Shui	East Asia	NGS	Y	Chinese Pangenome Consortium
AAGC032300D	Shui	East Asia	NGS	Y	Chinese Pangenome Consortium
AAGC032372D	Shui	East Asia	NGS	Y	Chinese Pangenome Consortium
AAGC032388D	Shui	East Asia	NGS	Y	Chinese Pangenome Consortium
AAGC032389D	Shui	East Asia	NGS	Y	Chinese Pangenome Consortium
AAGC032590D	Shui	East Asia	NGS	Y	Chinese Pangenome Consortium
AAGC022051D	Tibetan	East Asia	NGS	Y	Chinese Pangenome Consortium
AAGC022052D	Tibetan	East Asia	NGS	Y	Chinese Pangenome Consortium
AAGC022053D	Tibetan	East Asia	NGS	Y	Chinese Pangenome Consortium
AAGC022054D	Tibetan	East Asia	NGS	Y	Chinese Pangenome Consortium
AAGC022055D	Tibetan	East Asia	NGS	Y	Chinese Pangenome Consortium
AAGC022056D	Tibetan	East Asia	NGS	Y	Chinese Pangenome Consortium
AAGC022057D	Tibetan	East Asia	NGS	Y	Chinese Pangenome Consortium
AAGC022058D	Tibetan	East Asia	NGS	Y	Chinese Pangenome Consortium
AAGC022059D	Tibetan	East Asia	NGS	Y	Chinese Pangenome Consortium
AAGC022060D	Tibetan	East Asia	NGS	Y	Chinese Pangenome Consortium
AAGC022061D	Tibetan	East Asia	NGS	Y	Chinese Pangenome Consortium
AAGC022062D	Tibetan	East Asia	NGS	Y	Chinese Pangenome Consortium
AAGC022063D	Tibetan	East Asia	NGS	Y	Chinese Pangenome Consortium
AAGC022064D	Tibetan	East Asia	NGS	Y	Chinese Pangenome Consortium
AAGC022065D	Tibetan	East Asia	NGS	Y	Chinese Pangenome Consortium
AAGC022066D	Tibetan	East Asia	NGS	Y	Chinese Pangenome Consortium
AAGC022067D	Tibetan	East Asia	NGS	Y	Chinese Pangenome Consortium
AAGC022068D	Tibetan	East Asia	NGS	Y	Chinese Pangenome Consortium
AAGC022069D	Tibetan	East Asia	NGS	Y	Chinese Pangenome Consortium
AAGC022070D	Tibetan	East Asia	NGS	Y	Chinese Pangenome Consortium
AAGC022071D	Tibetan	East Asia	NGS	Y	Chinese Pangenome Consortium
AAGC022077D	Tibetan	East Asia	NGS	Y	Chinese Pangenome Consortium
AAGC022078D	Tibetan	East Asia	NGS	Y	Chinese Pangenome Consortium
AAGC022079D	Tibetan	East Asia	NGS	Y	Chinese Pangenome Consortium
AAGC022080D	Tibetan	East Asia	NGS	Y	Chinese Pangenome Consortium
AAGC022107D	Tibetan	East Asia	NGS	Y	Chinese Pangenome Consortium
AAGC022108D	Tibetan	East Asia	NGS	Y	Chinese Pangenome Consortium
AAGC022109D	Tibetan	East Asia	NGS	Y	Chinese Pangenome Consortium
AAGC022110D	Tibetan	East Asia	NGS	Y	Chinese Pangenome Consortium
AAGC022111D	Tibetan	East Asia	NGS	Y	Chinese Pangenome Consortium
AAGC022112D	Tibetan	East Asia	NGS	Y	Chinese Pangenome Consortium
AAGC022113D	Tibetan	East Asia	NGS	Y	Chinese Pangenome Consortium
AAGC022114D	Tibetan	East Asia	NGS	Y	Chinese Pangenome Consortium
AAGC032322D	Tu	East Asia	NGS	Y	Chinese Pangenome Consortium
AAGC032323D	Tu	East Asia	NGS	Y	Chinese Pangenome Consortium
AAGC032325D	Tu	East Asia	NGS	Y	Chinese Pangenome Consortium
AAGC032345D	Tu	East Asia	NGS	Y	Chinese Pangenome Consortium
AAGC032346D	Tu	East Asia	NGS	Y	Chinese Pangenome Consortium
AAGC032347D	Tu	East Asia	NGS	Y	Chinese Pangenome Consortium
AAGC032348D	Tu	East Asia	NGS	Y	Chinese Pangenome Consortium
AAGC032349D	Tu	East Asia	NGS	Y	Chinese Pangenome Consortium
AAGC032369D	Tu	East Asia	NGS	Y	Chinese Pangenome Consortium
AAGC032370D	Tu	East Asia	NGS	Y	Chinese Pangenome Consortium
AAGC032371D	Tu	East Asia	NGS	Y	Chinese Pangenome Consortium
AAGC032385D	Tu	East Asia	NGS	Y	Chinese Pangenome Consortium
AAGC032386D	Tu	East Asia	NGS	Y	Chinese Pangenome Consortium
AAGC032387D	Tu	East Asia	NGS	Y	Chinese Pangenome Consortium
AAGC032419D	Tu	East Asia	NGS	Y	Chinese Pangenome Consortium
AAGC032454D	Tu	East Asia	NGS	Y	Chinese Pangenome Consortium
AAGC032455D	Tu	East Asia	NGS	Y	Chinese Pangenome Consortium
AAGC032495D	Tu	East Asia	NGS	Y	Chinese Pangenome Consortium
AAGC032536D	Tu	East Asia	NGS	Y	Chinese Pangenome Consortium
HGDP01347	Tu	East Asia	NGS	Y	HGDP
HGDP01348	Tu	East Asia	NGS	Y	HGDP
HGDP01350	Tu	East Asia	NGS	Y	HGDP
HGDP01351	Tu	East Asia	NGS	Y	HGDP
HGDP01352	Tu	East Asia	NGS	Y	HGDP
HGDP01355	Tu	East Asia	NGS	Y	HGDP
AAGC031920D	Tujia	East Asia	NGS	Y	Chinese Pangenome Consortium
AAGC032096D	Tujia	East Asia	NGS	Y	Chinese Pangenome Consortium
AAGC032097D	Tujia	East Asia	NGS	Y	Chinese Pangenome Consortium
AAGC032098D	Tujia	East Asia	NGS	Y	Chinese Pangenome Consortium
AAGC032099D	Tujia	East Asia	NGS	Y	Chinese Pangenome Consortium
AAGC032100D	Tujia	East Asia	NGS	Y	Chinese Pangenome Consortium
AAGC032101D	Tujia	East Asia	NGS	Y	Chinese Pangenome Consortium
AAGC032102D	Tujia	East Asia	NGS	Y	Chinese Pangenome Consortium
AAGC032103D	Tujia	East Asia	NGS	Y	Chinese Pangenome Consortium
AAGC032104D	Tujia	East Asia	NGS	Y	Chinese Pangenome Consortium
AAGC032105D	Tujia	East Asia	NGS	Y	Chinese Pangenome Consortium
AAGC032163D	Tujia	East Asia	NGS	Y	Chinese Pangenome Consortium
AAGC032218D	Tujia	East Asia	NGS	Y	Chinese Pangenome Consortium
AAGC032219D	Tujia	East Asia	NGS	Y	Chinese Pangenome Consortium
AAGC032220D	Tujia	East Asia	NGS	Y	Chinese Pangenome Consortium
AAGC032221D	Tujia	East Asia	NGS	Y	Chinese Pangenome Consortium
HGDP01096	Tujia	East Asia	NGS	Y	HGDP
HGDP01097	Tujia	East Asia	NGS	Y	HGDP
HGDP01099	Tujia	East Asia	NGS	Y	HGDP
HGDP01100	Tujia	East Asia	NGS	Y	HGDP
HGDP01101	Tujia	East Asia	NGS	Y	HGDP
HGDP01102	Tujia	East Asia	NGS	Y	HGDP
HGDP01103	Tujia	East Asia	NGS	Y	HGDP
HGDP01104	Tujia	East Asia	NGS	Y	HGDP
AAGC021959D	Uygur	East Asia	NGS	Y	Chinese Pangenome Consortium
AAGC021960D	Uygur	East Asia	NGS	Y	Chinese Pangenome Consortium
AAGC021961D	Uygur	East Asia	NGS	Y	Chinese Pangenome Consortium
AAGC021962D	Uygur	East Asia	NGS	Y	Chinese Pangenome Consortium
AAGC021963D	Uygur	East Asia	NGS	Y	Chinese Pangenome Consortium
AAGC021964D	Uygur	East Asia	NGS	Y	Chinese Pangenome Consortium
AAGC021965D	Uygur	East Asia	NGS	Y	Chinese Pangenome Consortium
AAGC021966D	Uygur	East Asia	NGS	Y	Chinese Pangenome Consortium
AAGC021967D	Uygur	East Asia	NGS	Y	Chinese Pangenome Consortium
AAGC021968D	Uygur	East Asia	NGS	Y	Chinese Pangenome Consortium
AAGC021969D	Uygur	East Asia	NGS	Y	Chinese Pangenome Consortium
AAGC021970D	Uygur	East Asia	NGS	Y	Chinese Pangenome Consortium
AAGC021971D	Uygur	East Asia	NGS	Y	Chinese Pangenome Consortium
AAGC021972D	Uygur	East Asia	NGS	Y	Chinese Pangenome Consortium
AAGC021973D	Uygur	East Asia	NGS	Y	Chinese Pangenome Consortium
AAGC021974D	Uygur	East Asia	NGS	Y	Chinese Pangenome Consortium
AAGC021975D	Uygur	East Asia	NGS	Y	Chinese Pangenome Consortium
AAGC021976D	Uygur	East Asia	NGS	Y	Chinese Pangenome Consortium
AAGC021977D	Uygur	East Asia	NGS	Y	Chinese Pangenome Consortium
AAGC021978D	Uygur	East Asia	NGS	Y	Chinese Pangenome Consortium
AAGC021979D	Uygur	East Asia	NGS	Y	Chinese Pangenome Consortium
AAGC021980D	Uygur	East Asia	NGS	Y	Chinese Pangenome Consortium
AAGC021981D	Uygur	East Asia	NGS	Y	Chinese Pangenome Consortium
AAGC021982D	Uygur	East Asia	NGS	Y	Chinese Pangenome Consortium
AAGC021983D	Uygur	East Asia	NGS	Y	Chinese Pangenome Consortium
AAGC021984D	Uygur	East Asia	NGS	Y	Chinese Pangenome Consortium
AAGC021985D	Uygur	East Asia	NGS	Y	Chinese Pangenome Consortium
AAGC021986D	Uygur	East Asia	NGS	Y	Chinese Pangenome Consortium
AAGC021987D	Uygur	East Asia	NGS	Y	Chinese Pangenome Consortium
AAGC021988D	Uygur	East Asia	NGS	Y	Chinese Pangenome Consortium
AAGC021989D	Uygur	East Asia	NGS	Y	Chinese Pangenome Consortium
AAGC021990D	Uygur	East Asia	NGS	Y	Chinese Pangenome Consortium
AAGC021991D	Uygur	East Asia	NGS	Y	Chinese Pangenome Consortium
AAGC021992D	Uygur	East Asia	NGS	Y	Chinese Pangenome Consortium
AAGC021993D	Uygur	East Asia	NGS	Y	Chinese Pangenome Consortium
AAGC021994D	Uygur	East Asia	NGS	Y	Chinese Pangenome Consortium
AAGC021995D	Uygur	East Asia	NGS	Y	Chinese Pangenome Consortium
AAGC021996D	Uygur	East Asia	NGS	Y	Chinese Pangenome Consortium
AAGC021997D	Uygur	East Asia	NGS	Y	Chinese Pangenome Consortium
AAGC021998D	Uygur	East Asia	NGS	Y	Chinese Pangenome Consortium
AAGC021999D	Uygur	East Asia	NGS	Y	Chinese Pangenome Consortium
AAGC022000D	Uygur	East Asia	NGS	Y	Chinese Pangenome Consortium
AAGC022008D	Uygur	East Asia	NGS	Y	Chinese Pangenome Consortium
AAGC022009D	Uygur	East Asia	NGS	Y	Chinese Pangenome Consortium
AAGC022010D	Uygur	East Asia	NGS	Y	Chinese Pangenome Consortium
AAGC022011D	Uygur	East Asia	NGS	Y	Chinese Pangenome Consortium
AAGC022012D	Uygur	East Asia	NGS	Y	Chinese Pangenome Consortium
AAGC022013D	Uygur	East Asia	NGS	Y	Chinese Pangenome Consortium
AAGC022014D	Uygur	East Asia	NGS	Y	Chinese Pangenome Consortium
AAGC022015D	Uygur	East Asia	NGS	Y	Chinese Pangenome Consortium
AAGC022016D	Uygur	East Asia	NGS	Y	Chinese Pangenome Consortium
AAGC022017D	Uygur	East Asia	NGS	Y	Chinese Pangenome Consortium
AAGC022018D	Uygur	East Asia	NGS	Y	Chinese Pangenome Consortium
AAGC022019D	Uygur	East Asia	NGS	Y	Chinese Pangenome Consortium
AAGC022020D	Uygur	East Asia	NGS	Y	Chinese Pangenome Consortium
AAGC022021D	Uygur	East Asia	NGS	Y	Chinese Pangenome Consortium
AAGC022022D	Uygur	East Asia	NGS	Y	Chinese Pangenome Consortium
AAGC022023D	Uygur	East Asia	NGS	Y	Chinese Pangenome Consortium
AAGC022024D	Uygur	East Asia	NGS	Y	Chinese Pangenome Consortium
AAGC022025D	Uygur	East Asia	NGS	Y	Chinese Pangenome Consortium
AAGC022026D	Uygur	East Asia	NGS	Y	Chinese Pangenome Consortium
AAGC022027D	Uygur	East Asia	NGS	Y	Chinese Pangenome Consortium
AAGC022028D	Uygur	East Asia	NGS	Y	Chinese Pangenome Consortium
AAGC022029D	Uygur	East Asia	NGS	Y	Chinese Pangenome Consortium
AAGC022030D	Uygur	East Asia	NGS	Y	Chinese Pangenome Consortium
AAGC022031D	Uygur	East Asia	NGS	Y	Chinese Pangenome Consortium
AAGC022032D	Uygur	East Asia	NGS	Y	Chinese Pangenome Consortium
AAGC022033D	Uygur	East Asia	NGS	Y	Chinese Pangenome Consortium
AAGC022034D	Uygur	East Asia	NGS	Y	Chinese Pangenome Consortium
AAGC022035D	Uygur	East Asia	NGS	Y	Chinese Pangenome Consortium
AAGC022036D	Uygur	East Asia	NGS	Y	Chinese Pangenome Consortium
AAGC022037D	Uygur	East Asia	NGS	Y	Chinese Pangenome Consortium
AAGC022038D	Uygur	East Asia	NGS	Y	Chinese Pangenome Consortium
AAGC022040D	Uygur	East Asia	NGS	Y	Chinese Pangenome Consortium
AAGC022041D	Uygur	East Asia	NGS	Y	Chinese Pangenome Consortium
AAGC022042D	Uygur	East Asia	NGS	Y	Chinese Pangenome Consortium
AAGC022043D	Uygur	East Asia	NGS	Y	Chinese Pangenome Consortium
AAGC022044D	Uygur	East Asia	NGS	Y	Chinese Pangenome Consortium
AAGC022045D	Uygur	East Asia	NGS	Y	Chinese Pangenome Consortium
AAGC022046D	Uygur	East Asia	NGS	Y	Chinese Pangenome Consortium
AAGC022047D	Uygur	East Asia	NGS	Y	Chinese Pangenome Consortium
AAGC022048D	Uygur	East Asia	NGS	Y	Chinese Pangenome Consortium
AAGC022049D	Uygur	East Asia	NGS	Y	Chinese Pangenome Consortium
AAGC022050D	Uygur	East Asia	NGS	Y	Chinese Pangenome Consortium
HGDP01297	Uygur	East Asia	NGS	Y	HGDP
HGDP01298	Uygur	East Asia	NGS	Y	HGDP
HGDP01299	Uygur	East Asia	NGS	Y	HGDP
HGDP01300	Uygur	East Asia	NGS	Y	HGDP
HGDP01301	Uygur	East Asia	NGS	Y	HGDP
HGDP01302	Uygur	East Asia	NGS	Y	HGDP
HGDP01303	Uygur	East Asia	NGS	Y	HGDP
HGDP01304	Uygur	East Asia	NGS	Y	HGDP
HGDP01305	Uygur	East Asia	NGS	Y	HGDP
HGDP01306	Uygur	East Asia	NGS	Y	HGDP
AAGC032207D	Wa	East Asia	NGS	Y	Chinese Pangenome Consortium
AAGC032208D	Wa	East Asia	NGS	Y	Chinese Pangenome Consortium
AAGC032210D	Wa	East Asia	NGS	Y	Chinese Pangenome Consortium
AAGC032211D	Wa	East Asia	NGS	Y	Chinese Pangenome Consortium
AAGC032212D	Wa	East Asia	NGS	Y	Chinese Pangenome Consortium
AAGC032213D	Wa	East Asia	NGS	Y	Chinese Pangenome Consortium
AAGC032214D	Wa	East Asia	NGS	Y	Chinese Pangenome Consortium
AAGC032215D	Wa	East Asia	NGS	Y	Chinese Pangenome Consortium
AAGC032216D	Wa	East Asia	NGS	Y	Chinese Pangenome Consortium
AAGC032490D	Wa	East Asia	NGS	Y	Chinese Pangenome Consortium
AAGC032491D	Wa	East Asia	NGS	Y	Chinese Pangenome Consortium
AAGC032492D	Wa	East Asia	NGS	Y	Chinese Pangenome Consortium
AAGC032493D	Wa	East Asia	NGS	Y	Chinese Pangenome Consortium
AAGC032527D	Wa	East Asia	NGS	Y	Chinese Pangenome Consortium
AAGC032528D	Wa	East Asia	NGS	Y	Chinese Pangenome Consortium
AAGC032529D	Wa	East Asia	NGS	Y	Chinese Pangenome Consortium
AAGC032530D	Wa	East Asia	NGS	Y	Chinese Pangenome Consortium
AAGC032711D	Wa	East Asia	NGS	Y	Chinese Pangenome Consortium
HGDP01243	Xibo	East Asia	NGS	Y	HGDP
HGDP01244	Xibo	East Asia	NGS	Y	HGDP
HGDP01245	Xibo	East Asia	NGS	Y	HGDP
HGDP01246	Xibo	East Asia	NGS	Y	HGDP
HGDP01247	Xibo	East Asia	NGS	Y	HGDP
HGDP01248	Xibo	East Asia	NGS	Y	HGDP
HGDP01249	Xibo	East Asia	NGS	Y	HGDP
HGDP01250	Xibo	East Asia	NGS	Y	HGDP
HGDP01251	Xibo	East Asia	NGS	Y	HGDP
AAGC031716D	Yao	East Asia	NGS	Y	Chinese Pangenome Consortium
AAGC031717D	Yao	East Asia	NGS	Y	Chinese Pangenome Consortium
AAGC031718D	Yao	East Asia	NGS	Y	Chinese Pangenome Consortium
AAGC031719D	Yao	East Asia	NGS	Y	Chinese Pangenome Consortium
AAGC031720D	Yao	East Asia	NGS	Y	Chinese Pangenome Consortium
AAGC031721D	Yao	East Asia	NGS	Y	Chinese Pangenome Consortium
AAGC031722D	Yao	East Asia	NGS	Y	Chinese Pangenome Consortium
AAGC031723D	Yao	East Asia	NGS	Y	Chinese Pangenome Consortium
AAGC031724D	Yao	East Asia	NGS	Y	Chinese Pangenome Consortium
AAGC031725D	Yao	East Asia	NGS	Y	Chinese Pangenome Consortium
AAGC031726D	Yao	East Asia	NGS	Y	Chinese Pangenome Consortium
AAGC031728D	Yao	East Asia	NGS	Y	Chinese Pangenome Consortium
AAGC031729D	Yao	East Asia	NGS	Y	Chinese Pangenome Consortium
AAGC031730D	Yao	East Asia	NGS	Y	Chinese Pangenome Consortium
AAGC031732D	Yao	East Asia	NGS	Y	Chinese Pangenome Consortium
AAGC031733D	Yao	East Asia	NGS	Y	Chinese Pangenome Consortium
AAGC031734D	Yao	East Asia	NGS	Y	Chinese Pangenome Consortium
AAGC031735D	Yao	East Asia	NGS	Y	Chinese Pangenome Consortium
AAGC031736D	Yao	East Asia	NGS	Y	Chinese Pangenome Consortium
AAGC031737D	Yao	East Asia	NGS	Y	Chinese Pangenome Consortium
AAGC031738D	Yao	East Asia	NGS	Y	Chinese Pangenome Consortium
AAGC031739D	Yao	East Asia	NGS	Y	Chinese Pangenome Consortium
AAGC031740D	Yao	East Asia	NGS	Y	Chinese Pangenome Consortium
AAGC031741D	Yao	East Asia	NGS	Y	Chinese Pangenome Consortium
AAGC031742D	Yao	East Asia	NGS	Y	Chinese Pangenome Consortium
AAGC031743D	Yao	East Asia	NGS	Y	Chinese Pangenome Consortium
AAGC031744D	Yao	East Asia	NGS	Y	Chinese Pangenome Consortium
AAGC031745D	Yao	East Asia	NGS	Y	Chinese Pangenome Consortium
AAGC031747D	Yao	East Asia	NGS	Y	Chinese Pangenome Consortium
AAGC031748D	Yao	East Asia	NGS	Y	Chinese Pangenome Consortium
AAGC031750D	Yao	East Asia	NGS	Y	Chinese Pangenome Consortium
AAGC031751D	Yao	East Asia	NGS	Y	Chinese Pangenome Consortium
AAGC031752D	Yao	East Asia	NGS	Y	Chinese Pangenome Consortium
AAGC031753D	Yao	East Asia	NGS	Y	Chinese Pangenome Consortium
AAGC031754D	Yao	East Asia	NGS	Y	Chinese Pangenome Consortium
AAGC031756D	Yao	East Asia	NGS	Y	Chinese Pangenome Consortium
AAGC031757D	Yao	East Asia	NGS	Y	Chinese Pangenome Consortium
AAGC031758D	Yao	East Asia	NGS	Y	Chinese Pangenome Consortium
AAGC031760D	Yao	East Asia	NGS	Y	Chinese Pangenome Consortium
AAGC031761D	Yao	East Asia	NGS	Y	Chinese Pangenome Consortium
AAGC031762D	Yao	East Asia	NGS	Y	Chinese Pangenome Consortium
AAGC031763D	Yao	East Asia	NGS	Y	Chinese Pangenome Consortium
AAGC031764D	Yao	East Asia	NGS	Y	Chinese Pangenome Consortium
AAGC031765D	Yao	East Asia	NGS	Y	Chinese Pangenome Consortium
AAGC031766D	Yao	East Asia	NGS	Y	Chinese Pangenome Consortium
AAGC031767D	Yao	East Asia	NGS	Y	Chinese Pangenome Consortium
AAGC031768D	Yao	East Asia	NGS	Y	Chinese Pangenome Consortium
AAGC031770D	Yao	East Asia	NGS	Y	Chinese Pangenome Consortium
AAGC031771D	Yao	East Asia	NGS	Y	Chinese Pangenome Consortium
AAGC031772D	Yao	East Asia	NGS	Y	Chinese Pangenome Consortium
AAGC031773D	Yao	East Asia	NGS	Y	Chinese Pangenome Consortium
AAGC031774D	Yao	East Asia	NGS	Y	Chinese Pangenome Consortium
AAGC031775D	Yao	East Asia	NGS	Y	Chinese Pangenome Consortium
AAGC031776D	Yao	East Asia	NGS	Y	Chinese Pangenome Consortium
AAGC031777D	Yao	East Asia	NGS	Y	Chinese Pangenome Consortium
AAGC031779D	Yao	East Asia	NGS	Y	Chinese Pangenome Consortium
AAGC031780D	Yao	East Asia	NGS	Y	Chinese Pangenome Consortium
AAGC031783D	Yao	East Asia	NGS	Y	Chinese Pangenome Consortium
AAGC031785D	Yao	East Asia	NGS	Y	Chinese Pangenome Consortium
AAGC031786D	Yao	East Asia	NGS	Y	Chinese Pangenome Consortium
AAGC031787D	Yao	East Asia	NGS	Y	Chinese Pangenome Consortium
AAGC031788D	Yao	East Asia	NGS	Y	Chinese Pangenome Consortium
AAGC031789D	Yao	East Asia	NGS	Y	Chinese Pangenome Consortium
AAGC031790D	Yao	East Asia	NGS	Y	Chinese Pangenome Consortium
AAGC031794D	Yao	East Asia	NGS	Y	Chinese Pangenome Consortium
AAGC031795D	Yao	East Asia	NGS	Y	Chinese Pangenome Consortium
AAGC032077D	Yi	East Asia	NGS	Y	Chinese Pangenome Consortium
AAGC032079D	Yi	East Asia	NGS	Y	Chinese Pangenome Consortium
AAGC032143D	Yi	East Asia	NGS	Y	Chinese Pangenome Consortium
AAGC032144D	Yi	East Asia	NGS	Y	Chinese Pangenome Consortium
AAGC032145D	Yi	East Asia	NGS	Y	Chinese Pangenome Consortium
AAGC032182D	Yi	East Asia	NGS	Y	Chinese Pangenome Consortium
AAGC032183D	Yi	East Asia	NGS	Y	Chinese Pangenome Consortium
AAGC032447D	Yi	East Asia	NGS	Y	Chinese Pangenome Consortium
HGDP01179	Yi	East Asia	NGS	Y	HGDP
HGDP01180	Yi	East Asia	NGS	Y	HGDP
HGDP01181	Yi	East Asia	NGS	Y	HGDP
HGDP01182	Yi	East Asia	NGS	Y	HGDP
HGDP01183	Yi	East Asia	NGS	Y	HGDP
HGDP01184	Yi	East Asia	NGS	Y	HGDP
HGDP01185	Yi	East Asia	NGS	Y	HGDP
HGDP01186	Yi	East Asia	NGS	Y	HGDP
HGDP01187	Yi	East Asia	NGS	Y	HGDP
HGDP01188	Yi	East Asia	NGS	Y	HGDP
AAGC032548D	Yugur	East Asia	NGS	Y	Chinese Pangenome Consortium
AAGC032549D	Yugur	East Asia	NGS	Y	Chinese Pangenome Consortium
AAGC032550D	Yugur	East Asia	NGS	Y	Chinese Pangenome Consortium
AAGC032551D	Yugur	East Asia	NGS	Y	Chinese Pangenome Consortium
AAGC032552D	Yugur	East Asia	NGS	Y	Chinese Pangenome Consortium
AAGC032553D	Yugur	East Asia	NGS	Y	Chinese Pangenome Consortium
AAGC032563D	Yugur	East Asia	NGS	Y	Chinese Pangenome Consortium
AAGC032564D	Yugur	East Asia	NGS	Y	Chinese Pangenome Consortium
AAGC032565D	Yugur	East Asia	NGS	Y	Chinese Pangenome Consortium
AAGC032566D	Yugur	East Asia	NGS	Y	Chinese Pangenome Consortium
AAGC032656D	Yugur	East Asia	NGS	Y	Chinese Pangenome Consortium
AAGC032657D	Yugur	East Asia	NGS	Y	Chinese Pangenome Consortium
AAGC032658D	Yugur	East Asia	NGS	Y	Chinese Pangenome Consortium
AAGC032659D	Yugur	East Asia	NGS	Y	Chinese Pangenome Consortium
AAGC032687D	Yugur	East Asia	NGS	Y	Chinese Pangenome Consortium
AAGC032688D	Yugur	East Asia	NGS	Y	Chinese Pangenome Consortium
AAGC032689D	Yugur	East Asia	NGS	Y	Chinese Pangenome Consortium
AAGC032690D	Yugur	East Asia	NGS	Y	Chinese Pangenome Consortium
AAGC032691D	Yugur	East Asia	NGS	Y	Chinese Pangenome Consortium
AAGC032692D	Yugur	East Asia	NGS	Y	Chinese Pangenome Consortium
AAGC032109D	Zhuang	East Asia	NGS	Y	Chinese Pangenome Consortium
AAGC032561D	Zhuang	East Asia	NGS	Y	Chinese Pangenome Consortium
AAGC032641D	Zhuang	East Asia	NGS	Y	Chinese Pangenome Consortium
AAGC032642D	Zhuang	East Asia	NGS	Y	Chinese Pangenome Consortium
AAGC032643D	Zhuang	East Asia	NGS	Y	Chinese Pangenome Consortium
AAGC032644D	Zhuang	East Asia	NGS	Y	Chinese Pangenome Consortium
AAGC032645D	Zhuang	East Asia	NGS	Y	Chinese Pangenome Consortium
AAGC032646D	Zhuang	East Asia	NGS	Y	Chinese Pangenome Consortium
AAGC032647D	Zhuang	East Asia	NGS	Y	Chinese Pangenome Consortium
AAGC032648D	Zhuang	East Asia	NGS	Y	Chinese Pangenome Consortium
AAGC032649D	Zhuang	East Asia	NGS	Y	Chinese Pangenome Consortium
AAGC032650D	Zhuang	East Asia	NGS	Y	Chinese Pangenome Consortium
AAGC032677D	Zhuang	East Asia	NGS	Y	Chinese Pangenome Consortium
AAGC032678D	Zhuang	East Asia	NGS	Y	Chinese Pangenome Consortium
AAGC032679D	Zhuang	East Asia	NGS	Y	Chinese Pangenome Consortium
AAGC032680D	Zhuang	East Asia	NGS	Y	Chinese Pangenome Consortium
AAGC032681D	Zhuang	East Asia	NGS	Y	Chinese Pangenome Consortium
AAGC032743D	Zhuang	East Asia	NGS	Y	Chinese Pangenome Consortium
AAGC032750D	Zhuang	East Asia	NGS	Y	Chinese Pangenome Consortium
AAGC022072D	Sherpa	EastAsia	NGS	Y	Chinese Pangenome Consortium
AAGC022073D	Sherpa	EastAsia	NGS	Y	Chinese Pangenome Consortium
AAGC022074D	Sherpa	EastAsia	NGS	Y	Chinese Pangenome Consortium
AAGC022075D	Sherpa	EastAsia	NGS	Y	Chinese Pangenome Consortium
AAGC022076D	Sherpa	EastAsia	NGS	Y	Chinese Pangenome Consortium
HGDP00491	Bougainville	Oceania	NGS	Y	HGDP
HGDP00655	Bougainville	Oceania	NGS	Y	HGDP
HGDP00661	Bougainville	Oceania	NGS	Y	HGDP
HGDP00662	Bougainville	Oceania	NGS	Y	HGDP
HGDP00664	Bougainville	Oceania	NGS	Y	HGDP
HGDP00787	Bougainville	Oceania	NGS	Y	HGDP
HGDP00788	Bougainville	Oceania	NGS	Y	HGDP
HGDP01027	Bougainville	Oceania	NGS	Y	HGDP
HGDP00549	PapuanHighlands	Oceania	NGS	Y	HGDP
HGDP00550	PapuanHighlands	Oceania	NGS	Y	HGDP
HGDP00551	PapuanHighlands	Oceania	NGS	Y	HGDP
HGDP00553	PapuanHighlands	Oceania	NGS	Y	HGDP
HGDP00555	PapuanHighlands	Oceania	NGS	Y	HGDP
HGDP00556	PapuanHighlands	Oceania	NGS	Y	HGDP
HGDP00540	PapuanSepik	Oceania	NGS	Y	HGDP
HGDP00541	PapuanSepik	Oceania	NGS	Y	HGDP
HGDP00542	PapuanSepik	Oceania	NGS	Y	HGDP
HGDP00543	PapuanSepik	Oceania	NGS	Y	HGDP
HGDP00544	PapuanSepik	Oceania	NGS	Y	HGDP
HGDP00545	PapuanSepik	Oceania	NGS	Y	HGDP
HGDP00546	PapuanSepik	Oceania	NGS	Y	HGDP
HGDP00547	PapuanSepik	Oceania	NGS	Y	HGDP
ADR00057	Chukchi	Siberia	SNP Array	N	Human Origin
ADR00059	Chukchi	Siberia	SNP Array	N	Human Origin
ADR00060	Chukchi	Siberia	SNP Array	N	Human Origin
ADR00061	Chukchi	Siberia	SNP Array	N	Human Origin
ADR00064	Chukchi	Siberia	SNP Array	N	Human Origin
ADR00065	Chukchi	Siberia	SNP Array	N	Human Origin
ADR00066	Chukchi	Siberia	SNP Array	N	Human Origin
ADR00068	Chukchi	Siberia	SNP Array	N	Human Origin
ADR00079	Chukchi	Siberia	SNP Array	N	Human Origin
MC_08	Chukchi	Siberia	SNP Array	N	Human Origin
MC_14	Chukchi	Siberia	SNP Array	N	Human Origin
MC_15	Chukchi	Siberia	SNP Array	N	Human Origin
MC_16	Chukchi	Siberia	SNP Array	N	Human Origin
MC_17	Chukchi	Siberia	SNP Array	N	Human Origin
MC_18	Chukchi	Siberia	SNP Array	N	Human Origin
MC_25	Chukchi	Siberia	SNP Array	N	Human Origin
MC_38	Chukchi	Siberia	SNP Array	N	Human Origin
MC_40	Chukchi	Siberia	SNP Array	N	Human Origin
Sir41	Chukchi	Siberia	SNP Array	N	Human Origin
ADR00089	Eskimo	Siberia	SNP Array	N	Human Origin
ADR00090	Eskimo	Siberia	SNP Array	N	Human Origin
ADR00092	Eskimo	Siberia	SNP Array	N	Human Origin
ADR00096	Eskimo	Siberia	SNP Array	N	Human Origin
ADR00098	Eskimo	Siberia	SNP Array	N	Human Origin
ADR00102	Eskimo	Siberia	SNP Array	N	Human Origin
Esk20	Eskimo	Siberia	SNP Array	N	Human Origin
Esk22	Eskimo	Siberia	SNP Array	N	Human Origin
Esk29	Eskimo	Siberia	SNP Array	N	Human Origin
Esk38	Eskimo	Siberia	SNP Array	N	Human Origin
Nesk_15	Eskimo	Siberia	SNP Array	N	Human Origin
Nesk_23	Eskimo	Siberia	SNP Array	N	Human Origin
Nesk_25	Eskimo	Siberia	SNP Array	N	Human Origin
Nesk19	Eskimo	Siberia	SNP Array	N	Human Origin
Nesk8	Eskimo	Siberia	SNP Array	N	Human Origin
Sir14	Eskimo	Siberia	SNP Array	N	Human Origin
Sir26	Eskimo	Siberia	SNP Array	N	Human Origin
Sir43	Eskimo	Siberia	SNP Array	N	Human Origin
Sir77	Eskimo	Siberia	SNP Array	N	Human Origin
Tuba1	Tubalar	Siberia	SNP Array	N	Human Origin
Tuba11	Tubalar	Siberia	SNP Array	N	Human Origin
Tuba12	Tubalar	Siberia	SNP Array	N	Human Origin
Tuba13	Tubalar	Siberia	SNP Array	N	Human Origin
Tuba15	Tubalar	Siberia	SNP Array	N	Human Origin
Tuba16	Tubalar	Siberia	SNP Array	N	Human Origin
Tuba17	Tubalar	Siberia	SNP Array	N	Human Origin
Tuba18	Tubalar	Siberia	SNP Array	N	Human Origin
Tuba19	Tubalar	Siberia	SNP Array	N	Human Origin
Tuba2	Tubalar	Siberia	SNP Array	N	Human Origin
Tuba20	Tubalar	Siberia	SNP Array	N	Human Origin
Tuba22	Tubalar	Siberia	SNP Array	N	Human Origin
Tuba25	Tubalar	Siberia	SNP Array	N	Human Origin
Tuba29	Tubalar	Siberia	SNP Array	N	Human Origin
Tuba30	Tubalar	Siberia	SNP Array	N	Human Origin
Tuba31	Tubalar	Siberia	SNP Array	N	Human Origin
Tuba6	Tubalar	Siberia	SNP Array	N	Human Origin
Tuba9	Tubalar	Siberia	SNP Array	N	Human Origin
Ul1	Ulchi	Siberia	SNP Array	N	Human Origin
Ul10	Ulchi	Siberia	SNP Array	N	Human Origin
Ul16	Ulchi	Siberia	SNP Array	N	Human Origin
Ul19	Ulchi	Siberia	SNP Array	N	Human Origin
Ul24	Ulchi	Siberia	SNP Array	N	Human Origin
Ul25	Ulchi	Siberia	SNP Array	N	Human Origin
Ul31	Ulchi	Siberia	SNP Array	N	Human Origin
Ul33	Ulchi	Siberia	SNP Array	N	Human Origin
Ul36	Ulchi	Siberia	SNP Array	N	Human Origin
Ul39	Ulchi	Siberia	SNP Array	N	Human Origin
Ul43	Ulchi	Siberia	SNP Array	N	Human Origin
Ul44	Ulchi	Siberia	SNP Array	N	Human Origin
Ul5	Ulchi	Siberia	SNP Array	N	Human Origin
Ul51	Ulchi	Siberia	SNP Array	N	Human Origin
Ul52	Ulchi	Siberia	SNP Array	N	Human Origin
Ul55	Ulchi	Siberia	SNP Array	N	Human Origin
Ul56	Ulchi	Siberia	SNP Array	N	Human Origin
Ul59	Ulchi	Siberia	SNP Array	N	Human Origin
Ul6	Ulchi	Siberia	SNP Array	N	Human Origin
Ul65	Ulchi	Siberia	SNP Array	N	Human Origin
Ul69	Ulchi	Siberia	SNP Array	N	Human Origin
Ul70	Ulchi	Siberia	SNP Array	N	Human Origin
Ul71	Ulchi	Siberia	SNP Array	N	Human Origin
Ul74	Ulchi	Siberia	SNP Array	N	Human Origin
HGDP00945	YAK	Siberia	NGS	Y	HGDP
HGDP00946	YAK	Siberia	NGS	Y	HGDP
HGDP00947	YAK	Siberia	NGS	Y	HGDP
HGDP00948	YAK	Siberia	NGS	Y	HGDP
HGDP00949	YAK	Siberia	NGS	Y	HGDP
HGDP00950	YAK	Siberia	NGS	Y	HGDP
HGDP00951	YAK	Siberia	NGS	Y	HGDP
HGDP00952	YAK	Siberia	NGS	Y	HGDP
HGDP00953	YAK	Siberia	NGS	Y	HGDP
HGDP00954	YAK	Siberia	NGS	Y	HGDP
HGDP00955	YAK	Siberia	NGS	Y	HGDP
HGDP00956	YAK	Siberia	NGS	Y	HGDP
HGDP00957	YAK	Siberia	NGS	Y	HGDP
HGDP00958	YAK	Siberia	NGS	Y	HGDP
HGDP00959	YAK	Siberia	NGS	Y	HGDP
HGDP00960	YAK	Siberia	NGS	Y	HGDP
HGDP00961	YAK	Siberia	NGS	Y	HGDP
HGDP00962	YAK	Siberia	NGS	Y	HGDP
HGDP00963	YAK	Siberia	NGS	Y	HGDP
HGDP00964	YAK	Siberia	NGS	Y	HGDP
HGDP00965	YAK	Siberia	NGS	Y	HGDP
HGDP00966	YAK	Siberia	NGS	Y	HGDP
HGDP00967	YAK	Siberia	NGS	Y	HGDP
HGDP00968	YAK	Siberia	NGS	Y	HGDP
HGDP00969	YAK	Siberia	NGS	Y	HGDP
Ckrd13	Yukagir	Siberia	SNP Array	N	Human Origin
Ckrd18	Yukagir	Siberia	SNP Array	N	Human Origin
Ckrd8	Yukagir	Siberia	SNP Array	N	Human Origin
Ckrd9	Yukagir	Siberia	SNP Array	N	Human Origin
Nel13	Yukagir	Siberia	SNP Array	N	Human Origin
Nel15	Yukagir	Siberia	SNP Array	N	Human Origin
Nel16	Yukagir	Siberia	SNP Array	N	Human Origin
Nel17	Yukagir	Siberia	SNP Array	N	Human Origin
Nel19	Yukagir	Siberia	SNP Array	N	Human Origin
Yuk_004	Yukagir	Siberia	SNP Array	N	Human Origin
Yuk_009	Yukagir	Siberia	SNP Array	N	Human Origin
Yuk_011	Yukagir	Siberia	SNP Array	N	Human Origin
Yuk_020	Yukagir	Siberia	SNP Array	N	Human Origin
Yuk_021	Yukagir	Siberia	SNP Array	N	Human Origin
Yuk_022	Yukagir	Siberia	SNP Array	N	Human Origin
Yuk_023	Yukagir	Siberia	SNP Array	N	Human Origin
Yuk_024	Yukagir	Siberia	SNP Array	N	Human Origin
Yuk_025	Yukagir	Siberia	SNP Array	N	Human Origin
HGDP00052	Balochi	South Asia	NGS	Y	HGDP
HGDP00054	Balochi	South Asia	NGS	Y	HGDP
HGDP00056	Balochi	South Asia	NGS	Y	HGDP
HGDP00057	Balochi	South Asia	NGS	Y	HGDP
HGDP00060	Balochi	South Asia	NGS	Y	HGDP
HGDP00062	Balochi	South Asia	NGS	Y	HGDP
HGDP00064	Balochi	South Asia	NGS	Y	HGDP
HGDP00066	Balochi	South Asia	NGS	Y	HGDP
HGDP00068	Balochi	South Asia	NGS	Y	HGDP
HGDP00070	Balochi	South Asia	NGS	Y	HGDP
HGDP00072	Balochi	South Asia	NGS	Y	HGDP
HGDP00074	Balochi	South Asia	NGS	Y	HGDP
HGDP00076	Balochi	South Asia	NGS	Y	HGDP
HGDP00078	Balochi	South Asia	NGS	Y	HGDP
HGDP00080	Balochi	South Asia	NGS	Y	HGDP
HGDP00082	Balochi	South Asia	NGS	Y	HGDP
HGDP00086	Balochi	South Asia	NGS	Y	HGDP
HGDP00088	Balochi	South Asia	NGS	Y	HGDP
HGDP00092	Balochi	South Asia	NGS	Y	HGDP
HGDP00094	Balochi	South Asia	NGS	Y	HGDP
HGDP00096	Balochi	South Asia	NGS	Y	HGDP
HGDP00098	Balochi	South Asia	NGS	Y	HGDP
HGDP00001	Brahui	South Asia	NGS	Y	HGDP
HGDP00003	Brahui	South Asia	NGS	Y	HGDP
HGDP00005	Brahui	South Asia	NGS	Y	HGDP
HGDP00007	Brahui	South Asia	NGS	Y	HGDP
HGDP00009	Brahui	South Asia	NGS	Y	HGDP
HGDP00011	Brahui	South Asia	NGS	Y	HGDP
HGDP00013	Brahui	South Asia	NGS	Y	HGDP
HGDP00015	Brahui	South Asia	NGS	Y	HGDP
HGDP00017	Brahui	South Asia	NGS	Y	HGDP
HGDP00021	Brahui	South Asia	NGS	Y	HGDP
HGDP00023	Brahui	South Asia	NGS	Y	HGDP
HGDP00025	Brahui	South Asia	NGS	Y	HGDP
HGDP00029	Brahui	South Asia	NGS	Y	HGDP
HGDP00031	Brahui	South Asia	NGS	Y	HGDP
HGDP00033	Brahui	South Asia	NGS	Y	HGDP
HGDP00035	Brahui	South Asia	NGS	Y	HGDP
HGDP00037	Brahui	South Asia	NGS	Y	HGDP
HGDP00039	Brahui	South Asia	NGS	Y	HGDP
HGDP00041	Brahui	South Asia	NGS	Y	HGDP
HGDP00043	Brahui	South Asia	NGS	Y	HGDP
HGDP00045	Brahui	South Asia	NGS	Y	HGDP
HGDP00047	Brahui	South Asia	NGS	Y	HGDP
HGDP00049	Brahui	South Asia	NGS	Y	HGDP
HGDP00341	Burusho	South Asia	NGS	Y	HGDP
HGDP00346	Burusho	South Asia	NGS	Y	HGDP
HGDP00351	Burusho	South Asia	NGS	Y	HGDP
HGDP00356	Burusho	South Asia	NGS	Y	HGDP
HGDP00359	Burusho	South Asia	NGS	Y	HGDP
HGDP00364	Burusho	South Asia	NGS	Y	HGDP
HGDP00371	Burusho	South Asia	NGS	Y	HGDP
HGDP00372	Burusho	South Asia	NGS	Y	HGDP
HGDP00376	Burusho	South Asia	NGS	Y	HGDP
HGDP00382	Burusho	South Asia	NGS	Y	HGDP
HGDP00388	Burusho	South Asia	NGS	Y	HGDP
HGDP00392	Burusho	South Asia	NGS	Y	HGDP
HGDP00397	Burusho	South Asia	NGS	Y	HGDP
HGDP00402	Burusho	South Asia	NGS	Y	HGDP
HGDP00407	Burusho	South Asia	NGS	Y	HGDP
HGDP00412	Burusho	South Asia	NGS	Y	HGDP
HGDP00417	Burusho	South Asia	NGS	Y	HGDP
HGDP00423	Burusho	South Asia	NGS	Y	HGDP
HGDP00433	Burusho	South Asia	NGS	Y	HGDP
HGDP00438	Burusho	South Asia	NGS	Y	HGDP
HGDP00444	Burusho	South Asia	NGS	Y	HGDP
HGDP00445	Burusho	South Asia	NGS	Y	HGDP
HGDP00711	Cambodian	South Asia	NGS	Y	HGDP
HGDP00712	Cambodian	South Asia	NGS	Y	HGDP
HGDP00713	Cambodian	South Asia	NGS	Y	HGDP
HGDP00714	Cambodian	South Asia	NGS	Y	HGDP
HGDP00715	Cambodian	South Asia	NGS	Y	HGDP
HGDP00716	Cambodian	South Asia	NGS	Y	HGDP
HGDP00717	Cambodian	South Asia	NGS	Y	HGDP
HGDP00719	Cambodian	South Asia	NGS	Y	HGDP
HGDP00721	Cambodian	South Asia	NGS	Y	HGDP
HGDP00099	Hazara	South Asia	NGS	Y	HGDP
HGDP00100	Hazara	South Asia	NGS	Y	HGDP
HGDP00102	Hazara	South Asia	NGS	Y	HGDP
HGDP00103	Hazara	South Asia	NGS	Y	HGDP
HGDP00104	Hazara	South Asia	NGS	Y	HGDP
HGDP00105	Hazara	South Asia	NGS	Y	HGDP
HGDP00106	Hazara	South Asia	NGS	Y	HGDP
HGDP00109	Hazara	South Asia	NGS	Y	HGDP
HGDP00110	Hazara	South Asia	NGS	Y	HGDP
HGDP00115	Hazara	South Asia	NGS	Y	HGDP
HGDP00118	Hazara	South Asia	NGS	Y	HGDP
HGDP00119	Hazara	South Asia	NGS	Y	HGDP
HGDP00120	Hazara	South Asia	NGS	Y	HGDP
HGDP00121	Hazara	South Asia	NGS	Y	HGDP
HGDP00122	Hazara	South Asia	NGS	Y	HGDP
HGDP00127	Hazara	South Asia	NGS	Y	HGDP
HGDP00129	Hazara	South Asia	NGS	Y	HGDP
HGDP00130	Makrani	South Asia	NGS	Y	HGDP
HGDP00131	Makrani	South Asia	NGS	Y	HGDP
HGDP00133	Makrani	South Asia	NGS	Y	HGDP
HGDP00134	Makrani	South Asia	NGS	Y	HGDP
HGDP00135	Makrani	South Asia	NGS	Y	HGDP
HGDP00136	Makrani	South Asia	NGS	Y	HGDP
HGDP00137	Makrani	South Asia	NGS	Y	HGDP
HGDP00139	Makrani	South Asia	NGS	Y	HGDP
HGDP00140	Makrani	South Asia	NGS	Y	HGDP
HGDP00141	Makrani	South Asia	NGS	Y	HGDP
HGDP00143	Makrani	South Asia	NGS	Y	HGDP
HGDP00144	Makrani	South Asia	NGS	Y	HGDP
HGDP00145	Makrani	South Asia	NGS	Y	HGDP
HGDP00146	Makrani	South Asia	NGS	Y	HGDP
HGDP00148	Makrani	South Asia	NGS	Y	HGDP
HGDP00149	Makrani	South Asia	NGS	Y	HGDP
HGDP00150	Makrani	South Asia	NGS	Y	HGDP
HGDP00151	Makrani	South Asia	NGS	Y	HGDP
HGDP00153	Makrani	South Asia	NGS	Y	HGDP
HGDP00154	Makrani	South Asia	NGS	Y	HGDP
HGDP00155	Makrani	South Asia	NGS	Y	HGDP
HGDP00158	Makrani	South Asia	NGS	Y	HGDP
HGDP00161	Makrani	South Asia	NGS	Y	HGDP
HGDP00213	Pathan	South Asia	NGS	Y	HGDP
HGDP00214	Pathan	South Asia	NGS	Y	HGDP
HGDP00218	Pathan	South Asia	NGS	Y	HGDP
HGDP00222	Pathan	South Asia	NGS	Y	HGDP
HGDP00224	Pathan	South Asia	NGS	Y	HGDP
HGDP00226	Pathan	South Asia	NGS	Y	HGDP
HGDP00228	Pathan	South Asia	NGS	Y	HGDP
HGDP00230	Pathan	South Asia	NGS	Y	HGDP
HGDP00234	Pathan	South Asia	NGS	Y	HGDP
HGDP00237	Pathan	South Asia	NGS	Y	HGDP
HGDP00239	Pathan	South Asia	NGS	Y	HGDP
HGDP00241	Pathan	South Asia	NGS	Y	HGDP
HGDP00243	Pathan	South Asia	NGS	Y	HGDP
HGDP00244	Pathan	South Asia	NGS	Y	HGDP
HGDP00247	Pathan	South Asia	NGS	Y	HGDP
HGDP00248	Pathan	South Asia	NGS	Y	HGDP
HGDP00251	Pathan	South Asia	NGS	Y	HGDP
HGDP00254	Pathan	South Asia	NGS	Y	HGDP
HGDP00258	Pathan	South Asia	NGS	Y	HGDP
HGDP00259	Pathan	South Asia	NGS	Y	HGDP
HGDP00262	Pathan	South Asia	NGS	Y	HGDP
HGDP00264	Pathan	South Asia	NGS	Y	HGDP
HGDP00163	Sindhi	South Asia	NGS	Y	HGDP
HGDP00165	Sindhi	South Asia	NGS	Y	HGDP
HGDP00167	Sindhi	South Asia	NGS	Y	HGDP
HGDP00169	Sindhi	South Asia	NGS	Y	HGDP
HGDP00171	Sindhi	South Asia	NGS	Y	HGDP
HGDP00173	Sindhi	South Asia	NGS	Y	HGDP
HGDP00175	Sindhi	South Asia	NGS	Y	HGDP
HGDP00177	Sindhi	South Asia	NGS	Y	HGDP
HGDP00179	Sindhi	South Asia	NGS	Y	HGDP
HGDP00181	Sindhi	South Asia	NGS	Y	HGDP
HGDP00183	Sindhi	South Asia	NGS	Y	HGDP
HGDP00185	Sindhi	South Asia	NGS	Y	HGDP
HGDP00187	Sindhi	South Asia	NGS	Y	HGDP
HGDP00189	Sindhi	South Asia	NGS	Y	HGDP
HGDP00191	Sindhi	South Asia	NGS	Y	HGDP
HGDP00192	Sindhi	South Asia	NGS	Y	HGDP
HGDP00197	Sindhi	South Asia	NGS	Y	HGDP
HGDP00199	Sindhi	South Asia	NGS	Y	HGDP
HGDP00201	Sindhi	South Asia	NGS	Y	HGDP
HGDP00205	Sindhi	South Asia	NGS	Y	HGDP
HGDP00206	Sindhi	South Asia	NGS	Y	HGDP
HGDP00210	Sindhi	South Asia	NGS	Y	HGDP
HGDP00607	Bedouin	West Eurasia	NGS	Y	HGDP
HGDP00608	Bedouin	West Eurasia	NGS	Y	HGDP
HGDP00609	Bedouin	West Eurasia	NGS	Y	HGDP
HGDP00610	Bedouin	West Eurasia	NGS	Y	HGDP
HGDP00611	Bedouin	West Eurasia	NGS	Y	HGDP
HGDP00612	Bedouin	West Eurasia	NGS	Y	HGDP
HGDP00613	Bedouin	West Eurasia	NGS	Y	HGDP
HGDP00614	Bedouin	West Eurasia	NGS	Y	HGDP
HGDP00615	Bedouin	West Eurasia	NGS	Y	HGDP
HGDP00618	Bedouin	West Eurasia	NGS	Y	HGDP
HGDP00619	Bedouin	West Eurasia	NGS	Y	HGDP
HGDP00620	Bedouin	West Eurasia	NGS	Y	HGDP
HGDP00621	Bedouin	West Eurasia	NGS	Y	HGDP
HGDP00622	Bedouin	West Eurasia	NGS	Y	HGDP
HGDP00623	Bedouin	West Eurasia	NGS	Y	HGDP
HGDP00624	Bedouin	West Eurasia	NGS	Y	HGDP
HGDP00625	Bedouin	West Eurasia	NGS	Y	HGDP
HGDP00626	Bedouin	West Eurasia	NGS	Y	HGDP
HGDP00627	Bedouin	West Eurasia	NGS	Y	HGDP
HGDP00628	Bedouin	West Eurasia	NGS	Y	HGDP
HGDP00629	Bedouin	West Eurasia	NGS	Y	HGDP
HGDP00630	Bedouin	West Eurasia	NGS	Y	HGDP
HGDP00631	Bedouin	West Eurasia	NGS	Y	HGDP
HGDP00632	Bedouin	West Eurasia	NGS	Y	HGDP
HGDP00634	Bedouin	West Eurasia	NGS	Y	HGDP
HGDP00635	Bedouin	West Eurasia	NGS	Y	HGDP
HGDP00636	Bedouin	West Eurasia	NGS	Y	HGDP
HGDP00637	Bedouin	West Eurasia	NGS	Y	HGDP
HGDP00638	Bedouin	West Eurasia	NGS	Y	HGDP
HGDP00639	Bedouin	West Eurasia	NGS	Y	HGDP
HGDP00640	Bedouin	West Eurasia	NGS	Y	HGDP
HGDP00641	Bedouin	West Eurasia	NGS	Y	HGDP
HGDP00642	Bedouin	West Eurasia	NGS	Y	HGDP
HGDP00643	Bedouin	West Eurasia	NGS	Y	HGDP
HGDP00644	Bedouin	West Eurasia	NGS	Y	HGDP
HGDP00645	Bedouin	West Eurasia	NGS	Y	HGDP
HGDP00646	Bedouin	West Eurasia	NGS	Y	HGDP
HGDP00647	Bedouin	West Eurasia	NGS	Y	HGDP
HGDP00648	Bedouin	West Eurasia	NGS	Y	HGDP
HGDP00649	Bedouin	West Eurasia	NGS	Y	HGDP
HGDP00651	Bedouin	West Eurasia	NGS	Y	HGDP
HGDP00653	Bedouin	West Eurasia	NGS	Y	HGDP
HGDP00654	Bedouin	West Eurasia	NGS	Y	HGDP
HGDP00701	Bedouin	West Eurasia	NGS	Y	HGDP
HGDP00557	Druze	West Eurasia	NGS	Y	HGDP
HGDP00558	Druze	West Eurasia	NGS	Y	HGDP
HGDP00559	Druze	West Eurasia	NGS	Y	HGDP
HGDP00560	Druze	West Eurasia	NGS	Y	HGDP
HGDP00561	Druze	West Eurasia	NGS	Y	HGDP
HGDP00562	Druze	West Eurasia	NGS	Y	HGDP
HGDP00563	Druze	West Eurasia	NGS	Y	HGDP
HGDP00564	Druze	West Eurasia	NGS	Y	HGDP
HGDP00565	Druze	West Eurasia	NGS	Y	HGDP
HGDP00566	Druze	West Eurasia	NGS	Y	HGDP
HGDP00567	Druze	West Eurasia	NGS	Y	HGDP
HGDP00568	Druze	West Eurasia	NGS	Y	HGDP
HGDP00571	Druze	West Eurasia	NGS	Y	HGDP
HGDP00572	Druze	West Eurasia	NGS	Y	HGDP
HGDP00573	Druze	West Eurasia	NGS	Y	HGDP
HGDP00574	Druze	West Eurasia	NGS	Y	HGDP
HGDP00575	Druze	West Eurasia	NGS	Y	HGDP
HGDP00576	Druze	West Eurasia	NGS	Y	HGDP
HGDP00577	Druze	West Eurasia	NGS	Y	HGDP
HGDP00578	Druze	West Eurasia	NGS	Y	HGDP
HGDP00579	Druze	West Eurasia	NGS	Y	HGDP
HGDP00580	Druze	West Eurasia	NGS	Y	HGDP
HGDP00581	Druze	West Eurasia	NGS	Y	HGDP
HGDP00582	Druze	West Eurasia	NGS	Y	HGDP
HGDP00583	Druze	West Eurasia	NGS	Y	HGDP
HGDP00584	Druze	West Eurasia	NGS	Y	HGDP
HGDP00586	Druze	West Eurasia	NGS	Y	HGDP
HGDP00587	Druze	West Eurasia	NGS	Y	HGDP
HGDP00588	Druze	West Eurasia	NGS	Y	HGDP
HGDP00590	Druze	West Eurasia	NGS	Y	HGDP
HGDP00591	Druze	West Eurasia	NGS	Y	HGDP
HGDP00595	Druze	West Eurasia	NGS	Y	HGDP
HGDP00598	Druze	West Eurasia	NGS	Y	HGDP
HGDP00599	Druze	West Eurasia	NGS	Y	HGDP
HGDP00600	Druze	West Eurasia	NGS	Y	HGDP
HGDP00601	Druze	West Eurasia	NGS	Y	HGDP
HGDP00602	Druze	West Eurasia	NGS	Y	HGDP
HGDP00604	Druze	West Eurasia	NGS	Y	HGDP
HGDP00606	Druze	West Eurasia	NGS	Y	HGDP
HGDP00511	French	West Eurasia	NGS	Y	HGDP
HGDP00512	French	West Eurasia	NGS	Y	HGDP
HGDP00513	French	West Eurasia	NGS	Y	HGDP
HGDP00514	French	West Eurasia	NGS	Y	HGDP
HGDP00515	French	West Eurasia	NGS	Y	HGDP
HGDP00516	French	West Eurasia	NGS	Y	HGDP
HGDP00517	French	West Eurasia	NGS	Y	HGDP
HGDP00518	French	West Eurasia	NGS	Y	HGDP
HGDP00519	French	West Eurasia	NGS	Y	HGDP
HGDP00520	French	West Eurasia	NGS	Y	HGDP
HGDP00522	French	West Eurasia	NGS	Y	HGDP
HGDP00523	French	West Eurasia	NGS	Y	HGDP
HGDP00524	French	West Eurasia	NGS	Y	HGDP
HGDP00525	French	West Eurasia	NGS	Y	HGDP
HGDP00527	French	West Eurasia	NGS	Y	HGDP
HGDP00528	French	West Eurasia	NGS	Y	HGDP
HGDP00529	French	West Eurasia	NGS	Y	HGDP
HGDP00531	French	West Eurasia	NGS	Y	HGDP
HGDP00534	French	West Eurasia	NGS	Y	HGDP
HGDP00535	French	West Eurasia	NGS	Y	HGDP
HGDP00536	French	West Eurasia	NGS	Y	HGDP
HGDP00537	French	West Eurasia	NGS	Y	HGDP
HGDP00538	French	West Eurasia	NGS	Y	HGDP
HGDP00539	French	West Eurasia	NGS	Y	HGDP
HGDP01357	French	West Eurasia	NGS	Y	HGDP
HGDP01358	French	West Eurasia	NGS	Y	HGDP
HGDP01359	French	West Eurasia	NGS	Y	HGDP
HGDP01360	French	West Eurasia	NGS	Y	HGDP
HGDP01361	French	West Eurasia	NGS	Y	HGDP
HGDP01362	French	West Eurasia	NGS	Y	HGDP
HGDP01363	French	West Eurasia	NGS	Y	HGDP
HGDP01366	French	West Eurasia	NGS	Y	HGDP
HGDP01367	French	West Eurasia	NGS	Y	HGDP
HGDP01368	French	West Eurasia	NGS	Y	HGDP
HGDP01369	French	West Eurasia	NGS	Y	HGDP
HGDP01370	French	West Eurasia	NGS	Y	HGDP
HGDP01371	French	West Eurasia	NGS	Y	HGDP
HGDP01372	French	West Eurasia	NGS	Y	HGDP
HGDP01373	French	West Eurasia	NGS	Y	HGDP
HGDP01374	French	West Eurasia	NGS	Y	HGDP
HGDP01375	French	West Eurasia	NGS	Y	HGDP
HGDP01376	French	West Eurasia	NGS	Y	HGDP
HGDP01377	French	West Eurasia	NGS	Y	HGDP
HGDP01378	French	West Eurasia	NGS	Y	HGDP
HGDP01379	French	West Eurasia	NGS	Y	HGDP
HGDP01380	French	West Eurasia	NGS	Y	HGDP
HGDP01149	Italian	West Eurasia	NGS	Y	HGDP
HGDP01151	Italian	West Eurasia	NGS	Y	HGDP
HGDP01152	Italian	West Eurasia	NGS	Y	HGDP
HGDP01155	Italian	West Eurasia	NGS	Y	HGDP
HGDP01156	Italian	West Eurasia	NGS	Y	HGDP
HGDP01157	Italian	West Eurasia	NGS	Y	HGDP
HGDP01171	Italian	West Eurasia	NGS	Y	HGDP
HGDP01173	Italian	West Eurasia	NGS	Y	HGDP
HGDP01174	Italian	West Eurasia	NGS	Y	HGDP
HGDP01177	Italian	West Eurasia	NGS	Y	HGDP
HGDP00794	Orcadian	West Eurasia	NGS	Y	HGDP
HGDP00795	Orcadian	West Eurasia	NGS	Y	HGDP
HGDP00797	Orcadian	West Eurasia	NGS	Y	HGDP
HGDP00799	Orcadian	West Eurasia	NGS	Y	HGDP
HGDP00800	Orcadian	West Eurasia	NGS	Y	HGDP
HGDP00802	Orcadian	West Eurasia	NGS	Y	HGDP
HGDP00803	Orcadian	West Eurasia	NGS	Y	HGDP
HGDP00804	Orcadian	West Eurasia	NGS	Y	HGDP
HGDP00805	Orcadian	West Eurasia	NGS	Y	HGDP
HGDP00806	Orcadian	West Eurasia	NGS	Y	HGDP
HGDP00807	Orcadian	West Eurasia	NGS	Y	HGDP
HGDP00808	Orcadian	West Eurasia	NGS	Y	HGDP
HGDP00810	Orcadian	West Eurasia	NGS	Y	HGDP
HGDP00675	Palestinian	West Eurasia	NGS	Y	HGDP
HGDP00676	Palestinian	West Eurasia	NGS	Y	HGDP
HGDP00677	Palestinian	West Eurasia	NGS	Y	HGDP
HGDP00678	Palestinian	West Eurasia	NGS	Y	HGDP
HGDP00679	Palestinian	West Eurasia	NGS	Y	HGDP
HGDP00680	Palestinian	West Eurasia	NGS	Y	HGDP
HGDP00682	Palestinian	West Eurasia	NGS	Y	HGDP
HGDP00683	Palestinian	West Eurasia	NGS	Y	HGDP
HGDP00684	Palestinian	West Eurasia	NGS	Y	HGDP
HGDP00685	Palestinian	West Eurasia	NGS	Y	HGDP
HGDP00686	Palestinian	West Eurasia	NGS	Y	HGDP
HGDP00687	Palestinian	West Eurasia	NGS	Y	HGDP
HGDP00689	Palestinian	West Eurasia	NGS	Y	HGDP
HGDP00690	Palestinian	West Eurasia	NGS	Y	HGDP
HGDP00691	Palestinian	West Eurasia	NGS	Y	HGDP
HGDP00692	Palestinian	West Eurasia	NGS	Y	HGDP
HGDP00693	Palestinian	West Eurasia	NGS	Y	HGDP
HGDP00694	Palestinian	West Eurasia	NGS	Y	HGDP
HGDP00696	Palestinian	West Eurasia	NGS	Y	HGDP
HGDP00697	Palestinian	West Eurasia	NGS	Y	HGDP
HGDP00698	Palestinian	West Eurasia	NGS	Y	HGDP
HGDP00699	Palestinian	West Eurasia	NGS	Y	HGDP
HGDP00700	Palestinian	West Eurasia	NGS	Y	HGDP
HGDP00724	Palestinian	West Eurasia	NGS	Y	HGDP
HGDP00726	Palestinian	West Eurasia	NGS	Y	HGDP
HGDP00727	Palestinian	West Eurasia	NGS	Y	HGDP
HGDP00729	Palestinian	West Eurasia	NGS	Y	HGDP
HGDP00730	Palestinian	West Eurasia	NGS	Y	HGDP
HGDP00731	Palestinian	West Eurasia	NGS	Y	HGDP
HGDP00732	Palestinian	West Eurasia	NGS	Y	HGDP
HGDP00733	Palestinian	West Eurasia	NGS	Y	HGDP
HGDP00734	Palestinian	West Eurasia	NGS	Y	HGDP
HGDP00735	Palestinian	West Eurasia	NGS	Y	HGDP
HGDP00736	Palestinian	West Eurasia	NGS	Y	HGDP
HGDP00738	Palestinian	West Eurasia	NGS	Y	HGDP
HGDP00739	Palestinian	West Eurasia	NGS	Y	HGDP
HGDP00740	Palestinian	West Eurasia	NGS	Y	HGDP
HGDP00741	Palestinian	West Eurasia	NGS	Y	HGDP
HGDP00744	Palestinian	West Eurasia	NGS	Y	HGDP
HGDP00745	Palestinian	West Eurasia	NGS	Y	HGDP
HGDP00746	Palestinian	West Eurasia	NGS	Y	HGDP
HGDP00666	Sardinian	West Eurasia	NGS	Y	HGDP
HGDP00667	Sardinian	West Eurasia	NGS	Y	HGDP
HGDP00668	Sardinian	West Eurasia	NGS	Y	HGDP
HGDP00669	Sardinian	West Eurasia	NGS	Y	HGDP
HGDP00670	Sardinian	West Eurasia	NGS	Y	HGDP
HGDP00671	Sardinian	West Eurasia	NGS	Y	HGDP
HGDP00672	Sardinian	West Eurasia	NGS	Y	HGDP
HGDP00673	Sardinian	West Eurasia	NGS	Y	HGDP
HGDP00674	Sardinian	West Eurasia	NGS	Y	HGDP
HGDP01062	Sardinian	West Eurasia	NGS	Y	HGDP
HGDP01063	Sardinian	West Eurasia	NGS	Y	HGDP
HGDP01064	Sardinian	West Eurasia	NGS	Y	HGDP
HGDP01065	Sardinian	West Eurasia	NGS	Y	HGDP
HGDP01066	Sardinian	West Eurasia	NGS	Y	HGDP
HGDP01067	Sardinian	West Eurasia	NGS	Y	HGDP
HGDP01068	Sardinian	West Eurasia	NGS	Y	HGDP
HGDP01069	Sardinian	West Eurasia	NGS	Y	HGDP
HGDP01070	Sardinian	West Eurasia	NGS	Y	HGDP
HGDP01071	Sardinian	West Eurasia	NGS	Y	HGDP
HGDP01072	Sardinian	West Eurasia	NGS	Y	HGDP
HGDP01073	Sardinian	West Eurasia	NGS	Y	HGDP
HGDP01074	Sardinian	West Eurasia	NGS	Y	HGDP
HGDP01075	Sardinian	West Eurasia	NGS	Y	HGDP
HGDP01077	Sardinian	West Eurasia	NGS	Y	HGDP
HGDP01161	Tuscan	West Eurasia	NGS	Y	HGDP
HGDP01162	Tuscan	West Eurasia	NGS	Y	HGDP
HGDP01164	Tuscan	West Eurasia	NGS	Y	HGDP
HGDP01166	Tuscan	West Eurasia	NGS	Y	HGDP
HGDP01167	Tuscan	West Eurasia	NGS	Y	HGDP
HGDP01169	Tuscan	West Eurasia	NGS	Y	HGDP

## Sheet: Table S5
Table S5. Putative adaptive variants within reported CAR genes with significant selection signatures in M.AR.
Gene	SNP rsID	Position (GRCh38)	Ancestral Allele	Derived Allele	DAF								LSBL (X-HAN-French) a				Archaic Informative Variant b	eQTL
					DAU	EVK	ORQ	YAK	HAN	French	Yoruba	YRI (1KG)	DAU	EVK	ORQ	YAK
PRKG1	rs139246015	Chr10:51002502	T	C	0.0625	0.131579	0.130435	0.34	0.00574713	0	0	0	0.110209	0.251252	0.232039	0.518966		N
PRKG1	rs1007183831	Chr10:51006593	G	C	0.0625	0.0526316	0.0217391	0.02	0	0	0	0.00462963	0.185525	0.14056	0.0463476	0.0390491		N
PRKG1	rs78892795	Chr10:51014317	T	C	0.03125	0.0263158	0.0434783	0.16	0.0258621	0	0	0	0.0146473	0.00826977	0.0195084	0.186617		N
PRKG1	rs200232338	Chr10:51015433	A	C	0.09375	0	0	0	0	0	0	0	0.262346	NA	NA	NA		N
PRKG1	rs74441928	Chr10:51038635	A	C	0.15625	0.131579	0.217391	0.32	0.149425	0	0	0	0.0785345	0.0459101	0.0989964	0.191991		N
PRKG1	rs74447961	Chr10:51042638	G	A	0	0.131579	0.0217391	0.16	0.0201149	0	0	0	-0.00305989	0.176733	0.00513946	0.206311		N
PRKG1	rs551660574	Chr10:51046296	A	G	0.0625	0	0	0.04	0	0	0	0	0.185525	NA	NA	0.0875008		N
PRKG1	rs964485247	Chr10:51070508	A	T	0.09375	0	0	0	0	0	0	0	0.262346	NA	NA	NA		N
PRKG1	rs145623695	Chr10:51078857	C	T	0.03125	0.131579	0.0217391	0.18	0.0373563	0	0	0	0.0108533	0.128146	-0.0005395	0.1861		N
PRKG1	rs80118774	Chr10:51080336	G	A	0.0625	0.105263	0.108696	0.04	0.00574713	0	0	0	0.110209	0.200433	0.189837	0.0437702		N
PRKG1	rs78995096	Chr10:51081770	T	C	0.0625	0	0.130435	0.14	0.0201149	0	0	0	0.0562271	-0.00305989	0.161538	0.172468		N
PRKG1	rs534060500	Chr10:51083215	G	T	0.0625	0	0	0	0	0	0	0	0.185525	NA	NA	NA		N
PRKG1	rs117374112	Chr10:51088678	C	T	0.0625	0.131579	0.130435	0.04	0.00574713	0	0	0	0.110209	0.255913	0.232039	0.0437702		N
PRKG1	rs189203183	Chr10:51092529	C	T	0	0	0.0869565	0.14	0	0	0	0	NA	NA	0.197459	0.282853		N
PRKG1	rs1013746781	Chr10:51108820	T	C	0.09375	0	0	0	0	0	0	0	0.262346	NA	NA	NA		N
PRKG1	rs78246279	Chr10:51118078	G	A	0.03125	0.131579	0.130435	0.04	0	0	0	0	0.0936797	0.31155	0.279201	0.0875008		N
PRKG1	rs923613692	Chr10:51118551	T	C	0.0625	0.0526316	0.0434783	0.02	0	0	0	0	0.185525	0.14056	0.101408	0.0390491		N
PRKG1	rs1589174217	Chr10:51127105	G	T	0	0.0263158	0	0.1	0	0	0	0	NA	0.0676997	NA	0.21246		N
PRKG1	rs144443977	Chr10:51130463	C	T	0.9375	1	1	1	1	1	1	0.99537	0.185525	NA	NA	NA		N
PRKG1	rs79750751	Chr10:51178653	T	C	0.0625	0.184211	0.108696	0.04	0.0287356	0	0	0	0.0435395	0.237134	0.100965	0.0148814		N
PRKG1	rs116993022	Chr10:51178948	G	A	0.09375	0.184211	0.195652	0.36	0.100575	0	0	0	0.0458539	0.115064	0.113745	0.302162		N
PRKG1	rs1476332216	Chr10:51185076	C	A	0.0625	0	0	0	0	0	0	0	0.185525	NA	NA	NA		N
PRKG1	rs192022625	Chr10:51201996	C	T	0.09375	0.0263158	0.0652174	0.1	0.00287356	0	0	0	0.219611	0.0320221	0.119741	0.186022		N
PRKG1	rs536549776	Chr10:51208599	G	A	0.0625	0.0263158	0.0217391	0	0	0	0	0	0.185525	0.0676997	0.0463476	NA		N
PRKG1	rs536132914	Chr10:51215464	G	A	0.0625	0	0	0	0	0	0	0	0.185525	NA	NA	NA		N
PRKG1	rs142759685	Chr10:51220575	C	T	0.0625	0	0	0	0	0	0	0	0.185525	NA	NA	NA		N
PRKG1	rs188794060	Chr10:51223378	G	T	0.09375	0.0263158	0.0652174	0.04	0	0	0	0	0.262346	0.0676997	0.151516	0.0875008		N
PRKG1	rs112623146	Chr10:51230055	G	A	0.09375	0.0263158	0.0652174	0.02	0.00862069	0	0.138889	0.0231481	0.16729	0.0135899	0.0844777	0.0065304		N
PRKG1	rs188760765	Chr10:51236556	G	A	0.03125	0	0.0869565	0.14	0	0	0	0	0.0936797	NA	0.197459	0.282853		N
PRKG1	rs60296758	Chr10:51240684	T	C	0	0.157895	0.0869565	0.04	0.0258621	0	0	0	-0.00494488	0.200402	0.0734931	0.0158269		N
PRKG1	rs1589277873	Chr10:51248812	A	C	0.0625	0	0	0	0	0	0	0	0.185525	NA	NA	NA		N
PRKG1	rs184621208	Chr10:51250739	T	C	0.15625	0.0263158	0.0434783	0	0.0201149	0	0	0	0.238385	0.0101548	0.0214672	-0.00284958		N
PRKG1	rs150303246	Chr10:51258074	G	A	0	0.157895	0.0869565	0.04	0.0316092	0	0	0	-0.00627104	0.182275	0.0637613	0.013934		N
PRKG1	rs74899499	Chr10:51260390	T	C	0.1875	0.210526	0.152174	0.42	0.112069	0	0	0	0.12032	0.13333	0.0670929	0.357979		N
PRKG1	rs60768858	Chr10:51273172	C	A	0.09375	0.210526	0.26087	0.56	0.172414	0.141304	0.0833333	0.138889	0.00235243	0	0.0210497	0.327674		N
PRKG1	rs59171878	Chr10:51273239	C	T	0.09375	0.210526	0.26087	0.56	0.172414	0.141304	0.0833333	0.138889	0.00235243	0	0.0210497	0.327674		N
PRKG1	rs61115951	Chr10:51273313	C	T	0.90625	0.789474	0.73913	0.44	0.827586	0.858696	0.916667	0.861111	0.00235243	0	0.0210497	0.327674		N
PRKG1	rs79302330	Chr10:51273413	T	C	0.90625	0.789474	0.73913	0.44	0.827586	0.847826	0.666667	0.537037	0.00235243	0	0.0165542	0.318396		N
PRKG1	rs73337573	Chr10:51273479	G	A	0.09375	0.210526	0.26087	0.56	0.172414	0.141304	0.0833333	0.138889	0.00235243	0	0.0210497	0.327674		N
PRKG1	rs61852063	Chr10:51273647	A	G	0.09375	0.210526	0.26087	0.56	0.172414	0.141304	0.0833333	0.143519	0.00235243	0	0.0210497	0.327674		N
PRKG1	rs150840903	Chr10:51273745	G	C	0.0625	0	0	0	0	0	0	0	0.185525	NA	NA	NA		N
PRKG1	rs73337578	Chr10:51274360	T	A	0.90625	0.789474	0.73913	0.44	0.827586	0.847826	0.666667	0.569444	0.00235243	0	0.0165542	0.318396		N
PRKG1	rs60806033	Chr10:51274626	A	G	0.90625	0.789474	0.73913	0.44	0.827586	0.847826	0.666667	0.537037	0.00235243	0	0.0165542	0.318396		N
PRKG1	rs4086290	Chr10:51275179	A	G	0.09375	0.210526	0.26087	0.56	0.175287	0.141304	0.0833333	0.134259	0.00308643	0	0.0201377	0.324883		N
PRKG1	rs3844131	Chr10:51275336	C	T	0.09375	0.210526	0.26087	0.56	0.175287	0.141304	0.0833333	0.143519	0.00308643	0	0.0201377	0.324883		N
PRKG1	rs11594220	Chr10:51275862	G	A	0.09375	0.210526	0.26087	0.56	0.175287	0.141304	0.0833333	0	0.00308643	0	0.0201377	0.324883		N
PRKG1	rs4554831	Chr10:51280223	T	C	0.09375	0.210526	0.26087	0.56	0.175287	0.141304	0.0833333	0.148148	0.00308643	0	0.0201377	0.324883		N
PRKG1	rs113670906	Chr10:51281403	C	T	0.09375	0.210526	0.26087	0.56	0.172414	0.141304	0.0833333	0.148148	0.00267714	0	0.0212564	0.327777		N
PRKG1	rs1915678	Chr10:51285504	A	G	0.90625	0.789474	0.73913	0.44	0.83046	0.847826	0.611111	0.398148	0.00162977	0	0.0175123	0.321223		Y
PRKG1	rs79147738	Chr10:51286710	C	T	0.09375	0.210526	0.26087	0.56	0.166667	0.141304	0.0555556	0.115741	0.00091883	0	0.0230133	0.333363		N
PRKG1	rs79099799	Chr10:51287023	A	G	0.09375	0.210526	0.26087	0.56	0.16954	0.141304	0.0833333	0.12037	0.00162977	0	0.0220077	0.3305		N
PRKG1	rs12264442	Chr10:51287543	G	A	0.09375	0.210526	0.26087	0.56	0.172414	0.141304	0.111111	0.273148	0.00235243	0	0.0210497	0.327674		N
PRKG1	rs10082492	Chr10:51288128	A	T	0.09375	0.210526	0.26087	0.56	0.16954	0.152174	0.388889	0.601852	0.00162977	0	0.0175123	0.321223		N
PRKG1	rs10082503	Chr10:51288444	T	A	0.09375	0.210526	0.26087	0.56	0.16954	0.152174	0.388889	0.601852	0.00162977	0	0.0175123	0.321223		Y
PRKG1	rs35078410	Chr10:51288468	T	C	0.90625	0.789474	0.73913	0.44	0.833333	0.847826	0.611111	0.398148	0.00125353	0	0.018728	0.324188		Y
PRKG1	rs2879558	Chr10:51288730	T	A	0.09375	0.210526	0.26087	0.56	0.16954	0.152174	0.388889	0.601852	0.00162977	0	0.0175123	0.321223		Y
PRKG1	rs2339709	Chr10:51288731	T	G	0.90625	0.789474	0.73913	0.44	0.83046	0.847826	0.611111	0.398148	0.00162977	0	0.0175123	0.321223		Y
PRKG1	rs2339710	Chr10:51288791	T	G	0.90625	0.789474	0.73913	0.44	0.83046	0.847826	0.611111	0	0.00162977	0	0.0175123	0.321223		Y
PRKG1	rs2339712	Chr10:51289098	A	C	0.90625	0.789474	0.73913	0.44	0.83046	0.847826	0.611111	0.416667	0.00162977	0	0.0175123	0.321223		Y
PRKG1	rs10490971	Chr10:51297832	C	T	0.09375	0.210526	0.26087	0.58	0.163793	0.152174	0.0833333	0.194444	0.000559955	0	0.0205631	0.350527		N
PRKG1	rs12251902	Chr10:51298625	C	T	0.09375	0.263158	0.26087	0.56	0.166667	0.130435	0.0555556	0.166667	0.00125353	0.0289587	0.0291938	0.343476		N
PRKG1	rs200764448	Chr10:51300103	G	T	0.09375	0	0.0434783	0	0.00287356	0	0	0	0.219611	0	0.0695224	0		N
PRKG1	rs1915680	Chr10:51300231	C	G	0.875	0.815789	0.717391	0.42	0.818966	0.706522	0.472222	0.310185	0.010773	-0.00924855	-0.00529705	0.219838		N
PRKG1	rs10490969	Chr10:51302292	T	C	0.125	0.210526	0.26087	0.5	0.163793	0.0869565	0.138889	0.180556	-0.0080524	0.0172938	0.0523547	0.310182		N
PRKG1	rs139553996	Chr10:51303897	C	T	0.09375	0.184211	0.217391	0.5	0.132184	0.0108696	0.0555556	0.0740741	0.0093182	0.071569	0.0941093	0.409176		N
PRKG1	rs7100331	Chr10:51305237	A	G	0.09375	0.184211	0.217391	0.5	0.132184	0.0108696	0	0.0972222	0.0093182	0.071569	0.0941093	0.409176		N
PRKG1	rs16916757	Chr10:51317653	G	C	0.09375	0.236842	0.217391	0.42	0.189655	0	0	0	0.0204116	0.108064	0.0801945	0.253816		N
PRKG1	rs567832541	Chr10:51320384	A	C	0	0.0263158	0.0217391	0.2	0	0	0	0	NA	0.0676997	0.0463476	0.374503		N
PRKG1	rs192053247	Chr10:51324874	G	T	0.03125	0	0.0869565	0.12	0	0	0	0	0.0936797	NA	0.197459	0.248735		N
PRKG1	rs117702452	Chr10:51328492	C	T	0	0.131579	0.0869565	0.04	0.0287356	0	0	0	-0.00589035	0.14437	0.068321	0.0148814		N
PRKG1	rs183889357	Chr10:51339512	A	T	0.03125	0.0789474	0.0217391	0.12	0.00862069	0	0	0	0.0233846	0.122237	0.00819935	0.187016		N
PRKG1	rs148148909	Chr10:51344890	T	C	0.0625	0	0	0	0	0	0	0	0.185525	NA	NA	NA		N
PRKG1	rs201660366	Chr10:51364402	G	A	0.0625	0	0	0	0	0	0	0	0.185525	NA	NA	NA		N
PRKG1	rs75990809	Chr10:51373721	A	G	0.15625	0.0263158	0.0869565	0.02	0.0201149	0.0108696	0	0	0.209026	0	0.0659186	0		N
PRKG1	rs1048652570	Chr10:51376635	C	T	0.0625	0.0263158	0.0217391	0.02	0	0	0	0	0.185525	0.0676997	0.0463476	0.0390491		N
PRKG1	rs75603818	Chr10:51385160	G	A	0.03125	0.157895	0.130435	0.06	0.00574713	0	0	0	0.0316273	0.303179	0.232039	0.0772193		N
PRKG1	rs1196732789	Chr10:51385383	G	A	0.0625	0.0263158	0.0217391	0	0	0	0	0	0.185525	0.0676997	0.0463476	NA		N
PRKG1	rs680439	Chr10:51387918	G	A	0.625	0.578947	0.543478	0.72	0.474138	0.152174	0.194444	0.125	0.12576	0.0865282	0.0587855	0.211236		N
PRKG1	rs625618	Chr10:51388831	C	G	0.5625	0.552632	0.521739	0.74	0.465517	0.152174	0.194444	0.125	0.0792235	0.0720575	0.0499875	0.23889		N
PRKG1	rs626431	Chr10:51388993	C	A	0.625	0.578947	0.565217	0.74	0.479885	0.141304	0.194444	0.125	0.125875	0.0867956	0.0730467	0.228948		N
PRKG1	rs12246479	Chr10:51389109	G	T	0.1875	0.236842	0.217391	0.1	0.387931	0.48913	0.222222	0.199074	0.101181	0.0626913	0.0814071	0.203147		N
PRKG1	rs12269264	Chr10:51389280	A	G	0.1875	0.236842	0.217391	0.1	0.393678	0.48913	0.222222	0.203704	0.104337	0.0655012	0.084377	0.206697		N
PRKG1	rs7086716	Chr10:51390492	C	A	0.5625	0.552632	0.521739	0.74	0.471264	0.163043	0.25	0.171296	0.071156	0.0647495	0.043637	0.230388		N
PRKG1	rs10997320	Chr10:51390520	T	C	0.1875	0.236842	0.217391	0.1	0.393678	0.478261	0.166667	0.115741	0.100983	0.0626511	0.0813157	0.202881		N
PRKG1	rs192770199	Chr10:51390777	G	A	0.0625	0	0.0217391	0	0	0	0	0	0.185525	NA	0.0463476	NA		N
PRKG1	rs946796088	Chr10:51391474	G	A	0.0625	0.0263158	0	0.02	0	0	0	0	0.185525	0.0676997	NA	0.0390491		N
PRKG1	rs293227	Chr10:51396600	A	G	0.625	0.578947	0.565217	0.74	0.479885	0.152174	0.194444	0.12037	0.121317	0.0825802	0.069308	0.225929		N
PRKG1	rs293228	Chr10:51396699	A	G	0.625	0.578947	0.565217	0.74	0.488506	0.141304	0.194444	0.12037	0.119233	0.0809047	0.068136	0.221127		N
PRKG1	rs293230	Chr10:51398309	C	T	0.625	0.578947	0.565217	0.74	0.485632	0.141304	0.194444	0.12037	0.121439	0.0828587	0.069485	0.22373		N
PRKG1	rs293232	Chr10:51398642	C	T	0.625	0.578947	0.565217	0.74	0.485632	0.141304	0.194444	0.12037	0.121439	0.0828587	0.069485	0.22373		N
PRKG1	rs293233	Chr10:51399316	T	C	0.21875	0.236842	0.23913	0.14	0.364943	0.597826	0.638889	0	0.080024	0.0678171	0.0683799	0.166124		Y
PRKG1	rs12773412	Chr10:51399635	T	G	0.1875	0.210526	0.217391	0.1	0.356322	0.48913	0.222222	0.208333	0.0831158	0.0669121	0.0644859	0.182682		N
PRKG1	rs10997388	Chr10:51399806	G	A	0.1875	0.210526	0.217391	0.1	0.356322	0.5	0.222222	0.217593	0.0855647	0.069156	0.0666568	0.185539		N
PRKG1	rs293236	Chr10:51400509	G	T	0.625	0.578947	0.565217	0.74	0.479885	0.152174	0.194444	0.12037	0.121317	0.0825802	0.069308	0.225929		N
PRKG1	rs58639483	Chr10:51401075	T	C	0.90625	0.842105	0.869565	0.9	0.991379	1	1	1	0.16729	0.283192	0.214116	0.144918		N
PRKG1	rs1555878	Chr10:51402690	G	C	0.71875	0.631579	0.73913	0.82	0.508621	0.184783	0.166667	0.166667	0.169865	0.0935533	0.189906	0.273873		N
PRKG1	rs10822922	Chr10:51404003	G	T	0.21875	0.263158	0.23913	0.14	0.399425	0.586957	0.555556	0.5	0.102089	0.0672293	0.0897032	0.191047		N
PRKG1	rs10762113	Chr10:51404596	T	G	0.625	0.578947	0.565217	0.74	0.488506	0.173913	0.222222	0.180556	0.106114	0.0688567	0.0574565	0.212145		N
PRKG1	rs7096851	Chr10:51408956	T	C	0.71875	0.631579	0.695652	0.82	0.517241	0.217391	0.305556	0.226852	0.152368	0.0777499	0.132692	0.258809		N
PRKG1	rs4935249	Chr10:51411333	C	T	0.71875	0.631579	0.695652	0.82	0.508621	0.228261	0.305556	0.226852	0.156345	0.0808738	0.136743	0.264307		N
PRKG1	rs7902687	Chr10:51413278	A	G	0.28125	0.368421	0.304348	0.18	0.485632	0.771739	0.722222	0.796296	0.151565	0.0768596	0.132189	0.259084		N
PRKG1	rs293240	Chr10:51414803	T	C	0.625	0.578947	0.565217	0.74	0.488506	0.152174	0.111111	0.0787037	0.114837	0.0768272	0.0645095	0.218193		N
PRKG1	rs293241	Chr10:51415005	T	C	0.71875	0.631579	0.695652	0.82	0.520115	0.228261	0.138889	0.106481	0.146543	0.0726009	0.127437	0.253675		N
PRKG1	rs293243	Chr10:51415503	G	T	0.625	0.578947	0.543478	0.74	0.477011	0.141304	0.0555556	0.037037	0.127984	0.0886803	0.0606265	0.231518		N
PRKG1	rs595119	Chr10:51416040	T	C	0.625	0.578947	0.565217	0.74	0.482759	0.152174	0.111111	0.0787037	0.11923	0.0807185	0.0675104	0.223377		N
PRKG1	rs2053631	Chr10:51417168	A	G	0.375	0.394737	0.434783	0.26	0.491379	0.847826	0.75	0.782407	0.100609	0.0836644	0.054605	0.200528		N
PRKG1	rs140192764	Chr10:51420929	C	T	0.15625	0.0526316	0.0217391	0	0.00862069	0	0	0	0.304912	0.0644597	0.00819935	0		N
PRKG1	rs293323	Chr10:51423333	G	A	0.28125	0.368421	0.304348	0.18	0.479885	0.76087	0.666667	0.587963	0.143554	0.0699474	0.124794	0.251365		N
PRKG1	rs293325	Chr10:51424367	T	C	0.625	0.578947	0.565217	0.74	0.482759	0.152174	0.0555556	0.0509259	0.11923	0.0807185	0.0675104	0.223377		N
PRKG1	rs190928780	Chr10:51424453	G	A	0.0625	0	0	0	0	0	0	0.00462963	0.185525	NA	NA	NA		N
PRKG1	rs293326	Chr10:51424788	T	C	0.625	0.578947	0.565217	0.74	0.479885	0.152174	0.0555556	0.0509259	0.121438	0.0826781	0.0693802	0.225974		N
PRKG1	rs293327	Chr10:51424852	G	A	0.625	0.578947	0.565217	0.74	0.479885	0.152174	0.0555556	0.0509259	0.121438	0.0826781	0.0693802	0.225974		N
PRKG1	rs293328	Chr10:51425318	G	A	0.625	0.578947	0.565217	0.74	0.482759	0.152174	0.166667	0.185185	0.11923	0.0807185	0.0675104	0.223377		N
PRKG1	rs201934977	Chr10:51426229	C	T	0.0625	0	0	0	0	0	0	0	0.185525	NA	NA	NA		N
PRKG1	rs293330	Chr10:51426719	T	C	0.65625	0.605263	0.586957	0.78	0.497126	0.304348	0.361111	0.402778	0.0875844	0.0490579	0.0376572	0.211384		N
PRKG1	rs293331	Chr10:51428021	A	G	0.65625	0.605263	0.586957	0.78	0.497126	0.304348	0.277778	0.305556	0.0875844	0.0490579	0.0376572	0.211384		N
PRKG1	rs293332	Chr10:51429077	A	G	0.65625	0.605263	0.586957	0.78	0.5	0.293478	0.361111	0.402778	0.0883831	0.0495736	0.0379918	0.212061		N
PRKG1	rs4935251	Chr10:51431886	G	A	0.25	0.315789	0.282609	0.14	0.436782	0.619565	0.194444	0.189815	0.105031	0.0532251	0.0821656	0.226693		N
PRKG1	rs185441258	Chr10:51432030	A	G	0	0.0263158	0.0217391	0.2	0	0	0	0	NA	0.0676997	0.0463476	0.374503		N
PRKG1	rs12248673	Chr10:51433073	C	T	0.25	0.315789	0.282609	0.14	0.439655	0.608696	0.194444	0.231481	0.104496	0.052965	0.0817572	0.226158		N
PRKG1	rs293334	Chr10:51433490	T	C	0.59375	0.578947	0.565217	0.74	0.491379	0.152174	0.0555556	0.0787037	0.0875876	0.0748954	0.0631665	0.215607		N
PRKG1	rs1033969	Chr10:51433534	T	C	0.28125	0.315789	0.282609	0.14	0.448276	0.641304	0.333333	0.402778	0.0905547	0.0644017	0.0943526	0.24125		N
PRKG1	rs1018636	Chr10:51433562	A	C	0.6875	0.657895	0.695652	0.82	0.548851	0.228261	0.305556	0.25463	0.0962755	0.0734662	0.105271	0.227659		N
PRKG1	rs293336	Chr10:51435631	G	A	0.59375	0.552632	0.586957	0.74	0.456897	0.152174	0.0555556	0.0648148	0.11203	0.0776183	0.102436	0.246724		N
PRKG1	rs144563151	Chr10:51436194	A	G	0	0.0263158	0.0869565	0	0	0	0	0	NA	0.0676997	0.191445	NA		N
PRKG1	rs182082355	Chr10:51444727	T	C	0.09375	0.0263158	0.108696	0.08	0	0	0	0	0.262346	0.0676997	0.239854	0.17374		N
PRKG1	rs12765290	Chr10:51457529	C	T	0.625	0.578947	0.586957	0.74	0.525862	0.163043	0.138889	0.180556	0.0843605	0.0539835	0.0556075	0.182674		N
PRKG1	rs1348542	Chr10:51458698	T	G	0.625	0.578947	0.586957	0.74	0.525862	0.152174	0.138889	0.180556	0.088388	0.0576705	0.05891	0.185413		N
PRKG1	rs10508940	Chr10:51459166	C	T	0.625	0.578947	0.586957	0.74	0.525862	0.152174	0.138889	0.180556	0.088388	0.0576705	0.05891	0.185413		N
PRKG1	rs10997638	Chr10:51463591	G	A	0.6875	0.552632	0.608696	0.8	0.456897	0.141304	0.0833333	0.175926	0.200198	0.0827442	0.125217	0.311774		N
PRKG1	rs534313004	Chr10:51481212	C	T	0.09375	0.0263158	0.0217391	0	0	0	0	0	0.262346	0.0676997	0.0463476	NA	ORQ	N
PRKG1	rs191874407	Chr10:51489894	T	G	0.03125	0.0263158	0	0.16	0.00574713	0	0	0	0.0316273	0.0196014	0	0.275017		N
PRKG1	rs192845681	Chr10:51493288	T	C	0	0.0263158	0.0217391	0.2	0	0	0	0	NA	0.0676997	0.0463476	0.374503	ORQ	N
PRKG1	rs16918657	Chr10:51494411	T	G	0.75	0.552632	0.717391	0.72	0.54023	0.108696	0	0	0.198734	0.053252	0.165663	0.166269	ORQ	N
PRKG1	rs141569756	Chr10:51498929	C	T	0.03125	0.0789474	0.0217391	0.22	0.0114943	0	0	0	0.0193449	0.108168	0.00795209	0.339115	ORQ	N
PRKG1	rs117189909	Chr10:51502911	C	T	0	0.105263	0	0.04	0.00287356	0	0	0	0	0.226457	0	0.0588347		N
PRKG1	rs143530929	Chr10:51504409	C	G	0.1875	0.131579	0.0869565	0.2	0.0373563	0	0	0	0.233716	0.128146	0.0560859	0.214634	ORQ	N
PRKG1	rs79522760	Chr10:51509973	C	T	0	0.131579	0	0.06	0.0172414	0	0	0	-0.00212037	0.188588	-0.00212037	0.0474156		N
PRKG1	rs988808125	Chr10:51524430	A	G	0.03125	0.0789474	0.0217391	0.02	0.00287356	0	0	0	0.0481446	0.166373	0.0194882	0.0153775	ORQ	N
PRKG1	rs577617323	Chr10:51528064	A	G	0	0.0263158	0.0217391	0.2	0	0	0	0	NA	0.0676997	0.0463476	0.374503	ORQ	N
PRKG1	rs372643740	Chr10:51537470	C	T	0	0.0789474	0	0.04	0	0	0	0	NA	0.204285	NA	0.0875008		N
PRKG1	rs1214397957	Chr10:51554326	A	G	0	0.0263158	0.0217391	0.2	0	0	0	0	NA	0.0676997	0.0463476	0.374503	ORQ	N
PRKG1	rs199854048	Chr10:51562021	G	A	0.0625	0	0	0	0	0	0	0	0.185525	NA	NA	NA		N
PRKG1	rs181974504	Chr10:51563616	G	A	0.03125	0.0263158	0	0.14	0.0114943	0	0.0277778	0.0324074	0.0193449	0.0129674	-0.000247258	0.208858		N
PRKG1	rs1033691134	Chr10:51564652	A	G	0.0625	0	0	0	0	0	0	0	0.185525	NA	NA	NA		N
PRKG1	rs189933715	Chr10:51567268	T	G	0.125	0.0789474	0.173913	0.06	0.00287356	0	0	0	0.291248	0.166373	0.328469	0.103136	ORQ	N
PRKG1	rs566831111	Chr10:51581506	C	G	0	0.0789474	0	0.04	0	0	0	0	NA	0.204285	NA	0.0875008		N
PRKG1	rs145234990	Chr10:51597434	T	C	0	0.0789474	0	0.04	0	0	0	0	NA	0.204285	NA	0.0875008		N
PRKG1	rs201047252	Chr10:51597995	T	C	0.0625	0	0	0	0	0	0	0	0.185525	NA	NA	NA		N
PRKG1	rs927643141	Chr10:51608788	A	G	0.0625	0.0263158	0	0.02	0	0	0	0	0.185525	0.0676997	NA	0.0390491		N
PRKG1	rs188830460	Chr10:51620576	C	T	0.0625	0.0526316	0.152174	0.06	0.00287356	0	0	0	0.137766	0.100544	0.292165	0.103136		N
PRKG1	rs74475722	Chr10:51646142	A	T	0.21875	0.131579	0.108696	0.26	0.0804598	0	0	0	0.190848	0.0751144	0.0479291	0.211494		N
PRKG1	rs187036893	Chr10:51662033	C	T	0.0625	0.0526316	0.173913	0.08	0.0201149	0	0	0	0.0562271	0.0365862	0.237067	0.0721862		N
PRKG1	rs201680096	Chr10:51671841	C	T	0.0625	0	0	0	0	0	0	0	0.185525	NA	NA	NA		N
PRKG1	rs1589189421	Chr10:51678378	A	G	0.0625	0.0263158	0.0217391	0	0	0	0	0	0.185525	0.0676997	0.0463476	NA		N
PRKG1	rs567713388	Chr10:51684080	G	A	0.0625	0	0	0.02	0	0	0	0	0.185525	NA	NA	0.0390491		N
PRKG1	rs188474786	Chr10:51708674	T	C	0.0625	0.0263158	0.152174	0.04	0.00287356	0	0	0	0.137766	0.0320221	0.289127	0.0588347		N
PRKG1	rs139537719	Chr10:51710814	C	G	0.0625	0	0	0	0	0	0	0	0.185525	NA	NA	NA		N
PRKG1	rs1385615420	Chr10:51716670	G	C	0	0	0.0652174	0	0	0	0	0	NA	NA	0.151516	NA		N
PRKG1	rs142541488	Chr10:51719634	C	T	0.15625	0.131579	0.173913	0.04	0.0201149	0	0	0	0.238385	0.176733	0.234595	0.0177119		N
PRKG1	rs562461967	Chr10:51739217	G	A	0	0	0	0.08	0	0	0	0	NA	NA	NA	0.17374		N
PRKG1	rs149924704	Chr10:51749888	C	T	0.09375	0.105263	0.0217391	0.18	0.0172414	0	0	0	0.123904	0.131796	0.00607898	0.251135		N
PRKG1	rs527642179	Chr10:51750017	C	A	0	0	0	0.08	0	0	0	0	NA	NA	NA	0.17374		N
PRKG1	rs192212566	Chr10:51750032	T	A	0.0625	0.0526316	0.0217391	0.18	0.00287356	0	0	0	0.137766	0.100544	0.0194882	0.325665		N
PRKG1	rs78481828	Chr10:51775947	C	T	0.125	0.342105	0.130435	0.3	0.0862069	0	0	0	0.0764404	0.332875	0.0611293	0.253443		N
PRKG1	rs142748577	Chr10:51786116	T	A	0	0.105263	0	0.04	0	0	0	0	NA	0.260813	NA	0.0875008		N
PRKG1	rs118047558	Chr10:51787263	C	T	0.09375	0.0263158	0.0434783	0	0.00287356	0	0	0	0.210489	0.0320221	0.0695224	0		N
PRKG1	rs150409559	Chr10:51791471	C	T	0.0625	0.0526316	0.0217391	0.18	0.00287356	0	0	0	0.137766	0.100544	0.0194882	0.325665		N
PRKG1	rs11813335	Chr10:51802708	A	G	0.5	0.210526	0.608696	0.34	0.376437	0.228261	0.194444	0.384259	0.0582355	0.00110765	0.155527	-0.0119217		Y
PRKG1	rs10823626	Chr10:51803033	A	G	0.5	0.210526	0.608696	0.34	0.376437	0.228261	0.166667	0.365741	0.0582355	0.00110765	0.155527	-0.0119217		Y
PRKG1	rs1937652	Chr10:51805558	A	G	0.5	0.210526	0.652174	0.36	0.376437	0.228261	0.166667	0.365741	0.0582355	0.00110765	0.199245	-0.0060165		Y
PRKG1	rs10762409	Chr10:51806773	A	G	0.53125	0.789474	0.391304	0.64	0.623563	0.771739	0.777778	0.583333	0.0359968	0.00110765	0.155527	-0.0060165		Y
PRKG1	rs2154278	Chr10:51807564	G	A	0.5	0.789474	0.391304	0.66	0.626437	0.771739	0.777778	0.587963	0.0599046	0.00110575	0.157669	-0.0111485		N
PRKG1	rs78195031	Chr10:51810818	G	A	0.09375	0.0789474	0.152174	0.02	0.0172414	0	0	0	0.123904	0.0871735	0.208334	0.00441002		N
PRKG1	rs116922707	Chr10:51824369	G	A	0	0.131579	0	0.04	0	0	0	0	NA	0.31155	NA	0.0875008		N
PRKG1	rs7100647	Chr10:51846528	A	G	0.625	0.657895	0.608696	0.76	0.491379	0.391304	0.111111	0.25	0.0446292	0.0715056	0.0386313	0.166524		N
PRKG1	rs34707821	Chr10:51864058	C	T	0.09375	0.0263158	0.195652	0.08	0.0344828	0.0326087	0.0555556	0.0740741	0.0198433	0	0.172091	0.0124125		N
PRKG1	rs72799476	Chr10:51866337	A	G	0.09375	0.0263158	0.195652	0.08	0.0316092	0.0326087	0.0555556	0.0740741	0.0235887	0	0.179624	0.0150449		N
PRKG1	rs7071831	Chr10:51868073	T	C	0.09375	0.0263158	0.195652	0.08	0.0344828	0.0326087	0.527778	0.564815	0.0198433	0	0.172091	0.0124125		N
PRKG1	rs12761620	Chr10:51872554	A	C	0.0625	0.0263158	0.195652	0.08	0.0316092	0.0326087	0.0833333	0.115741	0	0	0.179624	0.0150449		N
PRKG1	rs876131	Chr10:51876148	G	A	0.09375	0.0263158	0.217391	0.08	0.0316092	0.0326087	0.222222	0	0.0235887	0	0.214203	0.0150449		N
PRKG1	rs12765057	Chr10:51877040	C	T	0.09375	0.0263158	0.217391	0.08	0.0316092	0.0326087	0.111111	0.12963	0.0235887	0	0.214203	0.0150449		N
PRKG1	rs17631875	Chr10:51877789	T	C	0.90625	0.973684	0.782609	0.92	0.965517	0.967391	0.888889	0.87037	0.0198433	0	0.206326	0.0124125		N
PRKG1	rs2132880286	Chr10:51881494	A	T	0.0625	0	0	0	0	0	0	0	0.185525	NA	NA	NA		N
PRKG1	rs12768953	Chr10:51882617	C	T	0.09375	0.0263158	0.217391	0.08	0.0344828	0.0326087	0	0	0.0198433	0	0.206326	0.0124125		N
PRKG1	rs75542131	Chr10:51889379	G	A	0.09375	0.0263158	0.217391	0.08	0.0344828	0.0326087	0.111111	0.12037	0.0198433	0	0.206326	0.0124125		N
PRKG1	rs36044537	Chr10:51903514	T	C	0.09375	0.0263158	0.217391	0.08	0.0344828	0.0326087	0.111111	0.12037	0.0198433	0	0.206326	0.0124125		N
PRKG1	rs117065651	Chr10:51909502	T	A	0.1875	0.105263	0.0869565	0.12	0.0201149	0	0	0	0.297907	0.127221	0.0862533	0.135142		N
PRKG1	rs1014535211	Chr10:51914551	C	A	0	0.105263	0	0	0.00287356	0	0	0	0	0.226457	0	0		N
PRKG1	rs190725826	Chr10:51944244	A	G	0	0.105263	0.0217391	0	0.00862069	0	0	0	0	0.180098	0.00819935	0		N
PRKG1	rs888345465	Chr10:51961015	C	T	0	0	0.0652174	0.06	0	0	0	0	NA	NA	0.151516	0.132226		N
PRKG1	rs897950763	Chr10:51977801	C	T	0	0	0.0652174	0.06	0	0	0	0	NA	NA	0.151516	0.132226		N
PRKG1	rs151161348	Chr10:51990422	G	A	0	0	0.0652174	0.06	0	0	0	0	NA	NA	0.151516	0.132226		N
PRKG1	rs11000403	Chr10:51993091	C	G	0.4375	0.315789	0.369565	0.4	0.270115	0.0326087	0	0	0.193664	0.08006	0.112438	0.13215		N
PRKG1	rs11000404	Chr10:51993306	C	T	0.4375	0.315789	0.369565	0.4	0.270115	0.0326087	0	0	0.193664	0.08006	0.112438	0.13215		N
PRKG1	rs145465330	Chr10:51994584	C	G	0.0625	0	0	0	0	0	0	0	0.185525	NA	NA	NA		N
PRKG1	rs151243594	Chr10:51998521	C	G	0	0	0.0652174	0.06	0	0	0	0	NA	NA	0.151516	0.132226		N
PRKG1	rs140428355	Chr10:51998702	A	G	0	0	0.0652174	0.06	0	0	0	0	NA	NA	0.151516	0.132226		N
PRKG1	rs4935024	Chr10:52002987	T	C	0.4375	0.315789	0.369565	0.4	0.270115	0.0326087	0	0	0.193664	0.08006	0.112438	0.13215		N
PRKG1	rs4935300	Chr10:52004979	A	G	0.5	0.421053	0.456522	0.4	0.293103	0.0869565	0.0555556	0.0740741	0.188812	0.104889	0.136418	0.0827336		N
PRKG1	rs1903982	Chr10:52006530	A	G	0.46875	0.368421	0.434783	0.4	0.293103	0.0326087	0	0	0.203419	0.104044	0.151642	0.116146		N
PRKG1	rs726195	Chr10:52011325	A	G	0.5	0.421053	0.456522	0.4	0.29023	0.108696	0.361111	0.305556	0.176002	0.0933816	0.126402	0.0736466		N
PRKG1	rs10823953	Chr10:52012559	C	T	0.5	0.578947	0.543478	0.6	0.70977	0.891304	0.638889	0.694444	0.176002	0.0933816	0.126402	0.0736466		N
PRKG1	rs11000454	Chr10:52013185	G	A	0.5	0.578947	0.543478	0.6	0.70977	0.880435	0.638889	0.694444	0.169165	0.0875921	0.120913	0.068927		N
PRKG1	rs11000455	Chr10:52013193	C	A	0.5	0.578947	0.543478	0.6	0.70977	0.880435	0.638889	0.694444	0.169165	0.0875921	0.120913	0.068927		N
PRKG1	rs11000458	Chr10:52013350	C	T	0.5	0.421053	0.456522	0.4	0.29023	0.108696	0.111111	0.134259	0.176684	0.0940571	0.126894	0.074149		N
PRKG1	rs11000459	Chr10:52013524	G	A	0.5	0.421053	0.456522	0.4	0.29023	0.108696	0.361111	0.305556	0.176002	0.0933816	0.126402	0.0736466		N
PRKG1	rs11000462	Chr10:52014356	A	C	0.53125	0.368421	0.434783	0.4	0.304598	0.0434783	0.361111	0.300926	0.242129	0.089291	0.135195	0.10096		N
PRKG1	rs11000463	Chr10:52014359	T	C	0.53125	0.368421	0.434783	0.4	0.304598	0.0434783	0.361111	0.300926	0.242129	0.089291	0.135195	0.10096		N
PRKG1	rs10823956	Chr10:52014651	A	C	0.53125	0.368421	0.434783	0.4	0.304598	0.0326087	0	0	0.251203	0.0993875	0.143201	0.108652		N
PRKG1	rs10823957	Chr10:52014732	G	T	0.53125	0.368421	0.434783	0.4	0.304598	0.0326087	0.111111	0.12963	0.251203	0.0993875	0.143201	0.108652		Y
PRKG1	rs11814876	Chr10:52015032	G	A	0.46875	0.631579	0.565217	0.6	0.695402	0.956522	0.638889	0.699074	0.242129	0.089291	0.135195	0.10096		N
PRKG1	rs11000466	Chr10:52015141	A	T	0.53125	0.368421	0.434783	0.4	0.304598	0.0434783	0.361111	0.300926	0.242129	0.089291	0.135195	0.10096		N
PRKG1	rs11000467	Chr10:52015312	G	C	0.53125	0.368421	0.434783	0.4	0.304598	0.0434783	0.361111	0.300926	0.242129	0.089291	0.135195	0.10096		N
PRKG1	rs11000470	Chr10:52015405	T	C	0.53125	0.368421	0.434783	0.4	0.304598	0.0434783	0.361111	0.300926	0.242129	0.089291	0.135195	0.10096		N
PRKG1	rs11000471	Chr10:52015453	C	T	0.53125	0.368421	0.434783	0.4	0.304598	0.0434783	0.361111	0.300926	0.242129	0.089291	0.135195	0.10096		N
PRKG1	rs61656475	Chr10:52015920	A	T	0.53125	0.368421	0.434783	0.4	0.304598	0.0326087	0.0555556	0.0694444	0.251203	0.0993875	0.143201	0.108652		Y
PRKG1	rs10823960	Chr10:52016604	A	C	0.53125	0.368421	0.434783	0.4	0.304598	0.0326087	0.111111	0.12963	0.251203	0.0993875	0.143201	0.108652		Y
PRKG1	rs10823961	Chr10:52016834	A	T	0.53125	0.368421	0.434783	0.4	0.304598	0.0434783	0.388889	0.319444	0.242129	0.089291	0.135195	0.10096		N
PRKG1	rs1903951	Chr10:52021337	C	T	0.53125	0.368421	0.434783	0.4	0.304598	0.0326087	0	0	0.251203	0.0993875	0.143201	0.108652		N
PRKG1	rs139063682	Chr10:52022204	A	T	0	0.105263	0.0217391	0	0.00862069	0	0	0	0	0.180098	0.00819935	0		N
PRKG1	rs75219163	Chr10:52025918	T	C	0.53125	0.368421	0.434783	0.4	0.304598	0.0543478	0	0	0.233503	0.0802	0.127714	0.0938497		N
PRKG1	rs11000518	Chr10:52028894	G	T	0.5	0.394737	0.434783	0.42	0.284483	0.0326087	0.0833333	0.0277778	0.240026	0.13089	0.158157	0.13949		N
PRKG1	rs10823979	Chr10:52028946	A	G	0.53125	0.447368	0.456522	0.42	0.281609	0.108696	0.0833333	0.0324074	0.216503	0.125097	0.133512	0.0971107		N
PRKG1	rs144917562	Chr10:52047024	A	G	0	0.105263	0.0434783	0.02	0.0114943	0	0	0	-0.000247258	0.163573	0.035011	0.00628314		N
PRKG1	rs909034602	Chr10:52052666	C	A	0.0625	0	0	0	0	0	0	0	0.185525	NA	NA	NA		N
PRKG1	rs1414792544	Chr10:52053829	C	T	0	0	0.0652174	0	0	0	0	0	NA	NA	0.151516	NA		N
PRKG1	rs76691739	Chr10:52078094	A	G	0	0.0789474	0.0869565	0	0.00574713	0	0	0	0	0.140689	0.145307	0		N
PRKG1	rs150187713	Chr10:52082299	A	G	0	0.0526316	0.108696	0.08	0.00862069	0	0	0	0	0.0644597	0.172093	0.110244		N
PRKG1	rs1904015	Chr10:52094306	A	G	0.9375	0.973684	0.978261	1	1	1	1	0.99537	0.185525	0.0676997	0.0463476	NA		N
PRKG1	rs16927021	Chr10:52126987	T	C	0.34375	0.289474	0.173913	0.2	0.20977	0	0	0	0.196516	0.134038	0.046007	0.0561795		N
PRKG1	rs149177837	Chr10:52127451	G	A	0.09375	0.157895	0.173913	0.04	0.0287356	0	0	0	0.0926118	0.194432	0.206666	0.0148814		N
PRKG1	rs7911524	Chr10:52135690	A	C	0.375	0.394737	0.434783	0.18	0.313218	0.0217391	0.194444	0.365741	0.124623	0.123316	0.145649	-0.00997535		N
PRKG1	rs78065157	Chr10:52136374	G	C	0.375	0.394737	0.434783	0.18	0.310345	0.0217391	0.194444	0.365741	0.125821	0.12504	0.147647	-0.00959035		N
PRKG1	rs12413303	Chr10:52136390	G	A	0.8125	0.842105	0.717391	0.6	0.655172	0.25	0.444444	0.476852	0.114289	0.144751	0.041576	-0.0263755		N
PRKG1	rs11000903	Chr10:52136409	A	G	0.375	0.394737	0.434783	0.18	0.310345	0.0217391	0.222222	0.375	0.125821	0.12504	0.147647	-0.00959035		N
PRKG1	rs10762580	Chr10:52137722	C	T	0.8125	0.842105	0.717391	0.6	0.649425	0.26087	0.444444	0.476852	0.117807	0.148679	0.0433555	-0.023995		N
PRKG1	rs3886884	Chr10:52138421	A	G	0.8125	0.842105	0.717391	0.6	0.655172	0.26087	0.444444	0.476852	0.112541	0.143233	0.0399435	-0.027407		N
PRKG1	rs10508967	Chr10:52138987	A	G	0.1875	0.157895	0.282609	0.4	0.347701	0.75	0.611111	0.550926	0.116935	0.147487	0.0432995	-0.024652		N
PRKG1	rs7902533	Chr10:52167209	G	T	0.71875	0.736842	0.76087	0.66	0.612069	0.0652174	0.805556	0.731481	0.133687	0.142545	0.155485	0.083659		N
PRKG1	rs1057404228	Chr10:52167439	T	A	0	0	0.0652174	0	0	0	0	0	NA	NA	0.151516	NA		N
PRKG1	rs7084335	Chr10:52169382	T	G	0.40625	0.473684	0.5	0.46	0.318966	0	0.0833333	0.106481	0.170445	0.208273	0.215383	0.174312		N
PRKG1	rs61847297	Chr10:52169628	G	A	0.40625	0.473684	0.5	0.46	0.316092	0	0.166667	0.125	0.172332	0.210559	0.217785	0.176476		N
PRKG1	rs10762627	Chr10:52169898	A	G	0.28125	0.263158	0.23913	0.34	0.387931	0.934783	0.472222	0.509259	0.133687	0.142545	0.155485	0.083659		N
PRKG1	rs61847298	Chr10:52171162	G	A	0.40625	0.473684	0.5	0.42	0.293103	0	0.111111	0.125	0.186818	0.228676	0.237134	0.160783		N
PRKG1	rs61847300	Chr10:52172315	G	A	0.40625	0.421053	0.434783	0.46	0.301724	0	0.0833333	0.0185185	0.181252	0.178076	0.174483	0.187263		N
PRKG1	rs59769954	Chr10:52174838	T	G	0.1875	0.0789474	0.0869565	0.04	0.0201149	0	0	0	0.29422	0.0794324	0.0862533	0.0177119		N
PRKG1	rs11001067	Chr10:52175059	T	C	0.625	0.578947	0.521739	0.52	0.341954	0	0.166667	0.106481	0.328338	0.277206	0.213369	0.206693		N
PRKG1	rs10824204	Chr10:52176645	A	G	0.65625	0.710526	0.73913	0.66	0.531609	0.23913	0.111111	0.199074	0.0813876	0.129428	0.157655	0.086051		N
PRKG1	rs76972076	Chr10:52180078	G	A	0.625	0.578947	0.521739	0.52	0.324713	0	0	0	0.345054	0.292908	0.22746	0.220724		N
PRKG1	rs75411997	Chr10:52188004	T	G	0.59375	0.578947	0.5	0.48	0.307471	0	0	0	0.335108	0.30955	0.223636	0.200733		N
PRKG1	rs4935317	Chr10:52200936	A	G	0.625	0.578947	0.521739	0.52	0.336207	0	0	0	0.333659	0.282212	0.217863	0.211188		N
PRKG1	rs7917121	Chr10:52211911	T	C	0.71875	0.578947	0.5	0.54	0.431034	0.0652174	0.25	0.425926	0.286335	0.158235	0.091358	0.117298		N
PRKG1	rs73346917	Chr10:52212389	C	A	0.625	0.526316	0.456522	0.46	0.316092	0.0108696	0.166667	0.263889	0.344849	0.243562	0.170782	0.168405		N
PRKG1	rs1875789	Chr10:52212705	G	A	0.28125	0.421053	0.5	0.5	0.557471	0.923913	0.833333	0.708333	0.270473	0.143403	0.0801845	0.077066		N
PRKG1	rs12413824	Chr10:52213369	G	A	0.65625	0.526316	0.5	0.42	0.347701	0	0.0277778	0	0.349268	0.227323	0.190773	0.125724		N
PRKG1	rs10824246	Chr10:52213679	A	G	0.75	0.605263	0.543478	0.44	0.468391	0.076087	0.166667	0.277778	0.275545	0.14606	0.092507	0.029664		N
PRKG1	rs11001209	Chr10:52213927	A	G	0.75	0.605263	0.543478	0.44	0.465517	0.076087	0.166667	0.282407	0.27828	0.148261	0.0938555	0.0310125		N
PRKG1	rs11001213	Chr10:52214302	T	C	0.75	0.605263	0.543478	0.44	0.468391	0.076087	0.166667	0.282407	0.275545	0.14606	0.092507	0.029664		N
PRKG1	rs12411588	Chr10:52214459	C	A	0.65625	0.526316	0.478261	0.38	0.344828	0	0.0277778	0.0277778	0.352162	0.229704	0.176229	0.105713		N
PRKG1	rs2339953	Chr10:52214859	G	A	0.25	0.394737	0.456522	0.5	0.534483	0.923913	0.833333	0.689815	0.27828	0.148261	0.0938555	0.0661945		N
PRKG1	rs16927970	Chr10:52215888	C	G	0.34375	0.473684	0.5	0.58	0.646552	1	0.972222	1	0.343695	0.222798	0.186533	0.123156		N
PRKG1	rs117659232	Chr10:52216054	G	A	0.09375	0.0263158	0.0869565	0.16	0.0172414	0	0	0	0.123904	0.0110943	0.0942551	0.215176		N
PRKG1	rs12414969	Chr10:52216123	G	T	0.625	0.526316	0.478261	0.38	0.313218	0	0	0	0.356874	0.256569	0.20007	0.118644		N
PRKG1	rs16927986	Chr10:52217617	G	A	0.65625	0.526316	0.5	0.42	0.353448	0	0.0277778	0	0.343695	0.222798	0.186533	0.123156		N
PRKG1	rs200813896	Chr10:52219986	A	T	0.59375	0.447368	0.5	0.48	0.341954	0.0108696	0	0	0.29191	0.159419	0.187191	0.164701		N
PRKG1	rs76972382	Chr10:52224207	G	T	0.59375	0.421053	0.478261	0.46	0.344828	0.0108696	0	0	0.289181	0.139637	0.167032	0.147244	DAU,EVK,ORQ	N
PRKG1	rs16928074	Chr10:52226766	T	C	0.625	0.421053	0.478261	0.46	0.347701	0.0108696	0	0	0.313642	0.138406	0.165001	0.145322	DAU,EVK,ORQ	N
PRKG1	rs74436398	Chr10:52227442	C	T	0.625	0.421053	0.478261	0.48	0.347701	0.0217391	0	0	0.305825	0.127035	0.156556	0.153417	DAU,EVK,ORQ	N
PRKG1	rs16928095	Chr10:52227869	G	A	0.625	0.421053	0.478261	0.46	0.347701	0.0108696	0	0	0.313642	0.138406	0.165001	0.145322	DAU,EVK,ORQ	N
PRKG1	rs1110341	Chr10:52232345	G	A	0.59375	0.421053	0.478261	0.46	0.344828	0.0217391	0.0277778	0	0.280624	0.128271	0.15859	0.139148		N
PRKG1	rs930800124	Chr10:52245147	T	G	0.0625	0.0263158	0.0217391	0	0	0	0	0	0.185525	0.0676997	0.0463476	NA	DAU,EVK,ORQ	N
PRKG1	rs79543394	Chr10:52251880	C	A	0.53125	0.315789	0.434783	0.44	0.33046	0.0217391	0.0277778	0	0.238766	0.0707365	0.134789	0.132939		N
PRKG1	rs77530078	Chr10:52251881	T	A	0.53125	0.315789	0.434783	0.44	0.33046	0.0217391	0.0277778	0	0.238766	0.0707365	0.134789	0.132939		N
PRKG1	rs77510299	Chr10:52252561	C	T	0.53125	0.315789	0.434783	0.44	0.327586	0.0108696	0.0277778	0	0.251321	0.085626	0.145895	0.143256		N
PRKG1	rs74372057	Chr10:52253096	G	A	0.53125	0.315789	0.434783	0.44	0.33046	0.0108696	0	0	0.248886	0.084414	0.144021	0.141348		N
PRKG1	rs1194510	Chr10:52253214	A	G	0.40625	0.657895	0.521739	0.56	0.606322	0.869565	0.305556	0.300926	0.171108	-0.008392	0.0669002	0.041296		Y
PRKG1	rs2339955	Chr10:52253603	T	C	0.53125	0.315789	0.434783	0.44	0.327586	0.0108696	0.0555556	0	0.251207	0.085691	0.145822	0.143195		N
PRKG1	rs1194507	Chr10:52254305	A	C	0.40625	0.657895	0.521739	0.56	0.603448	0.869565	0.305556	0.314815	0.168833	-0.009606	0.0652285	0.040082		Y
PRKG1	rs1406477	Chr10:52259860	A	G	0.53125	0.315789	0.434783	0.44	0.327586	0.0108696	0.0555556	0	0.251321	0.085626	0.145895	0.143256		N
PRKG1	rs1534628	Chr10:52261313	G	A	0.40625	0.657895	0.521739	0.56	0.603448	0.869565	0.305556	0.291667	0.168833	-0.009606	0.0652285	0.040082		Y
PRKG1	rs1910541	Chr10:52262176	C	T	0.46875	0.684211	0.565217	0.56	0.66954	0.98913	0.944444	1	0.248886	0.084414	0.144021	0.141348		N
PRKG1	rs75228735	Chr10:52262786	T	C	0.53125	0.315789	0.434783	0.44	0.333333	0.0108696	0.0555556	0	0.24647	0.083199	0.142167	0.139459		N
PRKG1	rs1194514	Chr10:52263814	G	T	0.40625	0.657895	0.543478	0.56	0.600575	0.858696	0.472222	0.407407	0.161347	-0.013272	0.045999	0.0353635		Y
PRKG1	rs16913596	Chr10:52264069	C	T	0.46875	0.684211	0.586957	0.56	0.666667	0.98913	0.944444	1	0.24647	0.083199	0.125754	0.139459		N
PRKG1	rs16913597	Chr10:52264111	C	A	0.53125	0.315789	0.413043	0.44	0.333333	0.0108696	0	0	0.24647	0.083199	0.125754	0.139459	DAU,EVK,ORQ	N
PRKG1	rs74886501	Chr10:52265981	G	A	0.375	0.184211	0.26087	0.16	0.238506	0.0108696	0	0	0.186577	0.0341495	0.075364	0.00849466	DAU,EVK,ORQ	N
PRKG1	rs117881485	Chr10:52266401	T	C	0.375	0.184211	0.26087	0.16	0.238506	0.0108696	0	0	0.186577	0.0341495	0.075364	0.00849466	DAU,EVK,ORQ	N
PRKG1	rs79370901	Chr10:52266553	G	A	0.625	0.815789	0.73913	0.84	0.761494	0.98913	1	1	0.186577	0.0341495	0.075364	0.00849466	DAU,EVK,ORQ	N
PRKG1	rs2339982	Chr10:52266963	C	T	0.375	0.184211	0.26087	0.16	0.238506	0.0108696	0	0	0.186577	0.0341495	0.075364	0.00849466	DAU,EVK,ORQ	N
PRKG1	rs2339983	Chr10:52266976	C	T	0.625	0.815789	0.73913	0.84	0.761494	0.98913	1	1	0.186577	0.0341495	0.075364	0.00849466	DAU,EVK,ORQ	N
PRKG1	rs2339984	Chr10:52267148	C	T	0.375	0.184211	0.26087	0.16	0.238506	0.0108696	0	0	0.186577	0.0341495	0.075364	0.00849466	DAU,EVK,ORQ	N
PRKG1	rs2339986	Chr10:52267254	G	A	0.625	0.815789	0.73913	0.84	0.761494	0.98913	1	1	0.186577	0.0341495	0.075364	0.00849466	DAU,EVK,ORQ	N
PRKG1	rs7095356	Chr10:52267631	A	G	0.375	0.184211	0.26087	0.16	0.238506	0.0108696	0	0	0.186577	0.0341495	0.075364	0.00849466	DAU,EVK,ORQ	N
PRKG1	rs7077931	Chr10:52267684	C	T	0.375	0.184211	0.26087	0.16	0.238506	0.0108696	0	0	0.186577	0.0341495	0.075364	0.00849466	DAU,EVK,ORQ	N
PRKG1	rs77225183	Chr10:52267883	C	T	0.375	0.184211	0.26087	0.16	0.238506	0.0108696	0	0	0.186577	0.0341495	0.075364	0.00849466	DAU,EVK,ORQ	N
PRKG1	rs80318665	Chr10:52268165	G	C	0.625	0.815789	0.73913	0.84	0.758621	0.98913	1	1	0.184366	0.033027	0.0742415	0.00797926	DAU,EVK,ORQ	N
PRKG1	rs16928660	Chr10:52268429	A	G	0.625	0.815789	0.73913	0.84	0.761494	0.98913	1	1	0.186577	0.0341495	0.075364	0.00849466	DAU,EVK,ORQ	N
PRKG1	rs141010757	Chr10:52268475	G	C	0.0625	0.0263158	0.0217391	0	0	0	0	0	0.185525	0.0676997	0.0463476	NA	DAU,EVK,ORQ	N
PRKG1	rs16928683	Chr10:52271060	C	T	0.375	0.184211	0.26087	0.16	0.238506	0.0108696	0	0	0.186577	0.0341495	0.075364	0.00849466	DAU,EVK,ORQ	N
PRKG1	rs16928684	Chr10:52271204	C	G	0.625	0.815789	0.73913	0.84	0.761494	0.98913	1	1	0.186577	0.0341495	0.075364	0.00849466	DAU,EVK,ORQ	N
PRKG1	rs16928710	Chr10:52272051	C	T	0.375	0.184211	0.23913	0.16	0.238506	0.0217391	0	0	0.172122	0.019202	0.049447	-0.00209984	DAU,EVK,ORQ	N
PRKG1	rs16928715	Chr10:52272089	C	G	0.375	0.184211	0.23913	0.16	0.238506	0.0108696	0	0	0.186577	0.0341495	0.061598	0.00849466	DAU,EVK,ORQ	N
PRKG1	rs76977136	Chr10:52272509	G	A	0.625	0.815789	0.73913	0.84	0.761494	0.98913	1	1	0.186577	0.0341495	0.075364	0.00849466	DAU,EVK,ORQ	N
PRKG1	rs79637161	Chr10:52272582	C	A	0.625	0.815789	0.73913	0.84	0.761494	0.98913	1	0.981481	0.186577	0.0341495	0.075364	0.00849466		N
PRKG1	rs12412591	Chr10:52273465	A	G	0.375	0.184211	0.26087	0.16	0.238506	0.0108696	0	0	0.186577	0.0341495	0.075364	0.00849466	DAU,EVK,ORQ	N
PRKG1	rs141072977	Chr10:52275772	T	C	0.0625	0.0263158	0.0217391	0	0	0	0	0	0.185525	0.0676997	0.0463476	NA	DAU,EVK,ORQ	N
PRKG1	rs117428254	Chr10:52276122	G	A	0.375	0.184211	0.26087	0.16	0.238506	0.0108696	0	0	0.186577	0.0341495	0.075364	0.00849466	DAU,EVK,ORQ	N
PRKG1	rs79287620	Chr10:52280051	A	T	0.375	0.184211	0.26087	0.16	0.241379	0.0108696	0	0	0.184224	0.033113	0.0743275	0.00790408		N
PRKG1	rs78346962	Chr10:52280676	G	C	0.375	0.184211	0.26087	0.16	0.241379	0.0108696	0	0	0.184224	0.033113	0.0743275	0.00790408		N
PRKG1	rs139646798	Chr10:52280910	C	T	0.03125	0.105263	0.0434783	0.04	0.0143678	0	0	0	0.0184094	0.149353	0.0292956	0.0234375		N
PRKG1	rs117271768	Chr10:52286727	G	C	0.34375	0.184211	0.26087	0.16	0.238506	0.0108696	0	0	0.157929	0.0342365	0.075451	0.00841897		N
OCA2	rs542394001	Chr15:27719458	T	C	0.96875	1	0.934783	0.94	1	1	1	NA	0.0936797	NA	0.151516	0.132226		N
OCA2	rs191940695	Chr15:27724490	A	G	0.03125	0.0263158	0	0.12	0.00574713	0	0	0	0.0316273	0.0196014	0	0.203812		N
OCA2	rs1391624	Chr15:27724614	G	A	0.375	0.5	0.326087	0.56	0.402299	0.0326087	0.194444	0.25463	0.072968	0.13781	0.0272375	0.171695		N
OCA2	rs1893566949	Chr15:27729443	C	G	0	0	0	0.08	0	0	0	NA	NA	NA	NA	0.17374		N
OCA2	rs148000751	Chr15:27752438	G	A	0.03125	0.0263158	0	0.14	0.00287356	0	0	0	0.0481446	0.0320221	0	0.259842		N
OCA2	rs189679383	Chr15:27752440	G	A	0.03125	0.0263158	0	0.14	0.00287356	0	0	0	0.0481446	0.0320221	0	0.259842		N
OCA2	rs3893201	Chr15:27753157	T	C	0.75	0.789474	0.76087	0.82	0.62931	0.130435	0.166667	0.157407	0.113253	0.145936	0.120913	0.17215		N
OCA2	rs75043266	Chr15:27755021	G	C	0.125	0.0789474	0.173913	0.22	0.0316092	0	0	0	0.140208	0.0584594	0.198057	0.263391		N
OCA2	rs55676645	Chr15:27756888	T	G	0.75	0.763158	0.76087	0.82	0.617816	0.130435	0.138889	NA	0.122747	0.133998	0.131092	0.182773		N
OCA2	rs4411468	Chr15:27758189	A	G	0.21875	0.157895	0.108696	0.16	0.333333	0.804348	0.416667	0.458333	0.0880839	0.143562	0.194254	0.144449		N
OCA2	rs4778177	Chr15:27766748	C	T	0.75	0.789474	0.76087	0.82	0.62069	0.130435	0.138889	0.111111	0.12029	0.153496	0.128613	0.180077		N
OCA2	rs548112121	Chr15:27766812	G	T	0.03125	0.0526316	0.0434783	0.08	0	0	0	0	0.0936797	0.14056	0.101408	0.17374		N
OCA2	rs4778178	Chr15:27767107	C	T	0.25	0.0789474	0.108696	0.16	0.270115	0.695652	0.25	0.287037	0.002687	0.144388	0.119145	0.0708886		N
OCA2	rs4778118	Chr15:27768382	C	T	0.75	0.789474	0.76087	0.82	0.62069	0.130435	0.277778	0.226852	0.12029	0.153496	0.128613	0.180077		N
OCA2	rs4778179	Chr15:27768454	T	C	0.75	0.789474	0.76087	0.82	0.62069	0.130435	0.277778	0.226852	0.12029	0.153496	0.128613	0.180077		N
OCA2	rs117651714	Chr15:27821617	T	C	0.125	0.131579	0.304348	0.3	0.066092	0	0	NA	0.0875201	0.0868701	0.305833	0.288766		N
OCA2	rs12440423	Chr15:27851939	C	T	0.625	0.657895	0.630435	0.72	0.497126	0.119565	0	0	0.124285	0.147294	0.122206	0.19961		N
OCA2	rs79312863	Chr15:27860725	T	C	0	0.0263158	0.0869565	0	0	0	0	0	NA	0.0676997	0.197459	NA		N
OCA2	rs140305885	Chr15:27869357	C	T	0.09375	0	0	0	0.00574713	0	0	0	0.189529	0	0	0		N
OCA2	rs76904626	Chr15:27886287	C	G	0.0625	0.0789474	0.0869565	0.16	0.0316092	0	0	0	0.0415678	0.0584594	0.0637613	0.170025		N
OCA2	rs60007375	Chr15:27892533	T	A	0.21875	0.236842	0.347826	0.48	0.146552	0	0	NA	0.123992	0.127553	0.234065	0.374328		N
OCA2	rs560965252	Chr15:27912619	T	C	0	0.0263158	0	0.08	0	0	0	NA	NA	0.0676997	NA	0.17374		N
OCA2	rs993840450	Chr15:27920918	A	G	0	0.0263158	0.0652174	0	0	0	0	NA	NA	0.0676997	0.151516	NA	EVK,ORQ	N
OCA2	rs74655553	Chr15:27923473	C	T	0.03125	0.0789474	0.0652174	0.14	0.0114943	0	0	0	0.0193449	0.108168	0.0736037	0.208858	DAU,EVK,ORQ,YAK	N
OCA2	rs565732182	Chr15:27930951	G	A	0	0	0.0652174	0	0	0	0	NA	NA	NA	0.151516	NA	ORQ	N
OCA2	rs200271863	Chr15:27949229	T	C	0	0.0263158	0.0869565	0.08	0	0	0	0	NA	0.0676997	0.197459	0.17374		N
OCA2	rs76348953	Chr15:27970402	C	T	0	0.0263158	0.0869565	0.12	0.00862069	0	0	0	0	0.0135899	0.128544	0.187016		N
OCA2	rs74653330	Chr15:27983407	C	T	0.3125	0.289474	0.26087	0.36	0.0229885	0	0	0	0.482109	0.428466	0.362617	0.483238		N
OCA2	rs529147190	Chr15:27989012	C	A	0	0	0	0.08	0	0	0	NA	NA	NA	NA	0.17374		N
OCA2	rs76582321	Chr15:27992293	G	A	0.71875	0.763158	0.717391	0.76	0.41092	0	0	0	0.340133	0.370546	0.321286	0.355239		N
OCA2	rs76339772	Chr15:28008038	T	C	0.09375	0.131579	0.108696	0.12	0.00287356	0	0	0	0.219611	0.276117	0.211867	0.22402		N
OCA2	rs12441727	Chr15:28026629	G	A	0.375	0.447368	0.434783	0.44	0.227011	0.152174	0	0	0.0755896	0.146301	0.132107	0.136441		N
OCA2	rs3794604	Chr15:28026919	C	T	0.34375	0.447368	0.434783	0.44	0.224138	0.152174	0	0	0.0504029	0.148657	0.134363	0.13872		N
OCA2	rs3794603	Chr15:28027178	G	A	0.375	0.447368	0.434783	0.44	0.224138	0.152174	0.0277778	0.0231481	0.0774386	0.148657	0.134363	0.13872		N
OCA2	rs4778231	Chr15:28030885	C	T	0.375	0.447368	0.434783	0.44	0.227011	0.152174	0.0277778	0.0648148	0.0754501	0.146221	0.132054	0.136401		N
OCA2	rs75102342	Chr15:28036843	T	C	0.1875	0.210526	0.23913	0.18	0.0603448	0	0	0	0.181217	0.199441	0.22597	0.136835	EVK,YAK	N
OCA2	rs8024968	Chr15:28038543	C	T	0.34375	0.421053	0.434783	0.48	0.212644	0.173913	0.416667	0.50463	0.0470239	0.116371	0.129789	0.17632		N
OCA2	rs12441035	Chr15:28040856	C	T	0.34375	0.421053	0.434783	0.46	0.212644	0.152174	0	0	0.0580558	0.130352	0.143547	0.169165	EVK,YAK	N
OCA2	rs12324648	Chr15:28041647	C	A	0.3125	0.421053	0.434783	0.48	0.212644	0.173913	0.416667	0.486111	0.0241751	0.116371	0.129789	0.17632		N
OCA2	rs28435540	Chr15:28050509	C	T	0.34375	0.421053	0.434783	0.48	0.212644	0.173913	0.416667	0.490741	0.0470239	0.116371	0.129789	0.17632		N
OCA2	rs76245154	Chr15:28060058	C	A	0.34375	0.394737	0.434783	0.46	0.229885	0.130435	0	0	0.0588256	0.103566	0.14131	0.166962	EVK,YAK	N
OCA2	rs78230778	Chr15:28068162	T	A	0.65625	0.605263	0.565217	0.54	0.764368	0.913043	0.972222	0.967593	0.0807836	0.125795	0.161907	0.186734		N
OCA2	rs73377768	Chr15:28069280	G	A	0.65625	0.552632	0.565217	0.48	0.75	0.891304	0.166667	0.208333	0.0585986	0.152923	0.137044	0.225478		Y
OCA2	rs141063404	Chr15:28073351	T	C	0.34375	0.394737	0.434783	0.46	0.235632	0.076087	0.0277778	0.0324074	0.0886977	0.133401	0.168776	0.193256		N
OCA2	rs6497260	Chr15:28073420	A	G	0.65625	0.552632	0.565217	0.48	0.75	0.902174	0.194444	0.212963	0.06489	0.159844	0.1432	0.231551		Y
OCA2	rs6497262	Chr15:28074029	C	G	0.34375	0.394737	0.434783	0.46	0.235632	0.076087	0.388889	0.412037	0.0886977	0.133401	0.168776	0.193256		N
OCA2	rs148081642	Chr15:28074741	G	A	0.3125	0.394737	0.434783	0.46	0.235632	0.076087	0	0	0.0617212	0.133401	0.168776	0.193256	EVK,YAK	N
OCA2	rs6497263	Chr15:28075515	A	T	0.65625	0.552632	0.565217	0.48	0.75	0.902174	0.194444	0.208333	0.06489	0.159844	0.1432	0.231551		Y
OCA2	rs74739972	Chr15:28075642	T	C	0.34375	0.394737	0.434783	0.46	0.235632	0.076087	0.0277778	0.0324074	0.0886977	0.133401	0.168776	0.193256		N
OCA2	rs78937007	Chr15:28076422	T	C	0.3125	0.394737	0.434783	0.46	0.235632	0.0978261	0.0277778	0.0324074	0.0479093	0.118654	0.155292	0.180371		N
OCA2	rs74596919	Chr15:28079408	A	G	0.34375	0.394737	0.434783	0.46	0.235632	0.076087	0.0277778	0.0324074	0.0886977	0.133401	0.168776	0.193256		N
OCA2	rs116978932	Chr15:28079766	G	A	0.34375	0.394737	0.434783	0.46	0.232759	0.076087	0	0	0.0906016	0.135713	0.171354	0.195979	EVK,YAK	N
OCA2	rs200072034	Chr15:28080103	T	G	0.0625	0	0	0	0	0	0	NA	0.185525	NA	NA	NA		N
OCA2	rs75558287	Chr15:28084701	C	T	0	0	0.0217391	0.14	0.00574713	0	0	0	0	0	0.010521	0.240327	YAK	N
TBX15	rs190281538	Chr1:118884588	G	A	0.0625	0	0.173913	0.12	0	0	0	0	0.185525	NA	0.345078	0.248735		N
TBX15	rs12410424	Chr1:118886431	T	A	0.375	0.552632	0.630435	0.6	0.41954	0.141304	0	0.00462963	-0.005387	0.10587	0.174349	0.144244		Y
TBX15	rs183281969	Chr1:118891686	T	G	0	0.131579	0.130435	0.02	0.0114943	0	0	0	-0.000247258	0.217757	0.19864	0.00628314		N
TBX15	rs1241117371	Chr1:118896508	G	C	0.0625	0	0	0	0	0	0	NA	0.185525	NA	NA	NA		N
TBX15	rs999429984	Chr1:118897084	A	G	0	0	0.108696	0	0	0	0	NA	NA	NA	0.235234	NA		N
TBX15	rs2282322	Chr1:118903378	G	A	0.375	0.552632	0.630435	0.6	0.41954	0.141304	0	0.00462963	-0.005387	0.10587	0.174349	0.144244		Y
TBX15	rs147682611	Chr1:118907635	G	C	0	0	0	0.12	0.00574713	0	0	0	0	0	0	0.203812		N
TBX15	rs187121862	Chr1:118910456	T	C	0	0	0	0.12	0	0	0	0	NA	NA	NA	0.248735		N
TBX15	rs147883489	Chr1:118914757	G	A	0	0	0	0.12	0.00574713	0	0	0	0	0	0	0.203812	YAK	N
TBX15	rs140662992	Chr1:118919458	T	A	0	0	0	0.12	0.00574713	0	0	0	0	0	0	0.203812	YAK	N
TBX15	rs142815404	Chr1:118921646	G	A	0	0	0	0.12	0.00574713	0	0	0	0	0	0	0.203812	YAK	N
TBX15	rs147993592	Chr1:118924395	G	A	0	0	0	0.12	0.00574713	0	0	0	0	0	0	0.203812	YAK	N
TBX15	rs142817332	Chr1:118925114	C	T	0	0	0	0.12	0.00574713	0	0	0	0	0	0	0.203812	YAK	N
TBX15	rs538406429	Chr1:118925440	T	C	0	0	0	0.08	0	0	0	0	NA	NA	NA	0.17374	YAK	N
TBX15	rs149596055	Chr1:118925477	C	T	0	0	0	0.12	0.00574713	0	0	0	0	0	0	0.203812	YAK	N
TBX15	rs143546776	Chr1:118926073	A	C	0	0	0	0.12	0.00574713	0	0	0	0	0	0	0.203812	YAK	N
TBX15	rs79904226	Chr1:118928527	A	C	0	0	0	0.12	0.00574713	0	0	0	0	0	0	0.203812	YAK	N
TBX15	rs142929529	Chr1:118928914	C	T	0	0	0	0.12	0.00574713	0	0	0	0	0	0	0.203812	YAK	N
TBX15	rs143592494	Chr1:118928968	G	A	0	0	0	0.12	0.00574713	0	0	0	0	0	0	0.203812	YAK	N
TBX15	rs145402535	Chr1:118932076	G	C	0	0	0	0.12	0.00574713	0	0	0	0	0	0	0.203812	YAK	N
TBX15	rs1571185467	Chr1:118932129	T	C	0	0	0.0869565	0	0	0	0	NA	NA	NA	0.197459	NA		N
TBX15	rs148772820	Chr1:118932157	C	T	0	0	0	0.12	0.00574713	0	0	0	0	0	0	0.203812	YAK	N
TBX15	rs575221347	Chr1:118934372	A	G	0	0	0	0.1	0	0	0	NA	NA	NA	NA	0.21246	YAK	N
TBX15	rs75590744	Chr1:118934743	G	A	0	0	0	0.12	0.00574713	0	0	0	0	0	0	0.203812	YAK	N
TBX15	rs187606966	Chr1:118939341	G	A	0.0625	0	0	0	0	0	0	0	0.185525	NA	NA	NA		N
TBX15	rs76282130	Chr1:118947295	A	G	0	0	0	0.12	0.00574713	0	0	0	0	0	0	0.203812	YAK	N
TBX15	rs192875514	Chr1:118950496	T	C	0	0	0	0.12	0.00574713	0	0	0	0	0	0	0.203812	YAK	N
TBX15	rs145774077	Chr1:118956081	C	T	0	0	0	0.12	0.00574713	0	0	0	0	0	0	0.203812	YAK	N
TBX15	rs147675313	Chr1:118956517	G	A	0	0	0	0.12	0.00574713	0	0	0	0	0	0	0.203812	YAK	N
TBX15	rs142336195	Chr1:118956518	C	T	0	0	0	0.12	0.00574713	0	0	0	0	0	0	0.203812	YAK	N
TBX15	rs184975064	Chr1:118956949	C	T	0	0	0	0.12	0.00574713	0	0	0	0	0	0	0.203812	YAK	N
TBX15	rs190238702	Chr1:118957007	A	G	0	0	0	0.12	0.00574713	0	0	0	0	0	0	0.203812	YAK	N
TBX15	rs148683935	Chr1:118957975	T	C	1	1	1	0.88	0.994253	1	1	1	0	0	0	0.203812	YAK	N
TBX15	rs76476976	Chr1:118958572	A	T	0	0	0	0.12	0.00574713	0	0	0	0	0	0	0.203812	YAK	N
TBX15	rs145359151	Chr1:118960328	C	T	0	0	0	0.12	0.00574713	0	0	0	0	0	0	0.203812	YAK	N
TBX15	rs984222	Chr1:118961220	G	C	0.28125	0.289474	0.108696	0.18	0.376437	0.413043	0.722222	0.666667	0.00917655	0.00888026	0.155527	0.0856844		Y
TBX15	rs984225	Chr1:118961661	G	A	0.71875	0.710526	0.891304	0.82	0.617816	0.586957	0.277778	0.333333	0.0100758	0.00972721	0.157685	0.0875251		Y
TBX15	rs1409157	Chr1:118961864	G	T	0.71875	0.710526	0.891304	0.7	0.612069	0.576087	0.277778	0.333333	0.0146478	0.0139844	0.165475	0.0117938		Y
TBX15	rs10923712	Chr1:118962811	A	G	0.28125	0.289474	0.108696	0.18	0.382184	0.413043	0.722222	0.666667	0.0100758	0.00972721	0.157685	0.0875251		Y
TBX15	rs143068764	Chr1:118964381	T	G	0	0	0	0.12	0.00574713	0	0	0	0	0	0	0.203812	YAK	N
TBX15	rs147010435	Chr1:118965012	G	A	0	0	0	0.12	0.00574713	0	0	0	0	0	0	0.203812	YAK	N
TBX15	rs149389303	Chr1:118966337	G	T	0	0	0	0.12	0.00574713	0	0	0	0	0	0	0.203812	YAK	N
TBX15	rs144727230	Chr1:118966908	A	G	0	0.131579	0.130435	0.02	0.0114943	0	0	0	-0.000247258	0.217757	0.19864	0.00628314	YAK	N
TBX15	rs10923713	Chr1:118967864	T	C	0.28125	0.289474	0.108696	0.18	0.382184	0.423913	0.722222	0.666667	0.013307	0.0127548	0.163066	0.0922956		Y
TBX15	rs148828949	Chr1:118969590	T	C	1	1	1	0.88	0.994253	1	1	1	0	0	0	0.203812	YAK	N
TBX15	rs143953781	Chr1:118970887	C	T	0	0	0	0.12	0.00574713	0	0	0	0	0	0	0.203812	YAK	N
TBX15	rs140228682	Chr1:118971320	C	G	0	0	0	0.12	0.00574713	0	0	0	0	0	0	0.203812	YAK	N
TBX15	rs142884883	Chr1:118973062	C	T	0	0	0	0.12	0.00574713	0	0	0	0	0	0	0.203812	YAK	N
TBX15	rs146091011	Chr1:118973177	A	G	0	0	0	0.12	0.00574713	0	0	0	0	0	0	0.203812	YAK	N
TBX15	rs10802069	Chr1:118974734	C	T	0.28125	0.289474	0.108696	0.18	0.382184	0.423913	0.694444	0.643519	0.013307	0.0127548	0.163066	0.0922956		Y
TBX15	rs141961744	Chr1:118975818	G	C	0	0	0	0.12	0.00574713	0	0	0	0	0	0	0.203812	YAK	N
TBX15	rs74447588	Chr1:118976988	T	C	0	0	0	0.12	0.00574713	0	0	0	0	0	0	0.203812	YAK	N
TBX15	rs74922362	Chr1:118982241	G	A	0	0	0	0.12	0.00287356	0	0	0	0	0	0	0.22402	YAK	N
TBX15	rs73011330	Chr1:118985223	G	C	1	1	1	0.88	0.997126	1	0.888889	0.953704	0	0	0	0.22402		N
TBX15	rs139046048	Chr1:118986851	A	T	0	0	0	0.12	0.00287356	0	0	0	0	0	0	0.22402	YAK	N
TBX15	rs1380501703	Chr1:118988016	G	A	0	0	0	0.08	0	0	0	NA	NA	NA	NA	0.17374	YAK	N
TBX15	rs78197990	Chr1:118988463	G	A	1	1	1	0.88	0.997126	1	1	1	0	0	0	0.22402	YAK	N
TBX15	rs182381477	Chr1:118989477	C	G	0	0	0	0.12	0.00287356	0	0	0	0	0	0	0.22402	YAK	N
WARS2	rs12030972	Chr1:119031666	G	A	0.625	0.736842	0.673913	0.6	0.531609	0.173913	0	0	0.074383	0.171248	0.113755	0.0569245	DAU,EVK,ORQ,YAK	Y
WARS2	rs12026409	Chr1:119031914	G	A	0.625	0.736842	0.673913	0.6	0.531609	0.173913	0	0	0.074383	0.171248	0.113755	0.0569245	DAU,EVK,ORQ,YAK	Y
WARS2	rs2645294	Chr1:119031964	T	C	0.28125	0.157895	0.0869565	0.18	0.327586	0.413043	0.472222	0.472222	0.00297901	0.0802895	0.156821	0.0653461		Y
WARS2	rs12406338	Chr1:119034579	C	T	0.6875	0.736842	0.695652	0.72	0.557471	0.173913	0	0	0.105172	0.149255	0.112641	0.134102	DAU,EVK,ORQ,YAK	Y
WARS2	rs3790553	Chr1:119036653	A	G	0.34375	0.552632	0.521739	0.48	0.261494	0.173913	0	0	0.0238928	0.21538	0.1814	0.138277	DAU,EVK,ORQ,YAK	Y
WARS2	rs148212598	Chr1:119038186	G	A	0	0	0	0.12	0.00287356	0	0	0	0	0	0	0.22402	YAK	N
WARS2	rs190203306	Chr1:119039501	A	G	0	0	0	0.12	0.00287356	0	0	0	0	0	0	0.22402	YAK	N
WARS2	rs878006	Chr1:119040799	A	G	0.625	0.815789	0.673913	0.6	0.58046	0.206522	0	0	0.0392065	0.196067	0.0697607	0.0239855	DAU,EVK,ORQ,YAK	Y
WARS2	rs114473983	Chr1:119042156	C	T	0	0	0.0434783	0.14	0.00287356	0	0	0	0	0	0.0695224	0.259842	ORQ,YAK	Y
WARS2	rs143494742	Chr1:119042366	G	C	0	0	0	0.12	0.00287356	0	0	0	0	0	0	0.22402	YAK	N
WARS2	rs79570247	Chr1:119044653	G	A	0	0	0	0.12	0.00287356	0	0	0	0	0	0	0.22402	YAK	N
WARS2	rs17023164	Chr1:119046720	C	T	0.625	0.815789	0.673913	0.6	0.58046	0.217391	0	0	0.0359255	0.193538	0.0670358	0.021569	DAU,EVK,ORQ,YAK	Y
WARS2	rs144624720	Chr1:119048021	T	C	0	0	0	0.12	0.00287356	0	0	0	0	0	0	0.22402	YAK	N
WARS2	rs190917221	Chr1:119049651	C	A	0	0	0	0.12	0.00287356	0	0	0	0	0	0	0.22402	YAK	N
WARS2	rs10923738	Chr1:119052040	G	A	0.5625	0.736842	0.652174	0.6	0.520115	0.173913	0	NA	0.0434535	0.18115	0.104167	0.063069	DAU,EVK,ORQ,YAK	Y
WARS2	rs140949061	Chr1:119053036	A	C	0	0	0	0.12	0.00287356	0	0	0	0	0	0	0.22402	YAK	N
WARS2	rs140051799	Chr1:119053551	T	C	0	0	0	0.12	0.00287356	0	0	0	0	0	0	0.22402	YAK	N
WARS2	rs182616509	Chr1:119054811	A	G	0	0	0	0.12	0.00287356	0	0	0	0	0	0	0.22402	YAK	N
WARS2	rs142757734	Chr1:119056665	A	C	0	0	0	0.12	0.00287356	0	0.0277778	NA	0	0	0	0.22402		N
WARS2	rs57718184	Chr1:119056690	C	T	0.375	0.184211	0.326087	0.28	0.428161	0.782609	1	1	0.040608	0.20117	0.0730353	0.11226	YAK	Y
WARS2	rs143460327	Chr1:119059690	G	A	0	0	0	0.12	0.00287356	0	0	0	0	0	0	0.22402	YAK	N
WARS2	rs12034909	Chr1:119059758	A	T	0.625	0.815789	0.673913	0.6	0.58046	0.217391	0	0.00462963	0.0359255	0.193538	0.0670358	0.021569	YAK	Y
WARS2	rs12036464	Chr1:119059792	T	C	0.625	0.815789	0.673913	0.6	0.58046	0.25	0	0	0.0289015	0.187211	0.0605728	0.0163415	YAK	Y
WARS2	rs191656851	Chr1:119062399	G	C	0	0	0	0.12	0.00287356	0	0	0	0	0	0	0.22402	YAK	N
WARS2	rs180704634	Chr1:119062771	G	C	0	0	0	0.12	0.00287356	0	0	0	0	0	0	0.22402	YAK	N
WARS2	rs190897655	Chr1:119065069	A	T	0	0	0	0.12	0.00287356	0	0	0	0	0	0	0.22402	YAK	N
WARS2	rs552821090	Chr1:119065626	C	T	0	0	0	0.1	0.00287356	0	0	0	0	0	0	0.186022	YAK	N
WARS2	rs76684941	Chr1:119068606	G	C	0	0	0	0.12	0.00287356	0	0	0	0	0	0	0.22402	YAK	N
WARS2	rs140427129	Chr1:119073595	G	C	0	0	0	0.12	0.00287356	0	0	0	0	0	0	0.22402	YAK	N
WARS2	rs181843709	Chr1:119083884	C	T	0	0	0	0.12	0.00287356	0	0	0	0	0	0	0.22402	YAK	N
WARS2	rs190460825	Chr1:119084437	A	G	0	0	0	0.12	0.00287356	0	0	0	0	0	0	0.22402	YAK	N
WARS2	rs148015490	Chr1:119086064	T	G	0.125	0.131579	0.26087	0.26	0.00862069	0	0	0	0.23906	0.230703	0.422096	0.409974	YAK	N
WARS2	rs188075914	Chr1:119086926	T	C	0	0	0	0.12	0.00287356	0	0	0	0	0	0	0.22402	YAK	N
WARS2	rs193047360	Chr1:119087210	A	C	0	0	0	0.12	0.00287356	0	0	0	0	0	0	0.22402	YAK	N
WARS2	rs191216334	Chr1:119089175	C	T	0	0	0	0.12	0.00287356	0	0	0	0	0	0	0.22402	YAK	N
WARS2	rs146279067	Chr1:119094113	G	A	0	0	0	0.12	0.00287356	0	0	0	0	0	0	0.22402	YAK	N
WARS2	rs182073935	Chr1:119098362	C	T	0	0	0	0.12	0.00287356	0	0	0	0	0	0	0.22402	YAK	N
WARS2	rs138426501	Chr1:119099208	C	T	0	0	0	0.12	0.00287356	0	0	0	0	0	0	0.22402	YAK	N
WARS2	rs145278702	Chr1:119099743	G	A	0	0	0	0.12	0.00287356	0	0	0	0	0	0	0.22402	YAK	N
WARS2	rs192194564	Chr1:119100328	A	G	0	0	0	0.12	0.00287356	0	0	0	0	0	0	0.22402	YAK	N
WARS2	rs184140160	Chr1:119100730	G	A	0	0	0	0.12	0.00287356	0	0	0	0	0	0	0.22402	YAK	N
WARS2	rs2101461069	Chr1:119102064	G	A	0.0625	0	0	0	0	0	0	NA	0.185525	NA	NA	NA		N
WARS2	rs77139744	Chr1:119102483	C	T	0	0	0	0.12	0.00287356	0	0	0	0	0	0	0.22402	YAK	N
WARS2	rs186345374	Chr1:119106926	T	C	0	0	0	0.12	0.00287356	0	0	0	0	0	0	0.22402	YAK	N
WARS2	rs187790466	Chr1:119107145	T	A	0	0	0	0.12	0.00287356	0	0	0	0	0	0	0.22402	YAK	N
WARS2	rs140728947	Chr1:119108072	A	G	0	0	0	0.12	0.00287356	0	0	0	0	0	0	0.22402	YAK	N
WARS2	rs139427133	Chr1:119109504	G	A	0	0	0	0.12	0.00287356	0	0	0	0	0	0	0.22402	YAK	N
WARS2	rs12408286	Chr1:119109978	C	T	0.5625	0.684211	0.630435	0.6	0.502874	0.184783	0	0	0.0481595	0.143111	0.0958645	0.0716355	YAK	Y
WARS2	rs587636119	Chr1:119112092	T	C	0	0	0	0.12	0.00287356	0	0	0	0	0	0	0.22402	YAK	N
WARS2	rs139169621	Chr1:119113350	T	C	0	0	0	0.12	0.00287356	0	0	0	0	0	0	0.22402	YAK	N
WARS2	rs148506693	Chr1:119114471	A	T	0	0	0	0.12	0.00287356	0	0	0	0	0	0	0.22402	YAK	N
WARS2	rs12031585	Chr1:119115315	T	C	0.625	0.763158	0.673913	0.62	0.571839	0.25	0	0	0.0326015	0.142752	0.0664372	0.0314925	YAK	Y
WARS2	rs75061125	Chr1:119117653	C	T	0	0	0	0.12	0.00287356	0	0	0.0509259	0	0	0	0.22402		N
WARS2	rs10923753	Chr1:119120176	A	G	0.625	0.763158	0.673913	0.62	0.571839	0.25	0	0	0.0326015	0.142752	0.0664372	0.0314925	YAK	Y
WARS2	rs139050907	Chr1:119122711	A	G	0	0	0	0.12	0.00287356	0	0	0	0	0	0	0.22402	YAK	N
WARS2	rs148437530	Chr1:119126887	C	T	0.09375	0.131579	0.26087	0.28	0.00862069	0	0	0	0.16729	0.230703	0.422096	0.436682	YAK	N
WARS2	rs147152332	Chr1:119127528	C	T	0	0	0	0.12	0.00287356	0	0	0	0	0	0	0.22402	YAK	N
WARS2	rs115464885	Chr1:119128376	C	T	0	0	0	0.12	0.00287356	0	0	0.0138889	0	0	0	0.22402		N
WARS2	rs587765100	Chr1:119128594	C	G	0	0	0	0.12	0.00287356	0	0	0	0	0	0	0.22402	YAK	N
WARS2	rs80060608	Chr1:119128933	A	G	0	0	0	0.12	0.00287356	0	0	0	0	0	0	0.22402	YAK	N
WARS2	rs186808984	Chr1:119131740	C	T	0	0	0	0.12	0.00287356	0	0	0.0138889	0	0	0	0.22402		N
WARS2	rs79602402	Chr1:119134221	C	A	0	0	0	0.12	0.00287356	0	0	0	0	0	0	0.22402	YAK	N
WARS2	rs76268471	Chr1:119137228	T	C	0	0	0	0.12	0.00287356	0	0	0.0138889	0	0	0	0.22402		N
HS3ST4	rs7188668	Chr16:25700037	A	C	0.625	0.421053	0.369565	0.34	0.387931	0.23913	0.25	0.333333	0.15625	0.0099536	-0.0078201	-0.0166736		N
HS3ST4	rs7190312	Chr16:25700065	T	C	0.625	0.421053	0.369565	0.34	0.387931	0.23913	0.222222	0.226852	0.15625	0.0099536	-0.0078201	-0.0166736		N
HS3ST4	rs1489398933	Chr16:25702586	G	T	0	0.0789474	0.0217391	0	0.00287356	0	0	0	0	0.166373	0.0194882	0		N
HS3ST4	rs144151241	Chr16:25702858	T	C	0.9375	0.894737	0.956522	0.94	0.997126	1	1	1	0.137766	0.226457	0.0695224	0.103136		N
HS3ST4	rs78746750	Chr16:25703943	A	G	0.1875	0.105263	0.0652174	0.06	0.0373563	0	0	0	0.230134	0.0827266	0.031623	0.0208959		N
HS3ST4	rs34015379	Chr16:25706900	G	T	0.5	0.236842	0.304348	0.14	0.195402	0.108696	0	0	0.268394	0.0140168	0.0575771	-0.0094358		N
HS3ST4	rs1276930014	Chr16:25712261	T	G	0	0	0.0869565	0	0	0	0	NA	NA	NA	0.191445	NA		N
HS3ST4	rs190683792	Chr16:25725520	T	C	0.0625	0.0526316	0	0.04	0	0	0	0	0.185525	0.14056	NA	0.0875008		N
HS3ST4	rs4787745	Chr16:25726819	A	G	0.40625	0.210526	0.26087	0.24	0.16092	0.0217391	0.25	0.259259	0.28118	0.0647892	0.102624	0.0799861		N
HS3ST4	rs73524783	Chr16:25731576	A	G	0.3125	0.236842	0.23913	0.26	0.155172	0	0.166667	0.208333	0.212927	0.123585	0.11279	0.126788		N
HS3ST4	rs138233968	Chr16:25731890	G	T	0.0625	0	0.0434783	0.14	0.00287356	0	0	0	0.137766	0	0.0695224	0.256858		N
HS3ST4	rs145054662	Chr16:25734322	G	A	0	0.0526316	0.0652174	0.14	0.00287356	0	0	0	0	0.100544	0.119741	0.259842		N
HS3ST4	rs11639702	Chr16:25736492	A	G	0.6875	0.631579	0.782609	0.76	0.603448	0.184783	0.25	0.236111	0.0697225	0.0352065	0.148578	0.128737		N
HS3ST4	rs79348807	Chr16:25748992	C	G	0	0.157895	0.0434783	0.1	0.045977	0	0	0	-0.00739723	0.151467	0.0132863	0.0594406		N
HS3ST4	rs148735435	Chr16:25757136	A	C	0	0.0526316	0.0217391	0.1	0	0	0	0	NA	0.14056	0.0463476	0.21246		N
HS3ST4	rs11074714	Chr16:25759427	A	G	0.59375	0.578947	0.717391	0.64	0.514368	0.141304	0.333333	0.212963	0.0789675	0.0663635	0.176385	0.107015		N
HS3ST4	rs62034456	Chr16:25760505	A	G	0.59375	0.578947	0.717391	0.64	0.514368	0.141304	0.305556	0.217593	0.0789675	0.0663635	0.176385	0.107015		N
HS3ST4	rs11640076	Chr16:25761466	A	G	0.59375	0.578947	0.717391	0.64	0.514368	0.141304	0.305556	0.222222	0.0789675	0.0663635	0.176385	0.107015		N
HS3ST4	rs76569071	Chr16:25764777	C	G	0.28125	0.184211	0.26087	0.32	0.123563	0	0	0	0.211789	0.0948664	0.1608	0.222099		N
HS3ST4	rs1596567049	Chr16:25775589	C	T	0	0.0263158	0.0869565	0	0	0	0	NA	NA	0.0676997	0.191445	NA		N
HS3ST4	rs139551324	Chr16:25830711	A	G	0.1875	0.157895	0.217391	0.1	0.0718391	0	0	0	0.160126	0.110063	0.173802	0.0417912		N
HS3ST4	rs1219434151	Chr16:25836966	G	C	0.0625	0	0	0	0	0	0	NA	0.185525	NA	NA	NA		N
HS3ST4	rs56963146	Chr16:25844941	G	A	0.1875	0.210526	0.23913	0.38	0.181034	0.0652174	0.111111	0.157407	0.00772515	0.0210647	0.0365385	0.165973		N
HS3ST4	rs12444316	Chr16:25845230	C	T	0.1875	0.210526	0.23913	0.38	0.181034	0.0652174	0.111111	0.157407	0.00772515	0.0210647	0.0365385	0.165973		N
HS3ST4		Chr16:25851108	C	T	0	0.0263158	0.0652174	0	0	0	0	NA	NA	0.0676997	0.151516	NA		N
HS3ST4	rs55633735	Chr16:25858287	G	T	0.40625	0.236842	0.434783	0.22	0.247126	0.0978261	0.166667	0.171296	0.12377	0.0027656	0.145517	-0.0047547		N
HS3ST4	rs11864209	Chr16:25859154	A	G	0.59375	0.763158	0.565217	0.78	0.752874	0.902174	0.694444	0.712963	0.12377	0.0027656	0.145517	-0.0047547		N
HS3ST4	rs8051140	Chr16:25859257	A	T	0.40625	0.236842	0.434783	0.22	0.247126	0.0978261	0.166667	0.171296	0.12377	0.0027656	0.145517	-0.0047547		N
HS3ST4	rs72780736	Chr16:25861563	G	T	0.40625	0.236842	0.434783	0.22	0.247126	0.0978261	0.25	0.259259	0.12377	0.0027656	0.145517	-0.0047547		N
HS3ST4	rs6650561	Chr16:25862355	G	A	0.40625	0.236842	0.434783	0.22	0.247126	0.0978261	0.166667	0.171296	0.12377	0.0027656	0.145517	-0.0047547		N
HS3ST4	rs6650562	Chr16:25862392	T	C	0.40625	0.236842	0.434783	0.22	0.247126	0.0978261	0.166667	0.171296	0.12377	0.0027656	0.145517	-0.0047547		N
HS3ST4	rs6650563	Chr16:25862424	C	A	0.40625	0.236842	0.434783	0.22	0.247126	0.0978261	0.25	0.259259	0.12377	0.0027656	0.145517	-0.0047547		N
HS3ST4	rs6497896	Chr16:25862665	G	A	0.59375	0.763158	0.565217	0.78	0.752874	0.902174	0.694444	0.712963	0.12377	0.0027656	0.145517	-0.0047547		N
HS3ST4	rs6650564	Chr16:25862908	G	A	0.59375	0.763158	0.565217	0.78	0.752874	0.902174	0.694444	0.712963	0.12377	0.0027656	0.145517	-0.0047547		N
HS3ST4	rs9935516	Chr16:25863123	T	C	0.40625	0.236842	0.434783	0.22	0.247126	0.0978261	0.305556	0.287037	0.12377	0.0027656	0.145517	-0.0047547		N
HS3ST4	rs9924933	Chr16:25863179	G	A	0.40625	0.236842	0.434783	0.22	0.247126	0.0978261	0.305556	0.287037	0.12377	0.0027656	0.145517	-0.0047547		N
HS3ST4	rs9924781	Chr16:25863182	C	T	0.40625	0.236842	0.434783	0.22	0.247126	0.0978261	0.305556	0.287037	0.12377	0.0027656	0.145517	-0.0047547		N
HS3ST4	rs9924868	Chr16:25863271	C	T	0.40625	0.236842	0.434783	0.22	0.247126	0.0978261	0.305556	0.287037	0.12377	0.0027656	0.145517	-0.0047547		N
HS3ST4	rs9924880	Chr16:25863327	T	C	0.59375	0.763158	0.565217	0.78	0.752874	0.902174	0.694444	0.712963	0.12377	0.0027656	0.145517	-0.0047547		N
HS3ST4	rs72780740	Chr16:25863505	G	A	0.40625	0.236842	0.434783	0.22	0.247126	0.0978261	0.166667	0.171296	0.12377	0.0027656	0.145517	-0.0047547		N
HS3ST4	rs72780743	Chr16:25863612	C	T	0.40625	0.236842	0.434783	0.22	0.247126	0.0978261	0.25	0.259259	0.12377	0.0027656	0.145517	-0.0047547		N
HS3ST4	rs6650557	Chr16:25864033	G	A	0.40625	0.236842	0.434783	0.22	0.247126	0.0978261	0.166667	0.171296	0.12377	0.0027656	0.145517	-0.0047547		N
HS3ST4	rs6650559	Chr16:25864102	C	T	0.40625	0.236842	0.434783	0.22	0.247126	0.0978261	0.305556	0.287037	0.12377	0.0027656	0.145517	-0.0047547		N
HS3ST4	rs6650565	Chr16:25864146	A	T	0.40625	0.236842	0.434783	0.22	0.247126	0.0978261	0.305556	0.287037	0.12377	0.0027656	0.145517	-0.0047547		N
HS3ST4	rs6650566	Chr16:25864239	C	T	0.40625	0.236842	0.434783	0.22	0.247126	0.0978261	0.25	0.259259	0.12377	0.0027656	0.145517	-0.0047547		N
HS3ST4	rs72780747	Chr16:25864846	G	C	0.40625	0.236842	0.434783	0.22	0.229885	0.0978261	0.0277778	0.00925926	0.137483	0.00843675	0.160281	0.00091645		N
HS3ST4	rs72780749	Chr16:25865731	T	C	0.59375	0.763158	0.565217	0.78	0.752874	0.902174	0.861111	0.912037	0.12377	0.0027656	0.145517	-0.0047547		N
HS3ST4	rs7202736	Chr16:25865923	A	T	0.40625	0.236842	0.434783	0.22	0.247126	0.0869565	0.111111	0.0972222	0.132433	0.0071886	0.152476	-0.0018757		N
HS3ST4	rs6497898	Chr16:25866196	G	A	0.40625	0.236842	0.434783	0.22	0.247126	0.0978261	0.111111	0.0972222	0.12377	0.0027656	0.145517	-0.0047547		N
HS3ST4	rs6497899	Chr16:25866223	G	A	0.40625	0.236842	0.434783	0.22	0.247126	0.0978261	0.111111	0.0972222	0.12377	0.0027656	0.145517	-0.0047547		N
HS3ST4	rs79417690	Chr16:25867961	A	C	0.40625	0.236842	0.456522	0.28	0.25	0.0978261	0.0277778	0.00925926	0.121578	0.00179395	0.165421	0.0227134		N
HS3ST4	rs556428227	Chr16:25869258	G	A	0	0	0	0.1	0	0	0	NA	NA	NA	NA	0.21246		N
HS3ST4	rs34215460	Chr16:25877144	C	T	0.3125	0.421053	0.26087	0.34	0.454023	0.771739	0.5	0.712963	0.0993836	0.0251125	0.148243	0.077696		N
HS3ST4	rs35384311	Chr16:25877238	T	A	0.6875	0.578947	0.73913	0.66	0.545977	0.228261	0.5	0.287037	0.0993836	0.0251125	0.148243	0.077696		N
HS3ST4	rs4435255	Chr16:25880508	T	C	0.25	0.184211	0.391304	0.14	0.12931	0.0326087	0.0833333	0.0648148	0.117458	0.0468621	0.271825	0.0153285		N
HS3ST4	rs2141664541	Chr16:25882233	C	T	0	0.0263158	0.0869565	0	0	0	0	NA	NA	0.0676997	0.191445	NA		N
HS3ST4	rs8058166	Chr16:25885057	A	G	0.4375	0.631579	0.586957	0.44	0.393678	0.173913	0.833333	NA	0.0282956	0.184193	0.140432	0.0293047		N
HS3ST4	rs34935475	Chr16:25885503	G	T	0.1875	0.184211	0.347826	0.1	0.103448	0.0326087	0.361111	0.106481	0.0679193	0.0647045	0.256065	0.00184105		N
HS3ST4	rs148145365	Chr16:25887008	G	C	0.0625	0.131579	0.23913	0.1	0.0172414	0	0	0	0.062338	0.188588	0.350935	0.113416		N
HS3ST4	rs74385048	Chr16:25887151	G	A	0.34375	0.368421	0.478261	0.4	0.295977	0.0434783	0	0	0.08654	0.094753	0.181698	0.109438		N
HS3ST4	rs3935612	Chr16:25887949	G	A	0.6875	0.868421	0.782609	0.72	0.655172	0.163043	0.305556	0.282407	0.0463795	0.184438	0.108371	0.060209		N
HS3ST4	rs3934987	Chr16:25888336	A	G	0.6875	0.868421	0.782609	0.72	0.655172	0.163043	0.305556	0.273148	0.0463795	0.184438	0.108371	0.060209		N
HS3ST4	rs13334227	Chr16:25889204	T	C	0.6875	0.868421	0.782609	0.72	0.66092	0.163043	0.305556	0.273148	0.0428135	0.178884	0.103417	0.056643		N
HS3ST4	rs4787342	Chr16:25889813	A	G	0.6875	0.868421	0.782609	0.72	0.658046	0.163043	0.305556	0.273148	0.0446215	0.181605	0.105844	0.058451		N
HS3ST4	rs556039501	Chr16:25892142	C	T	0.0625	0	0	0	0	0	0	0	0.185525	NA	NA	NA		N
HS3ST4	rs367713283	Chr16:25895602	G	A	0.03125	0.0789474	0.0217391	0.02	0	0	0	0	0.0936797	0.204285	0.0463476	0.0390491		N
HS3ST4	rs764915370	Chr16:25910781	G	A	0	0	0.0217391	0.08	0	0	0	0	NA	NA	0.0463476	0.17374		N
HS3ST4	rs113731316	Chr16:25912718	C	T	0	0.0789474	0.0217391	0.08	0.00287356	0	0	0	0	0.166373	0.0194882	0.145718		N
HS3ST4	rs72780801	Chr16:25912770	A	T	0.1875	0.368421	0.413043	0.34	0.281609	0.0217391	0.0277778	0.0694444	0.0100799	0.124483	0.151037	0.089196		N
HS3ST4	rs1596616730	Chr16:25927802	G	A	0	0.0263158	0.0869565	0	0	0	0	NA	NA	0.0676997	0.191445	NA		N
HS3ST4	rs186133355	Chr16:25930927	A	C	0.0625	0	0	0	0	0	0	0.00925926	0.185525	NA	NA	NA		N
HS3ST4	rs575885025	Chr16:25947344	A	G	1	1	0.913043	0.96	1	1	1	NA	NA	NA	0.197459	0.0875008		N
HS3ST4	rs57464987	Chr16:25951215	C	T	0.09375	0.105263	0.282609	0.18	0.0862069	0.0217391	0.416667	0.449074	0.0118783	0.0188998	0.2089	0.0796055		N
HS3ST4	rs6497901	Chr16:25951691	C	T	0.09375	0.105263	0.282609	0.18	0.0862069	0.0217391	0.416667	0.453704	0.0118783	0.0188998	0.2089	0.0796055		N
HS3ST4	rs6497902	Chr16:25951784	C	T	0.09375	0.105263	0.282609	0.18	0.0862069	0.0217391	0.416667	0.453704	0.0118783	0.0188998	0.2089	0.0796055		N
HS3ST4	rs7500724	Chr16:25952099	T	C	0.90625	0.894737	0.717391	0.82	0.913793	0.978261	0.583333	0.546296	0.0118783	0.0188998	0.2089	0.0796055		N
HS3ST4	rs7201879	Chr16:25952124	A	C	0.09375	0.105263	0.282609	0.18	0.0862069	0.0217391	0.25	0.314815	0.0118783	0.0188998	0.2089	0.0796055		N
HS3ST4	rs7202248	Chr16:25952228	C	T	0.09375	0.105263	0.282609	0.18	0.0862069	0.0217391	0.416667	0.449074	0.0118783	0.0188998	0.2089	0.0796055		N
HS3ST4	rs58895492	Chr16:25952291	C	T	0.90625	0.894737	0.717391	0.82	0.913793	0.978261	0.583333	0.550926	0.0118783	0.0188998	0.2089	0.0796055		N
HS3ST4	rs138363820	Chr16:25955308	G	A	0.0625	0.0789474	0.217391	0.16	0.00287356	0	0	0	0.137766	0.166373	0.392715	0.293664		N
HS3ST4	rs113302800	Chr16:25960071	G	A	0.1875	0.131579	0.326087	0.34	0.0862069	0.0217391	0.138889	0.125	0.0950801	0.034312	0.267387	0.280637		N
HS3ST4	rs147743652	Chr16:25961603	G	A	0.0625	0.0789474	0.217391	0.16	0.00287356	0	0	0	0.137766	0.166373	0.392715	0.293664		N
HS3ST4	rs4787789	Chr16:25963859	T	C	0.1875	0.131579	0.347826	0.34	0.0862069	0.0217391	0.25	0.208333	0.0950801	0.034312	0.295409	0.280637		N
HS3ST4	rs147287173	Chr16:25964462	C	T	0.0625	0.0789474	0.217391	0.16	0.00287356	0	0	0	0.137766	0.166373	0.392715	0.293664		N
HS3ST4	rs60949977	Chr16:25965098	G	T	0.1875	0.131579	0.347826	0.34	0.0862069	0	0.166667	0.189815	0.137296	0.0692103	0.319113	0.302743		N
HS3ST4	rs57191506	Chr16:25965121	T	C	0.1875	0.131579	0.347826	0.34	0.0862069	0	0.166667	0.189815	0.137296	0.0692103	0.319113	0.302743		N
HS3ST4	rs74013224	Chr16:25965487	G	T	0.1875	0.131579	0.347826	0.34	0.0862069	0	0.166667	0.189815	0.137296	0.0692103	0.319113	0.302743		N
HS3ST4	rs4073721	Chr16:25965771	C	T	0.1875	0.131579	0.369565	0.4	0.0948276	0.108696	0.166667	NA	0.0121495	0	0.218373	0.255044		N
HS3ST4	rs4073722	Chr16:25965905	C	T	0.1875	0.131579	0.347826	0.34	0.091954	0.0108696	0.111111	0.152778	0.107465	0.0465447	0.296784	0.281505		Y
HS3ST4	rs12446750	Chr16:25966055	A	G	0.1875	0.131579	0.347826	0.34	0.0862069	0	0.166667	0.189815	0.137296	0.0692103	0.319113	0.302743		N
HS3ST4	rs11074736	Chr16:25966744	A	G	0.1875	0.131579	0.369565	0.4	0.0948276	0.108696	0.166667	0.189815	0.0121495	0	0.218373	0.255044		N
HS3ST4	rs74013225	Chr16:25968112	G	T	0.1875	0.131579	0.347826	0.34	0.0862069	0	0.111111	NA	0.137296	0.0692103	0.319113	0.302743		Y
HS3ST4	rs74013226	Chr16:25968249	C	T	0.1875	0.131579	0.347826	0.34	0.0862069	0	0.166667	0.189815	0.137296	0.0692103	0.319113	0.302743		N
HS3ST4	rs56309205	Chr16:25968405	G	A	0.1875	0.131579	0.347826	0.34	0.0862069	0	0.166667	0.189815	0.137296	0.0692103	0.319113	0.302743		N
HS3ST4	rs9930733	Chr16:25974207	C	T	0.46875	0.342105	0.521739	0.68	0.373563	0.293478	0.0277778	0.0509259	0.0201458	-0.00305082	0.0578586	0.200895		N
HS3ST4	rs538044361	Chr16:26014312	A	G	0.0625	0	0	0	0	0	0	0	0.185525	NA	NA	NA		N
HS3ST4	rs145912256	Chr16:26020126	G	T	0.09375	0	0.0217391	0	0.00287356	0	0	0	0.219611	0	0.0194882	0		N
HS3ST4	rs77047941	Chr16:26027327	A	G	0	0.131579	0.0652174	0.04	0.0258621	0	0	0	-0.00494488	0.156961	0.0424784	0.0158269		N
HS3ST4	rs188447597	Chr16:26029596	A	G	0.03125	0	0.0217391	0.1	0	0	0	0	0.0936797	NA	0.0463476	0.21246		N
HS3ST4	rs187775288	Chr16:26034659	T	G	0.03125	0	0.0217391	0.12	0	0	0	NA	0.0936797	NA	0.0463476	0.245096		N
HS3ST4	rs62034509	Chr16:26036843	T	C	0.125	0.368421	0.369565	0.3	0.204023	0.0652174	0	0.0138889	-0.0252853	0.14217	0.137001	0.0688548		N
HS3ST4	rs62034510	Chr16:26037791	T	A	0.125	0.368421	0.369565	0.3	0.204023	0.0652174	0	0.00925926	-0.0252853	0.14217	0.137001	0.0688548		N
HS3ST4	rs146211516	Chr16:26038377	T	A	0	0.0526316	0.0434783	0.12	0.00574713	0	0	0	0	0.0783754	0.052518	0.19681		N
HS3ST4	rs527425639	Chr16:26045366	G	A	0	0.0526316	0.0217391	0.12	0.00287356	0	0	0	0	0.100544	0.0194882	0.216885		N
HS3ST4	rs72483415	Chr16:26049437	A	G	0.15625	0.342105	0.369565	0.28	0.204023	0.0543478	0.0833333	0.0601852	-0.0115853	0.125048	0.145769	0.0585142		N
HS3ST4	rs79038391	Chr16:26051373	T	C	0	0.105263	0.173913	0.04	0.0402299	0	0	0	-0.00654604	0.0836107	0.173347	0.0110794		N
HS3ST4	rs1211074052	Chr16:26069828	T	C	0.03125	0.0526316	0.173913	0	0	0	0	NA	0.0936797	0.14056	0.347685	NA		N
HS3ST4	rs1022319419	Chr16:26075157	C	T	0.03125	0.0526316	0.173913	0	0	0	0	NA	0.0936797	0.14056	0.347685	NA		N
HS3ST4	rs538323373	Chr16:26079218	C	T	0.0625	0	0.0434783	0	0	0	0	0	0.185525	NA	0.101408	NA		N
HS3ST4	rs79896955	Chr16:26089602	C	T	0.125	0.184211	0.0869565	0.1	0.0373563	0	0	0	0.126572	0.213526	0.0556741	0.0700009		N
HS3ST4	rs78777430	Chr16:26103958	A	G	0.0625	0.0789474	0.173913	0.04	0.0402299	0	0	0	0.0387133	0.0486463	0.173347	0.0110794		N
HS3ST4	rs768921731	Chr16:26113815	G	A	0	0.0789474	0	0	0	0	0	NA	NA	0.204285	NA	NA		N
HS3ST4	rs1011681042	Chr16:26123485	G	T	0	0.0263158	0.0217391	0.08	0	0	0	NA	NA	0.0676997	0.0463476	0.17374		N
HS3ST4	rs1043124569	Chr16:26123486	A	T	0	0.0263158	0.0217391	0.08	0	0	0	NA	NA	0.0676997	0.0463476	0.17374		N
HS3ST4	rs117785863	Chr16:26134976	A	G	0.09375	0	0.0217391	0.06	0.00862069	0	0	0	0.16729	0	0.00819935	0.071444		N
a SNPs with LSBL values within the top 0.1% and 1% threshold in the whole genome level as extremely highly differentiated (red) and highly differentiated SNPs (blue), respectively.
b SNPs as archaic informative variants in these populations.

## Sheet: Table S6
Table S6. Putative adaptive variants within newly identified CAR genes.
Gene	SNP rsID	Position (GRCh38)	Ancestral Allele	Derived Allele	DAF								LSBL (X-HAN-French) a				Archaic Informative Variant b	eQTL	CADD_PHRED>15 c
					DAU	EVK	ORQ	YAK	HAN	French	Yoruba	YRI (1KG)	DAU	EVK	ORQ	YAK
FGGY	rs534436226	Chr1:59299693	A	C	0	0.0263158	0.108696	0.08	0	0	0	NA	NA	0.0676997	0.239854	0.17374		N	N
FGGY	rs35786859	Chr1:59300111	T	A	0.1875	0.315789	0.26087	0.44	0.103448	0.0978261	0	0	0.015387	0.153976	0.0902586	0.305403		Y	N
FGGY	rs12567231	Chr1:59311048	A	G	0.1875	0.315789	0.26087	0.44	0.103448	0.119565	0.0555556	0.0972222	0.00896305	0.135645	0.0759715	0.285035		Y	N
FGGY	rs12568514	Chr1:59314066	C	T	0.21875	0.315789	0.282609	0.5	0.146552	0.119565	0.0833333	0.171296	0.00943318	0.0945469	0.063561	0.303898		Y	N
FGGY	rs12562718	Chr1:59320538	C	T	0.1875	0.315789	0.26087	0.44	0.103448	0.119565	0.0555556	0.0972222	0.00896305	0.135645	0.0759715	0.285035		Y	N
FGGY	rs77224816	Chr1:59324649	G	T	0.0625	0.0526316	0.0217391	0	0	0	0	0	0.185525	0.14056	0.0463476	NA		N	N
FGGY	rs12567497	Chr1:59325856	T	C	0.1875	0.315789	0.26087	0.44	0.100575	0.119565	0.0833333	0.101852	0.0105167	0.139145	0.0786982	0.289001		Y	N
FGGY	rs17480463	Chr1:59326298	T	G	0.1875	0.315789	0.26087	0.44	0.100575	0.119565	0.0833333	0.101852	0.0105167	0.139145	0.0786982	0.289001		Y	N
FGGY	rs71646034	Chr1:59326722	G	A	0.1875	0.315789	0.26087	0.44	0.100575	0.119565	0.0833333	NA	0.0105167	0.139145	0.0786982	0.289001		N	N
FGGY	rs12561880	Chr1:59330115	A	G	0.1875	0.315789	0.26087	0.44	0.0977011	0.119565	0.0833333	0.101852	0.0121756	0.142765	0.0815407	0.293048		Y	N
FGGY	rs835377	Chr1:59331134	G	C	0.1875	0.315789	0.26087	0.44	0.0977011	0.119565	0.138889	0.231481	0.0121756	0.142765	0.0815407	0.293048		Y	N
FGGY	rs12567968	Chr1:59333162	T	G	0.1875	0.315789	0.26087	0.42	0.0948276	0	0	NA	0.132396	0.281564	0.198573	0.38812		N	N
FGGY	rs1167499489	Chr1:59335271	C	A	0	0.105263	0	0	0	0	0	NA	NA	0.260813	NA	NA		N	N
FGGY	rs835387	Chr1:59336146	G	C	0.1875	0.315789	0.26087	0.44	0.0977011	0.108696	0.138889	0.277778	0.0138098	0.151492	0.0882551	0.302976		Y	N
FGGY	rs34778870	Chr1:59336726	G	A	0.1875	0.315789	0.26087	0.44	0.0977011	0.108696	0.0833333	0.101852	0.0138098	0.151492	0.0882551	0.302976		Y	N
FGGY	rs35620078	Chr1:59336859	A	G	0.1875	0.315789	0.26087	0.44	0.0977011	0.108696	0.0833333	0.101852	0.0138098	0.151492	0.0882551	0.302976		Y	N
FGGY	rs17480876	Chr1:59340673	A	G	0.1875	0.315789	0.26087	0.44	0.0977011	0.108696	0.0277778	0.0138889	0.0138098	0.151492	0.0882551	0.302976		Y	N
FGGY	rs1305919944	Chr1:59342134	T	C	0	0.105263	0	0	0	0	0	NA	NA	0.260813	NA	NA		N	N
FGGY	rs34400243	Chr1:59343310	A	G	0.1875	0.315789	0.26087	0.44	0.0977011	0.108696	0.0833333	0.101852	0.0138098	0.151492	0.0882551	0.302976		Y	N
FGGY	rs150686724	Chr1:59343322	G	A	0	0.210526	0.23913	0.34	0.0114943	0	0	0	-0.000247258	0.362621	0.38074	0.499838		N	N
FGGY	rs835354	Chr1:59343950	C	T	0.1875	0.315789	0.282609	0.44	0.100575	0.108696	0.222222	0.407407	0.0121509	0.147871	0.108334	0.298929		Y	N
FGGY	rs835356	Chr1:59346621	A	G	0.21875	0.315789	0.304348	0.5	0.146552	0.108696	0.222222	0.449074	0.0151976	0.103519	0.0913972	0.314217		Y	N
FGGY	rs835362	Chr1:59348208	A	G	0.75	0.684211	0.695652	0.5	0.853448	0.891304	0.638889	0.435185	0.0379451	0.103519	0.0913972	0.314217		Y	N
FGGY	rs11207439	Chr1:59352187	G	A	0.1875	0.315789	0.26087	0.44	0.0977011	0.108696	0.0833333	0.101852	0.0138098	0.151492	0.0882551	0.302976		Y	Y (18.54)
FGGY	rs77071359	Chr1:59352511	C	T	0.1875	0.315789	0.26087	0.44	0.0977011	0.108696	0.0833333	0.101852	0.0138098	0.151492	0.0882551	0.302976		Y	N
FGGY	rs553692694	Chr1:59359383	A	G	0.0625	0	0	0	0	0	0	0	0.185525	NA	NA	NA		N	N
FGGY	rs74697132	Chr1:59364256	C	T	0.15625	0.289474	0.26087	0.42	0.0948276	0	0	0	0.0958756	0.24718	0.198573	0.38812		N	Y (19.72)
FGGY	rs17540601	Chr1:59366817	C	T	0.21875	0.368421	0.282609	0.44	0.0977011	0.108696	0.0555556	0.0185185	0.0394953	0.217909	0.11253	0.302976		Y	N
FGGY	rs531699873	Chr1:59377545	A	G	0.03125	0	0.0217391	0.12	0	0	0	0	0.0936797	NA	0.0463476	0.248735		N	N
FGGY	rs6697879	Chr1:59386059	C	T	0.125	0.315789	0.326087	0.4	0.066092	0.0543478	0.111111	0.148148	0.00806531	0.261379	0.266312	0.361612		N	N
FGGY	rs61313182	Chr1:59387690	A	G	0.84375	0.684211	0.695652	0.58	0.925287	0.913043	0.611111	0.611111	0.0134897	0.207468	0.186646	0.335016		N	N
FGGY	rs76402341	Chr1:59389343	A	C	0.125	0.289474	0.282609	0.38	0.0603448	0	0	0	0.0885486	0.314819	0.286991	0.407887		N	N
FGGY	rs6662442	Chr1:59389503	C	T	0.15625	0.315789	0.326087	0.42	0.0804598	0.0869565	0.388889	0.388889	0.00964615	0.19805	0.205319	0.325536		N	N
FGGY	rs12566469	Chr1:59390366	G	A	0.09375	0.289474	0.282609	0.38	0.0603448	0	0	0	0.0592203	0.314819	0.286991	0.407887		N	N
FGGY	rs76944681	Chr1:59396632	A	G	0.09375	0.263158	0.152174	0.28	0.0545977	0	0	0	0.0546775	0.290114	0.117589	0.288625		N	N
FGGY	rs118015657	Chr1:59398652	A	G	0.09375	0.263158	0.152174	0.28	0.0545977	0	0	0	0.0546775	0.290114	0.117589	0.288625		N	N
FGGY	rs55936053	Chr1:59400693	A	G	0.09375	0.263158	0.173913	0.28	0.0574713	0	0.0277778	0.0277778	0.0537117	0.283329	0.139994	0.28213		N	N
FGGY	rs74603005	Chr1:59407543	A	T	0.09375	0.263158	0.152174	0.28	0.0545977	0	0	0	0.0546775	0.290114	0.117589	0.288625		N	N
FGGY	rs77213855	Chr1:59407801	T	C	0.09375	0.263158	0.152174	0.28	0.0545977	0	0	0	0.0546775	0.290114	0.117589	0.288625		N	Y (16.58)
FGGY	rs969759326	Chr1:59407816	G	A	0.0625	0	0	0	0	0	0	NA	0.185525	NA	NA	NA		N	N
FGGY	rs143459656	Chr1:59408831	C	T	0.0625	0	0	0	0	0	0	0	0.185525	NA	NA	NA		N	N
FGGY	rs17119433	Chr1:59412103	G	A	0.125	0.289474	0.173913	0.32	0.0747126	0.0869565	0.25	0.365741	0.000233173	0.171573	0.0331822	0.205188		N	N
FGGY	rs74718458	Chr1:59419086	T	C	0.09375	0.289474	0.173913	0.26	0.0545977	0.0543478	0.0555556	0.0740741	0	0.246094	0.0768071	0.19305		N	N
FGGY	rs79353853	Chr1:59422282	G	A	0.09375	0.263158	0.152174	0.24	0.0545977	0	0	0	0.0546775	0.290114	0.117589	0.232486		N	N
FGGY	rs80178854	Chr1:59422566	G	A	0.125	0.263158	0.152174	0.24	0.0574713	0	0.0277778	0.0277778	0.0916625	0.283329	0.11346	0.22644		N	N
FGGY	rs12561815	Chr1:59422766	G	A	0.09375	0.263158	0.152174	0.24	0.0545977	0	0	0	0.0546775	0.290114	0.117589	0.232486		N	N
FGGY	rs187751573	Chr1:59424359	C	G	0.09375	0.0789474	0.152174	0.08	0.00862069	0	0	0	0.16729	0.122237	0.254202	0.110244		N	N
FGGY	rs1220388003	Chr1:59425948	C	T	0	0.105263	0	0	0	0	0	NA	NA	0.260813	NA	NA		N	N
FGGY	rs1199296688	Chr1:59430877	A	G	0	0.105263	0	0	0	0	0	NA	NA	0.260813	NA	NA		N	N
FGGY	rs539439355	Chr1:59436019	G	A	0	0.131579	0.0217391	0.02	0	0	0	NA	NA	0.31155	0.0463476	0.0390491		N	N
FGGY	rs570198537	Chr1:59458740	G	A	0	0.0263158	0.0434783	0.08	0	0	0	NA	NA	0.0676997	0.101408	0.17374		N	N
FGGY	rs78545665	Chr1:59477452	G	A	0	0	0.0869565	0	0	0	0	0.00925926	NA	NA	0.197459	NA		N	N
FGGY	rs554169163	Chr1:59478668	A	T	0.0625	0	0	0	0	0	0	0	0.185525	NA	NA	NA		N	N
FGGY	rs1427020098	Chr1:59485472	G	A	0	0.105263	0	0	0	0	0	NA	NA	0.260813	NA	NA		N	N
FGGY	rs143147660	Chr1:59498352	C	A	0.0625	0.0526316	0.0869565	0.12	0.00287356	0	0	0	0.137766	0.100544	0.167349	0.22402		N	N
FGGY	rs189950023	Chr1:59501551	G	T	0.0625	0	0	0	0	0	0	0	0.185525	NA	NA	NA		N	N
FGGY	rs1198899087	Chr1:59512520	T	C	0.0625	0	0	0	0	0	0	NA	0.185525	NA	NA	NA		N	N
FGGY	rs76988708	Chr1:59531708	G	A	0.125	0.0526316	0	0.06	0.00287356	0	0.194444	0.138889	0.291248	0.100544	0	0.103136		N	N
FGGY	rs60666199	Chr1:59539639	T	A	0.125	0.0526316	0	0.06	0.00287356	0	0	0	0.291248	0.100544	0	0.103136		N	N
FGGY	rs76448458	Chr1:59540370	A	G	0.125	0.0526316	0	0.06	0.00287356	0	0.305556	0.189815	0.291248	0.100544	0	0.103136		N	N
FGGY	rs11811767	Chr1:59547228	G	A	0.125	0.0526316	0	0.06	0.00287356	0	0.305556	0.189815	0.291248	0.100544	0	0.103136		N	N
FGGY	rs11801055	Chr1:59547779	T	C	0.125	0.0526316	0	0.06	0.00287356	0	0.305556	0.189815	0.291248	0.100544	0	0.103136		N	N
FGGY	rs76274856	Chr1:59553653	G	A	0.125	0.0526316	0	0.06	0.00287356	0	0.305556	NA	0.291248	0.100544	0	0.103136		N	N
FGGY	rs41287702	Chr1:59553764	C	G	0.125	0.0526316	0	0.06	0.00287356	0	0.333333	0.194444	0.291248	0.100544	0	0.103136		N	N
FGGY	rs2272052	Chr1:59554110	T	C	0.125	0.0526316	0	0.06	0.00287356	0	0.305556	0.189815	0.291248	0.100544	0	0.103136		N	Y (17.44)
FGGY	rs59394162	Chr1:59555001	C	T	0.125	0.0526316	0	0.06	0.00287356	0	0.0833333	0.0787037	0.291248	0.100544	0	0.103136		N	N
FGGY	rs148250951	Chr1:59555637	T	G	0.09375	0	0	0	0.00574713	0	0	0	0.189529	0	0	0		N	N
FGGY	rs138836617	Chr1:59558499	G	A	0.03125	0.105263	0.0652174	0.1	0.0114943	0	0	0	0.0193449	0.163573	0.0736037	0.135516		N	N
FGGY	rs56071323	Chr1:59560794	G	C	0.125	0.0526316	0	0.06	0.00287356	0	0.333333	0.222222	0.291248	0.100544	0	0.103136		N	N
FGGY	rs17119620	Chr1:59561487	A	G	0.125	0.0526316	0	0.06	0.00287356	0	0.305556	0.189815	0.291248	0.100544	0	0.103136		N	N
FGGY	rs113429306	Chr1:59565446	G	A	0.125	0.0526316	0	0.06	0.00287356	0	0.333333	0.222222	0.291248	0.100544	0	0.103136		N	N
FGGY	rs72917771	Chr1:59565573	C	T	0.125	0.0526316	0	0.06	0.00287356	0	0.361111	0.236111	0.291248	0.100544	0	0.103136		N	N
FGGY	rs77275312	Chr1:59566341	G	A	0.125	0.0526316	0	0.06	0.00287356	0	0.0833333	0.0694444	0.291248	0.100544	0	0.103136		N	N
FGGY	rs11207477	Chr1:59568376	G	A	0.125	0.0526316	0	0.06	0.00287356	0	0.333333	0.305556	0.291248	0.100544	0	0.103136		N	N
FGGY	rs17119633	Chr1:59573960	C	T	0.125	0.0526316	0	0.06	0.00287356	0.0108696	0.416667	0.37963	0.258041	0.0753128	-9.704e-05	0.0825885		N	N
FGGY	rs12071725	Chr1:59574301	C	T	0.875	0.947368	1	0.94	0.997126	0.98913	0.583333	0.62037	0.258041	0.0753128	-9.704e-05	0.0825885		N	N
FGGY	rs58917772	Chr1:59575968	C	A	0.125	0.0526316	0	0.06	0.00287356	0	0.166667	0.134259	0.291248	0.100544	0	0.103136		N	N
FGGY	rs11806220	Chr1:59576499	A	G	0.125	0.0526316	0	0.06	0.00287356	0	0.333333	0.208333	0.291248	0.100544	0	0.103136		Y	N
FGGY	rs116147570	Chr1:59576892	C	T	0.09375	0.0526316	0	0.06	0.00287356	0	0.0833333	0.0787037	0.219611	0.100544	0	0.103136		N	N
FGGY	rs11805572	Chr1:59578285	T	C	0.125	0.0526316	0	0.06	0.00287356	0	0.333333	0.212963	0.291248	0.100544	0	0.103136		N	N
FGGY	rs138441896	Chr1:59580611	T	C	0.90625	0.973684	1	1	0.997126	1	1	1	0.219611	0.0320221	0	0		N	N
FGGY	rs144039814	Chr1:59586829	A	T	0.125	0.0526316	0	0.06	0.00287356	0	0.166667	0.125	0.291248	0.100544	0	0.103136		N	N
FGGY	rs58502081	Chr1:59592977	G	T	0.09375	0.0526316	0	0.06	0.00287356	0	0.166667	0.125	0.219611	0.100544	0	0.103136		N	N
FGGY	rs116421204	Chr1:59594045	A	T	0.125	0.0526316	0	0.06	0.00287356	0	0.166667	0.125	0.291248	0.100544	0	0.103136		N	N
FGGY	rs78421629	Chr1:59594437	T	C	0.875	0.947368	1	0.94	0.997126	1	0.833333	0.875	0.291248	0.100544	0	0.103136		N	N
FGGY	rs75584541	Chr1:59594939	G	A	0.125	0.0526316	0	0.06	0.00287356	0	0.166667	0.125	0.291248	0.100544	0	0.103136		N	N
FGGY	rs74616455	Chr1:59596578	C	T	0.125	0.0789474	0	0.06	0.00287356	0	0.166667	0.125	0.291248	0.166373	0	0.103136		N	N
FGGY	rs78399109	Chr1:59596625	G	C	0.125	0.0789474	0	0.06	0.00287356	0	0.166667	0.125	0.291248	0.166373	0	0.103136		N	N
FGGY	rs557887107	Chr1:59598079	G	A	0.0625	0	0	0	0	0	0	0	0.185525	NA	NA	NA		N	N
FGGY	rs75146082	Chr1:59598083	T	C	0.125	0.0789474	0	0.06	0.00287356	0	0.166667	0.125	0.291248	0.166373	0	0.103136		N	N
FGGY	rs72919607	Chr1:59600175	G	A	0.125	0.0789474	0	0.06	0.00287356	0.0434783	0.194444	0.175926	0.175228	0.0780051	-0.0231836	0.0364261		Y	N
FGGY	rs72919608	Chr1:59600440	T	G	0.125	0.0789474	0	0.06	0.00287356	0.0434783	0.194444	0.175926	0.175228	0.0780051	-0.0231836	0.0364261		Y	N
FGGY	rs72919609	Chr1:59600457	A	G	0.125	0.0789474	0	0.06	0.00287356	0.0434783	0.194444	0.175926	0.175228	0.0780051	-0.0231836	0.0364261		Y	N
FGGY	rs72919610	Chr1:59600666	T	A	0.125	0.0789474	0	0.06	0.00287356	0.0434783	0.194444	0.175926	0.175228	0.0780051	-0.0231836	0.0364261		Y	N
FGGY	rs72919615	Chr1:59601418	A	G	0.125	0.0789474	0	0.06	0.00287356	0.0434783	0.194444	0.175926	0.175228	0.0780051	-0.0231836	0.0364261		Y	N
FGGY	rs72919617	Chr1:59601820	A	C	0.125	0.0789474	0	0.06	0.00287356	0.0434783	0.194444	NA	0.175228	0.0780051	-0.0231836	0.0364261		Y	N
FGGY	rs139686842	Chr1:59605040	G	A	0	0.131579	0	0	0.0201149	0	0	0	-0.00305989	0.176733	-0.00305989	-0.00284958		N	N
FGGY	rs139093334	Chr1:59615400	A	T	0.125	0.0789474	0	0.06	0.00287356	0	0.0833333	0.0601852	0.291248	0.166373	0	0.103136		N	N
FGGY	rs57687339	Chr1:59618418	A	G	0.125	0.0789474	0	0.06	0.00287356	0	0.0833333	0.0925926	0.291248	0.166373	0	0.103136		N	N
FGGY	rs72919618	Chr1:59621920	A	G	0.125	0.0789474	0	0.06	0.00287356	0	0.0833333	0.0925926	0.291248	0.166373	0	0.103136		N	N
FGGY	rs75846136	Chr1:59622996	A	G	0.09375	0.0789474	0	0.06	0.00287356	0	0.0833333	0.0601852	0.219611	0.166373	0	0.103136		N	N
FGGY	rs138021139	Chr1:59626816	C	T	0.125	0.0789474	0	0.06	0.00287356	0	0	0.00925926	0.291248	0.166373	0	0.103136		N	N
FGGY	rs146931495	Chr1:59631047	A	G	0.03125	0.0263158	0.0217391	0.1	0	0	0	0	0.0936797	0.0676997	0.0463476	0.21246		N	N
FGGY	rs55744921	Chr1:59632622	C	T	0.125	0.0789474	0	0.06	0.00287356	0	0.0833333	0.0925926	0.291248	0.166373	0	0.103136		N	N
FGGY	rs117391531	Chr1:59633301	C	T	0.125	0.0789474	0	0.06	0.00287356	0	0	0	0.291248	0.166373	0	0.103136		N	N
FGGY	rs909243897	Chr1:59634440	A	G	0.0625	0.0263158	0	0	0	0	0	NA	0.185525	0.0676997	NA	NA		N	N
FGGY	rs72919632	Chr1:59643930	G	A	0.15625	0.105263	0.0217391	0.1	0.00574713	0	0.0833333	0.0925926	0.327408	0.200433	0.010521	0.165469		N	N
FGGY	rs77983716	Chr1:59645050	G	A	0.15625	0.105263	0.0217391	0.1	0.00574713	0	0	0.00925926	0.327408	0.200433	0.010521	0.165469		N	N
FGGY	rs55889022	Chr1:59647510	T	A	0.15625	0.105263	0.0217391	0.1	0.00574713	0	0.0833333	0.0925926	0.327408	0.200433	0.010521	0.165469		N	N
FGGY	rs1005307853	Chr1:59647693	G	A	0.0625	0.0526316	0.0217391	0.02	0	0	0	NA	0.185525	0.14056	0.0463476	0.0390491		N	N
FGGY	rs144002610	Chr1:59660483	C	A	0.0625	0	0	0	0	0	0	0	0.185525	NA	NA	NA		N	N
FGGY	rs955282088	Chr1:59663495	A	G	0.0625	0.0263158	0	0	0	0	0	NA	0.185525	0.0676997	NA	NA		N	N
FGGY	rs72919653	Chr1:59673316	G	A	0.15625	0.105263	0.0217391	0.1	0.00862069	0	0.0833333	0.0925926	0.304912	0.180098	0.00819935	0.149086		N	N
FGGY	rs78523606	Chr1:59675430	A	G	0.15625	0.105263	0.0217391	0.1	0.00862069	0	0.0833333	0.0601852	0.304912	0.180098	0.00819935	0.149086		N	N
FGGY	rs56803335	Chr1:59679691	A	G	0.15625	0.105263	0.0217391	0.1	0.00862069	0	0.0833333	0.0972222	0.304912	0.180098	0.00819935	0.149086		N	N
FGGY	rs117040441	Chr1:59686151	T	G	0.03125	0.0526316	0.0217391	0.1	0.00287356	0	0	0	0.0481446	0.100544	0.0194882	0.186022		N	N
FGGY	rs188980589	Chr1:59686163	G	C	0.03125	0.0526316	0.0217391	0.1	0.00287356	0	0	0	0.0481446	0.100544	0.0194882	0.186022		N	N
FGGY	rs546444468	Chr1:59689072	G	A	0.0625	0	0	0	0	0	0	0	0.185525	NA	NA	NA		N	N
FGGY	rs1573375935	Chr1:59697501	T	C	0	0	0.0869565	0	0	0	0	NA	NA	NA	0.197459	NA		N	N
FGGY	rs368895645	Chr1:59707402	G	C	0	0.105263	0	0	0	0	0	0	NA	0.260813	NA	NA		N	N
FGGY	rs4916073	Chr1:59709925	G	A	0.09375	0	0	0	0.00862069	0	0	0	0.16729	0	0	0		N	N
FGGY	rs10889155	Chr1:59717539	G	A	0.46875	0.842105	0.543478	0.6	0.632184	0.402174	0.388889	0.263889	-0.0290813	0.142862	-0.0348896	-0.0170764		N	N
FGGY	rs1042700829	Chr1:59718413	G	A	0.0625	0	0	0	0	0	0	NA	0.185525	NA	NA	NA		N	N
FGGY	rs76374599	Chr1:59729347	T	C	0.15625	0.184211	0.195652	0.34	0.123563	0.076087	0	0.0138889	0.00684805	0.0203498	0.0286883	0.178387		N	N
FGGY	rs200060237	Chr1:59734039	G	A	0.03125	0.105263	0.0652174	0.02	0	0	0	0	0.0936797	0.254468	0.151516	0.0390491		N	N
FGGY	rs1207938	Chr1:59744346	A	G	0.71875	0.631579	0.565217	0.74	0.827586	0.891304	0.861111	0.898148	0.0536588	0.137564	0.210732	0.0340436		Y	N
FGGY	rs1207937	Chr1:59745315	A	T	0.71875	0.605263	0.521739	0.7	0.784483	0.891304	0.861111	0.898148	0.0314972	0.127312	0.214727	0.0399877		Y	N
FGGY	rs1207935	Chr1:59745794	T	C	0.84375	0.736842	0.652174	0.92	0.890805	0.98913	0.416667	0.486111	0.0677117	0.176559	0.268505	0.0012711		N	N
FGGY	rs79308880	Chr1:59745870	A	G	0.09375	0.184211	0.152174	0.04	0.0718391	0	0	0	0.0556099	0.143996	0.0959467	0.00073715		N	N
FGGY	rs76808095	Chr1:59747207	G	C	0.8125	0.657895	0.586957	0.86	0.847701	0.923913	0.861111	0.930556	0.0139645	0.153604	0.230786	-0.00466572		N	N
FGGY	rs75591270	Chr1:59747343	C	G	0.15625	0.263158	0.347826	0.08	0.112069	0	0	0	0.0918623	0.190281	0.276003	0.0145299		N	N
FGGY	rs74956309	Chr1:59747348	G	C	0.15625	0.263158	0.347826	0.08	0.109195	0	0	0	0.0928732	0.193795	0.280366	0.0155409		N	N
FGGY	rs575150676	Chr1:59748574	T	C	0	0.131579	0.0217391	0.02	0	0	0	NA	NA	0.31155	0.0463476	0.0390491		N	N
FGGY	rs12406728	Chr1:59749423	T	C	0.8125	0.657895	0.586957	0.86	0.847701	0.934783	0.861111	0.925926	0.0191243	0.162865	0.239416	-0.00332995		N	N
FGGY	rs10489423	Chr1:59750274	C	T	0.15625	0.263158	0.347826	0.08	0.112069	0.0108696	0.111111	0.0740741	0.0667099	0.173055	0.264151	0.00026925		N	N
FGGY	rs74652035	Chr1:59750519	C	G	0.15625	0.263158	0.347826	0.08	0.112069	0.0108696	0.138889	0.0740741	0.0667099	0.173055	0.264151	0.00026925		N	N
FGGY	rs6666842	Chr1:59752371	C	G	0.1875	0.315789	0.413043	0.16	0.218391	0.0434783	0.277778	0.25463	0.0111401	0.0977686	0.184946	-0.00970864		N	N
FGGY	rs1350056216	Chr1:59754226	G	C	0.09375	0.0263158	0.0217391	0.02	0.00287356	0	0	NA	0.219611	0.0320221	0.0194882	0.0153775		N	N
FGGY	rs11578221	Chr1:59754237	T	C	0.15625	0.236842	0.326087	0.08	0.106322	0.0108696	0.166667	0.0833333	0.0687108	0.14927	0.246504	0.0022702		N	N
FGGY	rs11584318	Chr1:59754345	T	C	0.8125	0.631579	0.630435	0.78	0.885057	0.98913	0.805556	0.921296	0.094307	0.300691	0.287866	0.104871		N	N
FGGY	rs11580484	Chr1:59754566	A	G	0.1875	0.368421	0.369565	0.22	0.117816	0.0108696	0.166667	0.0833333	0.0921814	0.296256	0.283529	0.10227		N	N
ADH1A	rs28364333	Chr4:99278996	C	T	0.375	0.421053	0.478261	0.42	0.0718391	0.119565	0.111111	0.194444	0.260368	0.314346	0.378075	0.303764		Y	N
ADH1A	rs12504321	Chr4:99281548	G	T	0.375	0.421053	0.478261	0.42	0.0718391	0.119565	0.111111	0.194444	0.260368	0.314346	0.378075	0.303764		Y	N
ADH1A	rs12504365	Chr4:99281880	C	T	0.375	0.421053	0.478261	0.42	0.0718391	0.119565	0.111111	0.194444	0.260368	0.314346	0.378075	0.303764		Y	N
ADH1A	rs12512053	Chr4:99281999	A	G	0.375	0.421053	0.478261	0.42	0.0718391	0.108696	0.0555556	0.0694444	0.273838	0.32791	0.391426	0.316468		Y	N
ADH1A	rs12508502	Chr4:99282019	T	C	0.375	0.421053	0.478261	0.42	0.0718391	0.108696	0.0555556	0.0694444	0.273838	0.32791	0.391426	0.316468		Y	N
ADH1A	rs2276332	Chr4:99282290	A	C	0.375	0.421053	0.478261	0.42	0.0718391	0.108696	0.0555556	0.0694444	0.273838	0.32791	0.391426	0.316468		Y	N
ADH1A	rs28364304	Chr4:99285755	T	C	0.375	0.421053	0.478261	0.42	0.0718391	0.119565	0.111111	0.194444	0.260368	0.314346	0.378075	0.303764		Y	N
ADH1A	rs3805325	Chr4:99290242	T	C	0.375	0.421053	0.478261	0.42	0.0718391	0.119565	0.111111	0.194444	0.260368	0.314346	0.378075	0.303764		Y	N
ADH1A-ADH1B	rs72679893	Chr4:99294430	C	T	0.375	0.447368	0.478261	0.42	0.0689655	0.119565	0.277778	0.296296	0.264831	0.352029	0.381896	0.307654		Y	N
ADH1A-ADH1B	rs12505816	Chr4:99298425	G	A	0.375	0.447368	0.478261	0.42	0.0689655	0.108696	0.0555556	0.0740741	0.278558	0.366082	0.395504	0.320615		Y	N
ADH1A-ADH1B	rs148953544	Chr4:99300789	G	A	0.09375	0.105263	0.130435	0.04	0.0172414	0	0	0	0.123399	0.137322	0.172707	0.0198165		N	N
ADH1A-ADH1B	rs111797757	Chr4:99302800	A	C	0.375	0.447368	0.478261	0.42	0.0718391	0.119565	0.277778	0.314815	0.260368	0.347874	0.378075	0.303764		Y	N
ADH1A-ADH1B	rs56948765	Chr4:99304179	G	A	0.375	0.447368	0.478261	0.42	0.0689655	0.119565	0.277778	0.319444	0.264831	0.352029	0.381896	0.307654		Y	N
ADH1B	rs1345467710	Chr4:99305666	G	T	0	0.0526316	0	0	0	0	0	NA	NA	0.14056	NA	NA		N	N
ADH1B	rs28914794	Chr4:99306131	G	C	0.375	0.447368	0.478261	0.42	0.0689655	0.119565	0.277778	NA	0.264831	0.352029	0.381896	0.307654		Y	N
ADH1B	rs17033	Chr4:99307788	T	C	0.375	0.447368	0.478261	0.42	0.0718391	0.108696	0.0555556	0.0740741	0.273838	0.36167	0.391426	0.316468		Y	N
ADH1B	rs1733760193	Chr4:99311752	A	C	0	0.0526316	0	0	0	0	0	NA	NA	0.14056	NA	NA		N	N
ADH1B	rs28914775	Chr4:99311969	C	T	0.375	0.447368	0.478261	0.42	0.0718391	0.108696	0.0555556	0.0740741	0.273838	0.36167	0.391426	0.316468		Y	N
ADH1B	rs28914770	Chr4:99312735	C	T	0.375	0.447368	0.478261	0.42	0.0718391	0.119565	0.277778	0.319444	0.260368	0.347874	0.378075	0.303764		Y	N
ADH1B	rs1269411559	Chr4:99320961	A	G	0	0.0526316	0	0	0	0	0	NA	NA	0.14056	NA	NA		N	N
NELL1	rs190948690	Chr11:20676717	G	C	0.125	0	0.0217391	0	0.00574713	0	0	0	0.262309	0	0.010521	0		N	N
NELL1	rs550994769	Chr11:20686479	G	A	0	0.0526316	0.0217391	0	0	0	0	0	NA	0.14056	0.0463476	NA		N	N
NELL1	rs143768497	Chr11:20695005	C	G	0.125	0	0.0217391	0	0.00574713	0	0	0	0.262309	0	0.010521	0	DAU	N	N
NELL1	rs147754648	Chr11:20711980	G	C	0.03125	0.0789474	0.0217391	0.02	0.00287356	0	0	0	0.0481446	0.166373	0.0194882	0.0153775	DAU,YAK	N	N
NELL1	rs145430708	Chr11:20733105	A	G	0	0.0263158	0.0434783	0.14	0.00862069	0	0	0	0	0.0135899	0.0421299	0.223592		N	N
NELL1	rs144788659	Chr11:20750179	C	T	0.125	0	0.0217391	0	0.00574713	0	0	0	0.262309	0	0.010521	0		N	N
NELL1	rs1046069887	Chr11:20752585	T	G	0.0625	0	0.0217391	0	0	0	0	NA	0.185525	NA	0.0463476	NA		N	N
NELL1	rs557606166	Chr11:20766749	T	G	0	0	0.0652174	0	0	0	0	0	NA	NA	0.151516	NA		N	N
NELL1	rs549321747	Chr11:20786809	C	T	0.03125	0.0263158	0.0217391	0.08	0	0	0	NA	0.0936797	0.0676997	0.0463476	0.17374		N	N
NELL1	rs946406479	Chr11:20786867	G	T	0	0.0789474	0.0217391	0.02	0.00574713	0	0	0	0	0.140689	0.010521	0.00761651		N	N
NELL1	rs1168545532	Chr11:20793693	T	C	0.0625	0	0	0	0	0	0	NA	0.185525	NA	NA	NA		N	N
NELL1	rs443592	Chr11:20814754	A	C	0.0625	0.105263	0.108696	0.3	0.0517241	0.0434783	0.0277778	0.0787037	0	0.01409	0.0185795	0.269249		N	N
NELL1	rs16906842	Chr11:20822345	G	A	0.03125	0.0263158	0.0869565	0.22	0.0229885	0.0543478	0	0.0740741	-0.00520405	-0.00520405	0.022273	0.210571		N	N
NELL1	rs327022	Chr11:20823330	G	C	0.0625	0.0789474	0.0869565	0.32	0.0344828	0.076087	0.194444	0.365741	-0.00712635	-0.00097735	0.00443515	0.293308		N	N
NELL1	rs72942539	Chr11:20823786	A	C	0.03125	0.0789474	0.0869565	0.32	0.0344828	0.0543478	0	0.0740741	0	0.006149	0.0115615	0.324381		Y	N
NELL1	rs192653032	Chr11:20824320	A	C	0.03125	0.0263158	0.0217391	0.1	0.00287356	0	0	0	0.0481446	0.0320221	0.0194882	0.186022		N	N
NELL1	rs327020	Chr11:20824395	G	A	0.9375	0.921053	0.913043	0.68	0.965517	0.902174	0.777778	0.615741	-0.0183752	-0.0122262	-0.0068137	0.261751		N	N
NELL1	rs431711	Chr11:20825397	A	T	0.0625	0.0789474	0.0869565	0.32	0.0344828	0.076087	0.0277778	0.208333	-0.00712635	-0.00097735	0.00443515	0.293308		N	N
NELL1	rs72942547	Chr11:20825568	G	A	0.03125	0.0789474	0.0869565	0.32	0.0344828	0.0543478	0	0.0740741	0	0.006149	0.0115615	0.324381		Y	N
NELL1	rs1857885215	Chr11:20826433	G	C	0	0.0526316	0	0	0	0	0	NA	NA	0.14056	NA	NA		N	N
NELL1	rs55998811	Chr11:20826537	A	G	0.03125	0.0789474	0.0869565	0.32	0.0344828	0.0543478	0	0.0740741	0	0.006149	0.0115615	0.324381		Y	N
NELL1	rs560354622	Chr11:20826781	C	G	0	0.0789474	0	0.02	0.00574713	0	0	0	0	0.140689	0	0.00761651		N	N
NELL1	rs72942551	Chr11:20828162	C	G	0.03125	0.0789474	0.0869565	0.32	0.0316092	0.0543478	0	0.0740741	-0.000368295	0.00849341	0.0142949	0.331746		N	N
NELL1	rs142445866	Chr11:20829295	C	T	0.03125	0.0789474	0.0869565	0.32	0.0316092	0.0543478	0	0.0740741	-0.000368295	0.00849341	0.0142949	0.331746		N	N
NELL1	rs11025774	Chr11:20830221	G	A	0.0625	0.131579	0.0869565	0.34	0.0373563	0.119565	0.138889	0.319444	-0.0284577	0.0117614	-0.019569	0.252429		N	N
NELL1	rs72942558	Chr11:20830681	A	G	0.03125	0.0789474	0.0869565	0.32	0.0316092	0.0543478	0	0.0694444	-0.000368295	0.00849341	0.0142949	0.331746		N	N
NELL1	rs72942559	Chr11:20830814	C	T	0.03125	0.131579	0.0869565	0.34	0.0373563	0.0978261	0.111111	0.287037	-0.0104827	0.0245403	-0.00679	0.283171		N	N
NELL1	rs72935272	Chr11:20854981	T	C	0.03125	0.0789474	0.0652174	0.2	0.0258621	0.0543478	0	0.0648148	-0.0032407	0.0126655	0.00382071	0.173058		Y	N
NELL1	rs1299221391	Chr11:20857719	G	A	0.0625	0	0	0	0	0	0	NA	0.185525	NA	NA	NA		N	N
NELL1	rs7925864	Chr11:20861230	T	A	0.5625	0.552632	0.456522	0.58	0.632184	0.956522	0.277778	0.296296	0.115933	0.113752	0.181958	0.0852725		Y	N
NELL1	rs12285309	Chr11:20861233	T	C	0.4375	0.447368	0.543478	0.42	0.367816	0.0434783	0.555556	0.462963	0.115933	0.113752	0.181958	0.0852725		Y	N
NELL1	rs74725854	Chr11:20861241	A	G	0.125	0.184211	0.347826	0.22	0.117816	0.0217391	0	0	0.023533	0.0636388	0.245443	0.0949522		Y	N
NELL1	rs12278492	Chr11:20861318	A	G	0.53125	0.526316	0.434783	0.58	0.626437	0.956522	0.555556	0.606481	0.132488	0.12866	0.196186	0.0828565		Y	N
NELL1	rs12292934	Chr11:20861627	A	G	0.46875	0.421053	0.543478	0.4	0.327586	0.0434783	0.555556	0.462963	0.16425	0.115635	0.214915	0.0906095		Y	N
NELL1	rs12286775	Chr11:20861661	C	T	0.5625	0.578947	0.456522	0.6	0.66954	0.956522	0.444444	0.490741	0.135039	0.113854	0.212418	0.0893925		Y	N
NELL1	rs12575542	Chr11:20862302	C	T	0.5	0.526316	0.326087	0.44	0.632184	0.826087	0.277778	0.384259	0.084197	0.0609107	0.250088	0.135645		N	N
NELL1	rs6483733	Chr11:20864353	A	G	0.46875	0.473684	0.695652	0.56	0.364943	0.173913	0.722222	0.62037	0.0602812	0.0625558	0.275735	0.137767		N	N
NELL1	rs6483734	Chr11:20864624	G	C	0.5	0.473684	0.695652	0.56	0.362069	0.184783	0.722222	0.62037	0.082705	0.0598048	0.273609	0.135395		N	N
NELL1	rs10766730	Chr11:20865157	C	T	0.5	0.473684	0.695652	0.56	0.362069	0.173913	0.722222	0.625	0.0878014	0.0642127	0.278334	0.139899		N	N
NELL1	rs7105891	Chr11:20865183	A	T	0.5	0.473684	0.695652	0.56	0.362069	0.173913	0.722222	0.625	0.0878014	0.0642127	0.278334	0.139899		N	N
NELL1	rs7120224	Chr11:20865284	A	G	0.5	0.526316	0.304348	0.44	0.637931	0.815217	0.277778	0.375	0.082705	0.0598048	0.273609	0.135395		N	N
NELL1	rs7123735	Chr11:20865411	G	A	0.5	0.526316	0.304348	0.44	0.632184	0.826087	0.111111	0.138889	0.084197	0.0609107	0.273143	0.135645		N	N
NELL1	rs76206184	Chr11:20865493	A	G	0.15625	0.184211	0.347826	0.22	0.109195	0.0217391	0	0	0.0501371	0.0699253	0.258154	0.102936	DAU,EVK,ORQ,YAK	Y	N
NELL1	rs7124195	Chr11:20865902	G	C	0.5	0.473684	0.695652	0.56	0.362069	0.184783	0.722222	0.625	0.082705	0.0598048	0.273609	0.135395		N	N
NELL1	rs10766731	Chr11:20865955	T	A	0.5	0.526316	0.304348	0.44	0.655172	0.815217	0.277778	0.375	0.0938003	0.0699364	0.289125	0.14824		N	N
NELL1	rs10766732	Chr11:20866116	T	C	0.5	0.526316	0.304348	0.44	0.637931	0.815217	0.277778	0.375	0.082705	0.0598048	0.273609	0.135395		N	N
NELL1	rs10766733	Chr11:20866213	T	C	0.5	0.473684	0.695652	0.56	0.362069	0.184783	0.722222	0.625	0.082705	0.0598048	0.273609	0.135395		N	N
NELL1	rs7128124	Chr11:20866485	G	T	0.5	0.526316	0.304348	0.44	0.635057	0.826087	0.277778	0.37037	0.0859932	0.0625558	0.275735	0.137767		N	N
NELL1	rs7109712	Chr11:20867489	G	A	0.5	0.526316	0.304348	0.44	0.635057	0.826087	0.0555556	0.106481	0.0859932	0.0625558	0.275735	0.137767		N	N
NELL1	rs7109481	Chr11:20867498	G	C	0.5	0.473684	0.695652	0.56	0.364943	0.173913	0.722222	0.625	0.0859932	0.0625558	0.275735	0.137767		N	N
NELL1	rs4923128	Chr11:20870251	G	A	0.5	0.447368	0.673913	0.56	0.353448	0.173913	0.861111	0.810185	0.0934182	0.0496123	0.262894	0.1464		N	N
NELL1	rs7109004	Chr11:20871217	T	C	0.5	0.552632	0.326087	0.44	0.646552	0.826087	0.0833333	0.12963	0.0934182	0.0496123	0.262894	0.1464		N	N
NELL1	rs2403637	Chr11:20871531	T	C	0.5	0.552632	0.326087	0.44	0.643678	0.826087	0.138889	0.148148	0.0915736	0.0480831	0.260328	0.144237		N	N
NELL1	rs2403638	Chr11:20871540	G	T	0.5	0.447368	0.673913	0.56	0.356322	0.173913	0.833333	0.777778	0.0915736	0.0480831	0.260328	0.144237		N	N
NELL1	rs12295602	Chr11:20871662	T	C	0.15625	0.184211	0.347826	0.22	0.103448	0.0217391	0	0	0.0520748	0.0745113	0.267089	0.108693	DAU,EVK,ORQ,YAK	N	N
NELL1	rs11025790	Chr11:20871847	G	A	0.5	0.526316	0.326087	0.44	0.646552	0.782609	0.0833333	0.157407	0.0756283	0.0548042	0.24394	0.129206		N	N
NELL1	rs11025791	Chr11:20871866	A	G	0.5	0.526316	0.326087	0.44	0.646552	0.826087	0.0833333	0.157407	0.0934182	0.0701616	0.262894	0.1464		N	N
NELL1	rs11025793	Chr11:20871944	G	A	0.5	0.526316	0.326087	0.44	0.637931	0.815217	0.0833333	0.12963	0.082705	0.0606142	0.250392	0.135395		N	N
NELL1	rs11025794	Chr11:20872101	C	A	0.5	0.5	0.326087	0.44	0.646552	0.804348	0.0555556	0.106481	0.0831763	0.0821025	0.253031	0.137194		N	N
NELL1	rs11025795	Chr11:20872253	A	G	0.5	0.5	0.326087	0.44	0.640805	0.804348	0.0555556	0.106481	0.0795486	0.0784967	0.248037	0.133004		N	N
NELL1	rs10766736	Chr11:20872503	C	T	0.5	0.5	0.326087	0.44	0.643678	0.815217	0.111111	0.203704	0.0863967	0.0849516	0.255462	0.139653		N	N
NELL1	rs16906959	Chr11:20872526	T	G	0.15625	0.184211	0.347826	0.22	0.112069	0.0217391	0	0	0.049519	0.0673956	0.253787	0.10005	DAU,EVK,ORQ,YAK	Y	N
NELL1	rs10766737	Chr11:20872552	T	C	0.5	0.5	0.326087	0.44	0.643678	0.815217	0.0833333	0.157407	0.0863967	0.0849516	0.255462	0.139653		N	N
NELL1	rs10766738	Chr11:20872873	T	C	0.5	0.526316	0.369565	0.48	0.643678	0.815217	0.0833333	0.157407	0.0863967	0.0639768	0.209845	0.102709		N	N
NELL1	rs10430903	Chr11:20873840	T	C	0.5	0.473684	0.630435	0.52	0.353448	0.195652	0.888889	0.796296	0.0831763	0.0612856	0.207278	0.100333		N	N
NELL1	rs7121903	Chr11:20874235	T	G	0.5	0.526316	0.369565	0.48	0.649425	0.826087	0.0833333	0.12963	0.0952754	0.0718669	0.219656	0.110987		N	N
NELL1	rs10766739	Chr11:20876844	A	G	0.40625	0.5	0.304348	0.42	0.632184	0.826087	0.0833333	0.0648148	0.169122	0.0820731	0.273894	0.154122		N	N
NELL1	rs4923131	Chr11:20880181	C	G	0.40625	0.5	0.304348	0.42	0.635057	0.815217	0.138889	0.101852	0.165831	0.0792193	0.271799	0.151792		N	N
NELL1	rs7939708	Chr11:20880229	A	G	0.40625	0.5	0.304348	0.42	0.635057	0.815217	0.0833333	0.0648148	0.165831	0.0792193	0.271799	0.151792		N	N
NELL1	rs10766740	Chr11:20887755	G	A	0.5625	0.5	0.347826	0.5	0.62069	0.847826	0.305556	0.24537	0.044248	0.0858426	0.225856	0.0841004		Y	N
NELL1	rs10833407	Chr11:20889985	C	A	0.5625	0.5	0.347826	0.5	0.623563	0.858696	0.305556	0.24537	0.049739	0.092263	0.23269	0.0898947		Y	N
NELL1	rs10766741	Chr11:20890357	G	A	0.5625	0.473684	0.347826	0.5	0.571839	0.869565	0.0277778	0.00462963	0.032828	0.0849898	0.191752	0.062161		N	N
NELL1	rs4923147	Chr11:20891150	T	C	0.5625	0.473684	0.347826	0.5	0.574713	0.858696	0.0277778	0.0138889	0.029651	0.0823008	0.19025	0.0596091		N	N
NELL1	rs10833408	Chr11:20891881	T	C	0.59375	0.473684	0.347826	0.5	0.574713	0.869565	0.0277778	0.0138889	0.0154435	0.0868948	0.194225	0.0633901		N	N
NELL1	rs10833409	Chr11:20891927	C	T	0.5625	0.473684	0.347826	0.5	0.574713	0.869565	0.0833333	0.0416667	0.034055	0.0868948	0.194225	0.0633901		N	N
NELL1	rs2195562	Chr11:20892559	T	C	0.5625	0.473684	0.347826	0.5	0.574713	0.869565	0.361111	0.388889	0.034055	0.0868948	0.194225	0.0633901		N	N
NELL1	rs12226652	Chr11:20892809	A	G	0.5625	0.473684	0.347826	0.5	0.577586	0.869565	0.361111	0.398148	0.035333	0.0887152	0.196652	0.0650715		N	N
NELL1	rs61880426	Chr11:20894790	T	C	0.125	0.210526	0.304348	0.22	0.132184	0.0217391	0	0	0.0185572	0.0782474	0.174084	0.0831392	DAU,EVK,ORQ,YAK	Y	N
NELL1	rs4293115	Chr11:20899707	T	C	0.5625	0.473684	0.347826	0.5	0.548851	0.858696	0.0833333	0.0601852	0.018193	0.0677185	0.168777	0.048149		Y	N
NELL1	rs1078171	Chr11:20900298	G	A	0.5625	0.473684	0.347826	0.5	0.545977	0.858696	0.0277778	0.0138889	0.016869	0.0663945	0.166451	0.046825		Y	N
NELL1	rs60652265	Chr11:20900760	T	A	0.125	0.210526	0.304348	0.22	0.132184	0.0108696	0.277778	0.273148	0.0347867	0.0934571	0.185846	0.0946673		Y	N
NELL1	rs891352	Chr11:20901023	G	A	0.5625	0.473684	0.347826	0.5	0.545977	0.858696	0.0833333	0.0509259	0.016869	0.0663945	0.166451	0.046825		Y	N
NELL1	rs1110609	Chr11:20901154	A	T	0.4375	0.526316	0.652174	0.5	0.454023	0.130435	0.916667	0.949074	0.021111	0.0708265	0.170264	0.050444		Y	N
NELL1	rs4255533	Chr11:20901294	C	T	0.5625	0.473684	0.347826	0.5	0.545977	0.858696	0.361111	0.314815	0.016869	0.0663945	0.166451	0.046825		Y	N
NELL1	rs7105184	Chr11:20901402	C	T	0.5625	0.473684	0.347826	0.5	0.543103	0.858696	0.0277778	0.0138889	0.015594	0.0651195	0.164073	0.04555		Y	N
NELL1	rs7105313	Chr11:20901516	C	T	0.5625	0.473684	0.347826	0.5	0.545977	0.858696	0.0277778	0.0138889	0.016869	0.0663945	0.166451	0.046825		Y	N
NELL1	rs80089976	Chr11:20901734	A	G	0.90625	0.789474	0.695652	0.78	0.867816	0.98913	1	1	0.0091643	0.0934571	0.185846	0.0946673	DAU,EVK,ORQ,YAK	Y	N
NELL1	rs10766743	Chr11:20903493	T	G	0.5625	0.473684	0.347826	0.5	0.554598	0.858696	0.0277778	0.0138889	0.020766	0.0702915	0.173511	0.050722		Y	N
NELL1	rs61880437	Chr11:20904526	G	T	0.125	0.210526	0.304348	0.22	0.132184	0.0108696	0	0	0.0347867	0.0934571	0.185846	0.0946673	DAU,EVK,ORQ,YAK	Y	N
NELL1	rs61880439	Chr11:20904962	A	G	0.09375	0.210526	0.304348	0.22	0.132184	0.0108696	0	0	0.0091643	0.0934571	0.185846	0.0946673	DAU,EVK,ORQ,YAK	Y	N
NELL1	rs76929535	Chr11:20907260	C	T	0.125	0.210526	0.304348	0.22	0.135057	0	0	0	0.0597031	0.110011	0.195387	0.105983	DAU,EVK,ORQ,YAK	N	N
NELL1	rs4923164	Chr11:20909992	G	C	0.5625	0.5	0.369565	0.48	0.543103	0.869565	0.0833333	0.0509259	0.019875	0.0538325	0.148186	0.06047		N	N
NELL1	rs79863839	Chr11:20911263	A	C	0.09375	0.210526	0.304348	0.22	0.137931	0	0	0	0.0327269	0.10816	0.192244	0.103925	DAU,EVK,ORQ,YAK	Y	N
NELL1	rs2082080	Chr11:20912902	C	T	0.53125	0.5	0.326087	0.48	0.534483	0.858696	0.0833333	0.0601852	0.029399	0.0455455	0.177611	0.052806		Y	N
NELL1	rs80053329	Chr11:20912978	T	C	0.125	0.210526	0.304348	0.22	0.135057	0	0	0	0.0595519	0.110168	0.195447	0.106059	DAU,EVK,ORQ,YAK	Y	Y (17.77)
NELL1	rs201961783	Chr11:20913288	C	A	0.125	0.210526	0.304348	0.22	0.135057	0	0	0	0.0595519	0.110168	0.195447	0.106059	DAU,EVK,ORQ,YAK	Y	N
NELL1	rs1465602	Chr11:20914032	T	A	0.5	0.5	0.347826	0.38	0.525862	0.836957	0.0277778	0.0138889	0.0352805	0.0347955	0.143969	0.114711		Y	N
NELL1	rs769311328	Chr11:20918348	G	A	0	0.0789474	0.0434783	0.04	0	0	0	NA	NA	0.204285	0.101408	0.0875008	EVK,ORQ,YAK	N	N
NELL1	rs79474191	Chr11:20931861	C	T	0.09375	0.131579	0.152174	0.24	0.0890805	0.0108696	0	NA	0.02388	0.0466553	0.0614982	0.161538	DAU,EVK,ORQ,YAK	N	N
NELL1	rs7113943	Chr11:20933638	C	T	0.625	0.473684	0.456522	0.38	0.66954	0.771739	0.361111	0.310185	0.0076502	0.107426	0.123647	0.200555		N	N
NELL1	rs61652119	Chr11:20933724	G	A	0.125	0.184211	0.152174	0.28	0.091954	0.0108696	0	0	0.0485203	0.100854	0.0593118	0.20529	DAU,EVK,ORQ,YAK	N	N
NELL1	rs10833413	Chr11:20934885	G	C	0.65625	0.526316	0.456522	0.42	0.678161	0.771739	0.361111	0.342593	-0.00073725	0.0679362	0.129481	0.166545		N	N
NELL1	rs10741860	Chr11:20935142	C	G	0.625	0.473684	0.456522	0.38	0.675287	0.771739	0.361111	0.342593	0.0088465	0.11119	0.127545	0.205024		N	N
NELL1	rs16907072	Chr11:20935979	T	C	0.125	0.184211	0.152174	0.34	0.0977011	0.076087	0.0833333	0.106481	0	0.0306321	0.00738602	0.208404		N	N
NELL1	rs12286075	Chr11:20937248	T	C	0.3125	0.394737	0.521739	0.38	0.385057	0.0434783	0.305556	0.231481	0.0277465	0.0738025	0.151651	0.0517365		N	N
NELL1	rs7930772	Chr11:20937458	T	C	0.78125	0.763158	0.695652	0.58	0.75	0.98913	0.611111	0.685185	0.064198	0.065239	0.0971965	0.185754		Y	N
NELL1	rs1880088	Chr11:20937639	A	T	0.53125	0.421053	0.304348	0.3	0.520115	0.815217	0.25	0.236111	0.007617	0.0703107	0.172087	0.17713		N	N
NELL1	rs8176786	Chr11:20937848	C	T	0.125	0.184211	0.152174	0.26	0.091954	0.0108696	0	0	0.0487381	0.100671	0.0591804	0.181154	DAU,EVK,ORQ,YAK	N	Y (23)
NELL1	rs8176791	Chr11:20937919	C	A	0.3125	0.394737	0.521739	0.38	0.387931	0.0434783	0.361111	0.375	0.0264615	0.0725175	0.149601	0.0504515		N	N
NELL1	rs1880085	Chr11:20937987	G	A	0.53125	0.421053	0.304348	0.3	0.520115	0.815217	0.25	0.236111	0.007617	0.0703107	0.172087	0.17713		N	N
NELL1	rs4923182	Chr11:20939327	T	C	0.53125	0.421053	0.304348	0.3	0.520115	0.815217	0.25	0.240741	0.007617	0.0703107	0.172087	0.17713		N	N
NELL1	rs4923183	Chr11:20939358	G	T	0.53125	0.421053	0.304348	0.3	0.520115	0.815217	0.222222	0.222222	0.007617	0.0703107	0.172087	0.17713		N	N
NELL1	rs4923184	Chr11:20939371	A	G	0.53125	0.421053	0.304348	0.3	0.520115	0.815217	0.222222	0.222222	0.007617	0.0703107	0.172087	0.17713		N	N
NELL1	rs4923185	Chr11:20939459	G	C	0.53125	0.421053	0.304348	0.3	0.520115	0.815217	0.222222	0.222222	0.007617	0.0703107	0.172087	0.17713		N	N
NELL1	rs4923186	Chr11:20939534	C	T	0.53125	0.421053	0.304348	0.3	0.520115	0.815217	0.222222	0.222222	0.007617	0.0703107	0.172087	0.17713		N	N
NELL1	rs7939024	Chr11:20939586	G	A	0.53125	0.421053	0.304348	0.3	0.520115	0.815217	0.222222	0.222222	0.007617	0.0703107	0.172087	0.17713		N	N
NELL1	rs7938737	Chr11:20939637	A	C	0.53125	0.421053	0.304348	0.3	0.520115	0.815217	0.222222	0.222222	0.007617	0.0703107	0.172087	0.17713		N	N
NELL1	rs7939060	Chr11:20939767	C	T	0.53125	0.421053	0.304348	0.3	0.520115	0.815217	0.277778	0.24537	0.007617	0.0703107	0.172087	0.17713		N	N
NELL1	rs10833414	Chr11:20939798	G	C	0.53125	0.421053	0.304348	0.3	0.520115	0.815217	0.222222	0.222222	0.007617	0.0703107	0.172087	0.17713		N	N
NELL1	rs189203311	Chr11:20939922	T	C	0.0625	0.0526316	0.0434783	0.04	0	0	0	0	0.185525	0.14056	0.101408	0.0875008	DAU,EVK,ORQ,YAK	N	N
NELL1	rs192839848	Chr11:20939924	A	G	0.0625	0.0526316	0.0434783	0.04	0	0	0	0	0.185525	0.14056	0.101408	0.0875008	DAU,EVK,ORQ,YAK	N	N
NELL1	rs10766747	Chr11:20940158	T	C	0.53125	0.421053	0.304348	0.3	0.525862	0.815217	0.222222	0.222222	0.010182	0.0740492	0.176865	0.181935		N	N
NELL1	rs202002957	Chr11:20940278	T	C	0.1875	0.157895	0.0652174	0.04	0.0632184	0	0	NA	0.173098	0.123662	0.0232875	0.0036974	DAU,EVK,ORQ,YAK	N	N
NELL1	rs7942651	Chr11:20940447	C	T	0.53125	0.421053	0.304348	0.3	0.525862	0.782609	0.222222	0.222222	0.002762	0.0639747	0.167025	0.172488		N	N
NELL1	rs11025824	Chr11:20941003	G	A	0.6875	0.473684	0.478261	0.52	0.678161	0.945652	0.75	0.74537	0.045894	0.205274	0.192622	0.152997		N	N
NELL1	rs2896621	Chr11:20942002	A	G	0.3125	0.526316	0.521739	0.48	0.321839	0.0543478	0	0.0324074	0.045894	0.205274	0.192622	0.152997		N	N
NELL1	rs74578408	Chr11:20943239	T	C	0.125	0.184211	0.152174	0.26	0.0948276	0.0108696	0	0	0.0477468	0.0978903	0.057088	0.177135	DAU,EVK,ORQ,YAK	N	N
NELL1	rs757190185	Chr11:20945379	G	A	0.03125	0.0526316	0	0	0	0	0	NA	0.0936797	0.14056	NA	NA	DAU,EVK	N	N
NELL1	rs79221907	Chr11:20950615	C	G	0.09375	0.184211	0.152174	0.32	0.091954	0.0652174	0	0	0	0.0423142	0.0154374	0.202726	DAU,EVK,ORQ,YAK	N	N
NELL1	rs188339263	Chr11:20950950	C	T	0.0625	0.0526316	0.0434783	0.04	0	0	0	0	0.185525	0.14056	0.101408	0.0875008	DAU,EVK,ORQ,YAK	N	N
NELL1	rs75748931	Chr11:20950986	C	T	0.125	0.184211	0.152174	0.26	0.091954	0.0108696	0	0	0.0487381	0.100671	0.0591804	0.181154	DAU,EVK,ORQ,YAK	N	N
NELL1	rs1987307	Chr11:20952310	A	C	0.125	0.184211	0.152174	0.32	0.0948276	0.0652174	0	0	0	0.0405246	0.0143363	0.199016	DAU,EVK,ORQ,YAK	N	Y (15.04)
NELL1	rs541926386	Chr11:20952329	T	C	0	0.0526316	0.0217391	0	0	0	0	0	NA	0.14056	0.0463476	NA	EVK,ORQ	N	Y (21.5)
NELL1	rs1400378	Chr11:20954769	C	G	0.375	0.289474	0.217391	0.32	0.373563	0.902174	0.611111	0.587963	0.0563445	0.0969734	0.150143	0.0749985		N	N
NELL1	rs60308950	Chr11:20954777	C	G	0.28125	0.394737	0.413043	0.26	0.247126	0.0434783	0	0.0277778	0.0642035	0.150369	0.160829	0.038018		N	N
NELL1	rs11025833	Chr11:20955113	A	T	0.28125	0.394737	0.413043	0.26	0.247126	0.0434783	0	0.0277778	0.0642035	0.150369	0.160829	0.038018		N	N
NELL1	rs12049833	Chr11:20956594	T	C	0.28125	0.394737	0.456522	0.26	0.252874	0.0434783	0	0.00462963	0.0620565	0.145805	0.197761	0.035871	DAU,EVK,ORQ,YAK	N	N
NELL1	rs16907140	Chr11:20957087	G	A	0.59375	0.473684	0.652174	0.42	0.517241	0.0543478	0.111111	0.0925926	0.123412	0.0504685	0.15117	0.0103995		N	N
NELL1	rs142029435	Chr11:20962225	A	G	0.15625	0	0.0434783	0	0.0373563	0	0	0	0.175623	-0.00511052	0.0157145	-0.00328285		N	N
NELL1	rs56030353	Chr11:20975982	C	G	0.0625	0.0263158	0	0	0	0	0	NA	0.185525	0.0676997	NA	NA		N	N
NELL1	rs544297689	Chr11:20987541	C	T	0.03125	0.0263158	0.0652174	0.06	0	0	0	0	0.0936797	0.0676997	0.151516	0.132226		N	N
NELL1	rs143050787	Chr11:20988174	C	T	0.03125	0.0526316	0.0217391	0.1	0	0	0	0	0.0936797	0.14056	0.0463476	0.21246		N	N
NELL1	rs1272256438	Chr11:20994417	C	A	0.03125	0.0526316	0	0	0	0	0	NA	0.0936797	0.14056	NA	NA		N	N
NELL1		Chr11:20996445	C	A	0	0.0526316	0	0	0	0	0	NA	NA	0.14056	NA	NA	EVK	N	N
NELL1	rs570345725	Chr11:21004195	G	A	0	0.0263158	0	0.08	0	0	0	0	NA	0.0676997	NA	0.17374	EVK,YAK	N	N
NELL1	rs571202969	Chr11:21012300	A	G	0.03125	0.0526316	0.0217391	0.1	0	0	0	NA	0.0936797	0.14056	0.0463476	0.21246	EVK,YAK	N	N
NELL1	rs138642455	Chr11:21022519	A	G	0	0.0789474	0	0	0.00287356	0	0	NA	0	0.166373	0	0	EVK	N	N
NELL1	rs11025879	Chr11:21027102	A	T	0.375	0.5	0.413043	0.44	0.321839	0.0326087	0.25	0.208333	0.108011	0.196937	0.114379	0.131003		N	N
NELL1	rs16907292	Chr11:21028414	C	A	0.375	0.5	0.413043	0.44	0.324713	0.0326087	0	0	0.106802	0.194627	0.112605	0.129053		N	N
NELL1	rs7126181	Chr11:21029906	C	T	0.375	0.5	0.413043	0.44	0.324713	0.0326087	0.305556	0.291667	0.106869	0.194536	0.112532	0.128993		N	Y (17.9)
NELL1	rs16907295	Chr11:21030012	C	A	0.375	0.5	0.413043	0.44	0.324713	0.0326087	0	0	0.106869	0.194536	0.112532	0.128993		N	N
NELL1	rs12574969	Chr11:21030577	G	A	0.375	0.526316	0.413043	0.44	0.324713	0.0434783	0	0	0.0942575	0.209503	0.103752	0.12116	EVK	N	N
NELL1	rs11025880	Chr11:21030732	T	A	0.375	0.5	0.413043	0.44	0.321839	0.0326087	0.25	0.208333	0.108078	0.196847	0.114305	0.130944		N	N
NELL1	rs7482430	Chr11:21036286	A	G	0.375	0.5	0.413043	0.44	0.321839	0.0326087	0	0	0.108145	0.196757	0.114232	0.130884	EVK	N	N
NELL1	rs4469890	Chr11:21036586	G	A	0.375	0.5	0.413043	0.44	0.321839	0.0326087	0	0	0.108145	0.196757	0.114232	0.130884	EVK	N	N
NELL1	rs3897816	Chr11:21037091	T	C	0.375	0.5	0.413043	0.44	0.324713	0.0434783	0.0555556	0.134259	0.095359	0.185994	0.104272	0.121596		N	N
NELL1	rs77382604	Chr11:21039860	A	G	0.28125	0.473684	0.326087	0.32	0.255747	0	0	0.0231481	0.123907	0.258619	0.117625	0.109576		N	N
NELL1	rs76660616	Chr11:21039977	C	T	0.21875	0.473684	0.304348	0.32	0.175287	0	0	0	0.114971	0.347689	0.156045	0.16657		N	N
NELL1	rs11025886	Chr11:21041143	G	A	0.21875	0.473684	0.304348	0.32	0.189655	0.0108696	0	0	0.0870175	0.319046	0.131588	0.142857	EVK,YAK	N	N
NELL1	rs10833434	Chr11:21041309	G	A	0.21875	0.5	0.347826	0.36	0.198276	0.141304	0.111111	0.171296	0.00049144	0.235962	0.0768515	0.0879646		N	N
NELL1	rs10833435	Chr11:21041349	A	G	0.78125	0.447368	0.652174	0.56	0.778736	0.73913	0.583333	0.574074	0	0.186848	0.015159	0.0811768		N	N
NELL1	rs58910000	Chr11:21041424	G	A	0.21875	0.473684	0.304348	0.32	0.189655	0	0	0	0.10971	0.329656	0.144437	0.154246	EVK,YAK	N	N
NELL1	rs12574633	Chr11:21042315	A	G	0.25	0.5	0.304348	0.32	0.189655	0	0.0277778	0.0231481	0.130722	0.357166	0.144437	0.154246		N	N
NELL1	rs72941928	Chr11:21043678	G	A	0.96875	0.710526	0.76087	0.78	0.876437	0.98913	1	1	-0.0183793	0.192969	0.122675	0.100232	EVK,YAK	N	N
NELL1	rs72941930	Chr11:21043754	T	A	0.03125	0.289474	0.23913	0.22	0.123563	0.0108696	0.111111	0.194444	-0.0183793	0.192969	0.122675	0.100232		N	N
NELL1	rs374411104	Chr11:21048967	T	C	0.0625	0.0263158	0	0	0	0	0	0	0.185525	0.0676997	NA	NA	EVK	N	N
NELL1	rs59870340	Chr11:21048969	G	A	0.03125	0.289474	0.23913	0.22	0.123563	0	0	0	-0.00608185	0.209361	0.137138	0.113771	EVK,YAK	N	N
NELL1	rs72941943	Chr11:21052500	A	G	0.03125	0.289474	0.23913	0.22	0.123563	0.0108696	0	0	-0.0183793	0.192969	0.122675	0.100232	EVK,ORQ,YAK	N	N
NELL1	rs7108264	Chr11:21053593	C	T	0.96875	0.710526	0.76087	0.78	0.87931	0.98913	0.861111	0.787037	-0.0182561	0.196449	0.125422	0.102687		N	N
NELL1	rs202164694	Chr11:21057173	C	A	0.03125	0.105263	0.0652174	0.14	0	0	0	NA	0.0936797	0.260813	0.151516	0.282853	EVK,ORQ,YAK	N	N
NELL1	rs79489614	Chr11:21067401	A	C	0	0.131579	0.0217391	0.08	0.0201149	0	0	0	-0.00305989	0.176733	0.00513946	0.0721862	EVK,ORQ,YAK	N	N
NELL1		Chr11:21072325	C	A	0	0.0789474	0	0	0	0	0	NA	NA	0.204285	NA	NA	EVK	N	N
NELL1	rs11025911	Chr11:21087344	T	G	0.125	0.263158	0.217391	0.28	0.106322	0	0	0	0.0694291	0.199241	0.132073	0.197396	DAU,EVK,ORQ,YAK	N	Y (15.13)
NELL1	rs562652873	Chr11:21119682	C	T	0	0.105263	0.0217391	0.08	0.00574713	0	0	0	0	0.1944	0.010521	0.125476	EVK,ORQ,YAK	N	N
NELL1	rs1323739953	Chr11:21128168	A	C	0.0625	0	0.0217391	0	0	0	0	NA	0.185525	NA	0.0463476	NA	DAU,ORQ	N	N
NELL1	rs554977420	Chr11:21136170	G	A	0	0.0526316	0	0.04	0	0	0	NA	NA	0.14056	NA	0.0875008	EVK,YAK	N	N
NELL1	rs910821085	Chr11:21146765	G	A	0.0625	0	0	0	0	0	0	NA	0.185525	NA	NA	NA	DAU	N	N
NELL1	rs11025947	Chr11:21151112	T	C	0.375	0.710526	0.73913	0.66	0.517241	0.206522	0.222222	0.208333	-0.0454646	0.150098	0.177964	0.104972		N	N
NELL1	rs16907546	Chr11:21151475	C	T	0.34375	0.684211	0.717391	0.66	0.511494	0.195652	0.222222	0.208333	-0.0481515	0.133231	0.164646	0.111998		N	N
NELL1	rs7128983	Chr11:21151772	T	C	0.34375	0.710526	0.717391	0.66	0.511494	0.195652	0.194444	0.203704	-0.0481515	0.157869	0.164646	0.111998		N	N
NELL1	rs7129124	Chr11:21151912	C	T	0.65625	0.289474	0.282609	0.34	0.488506	0.793478	0.805556	0.796296	-0.0472396	0.154785	0.161822	0.109237		N	N
NELL1	rs7113280	Chr11:21152108	C	T	0.34375	0.710526	0.717391	0.66	0.511494	0.195652	0.194444	0.203704	-0.0481515	0.157869	0.164646	0.111998		N	N
NELL1	rs7113397	Chr11:21152165	C	T	0.34375	0.710526	0.717391	0.66	0.511494	0.195652	0.194444	0.203704	-0.0481515	0.157869	0.164646	0.111998		N	N
NELL1	rs11025950	Chr11:21154784	A	G	0.34375	0.684211	0.717391	0.52	0.485632	0.141304	0.111111	0.157407	-0.0395744	0.171776	0.202007	0.042936		N	N
NELL1	rs7125832	Chr11:21154786	G	C	0.65625	0.315789	0.282609	0.48	0.514368	0.847826	0.722222	0.75463	-0.0412489	0.167966	0.19876	0.039628		N	N
NELL1	rs16907562	Chr11:21156468	A	G	0.3125	0.631579	0.73913	0.5	0.485632	0.141304	0.0833333	0.115741	-0.0460016	0.125414	0.223541	0.03127		N	N
NELL1	rs16907565	Chr11:21156570	A	T	0.3125	0.631579	0.73913	0.5	0.485632	0.141304	0.0555556	0.0972222	-0.0460016	0.125414	0.223541	0.03127		N	N
NELL1	rs61880830	Chr11:21156821	G	A	0.3125	0.631579	0.73913	0.5	0.485632	0.141304	0.0555556	0.0972222	-0.0460016	0.125414	0.223541	0.03127		N	N
NELL1	rs78784552	Chr11:21163399	G	C	0.03125	0.105263	0.0652174	0.08	0.0114943	0	0	0	0.0193449	0.15778	0.0736037	0.0930842	EVK,ORQ,YAK	N	N
NELL1	rs11025952	Chr11:21163628	A	G	0.3125	0.631579	0.73913	0.5	0.491379	0.141304	0.111111	0.134259	-0.046794	0.121178	0.218453	0.0284635		N	N
NELL1	rs67524691	Chr11:21164191	T	C	0.3125	0.631579	0.73913	0.5	0.491379	0.141304	0.138889	0.143519	-0.046794	0.121178	0.218453	0.0284635		N	N
NELL1	rs4923385	Chr11:21165173	T	C	0.3125	0.631579	0.73913	0.5	0.494253	0.141304	0.25	0.273148	-0.0471803	0.119074	0.215917	0.027051		N	N
NELL1	rs35975633	Chr11:21166406	A	T	0.3125	0.631579	0.73913	0.5	0.488506	0.141304	0.0833333	0.115741	-0.046401	0.123292	0.220994	0.02987		N	N
NELL1	rs10500895	Chr11:21167611	A	G	0.3125	0.631579	0.73913	0.5	0.494253	0.141304	0.111111	0.125	-0.0471803	0.119074	0.215917	0.027051		N	N
NELL1	rs76565403	Chr11:21168425	T	A	0.09375	0.0526316	0	0.02	0.00287356	0	0	0	0.219611	0.100544	0	0.0153775	EVK,YAK	N	N
NELL1	rs877983	Chr11:21180232	G	A	0.25	0.552632	0.673913	0.4	0.439655	0.130435	0.0555556	0.0972222	-0.0461713	0.0964283	0.203702	-2.7e-05		N	N
NELL1	rs1190334988	Chr11:21180443	C	G	0	0.0526316	0	0.04	0	0	0	NA	NA	0.14056	NA	0.0875008	EVK,YAK	N	N
NELL1	rs79245106	Chr11:21183178	A	G	0.15625	0.131579	0.304348	0.14	0.132184	0	0.0555556	0.0555556	0.085193	0.0525685	0.199876	0.045757		N	N
NELL1	rs7115087	Chr11:21188815	T	C	0.6875	0.315789	0.456522	0.52	0.531609	0.0869565	0.166667	0.189815	0.162597	-0.0369753	0.0067195	0.040604		Y	N
NELL1	rs7115088	Chr11:21188817	T	G	0.6875	0.315789	0.456522	0.52	0.531609	0.0869565	0.166667	0.189815	0.162597	-0.0369753	0.0067195	0.040604		Y	N
NELL1	rs7103385	Chr11:21190062	A	G	0.6875	0.315789	0.456522	0.52	0.534483	0.0869565	0.0833333	0.0972222	0.160352	-0.0373001	0.0052105	0.039095		Y	N
NELL1	rs1670621	Chr11:21190378	A	G	0.6875	0.315789	0.456522	0.52	0.534483	0.0869565	0.305556	0.259259	0.160352	-0.0373001	0.0052105	0.039095		Y	N
NELL1	rs7107350	Chr11:21190586	G	T	0.6875	0.315789	0.456522	0.5	0.531609	0.0869565	0.166667	0.212963	0.162597	-0.0369753	0.0067195	0.0287995		Y	N
NELL1	rs1405640711	Chr11:21195637	T	C	0	0.0789474	0	0	0	0	0	0	NA	0.204285	NA	NA		N	N
NELL1	rs544087039	Chr11:21197230	C	T	0	0.105263	0.0217391	0.04	0.00862069	0	0	0	0	0.174194	0.00819935	0.0346705		N	N
NELL1	rs185978739	Chr11:21200561	A	C	0	0.0789474	0.0217391	0	0	0	0	0	NA	0.204285	0.0463476	NA		N	N
NELL1		Chr11:21204465	C	A	0.03125	0.0526316	0	0	0	0	0	NA	0.0936797	0.14056	NA	NA		N	N
NELL1	rs186553626	Chr11:21211243	C	T	0.09375	0	0.0434783	0	0.00287356	0	0	0	0.219611	0	0.0695224	0	DAU,ORQ	N	N
NELL1	rs144459537	Chr11:21228389	A	G	0.03125	0.105263	0.0217391	0.08	0.0114943	0	0	0	0.0193449	0.15778	0.00795209	0.0930842	DAU,EVK,ORQ	N	N
NELL1	rs576737275	Chr11:21261081	C	G	0.03125	0.0526316	0.0217391	0.1	0	0	0	NA	0.0936797	0.14056	0.0463476	0.21246	DAU,EVK,ORQ,YAK	N	N
NELL1	rs141145404	Chr11:21273234	G	A	0.15625	0.105263	0.0434783	0.14	0.0431034	0	0	0	0.166604	0.0796764	0.0138054	0.115253	DAU,EVK,ORQ,YAK	N	N
NELL1	rs11529675	Chr11:21278060	A	G	0.3125	0.368421	0.478261	0.3	0.307471	0.0869565	0.416667	NA	0.0262795	0.056427	0.144757	0.015613		N	N
NELL1	rs11026010	Chr11:21304376	G	A	0.28125	0.368421	0.478261	0.3	0.307471	0.076087	0.361111	0.25463	0.0153575	0.064805	0.151727	0.0215935		N	N
NELL1	rs10833500	Chr11:21305577	G	A	0.28125	0.368421	0.478261	0.3	0.316092	0.076087	0.361111	0.25463	0.0120265	0.061474	0.144923	0.0182625		N	N
NELL1	rs80173866	Chr11:21323990	C	T	0	0.0789474	0	0	0.00574713	0	0	0	0	0.140689	0	0	EVK	N	N
NELL1		Chr11:21344157	A	G	0	0.0526316	0	0	0	0	0	NA	NA	0.14056	NA	NA	EVK	N	N
NELL1	rs576606787	Chr11:21347458	C	T	0.03125	0.0526316	0	0.04	0	0	0	NA	0.0936797	0.14056	NA	0.0875008	DAU,EVK,YAK	N	N
NELL1	rs1850852037	Chr11:21353004	T	C	0	0.0789474	0	0	0	0	0	NA	NA	0.204285	NA	NA	EVK	N	N
NELL1	rs11026054	Chr11:21375241	T	C	0.78125	0.921053	0.913043	0.86	0.948276	1	0.833333	0.898148	0.247252	0.0432988	0.0427993	0.0990502		N	N
NELL1	rs549886936	Chr11:21376080	T	G	0	0.0526316	0	0	0	0	0	0	NA	0.14056	NA	NA	EVK	N	N
NELL1	rs970093711	Chr11:21389843	T	C	0	0.0789474	0	0	0.00574713	0	0	NA	0	0.140689	0	0	EVK	N	N
NELL1	rs1054904418	Chr11:21393182	G	C	0	0.0526316	0	0	0	0	0	0	NA	0.14056	NA	NA	EVK	N	Y (17.48)
NELL1	rs7118223	Chr11:21394295	A	G	0	0.0263158	0.0217391	0.12	0.00574713	0	0.0555556	0.0462963	0	0.0196014	0.010521	0.19681		N	N
NELL1	rs139211958	Chr11:21394621	A	C	0	0.0263158	0.0217391	0.12	0.00574713	0	0	0	0	0.0196014	0.010521	0.19681	EVK,ORQ,YAK	N	N
NELL1	rs12293839	Chr11:21396948	T	C	0	0.0263158	0.0217391	0.12	0.00574713	0	0.111111	0.0555556	0	0.0196014	0.010521	0.19681		N	N
NELL1	rs146282919	Chr11:21398391	C	G	0	0.0263158	0.0217391	0.12	0.00574713	0	0.0277778	0.00925926	0	0.0196014	0.010521	0.19681		N	N
NELL1	rs149290706	Chr11:21399565	T	C	0	0.0263158	0.0217391	0.12	0.00574713	0	0.0555556	0.00925926	0	0.0196014	0.010521	0.19681		N	N
NELL1	rs79694858	Chr11:21399596	C	T	0	0.0263158	0.0217391	0.12	0.00574713	0	0.0833333	0.0462963	0	0.0196014	0.010521	0.19681		N	N
NELL1	rs144144982	Chr11:21399942	T	C	0	0.0263158	0.0217391	0.12	0.00574713	0	0.0555556	0.00925926	0	0.0196014	0.010521	0.19681		N	N
NELL1	rs140929228	Chr11:21411252	G	T	0	0.0789474	0	0	0.00287356	0	0	0	0	0.166373	0	0		N	N
NELL1	rs80040351	Chr11:21414707	G	T	0.625	0.736842	0.76087	0.8	0.718391	1	0.916667	0.819444	0.170713	0.0859435	0.055405	0.0299722		N	N
NELL1	rs73457319	Chr11:21414730	G	A	0.375	0.263158	0.23913	0.2	0.278736	0	0.0833333	0.157407	0.172529	0.087099	0.0565605	0.0305582		N	N
NELL1	rs16908068	Chr11:21415348	T	C	0.375	0.263158	0.23913	0.2	0.278736	0	0	0	0.172529	0.087099	0.0578795	0.0305582	DAU,EVK,ORQ,YAK	N	N
NELL1	rs78614510	Chr11:21417514	G	T	0.375	0.263158	0.217391	0.2	0.25	0	0	0	0.192554	0.098272	0.055248	0.0391005	DAU,EVK,ORQ,YAK	N	N
NELL1	rs57936704	Chr11:21418892	A	G	0.4375	0.342105	0.26087	0.2	0.212644	0	0	0	0.284757	0.174812	0.098091	0.0548885	DAU,EVK,ORQ,YAK	N	N
NELL1	rs76765552	Chr11:21426026	G	C	0.40625	0.342105	0.282609	0.22	0.206897	0	0	0	0.259177	0.17949	0.115051	0.0694365	DAU,EVK,ORQ,YAK	N	N
NELL1	rs76806941	Chr11:21427801	G	T	0.40625	0.315789	0.282609	0.24	0.204023	0	0	0	0.262185	0.157188	0.116917	0.081499	DAU,EVK,ORQ,YAK	N	N
NELL1	rs546386058	Chr11:21434473	G	A	0.0625	0	0	0	0	0	0	0	0.185525	NA	NA	NA	DAU	N	N
NELL1	rs79279186	Chr11:21438256	A	G	0.34375	0.289474	0.282609	0.24	0.178161	0.0108696	0	0	0.20628	0.137145	0.119952	0.0790497	DAU,EVK,ORQ,YAK	N	N
NELL1	rs77120294	Chr11:21438677	T	C	0.34375	0.289474	0.304348	0.24	0.178161	0.0108696	0	0	0.20628	0.137145	0.141032	0.0790497	DAU,EVK,ORQ,YAK	N	N
NELL1	rs76609379	Chr11:21438767	A	C	0.40625	0.315789	0.304348	0.24	0.206897	0.0108696	0	0	0.244407	0.139581	0.119331	0.067443	DAU,EVK,ORQ,YAK	N	N
NELL1	rs80082321	Chr11:21445838	T	A	0.40625	0.315789	0.304348	0.24	0.20977	0	0	0	0.256335	0.15291	0.13024	0.0794215	DAU,EVK,ORQ,YAK	N	N
NELL1	rs12574757	Chr11:21446522	T	C	0.40625	0.315789	0.326087	0.24	0.20977	0	0	0	0.256335	0.15291	0.149315	0.0794215	DAU,EVK,ORQ,YAK	N	N
NELL1	rs80263984	Chr11:21447989	G	A	0.34375	0.289474	0.282609	0.24	0.181034	0	0	0	0.220716	0.151196	0.132479	0.090438	DAU,EVK,ORQ,YAK	N	N
NELL1	rs78527679	Chr11:21450498	C	T	0.34375	0.289474	0.26087	0.24	0.178161	0	0	0	0.223486	0.153401	0.115046	0.0921057	DAU,EVK,ORQ,YAK	N	N
NELL1	rs1039849662	Chr11:21453726	C	A	0.0625	0	0	0	0	0	0	0	0.185525	NA	NA	NA	DAU	N	N
NELL1	rs79010424	Chr11:21455927	C	T	0.40625	0.289474	0.26087	0.24	0.201149	0	0	0	0.263454	0.136561	0.101363	0.0828905	DAU,EVK,ORQ,YAK	N	N
NELL1	rs74974722	Chr11:21462969	C	T	0.34375	0.289474	0.282609	0.24	0.178161	0	0	0	0.223486	0.153401	0.133319	0.0921057	DAU,EVK,ORQ,YAK	N	N
NELL1	rs16908121	Chr11:21463112	C	G	0.34375	0.289474	0.282609	0.24	0.178161	0	0	0	0.223486	0.153401	0.133319	0.0921057	DAU,EVK,ORQ,YAK	N	N
NELL1	rs528055441	Chr11:21464398	G	A	0	0.0526316	0	0.08	0	0	0	NA	NA	0.14056	NA	0.17374	EVK,YAK	N	N
NELL1	rs12574839	Chr11:21471596	T	A	0.40625	0.315789	0.282609	0.24	0.20977	0	0	0	0.256335	0.15291	0.113302	0.0794215	DAU,EVK,ORQ,YAK	N	N
NELL1	rs184452521	Chr11:21471597	T	G	0.40625	0.315789	0.282609	0.24	0.20977	0	0	0	0.256335	0.15291	0.113302	0.0794215	DAU,EVK,ORQ,YAK	N	N
NELL1	rs12575233	Chr11:21473273	T	C	0.46875	0.315789	0.326087	0.24	0.227011	0	0	0	0.298922	0.141146	0.137052	0.072921	DAU,EVK,ORQ,YAK	N	N
NELL1	rs74502202	Chr11:21475501	C	G	0.40625	0.289474	0.26087	0.24	0.198276	0	0	0	0.26667	0.13873	0.102503	0.0837695	DAU,EVK,ORQ,YAK	N	N
NELL1	rs78807828	Chr11:21475642	C	T	0.34375	0.289474	0.26087	0.24	0.181034	0	0	0	0.220716	0.151196	0.113152	0.090438	DAU,EVK,ORQ,YAK	N	N
NELL1	rs79661189	Chr11:21482743	G	T	0.34375	0.289474	0.282609	0.24	0.166667	0	0	0	0.235094	0.162696	0.142264	0.099167	DAU,EVK,ORQ,YAK	N	N
NELL1	rs78634128	Chr11:21482845	G	A	0.34375	0.289474	0.282609	0.24	0.178161	0	0	0	0.223486	0.153401	0.133319	0.0921057	DAU,EVK,ORQ,YAK	N	N
NELL1	rs79820735	Chr11:21483480	A	G	0.40625	0.315789	0.304348	0.24	0.206897	0	0	0	0.259177	0.154972	0.132192	0.080512	DAU,EVK,ORQ,YAK	N	N
NELL1	rs12575598	Chr11:21484583	T	G	0.40625	0.315789	0.304348	0.24	0.20977	0	0	0	0.256209	0.152793	0.130159	0.07952	DAU,EVK,ORQ,YAK	N	N
NELL1	rs117532683	Chr11:21486188	C	T	0.125	0.0526316	0.0434783	0.06	0.0143678	0	0	0	0.202973	0.0471406	0.0292956	0.0537931	DAU,EVK,ORQ,YAK	N	N
NELL1	rs12575106	Chr11:21487160	C	A	0.46875	0.315789	0.282609	0.24	0.224138	0	0	0	0.301942	0.143005	0.105697	0.0740265	DAU,EVK,ORQ,YAK	N	N
NELL1	rs79835638	Chr11:21487678	A	C	0.46875	0.315789	0.282609	0.24	0.227011	0	0	0	0.298922	0.141146	0.104592	0.072921	DAU,EVK,ORQ,YAK	N	N
NELL1	rs77219116	Chr11:21487752	A	G	0.53125	0.684211	0.717391	0.76	0.772989	1	1	1	0.298922	0.141146	0.104592	0.072921	DAU,EVK,ORQ,YAK	N	N
NELL1	rs76207544	Chr11:21488095	C	T	0.53125	0.684211	0.717391	0.76	0.772989	1	1	1	0.298922	0.141146	0.104592	0.072921	DAU,EVK,ORQ,YAK	N	N
NELL1	rs182045866	Chr11:21488646	A	G	0.0625	0	0	0	0	0	0	0	0.185525	NA	NA	NA	DAU	N	N
NELL1	rs75008162	Chr11:21488825	T	G	0.46875	0.315789	0.326087	0.24	0.224138	0	0	0	0.301942	0.143005	0.139001	0.0740265	DAU,EVK,ORQ,YAK	N	N
NELL1	rs76624880	Chr11:21489610	G	A	0.46875	0.315789	0.282609	0.24	0.224138	0	0	0	0.301942	0.143005	0.105697	0.0740265	DAU,EVK,ORQ,YAK	N	N
NELL1	rs74478275	Chr11:21489661	T	C	0.46875	0.315789	0.282609	0.24	0.224138	0	0	0	0.301942	0.143005	0.105697	0.0740265	DAU,EVK,ORQ,YAK	N	N
NELL1	rs75479014	Chr11:21490080	A	G	0.46875	0.315789	0.282609	0.24	0.224138	0	0	0	0.301942	0.143005	0.105697	0.0740265	DAU,EVK,ORQ,YAK	N	N
NELL1	rs75588038	Chr11:21492864	G	A	0.46875	0.315789	0.282609	0.24	0.221264	0	0	0	0.304997	0.144896	0.106801	0.07513	DAU,EVK,ORQ,YAK	N	N
NELL1	rs74588953	Chr11:21493006	T	G	0.46875	0.315789	0.282609	0.24	0.221264	0	0	0	0.304997	0.144896	0.106801	0.07513	DAU,EVK,ORQ,YAK	N	N
NELL1	rs80023469	Chr11:21493482	G	A	0.4375	0.315789	0.23913	0.22	0.206897	0	0	0	0.28978	0.154972	0.086811	0.0694365	DAU,EVK,ORQ,YAK	N	N
NELL1	rs75022455	Chr11:21494029	A	G	0.59375	0.710526	0.73913	0.74	0.787356	1	0.944444	0.981481	0.250845	0.12779	0.096898	0.0916415		N	N
NELL1	rs78326280	Chr11:21494280	T	G	0.3125	0.289474	0.304348	0.28	0.201149	0	0.0555556	0.0185185	0.1747	0.135356	0.137462	0.110905		N	N
NELL1	rs4345962	Chr11:21494598	A	G	0.375	0.447368	0.304348	0.42	0.494253	0.934783	0.888889	0.930556	0.14568	0.0936315	0.190826	0.097093		N	N
NELL1	rs75240432	Chr11:21494772	A	T	0.3125	0.315789	0.326087	0.3	0.181034	0	0	0	0.190984	0.174211	0.172799	0.142837	DAU,EVK,ORQ,YAK	N	N
NELL1	rs79119580	Chr11:21495043	A	G	0.6875	0.684211	0.695652	0.7	0.818966	1	1	1	0.190984	0.174211	0.152873	0.142837	DAU,EVK,ORQ,YAK	N	N
NELL1	rs12575995	Chr11:21495296	A	G	0.6875	0.684211	0.695652	0.7	0.818966	1	1	1	0.190984	0.174211	0.152873	0.142837	DAU,EVK,ORQ,YAK	N	N
NELL1	rs12575987	Chr11:21495355	T	C	0.6875	0.684211	0.695652	0.7	0.818966	1	1	1	0.190984	0.174211	0.152873	0.142837	DAU,EVK,ORQ,YAK	N	N
NELL1	rs12576261	Chr11:21495548	G	C	0.6875	0.684211	0.695652	0.7	0.818966	1	1	1	0.190984	0.174211	0.152873	0.142837	DAU,EVK,ORQ,YAK	N	N
NELL1	rs12577342	Chr11:21495975	T	G	0.4375	0.342105	0.304348	0.34	0.221264	0	0	0	0.27268	0.167155	0.12402	0.147193	DAU,EVK,ORQ,YAK	N	N
NELL1	rs12576315	Chr11:21496020	A	G	0.5625	0.657895	0.695652	0.66	0.778736	1	1	1	0.27268	0.167155	0.12402	0.147193	DAU,EVK,ORQ,YAK	N	N
NELL1	rs78528010	Chr11:21496567	G	C	0.5625	0.657895	0.695652	0.66	0.778736	1	1	1	0.27268	0.167155	0.12402	0.147193	DAU,EVK,ORQ,YAK	N	N
NELL1	rs75456061	Chr11:21496831	T	C	0.6875	0.684211	0.695652	0.7	0.821839	1	1	1	0.193446	0.176686	0.155221	0.145134	DAU,EVK,ORQ,YAK	N	N
NELL1	rs76784980	Chr11:21497397	G	A	0.4375	0.342105	0.304348	0.34	0.218391	0.0108696	0	0	0.26197	0.154768	0.112942	0.138362	DAU,EVK,ORQ,YAK	N	N
NELL1	rs75067804	Chr11:21497461	A	G	0.4375	0.342105	0.304348	0.34	0.221264	0	0	0	0.27268	0.167155	0.12402	0.147193	DAU,EVK,ORQ,YAK	N	N
NELL1	rs78905216	Chr11:21498041	A	G	0.4375	0.342105	0.304348	0.34	0.221264	0	0	0	0.27268	0.167155	0.12402	0.148136	DAU,EVK,ORQ,YAK	N	N
NELL1	rs77398053	Chr11:21498788	C	T	0.4375	0.342105	0.304348	0.32	0.221264	0	0	0	0.27268	0.167155	0.12402	0.131016	DAU,EVK,ORQ,YAK	N	N
NELL1	rs78266369	Chr11:21499214	G	C	0.5625	0.657895	0.695652	0.66	0.778736	1	1	NA	0.27268	0.167155	0.12402	0.147193	DAU,EVK,ORQ,YAK	N	N
NELL1	rs77494942	Chr11:21499557	G	A	0.5625	0.657895	0.695652	0.66	0.778736	1	1	NA	0.27268	0.167155	0.12402	0.147193	DAU,EVK,ORQ,YAK	N	N
NELL1	rs76005555	Chr11:21499656	C	G	0.4375	0.342105	0.304348	0.34	0.221264	0	0	0	0.27268	0.167155	0.12402	0.147193	DAU,EVK,ORQ,YAK	N	N
NELL1	rs80101034	Chr11:21499845	A	G	0.5625	0.657895	0.695652	0.66	0.778736	1	1	1	0.27268	0.167155	0.12402	0.147193	DAU,EVK,ORQ,YAK	N	N
NELL1	rs75245709	Chr11:21499976	C	T	0.5625	0.657895	0.695652	0.66	0.778736	1	1	1	0.27268	0.167155	0.12402	0.147193	DAU,EVK,ORQ,YAK	N	N
NELL1	rs80016833	Chr11:21500427	C	T	0.4375	0.342105	0.304348	0.34	0.221264	0	0	0	0.27268	0.167155	0.12402	0.147193	DAU,EVK,ORQ,YAK	N	N
NELL1	rs79730136	Chr11:21500448	A	G	0.5625	0.657895	0.695652	0.66	0.778736	1	1	1	0.27268	0.167155	0.12402	0.147193	DAU,EVK,ORQ,YAK	N	N
NELL1	rs79777416	Chr11:21500874	T	G	0.5625	0.657895	0.695652	0.66	0.778736	1	1	NA	0.27268	0.167155	0.12402	0.147193	DAU,EVK,ORQ,YAK	N	N
NELL1	rs76960076	Chr11:21500912	A	T	0.4375	0.342105	0.304348	0.34	0.221264	0	0	0	0.27268	0.167155	0.12402	0.147193	DAU,EVK,ORQ,YAK	N	N
NELL1	rs74576979	Chr11:21501055	A	G	0.5625	0.657895	0.695652	0.66	0.778736	1	1	1	0.27268	0.167155	0.12402	0.147193	DAU,EVK,ORQ,YAK	N	N
NELL1	rs11026113	Chr11:21501579	T	C	0.25	0.421053	0.23913	0.38	0.436782	0.75	0.722222	0.75463	0.135049	0.0134865	0.149089	0.0349835		N	N
NELL1	rs76132039	Chr11:21502991	T	C	0.4375	0.342105	0.304348	0.34	0.221264	0	0	0	0.27268	0.167155	0.12402	0.147193	DAU,EVK,ORQ,YAK	N	N
NELL1	rs75313688	Chr11:21503069	C	T	0.4375	0.342105	0.304348	0.34	0.221264	0	0	0	0.27268	0.167155	0.12402	0.147193	DAU,EVK,ORQ,YAK	N	N
NELL1	rs76751123	Chr11:21503280	G	A	0.5625	0.657895	0.695652	0.66	0.778736	1	1	1	0.27268	0.167155	0.12402	0.147193	DAU,EVK,ORQ,YAK	N	N
NELL1	rs75033837	Chr11:21503300	A	G	0.4375	0.342105	0.304348	0.34	0.221264	0	0	0	0.27268	0.167155	0.12402	0.147193	DAU,EVK,ORQ,YAK	N	N
NELL1	rs76371108	Chr11:21503327	T	C	0.4375	0.342105	0.304348	0.34	0.221264	0	0	0	0.27268	0.167155	0.12402	0.147193	DAU,EVK,ORQ,YAK	N	N
NELL1	rs80288413	Chr11:21503353	A	C	0.5625	0.657895	0.695652	0.66	0.778736	1	1	1	0.27268	0.167155	0.12402	0.147193	DAU,EVK,ORQ,YAK	N	N
NELL1	rs75691615	Chr11:21503436	G	C	0.4375	0.342105	0.304348	0.34	0.221264	0	0	0	0.27268	0.167155	0.12402	0.147193	DAU,EVK,ORQ,YAK	N	N
NELL1	rs79964491	Chr11:21503517	C	G	0.4375	0.342105	0.304348	0.34	0.221264	0	0	0	0.27268	0.167155	0.12402	0.147193	DAU,EVK,ORQ,YAK	N	N
NELL1	rs77953420	Chr11:21503891	C	T	0.4375	0.342105	0.304348	0.34	0.221264	0	0	0	0.27268	0.167155	0.12402	0.147193	DAU,EVK,ORQ,YAK	N	N
NELL1	rs4151057	Chr11:21503990	C	G	0.4375	0.342105	0.304348	0.34	0.221264	0	0	0	0.27268	0.167155	0.12402	0.147193	DAU,EVK,ORQ,YAK	N	N
NELL1	rs4307715	Chr11:21504522	C	T	0.6875	0.684211	0.695652	0.7	0.821839	1	1	1	0.193446	0.176686	0.155221	0.145134	DAU,EVK,ORQ,YAK	N	N
NELL1	rs4363591	Chr11:21504682	G	C	0.3125	0.315789	0.304348	0.3	0.178161	0	0	0	0.193446	0.176686	0.155221	0.145134	DAU,EVK,ORQ,YAK	N	N
NELL1	rs4363592	Chr11:21504683	G	A	0.3125	0.315789	0.304348	0.3	0.178161	0	0	0	0.193446	0.176686	0.155221	0.145134	DAU,EVK,ORQ,YAK	N	N
NELL1	rs4347390	Chr11:21504711	A	T	0.6875	0.684211	0.695652	0.7	0.821839	1	1	1	0.193446	0.176686	0.155221	0.145134	DAU,EVK,ORQ,YAK	N	N
NELL1	rs4363593	Chr11:21504723	A	G	0.6875	0.684211	0.695652	0.7	0.821839	1	1	1	0.193446	0.176686	0.155221	0.145134	DAU,EVK,ORQ,YAK	N	N
NELL1	rs4309160	Chr11:21504752	T	C	0.3125	0.315789	0.304348	0.3	0.178161	0	0	0	0.193446	0.176686	0.155221	0.145134	DAU,EVK,ORQ,YAK	N	N
NELL1	rs4279993	Chr11:21504897	G	A	0.3125	0.315789	0.304348	0.3	0.178161	0	0	0	0.193446	0.176686	0.155221	0.145134	DAU,EVK,ORQ,YAK	N	N
NELL1	rs57747593	Chr11:21505303	A	G	0.4375	0.342105	0.304348	0.34	0.221264	0	0	0	0.27268	0.167155	0.12402	0.147193	DAU,EVK,ORQ,YAK	N	N
NELL1	rs59244392	Chr11:21505631	C	A	0.5625	0.657895	0.695652	0.66	0.778736	1	1	NA	0.27268	0.167155	0.12402	0.147193	DAU,EVK,ORQ,YAK	N	N
NELL1	rs4597065	Chr11:21505886	G	A	0.6875	0.684211	0.695652	0.7	0.821839	1	1	1	0.193446	0.176686	0.155221	0.145134	DAU,EVK,ORQ,YAK	N	N
NELL1	rs72636003	Chr11:21506805	G	A	0.25	0.394737	0.23913	0.32	0.431034	0.75	0.583333	0.634259	0.13032	0.0246685	0.14428	0.0720633		N	N
NELL1	rs145811982	Chr11:21507901	C	T	0.4375	0.342105	0.304348	0.34	0.221264	0	0	0	0.27268	0.167155	0.12402	0.147193	DAU,EVK,ORQ,YAK	N	N
NELL1	rs12574030	Chr11:21508216	A	G	0.25	0.421053	0.23913	0.38	0.436782	0.75	0.666667	0.694444	0.135049	0.0134865	0.149089	0.0349835		N	N
NELL1	rs78886218	Chr11:21511486	T	A	0.25	0.263158	0.304348	0.26	0.16954	0	0	0	0.141776	0.133227	0.165001	0.114985	DAU,EVK,ORQ,YAK	N	N
NELL1	rs7938616	Chr11:21515101	T	G	0.5625	0.447368	0.369565	0.56	0.623563	0.706522	0.555556	0.578704	0.00729466	0.0767443	0.149004	0.0118725		N	N
NELL1	rs79966371	Chr11:21515691	C	T	0.125	0.131579	0.195652	0.14	0.0488506	0	0.138889	0.208333	0.102496	0.104061	0.186989	0.103314		N	N
NELL1	rs117110405	Chr11:21516396	T	A	0.125	0.131579	0.195652	0.2	0.0603448	0.0108696	0	0	0.0630141	0.0685153	0.149266	0.149718	DAU,YAK	N	N
NELL1	rs4625458	Chr11:21516520	G	C	0.90625	0.684211	0.869565	0.74	0.87069	0.945652	0.861111	0.921296	-0.010503	0.165923	-0.00163775	0.0972776		N	N
NELL1	rs4382905	Chr11:21516533	G	A	0.09375	0.315789	0.130435	0.26	0.12931	0.0543478	0.138889	0.0787037	-0.010503	0.165923	-0.00163775	0.0972776		N	N
NELL1	rs4627074	Chr11:21516839	C	T	0.09375	0.315789	0.130435	0.28	0.12931	0.0543478	0.138889	0.0787037	-0.010503	0.165923	-0.00163775	0.117891		N	N
NELL1	rs78232210	Chr11:21516874	A	G	0.90625	0.684211	0.869565	0.72	0.87069	0.945652	0.861111	0.921296	-0.010503	0.165923	-0.00163775	0.117891		N	N
NELL1	rs9704246	Chr11:21516892	C	T	0.90625	0.684211	0.869565	0.72	0.87069	0.945652	0.861111	0.921296	-0.010503	0.165923	-0.00163775	0.117891		N	N
NELL1	rs78715423	Chr11:21516925	C	T	0.09375	0.315789	0.130435	0.28	0.12931	0.0543478	0.138889	0.0787037	-0.010503	0.165923	-0.00163775	0.117891		N	N
NELL1	rs9704598	Chr11:21516950	G	A	0.90625	0.684211	0.869565	0.72	0.87069	0.945652	0.861111	0.921296	-0.010503	0.165923	-0.00163775	0.117891		N	N
NELL1	rs7931720	Chr11:21516979	G	A	0.09375	0.315789	0.130435	0.28	0.12931	0.0543478	0.138889	0.0787037	-0.010503	0.165923	-0.00163775	0.117891		N	N
NELL1	rs6483776	Chr11:21517090	G	C	0.90625	0.684211	0.847826	0.7	0.867816	0.945652	0.861111	0.921296	-0.0113288	0.162589	0.00799095	0.137414		N	N
NELL1	rs6483777	Chr11:21517451	C	T	0.9375	0.684211	0.869565	0.72	0.87069	0.945652	0.861111	0.921296	-0.00840753	0.165923	-0.00163775	0.117891		N	N
NELL1	rs6483778	Chr11:21517509	C	T	0.09375	0.315789	0.130435	0.28	0.12931	0.0543478	0.138889	0.0787037	-0.010503	0.165923	-0.00163775	0.117891		N	N
NELL1	rs117939897	Chr11:21518121	C	T	0.125	0.131579	0.195652	0.2	0.0603448	0.0108696	0	0	0.0630141	0.0685153	0.149266	0.149718	DAU	N	N
NELL1	rs76399192	Chr11:21518356	C	T	0.09375	0.315789	0.152174	0.3	0.132184	0.0543478	0.0833333	0.0555556	-0.0113288	0.162589	0.00799095	0.137414		N	N
NELL1	rs4128394	Chr11:21518886	C	T	0.125	0.131579	0.195652	0.2	0.0603448	0.0108696	0	0	0.0630141	0.0685153	0.149266	0.149718	DAU	N	N
NELL1	rs78399936	Chr11:21519085	C	T	0.09375	0.315789	0.152174	0.3	0.132184	0.0543478	0.0833333	0.0555556	-0.0113288	0.162589	0.00799095	0.137414		N	N
NELL1	rs183299560	Chr11:21519499	T	C	0.125	0.131579	0.195652	0.2	0.0574713	0.0108696	0	0	0.0660857	0.0717675	0.154275	0.154731	DAU	N	N
NELL1	rs117698500	Chr11:21519711	G	C	0.125	0.131579	0.195652	0.2	0.0603448	0.0108696	0	0	0.0630141	0.0685153	0.149266	0.149718	DAU	N	N
NELL1	rs115311918	Chr11:21520341	T	A	0.875	0.868421	0.804348	0.8	0.939655	0.98913	1	0.967593	0.0630141	0.0685153	0.149266	0.149718		N	N
NELL1	rs74417564	Chr11:21520449	T	G	0.125	0.131579	0.195652	0.2	0.0603448	0.0108696	0	0	0.0630141	0.0685153	0.149266	0.149718	DAU	N	N
NELL1	rs146965468	Chr11:21522190	C	T	0.875	0.868421	0.804348	0.8	0.936782	0.98913	1	1	0.0601448	0.0654677	0.144498	0.144938		N	N
NELL1	rs117746803	Chr11:21522758	C	A	0.125	0.131579	0.195652	0.2	0.0632184	0.0108696	0	0	0.0601448	0.0654677	0.144498	0.144938		N	N
NELL1	rs181084526	Chr11:21522994	A	G	0.125	0.131579	0.195652	0.2	0.0632184	0.0108696	0	0	0.0601448	0.0654677	0.144498	0.144938		N	N
NELL1	rs80015582	Chr11:21523332	T	A	0.125	0.131579	0.195652	0.2	0.0632184	0.0108696	0	0	0.0601448	0.0654677	0.144498	0.144938		N	N
NELL1	rs79950404	Chr11:21523449	A	C	0.125	0.131579	0.195652	0.2	0.0632184	0.0108696	0	0	0.0601448	0.0654677	0.144498	0.144938		N	N
NELL1	rs78519575	Chr11:21523636	C	G	0.125	0.131579	0.195652	0.2	0.0632184	0.0108696	0	0	0.0601448	0.0654677	0.144498	0.144938		N	N
NELL1	rs4620715	Chr11:21525384	G	A	0.1875	0.315789	0.282609	0.42	0.166667	0.0652174	0.194444	0.231481	0.0097945	0.117799	0.0801762	0.227942		N	N
NELL1	rs149602575	Chr11:21525772	G	A	0.875	0.868421	0.804348	0.8	0.936782	0.98913	1	1	0.0601448	0.0654677	0.144498	0.144938		N	N
NELL1	rs77866011	Chr11:21526357	G	A	0.875	0.868421	0.804348	0.8	0.936782	0.98913	1	0.944444	0.0601448	0.0654677	0.144498	0.144938		N	N
NELL1	rs118005697	Chr11:21526822	G	A	0.125	0.131579	0.195652	0.2	0.0603448	0.0108696	0	0	0.0630141	0.0685153	0.149266	0.149718		N	N
NELL1	rs117452713	Chr11:21528147	T	C	0.125	0.131579	0.195652	0.2	0.0632184	0.0108696	0	0	0.0601448	0.0654677	0.144498	0.144938		N	N
NELL1	rs78044644	Chr11:21528358	C	T	0.125	0.131579	0.195652	0.2	0.0632184	0.0108696	0	0	0.0601448	0.0654677	0.144498	0.144938		N	N
NELL1	rs61602626	Chr11:21532817	C	G	0.8125	0.657895	0.717391	0.58	0.824713	0.934783	0.694444	0.578704	0.00709845	0.138854	0.0738897	0.217433		N	N
NELL1	rs56346773	Chr11:21533511	T	C	0.8125	0.684211	0.717391	0.58	0.824713	0.934783	0.805556	0.740741	0.00709845	0.110402	0.0738897	0.217433		N	N
NELL1	rs55935979	Chr11:21533605	A	G	0.8125	0.684211	0.717391	0.6	0.827586	0.934783	0.805556	0.740741	0.00800535	0.112822	0.0759442	0.198356		N	N
NELL1	rs61194030	Chr11:21534234	G	C	0.8125	0.657895	0.717391	0.58	0.827586	0.934783	0.722222	0.680556	0.00800535	0.141533	0.0759442	0.220654		N	N
NELL1	rs77444385	Chr11:21539591	C	T	0.15625	0.184211	0.152174	0.02	0.0517241	0	0	0	0.149937	0.18006	0.121984	-0.00692067		N	N
NELL1	rs80197260	Chr11:21541621	A	T	0.8125	0.684211	0.717391	0.6	0.827586	0.934783	0.916667	0.787037	0.00800535	0.112822	0.0759442	0.198356		N	N
NELL1	rs2133979520	Chr11:21541972	A	C	0.0625	0	0	0	0	0	0	NA	0.185525	NA	NA	NA		N	N
NELL1	rs77961478	Chr11:21542245	G	A	0.125	0.131579	0.173913	0.2	0.0603448	0	0	0	0.0885486	0.0893903	0.135493	0.163918		N	N
NELL1	rs56372936	Chr11:21545077	A	G	0.8125	0.684211	0.717391	0.6	0.83046	0.934783	0.805556	0.638889	0.0089041	0.115287	0.0780393	0.201492		N	N
NELL1	rs79408780	Chr11:21545841	G	A	0.125	0.131579	0.195652	0.2	0.0603448	0.0108696	0	0	0.0630141	0.0685153	0.14733	0.149718		N	N
NELL1		Chr11:21545870	T	C	0	0.0789474	0	0	0	0	0	NA	NA	0.204285	NA	NA		N	N
NELL1	rs12421934	Chr11:21547280	T	C	0.8125	0.684211	0.717391	0.58	0.827586	0.934783	0.805556	0.62963	0.00800535	0.112822	0.0759442	0.220654		N	N
NELL1	rs75943947	Chr11:21547871	G	A	0.125	0.236842	0.173913	0.26	0.066092	0.0108696	0	0	0.0574584	0.208402	0.111047	0.22118		N	N
NELL1	rs77690719	Chr11:21549454	A	T	0.8125	0.710526	0.73913	0.6	0.83908	0.923913	0.805556	0.74537	0.00691035	0.0877939	0.0583072	0.202445		N	N
NELL1	rs77234363	Chr11:21555179	C	T	0.125	0.105263	0.152174	0.2	0.0603448	0	0	0	0.0885486	0.061981	0.109573	0.163918		N	N
NELL1	rs373771110	Chr11:21560331	T	C	0	0.0263158	0	0.08	0	0	0	NA	NA	0.0676997	NA	0.17374		N	N
NELL1	rs1856944691	Chr11:21565309	C	T	0	0.0526316	0	0	0	0	0	NA	NA	0.14056	NA	NA		N	N
NELL1	rs117795718	Chr11:21568076	C	G	0.125	0.105263	0.152174	0.2	0.0603448	0	0	0	0.0885486	0.061981	0.109573	0.163918		N	N
a SNPs with LSBL values within the top 0.1% and 1% threshold in the whole genome level as extremely highly differentiated (red) and highly differentiated SNPs (blue), respectively.
b SNPs as archaic informative variants in these populations.
c SNPs with CADD_PHRED>15 as variants conserved in evolution.
